# Supplementary material for: Allosteric inhibition of a stem cell RNA-binding protein by an intermediary metabolite
Source: eLife. 2014 Jun 16;3:e02848. doi: 10.7554/eLife.02848 (PMC4094780; doi:10.7554/eLife.02848)
Supplement: Figure 5—source data 1. — DOI: http://dx.doi.org/10.7554/eLife.02848.015 [file elife02848s001.xlsx]

## Sheet: notes
	Carina Clingman090613 - Sean Ryder Lab
		data processed by		Mary Roth
	human kidney (HEK293t) cells											phospholipids		6 ul of phospholipid std
	Samples											lipid species	mass of ion	nmol/sample	used to quantify	Scan Mode
	see KLRC sheet			4000QTrap mass spec								lysoPG 14:0	455.3	0.3	LysoPG	-Prec153 or +NL189
												lysoPG 18:0	511.3	0.3	LysoPG	-Prec153 or +NL189
	Please note: 1. How to find your way around the file: a. Be careful because most of the sheets contain references to each other; thus alterations in one sheet will affect others. b. The sheet(s) at the far right of the file contain(s) the original processed data. c. The summary-IS-corrected sheet is where we subtract any contaminants in the mass spec or in our internal standards from each lipid s…
												di 14:0 PG	684.5	0.3	PG	+NL189
												di Phy (20:0)PG	852.7	0.3	PG	+NL189
												lysoPE 14:0	426.3	0.3	LysoPE	+NL141
												lysoPE 18:0	482.3	0.3	LysoPE	+NL141
												di 12:0 PE	580.5	0.3	PE	+NL141
												di 23:0 PE	888.9	0.3	PE	+NL141
												lysoPC 13:0	454.3	0.6	LysoPC	+Prec184
												lysoPC 19:0	538.3	0.6	LysoPC	+Prec184
												di 12:0 PC	622.4	0.6	PC	+Prec184
												di 24:1 PC	954.9	0.6	PC	+Prec184
												lysoPA 14:0	400.3	0.3	LysoPA	+NL115
												lysoPA 18:0	456.3	0.3	LysoPA	+NL115
												di14:0 PA	610.5	0.3	PA	+NL115
												di Phy (20:0)PA	778.7	0.3	PA	+NL115
												di 14:0 PS	680.6	0.2	PS	+NL185
												di Phy PS	848.8	0.2	PS	+NL185
												PI 16:0-18:0	856.7	0.234	PI	+NL277
												PI di 18:0	884.7	0.164	PI	+NL277
												OTHER STANDARDS USED				used to quantify	Scan Mode
												DAG 15:0	580.5	2.32	5ul	DAG	+NL259
												TAG 17:1	860.9	1.55	1ul	TAG	+NL285
													quantify DAG, TAG, sterol esters in the +NL297 (18:2containing), +NL295(18:3containing) scans
													mass and intensity from +NL285 copied and pasted into this data.
																used to quantify	Scan Mode
												Ceramide	510.49	0.2	6 ul
												HexCer	644.5	0.2	premix	HexCer	+NL162.05
												DiHexCer	806.56	0.2	of the 3
												CE 13:0	600.8	5	10 ul	Cholesterol esters	+Prec 369.34
												CE 23:0	740.9	5	premix	Chol esters	+Prec 369.34
												Lipid Abbreviations
												lysoPG	lysophosphatidylglycerol
												PG	phosphatidylglycerol
												lysoPE	lysophosphatidylethanolamine
												PE	phosphatidylethanolamine
												ePE	ether-linked phosphatidylethanolamine
												PE-cer	ceramide phospharylethanolamine (sphingolipid analog of PE)
												lysoPC	lysophosphatidylcholine
												PC	phosphatidylcholine
												ePC	ether-linked phosphatidylcholine
												SM	sphingomyelin
												DSM	dihydro sphingomyelin
												PA	phosphatidic acid
												PI	phosphatidylinositol
												PS	phosphatidylserine
												DAG	diacylglycerol
												TAG	triacylglycerol
												CE	cholesterol ester
												Cer	ceramide
												HexCer	hexosylceramide
												diHexCer	dihexosylceramide

## Sheet: KLRC data
Please send these data via e-mail to mrroth@ksu.edu.						Reference information about the samples.
It will be included in your final data file. This information will eventually facilitate inclusion						Please indicate your notebook reference or preparation
of your data into a lipidomics database. Inclusion of this information about your samples in the						information (including published references), so that
data file with the profiling results also facilitates good recordkeeping for you. In the future,						it will be clear in the future what the samples were
we plan to release lipidomics data through a database (under development) via a personal						and how they were prepared.
account, and you will have a confidential login and password to access your data. Your data
will remain confidential and will not be available for public viewing, unless you release it for that						Other information about the samples.
purpose. If the samples do not originate from plants, please provide comparable appropriate data.						Cell line, genotype, etc. Please include information
Purchase Order #:			pull down menu below:			for your reference and/or anything that would help
Date:		Choose Analysis:	other analysis only after discussion with KLRC			us optimally analyze your samples.
complete the form.			details of "other" analysis:
print a copy to include with the samples			8/13/13Ruth- The samples I sent are for diagnostic purposes. I'd like to know if you can detect any non-esterified fatty acids as well as your standard polar lipids.
also send to my email: mrroth@ksu.edu			8/6/13 1) polar lipids 2) pre 18:1 and 18:0 see Ruth after, 3)NL18:1, 18:0 DAG TAG SE 4) FFA
Researchers name	Carina Clingman	address	364 Plantation st. LRB 970W, Worcester, MA 01605	e-mail	carina.clingman@umassmed.edu	phone	(508) 856-3718
Principal Investigator name	Sean Ryder	address	364 Plantation st. LRB 906, Worcester, MA 01605	e-mail	sean.ryder@umassmed.edu	phone	(508) 856-1372
Billing contact	Karen Lekas	address	364 Plantation st. LRB 808, Worcester, MA 01605	e-mail	Karen.Lekas@umassmed.edu	phone	(508) 856-2151
Genus:	Homo	Strain/Line/Ecotype:	HEK293t	Tissue type:	Kidney
species:	Human
Plant age:		Growth stage:		Growth media:
Soil type:		Temperature:		Humidity:
Time of sampling:		Light intensity(lumens):		Light cycle:
Abbreviations used:
An additional $3 fee per sample will be charged to transfer samples into the required 2.0 ml clear glass vials with solid teflon-lined caps.			Amount of material in each sample (please indicate unit: see note to right)			Indicate the unit of normalization clearly in the bright yellow highlighted cell.
	Sample number	Sample name	Units:	genotype	Treatment		examples:
sample1 - rep1	1	Msi1 OE	25.4 x 10^6				dry extracted tissue grams
sample1 - rep2	2						dry lipid grams
sample1 - rep3	3						protein mg
sample1 - rep4	4						cell numbers
sample1 - rep5	5					this number is necessary to estimate amount to use for analysis
sample2 - rep1	6	Mock OE	34.8 x 10^6				examples:
sample2 - rep2	7					dry extracted tissue wt		dry lipid wt		protein
sample2 - rep3	8					Units: grams		Units: grams		Units: mg
sample2 - rep4	9					0.012856		0.003585		0.001067
sample2 - rep5	10					0.010965		0.005218		0.000345
sample3 - rep1	11					0.009475		0.002493		0.000862
sample3 - rep2	12
sample3 - rep3	13
sample3 - rep4	14					In regards to using fresh tissue or dry lipid weights:
sample3 - rep5	15					data from particularly fatty tissues can be a little skewed if the neutral lipid amounts are quite varied.
sample4 - rep1	16					Taking a protein amount helps to see the data in yet another view.
sample4 - rep2	17					The data is reported as nmol per weight, as percent of total signal, and where protein is provided, as nmol per mg protein.
sample4 - rep3	18
sample4 - rep4	19
sample4 - rep5	20
add samples as needed

## Sheet: sample list
Sample list for		Carina Clingman111313 - Sean Ryder Lab				Batch file (PL):	4000QTrap mass spec
		arrive 11/5/13				Method file (PL):	animal+PGs+FFA-Fleming090613.dam
		PLstd #14of22 from batch Dec 2012				1200 ul total
		GLstd #14of32 from batch 5/9/11					SINGLE VIAL - 2 stds
position#	Sample#	Sample name	PL file name	dry weights(g)	total volume	Amt. -PL samples (ml)	PL i.s. (ul)	FFA i.s. (ul)	chloroform	methanol- 300 mM ammonium acetate(100:5.26)(ul)	Notes
1		std1					5	10	360	840
2	1	1-Undiff CG4 1	1.0 x 10^6		1	0.125	5	10	235	840
3	2	2-Undiff CG4 2	1.2 x 10^6		1	0.125	5	10	235	840
4	3	3-Undiff CG4 3	1.0 x 10^6		1	0.125	5	10	235	840
5	4	4-Undiff CG4 4	1.1 x 10^6		1	0.125	5	10	235	840
6	5	5-Undiff CG4 5	1.1 x 10^6		1	0.125	5	10	235	840
7	6	6-Diff CG4 1	1.1 x 10^6		1	0.125	5	10	235	840
8	7	7-Diff CG4 2	1.6 x 10^6		1	0.08	5	10	280	840
9	8	8-Diff CG4 3	1.4 x 10^6		1	0.1	5	10	260	840
10	9	9-Diff CG4 4	1.5 x 10^6		1	0.08	5	10	280	840
11	10	10-Diff CG4 5	1.3 x 10^6		1	0.1	5	10	260	840
12		std2					5	10	360	840
13	11	11-MSI1 OE 1	2.7 x 10^6		1	0.045	5	10	315	840
14	12	12-MSI1 OE 2	1.8 x 10^6		1	0.07	5	10	290	840
15	13	13-MSI1 OE 3	3.3 x 10^6		1	0.04	5	10	320	840
16	14	14-MSI1 OE 4	3.45 x 10^6		1	0.035	5	10	325	840
17	15	15-MSI1 OE 5	3.45 x 10^6		1	0.035	5	10	325	840
18	16	16-Mock OE 1	2.3 x 10^6		1	0.05	5	10	310	840
19	17	17-Mock OE 2	3.1 x 10^6		1	0.04	5	10	320	840
20	18	18-Mock OE 3	3.6 x 10^6		1	0.035	5	10	325	840
21	19	19-Mock OE 4	4.0 x 10^6		1	0.03	5	10	330	840
22	20	20-Mock OE 5	2.8 x 10^6		1	0.045	5	10	315	840
23		std3					5	10	360	840
24										840
Sample list for		Carina Clingman111313 - Sean Ryder Lab				Batch file (PL):	4000QTrap mass spec
		arrive 11/5/13				Method file (PL):	DAG, TAG, SE
		PLstd #14of22 from batch Dec 2012				1400 ul total	Yeast-DAG-TAG-SE-090613.dam
		GLstd #14of32 from batch 5/9/11					SINGLE VIAL-2 stds
position#	Sample#	Sample name	PL file name	dry weights(g)	total volume	Amt. -PL samples (ml)	DAG i.s. (ul)	TAG i.s. (ul)	chloroform	methanol- 300 mM ammonium acetate(100:5.26)(ul)	Notes
1		std1					2.5	0.5	450	1050
2	1	Undiff CG4 1		1.0 x 10^6	1	0.125	2.5	0.5	325	1050
3	2	Undiff CG4 2		1.2 x 10^6	1	0.125	2.5	0.5	325	1050
4	3	Undiff CG4 3		1.0 x 10^6	1	0.125	2.5	0.5	325	1050
5	4	Undiff CG4 4		1.1 x 10^6	1	0.125	2.5	0.5	325	1050
6	5	Undiff CG4 5		1.1 x 10^6	1	0.125	2.5	0.5	325	1050
7	6	Diff CG4 1		1.1 x 10^6	1	0.125	2.5	0.5	325	1050
8	7	Diff CG4 2		1.6 x 10^6	1	0.08	2.5	0.5	370	1050
9	8	Diff CG4 3		1.4 x 10^6	1	0.1	2.5	0.5	350	1050
10	9	Diff CG4 4		1.5 x 10^6	1	0.08	2.5	0.5	370	1050
11	10	Diff CG4 5		1.3 x 10^6	1	0.1	2.5	0.5	350	1050
12		std2					2.5	0.5	450	1050
13	11	MSI1 OE 1		2.7 x 10^6	1	0.045	2.5	0.5	405	1050
14	12	MSI1 OE 2		1.8 x 10^6	1	0.07	2.5	0.5	380	1050
15	13	MSI1 OE 3		3.3 x 10^6	1	0.04	2.5	0.5	410	1050
16	14	MSI1 OE 4		3.45 x 10^6	1	0.035	2.5	0.5	415	1050
17	15	MSI1 OE 5		3.45 x 10^6	1	0.035	2.5	0.5	415	1050
18	16	Mock OE 1		2.3 x 10^6	1	0.05	2.5	0.5	400	1050
19	17	Mock OE 2		3.1 x 10^6	1	0.04	2.5	0.5	410	1050
20	18	Mock OE 3		3.6 x 10^6	1	0.035	2.5	0.5	415	1050
21	19	Mock OE 4		4.0 x 10^6	1	0.03	2.5	0.5	420	1050
22	20	Mock OE 5		2.8 x 10^6	1	0.045	2.5	0.5	405	1050
23		std3					2.5	0.5	450	1050
24									450	1050
				1
				1.2
				1
				1.1
				1.1
				1.1
				1.6
				1.4
				1.5
				1.3
				2.7
				1.8
				3.3
				3.45
				3.45
				2.3
				3.1
				3.6
				4
				2.8

## Sheet: summary
Row #	Summary				nmol per sample sent		nmol per sample sent		nmol per sample sent		nmol per sample sent			nmol per million cells		nmol per million cells		nmol per million cells		nmol per million cells			% total signal		% total signal		% total signal		% total signal			Percent polar, neutrals		Percent polar, neutrals		Percent polar, neutrals		Percent polar, neutrals
					5_Undiff_CG4_5		10_Diff_CG4_5		15_MSI1_OE_5		20_Mock_OE_5			5_Undiff_CG4_5		10_Diff_CG4_5		15_MSI1_OE_5		20_Mock_OE_5			5_Undiff_CG4_5		10_Diff_CG4_5		15_MSI1_OE_5		20_Mock_OE_5			5_Undiff_CG4_5		10_Diff_CG4_5		15_MSI1_OE_5		20_Mock_OE_5
	Mass	Compound Formula	Compound Name	alternate IDs	ave	stdev	ave	stdev	ave	stdev	ave	stdev		ave	stdev	ave	stdev	ave	stdev	ave	stdev		ave	stdev	ave	stdev	ave	stdev	ave	stdev		ave	stdev	ave	stdev	ave	stdev	ave	stdev
1	494.3	C24H48O7PN	LPC(16:1)		0.00128	0.000438178	0.00484	0.00425256	0.0854048	0.0610687	0.0972857	0.0273776		0.0012097	0.000472292	0.00369062	0.00331385	0.0292739	0.0169686	0.031988	0.0105701		0.00224096	0.000931416	0.006048	0.00432544	0.0684166	0.0335992	0.0841811	0.0121772		0.0147951	0.00558318	0.0297428	0.0213756	0.190399	0.0735777	0.229627	0.0252234
2	496.3	C24H50O7PN	LPC(16:0)		0.00848	0.0033752	0.02702	0.0225227	0.166492	0.135047	0.208859	0.0782444		0.00775273	0.00250651	0.0208077	0.0184467	0.0562922	0.0370485	0.0668152	0.0210482		0.0142349	0.00422978	0.0340163	0.0234704	0.130637	0.0699598	0.180687	0.0447841		0.0974964	0.0407025	0.170173	0.122664	0.366534	0.145276	0.486545	0.0808543
3	518.3	C26H48O7PN	LPC(18:3)		0.00064	0.000357771	0.00016	0.000357771	0.00180159	0.0011362	0.00241111	0.00151922		0.000598788	0.000339351	0.000145455	0.000325246	0.000640486	0.000359145	0.000834513	0.000615874		0.00103822	0.000590474	0.00020718	0.000463269	0.00151362	0.000881334	0.00227048	0.00141819		0.00721006	0.00406736	0.00116941	0.00261488	0.0040947	0.00253609	0.00628119	0.00394606
4	520.3	C26H50O7PN	LPC(18:2)		0.00192	0.00133866	0.00225	0.00265754	0.0385714	0.0212372	0.0377048	0.00742631		0.00177939	0.00130049	0.00175108	0.00205873	0.013372	0.00603187	0.0121455	0.00245503		0.00339722	0.00236787	0.00267178	0.00288713	0.0316934	0.0114125	0.0337593	0.0088069		0.0212545	0.0141584	0.0131236	0.0145866	0.0906293	0.0209232	0.0907517	0.0139505
5	522.3	C26H52O7PN	LPC(18:1)		0.01312	0.00813093	0.03358	0.0181177	0.544635	0.30766	0.586343	0.158272		0.0118497	0.00702726	0.0253607	0.0152969	0.189486	0.0887371	0.188626	0.0475415		0.0228937	0.0134512	0.0442817	0.0160831	0.447023	0.164717	0.516692	0.12018		0.148565	0.0946559	0.220807	0.0870613	1.27081	0.29145	1.38874	0.157929
6	524.4	C26H54O7PN	LPC(18:0)		0.00896	0.00359555	0.02134	0.0149146	0.0569444	0.0420826	0.0749095	0.0337204		0.00830303	0.00316737	0.016561	0.0133553	0.0194758	0.0116777	0.0247191	0.0108167		0.0149466	0.0046658	0.0276294	0.0156605	0.0453879	0.0226808	0.0629955	0.0176234		0.103656	0.043629	0.14141	0.091042	0.126446	0.0484671	0.173607	0.0503934
7	542.3	C28H48O7PN	LPC(20:5)		0.00128	0.00091214	0.00114	0.00158051	0.00993651	0.00316188	0.00879524	0.00469668		0.00118303	0.000892273	0.000915152	0.00132788	0.00354091	0.00122402	0.00276751	0.00117104		0.00220374	0.0015027	0.00162768	0.00222941	0.00849208	0.00199404	0.00752286	0.00268952		0.0142613	0.010027	0.0079978	0.0112113	0.0250512	0.00326287	0.0203335	0.00663221
8	544.3	C28H50O7PN	LPC(20:4)		0.00016	0.000357771	0.00036	0.000497996	0.031619	0.0189928	0.0317667	0.00645884		0.000145455	0.000325246	0.000299301	0.000410103	0.0115217	0.00692476	0.0103145	0.00230219		0.00028932	0.000646939	0.000559481	0.000807913	0.0266311	0.0142515	0.0280811	0.00471411		0.00163936	0.00366573	0.00256127	0.00352914	0.0719419	0.0349812	0.0760398	0.0056959
9	546.3	C28H52O7PN	LPC(20:3)		0.00128	0.00091214	0.003	0.00177658	0.0155397	0.00909664	0.0126667	0.00829993		0.00115394	0.000811777	0.00225165	0.00142132	0.00562933	0.00319738	0.00422338	0.0024941		0.00232368	0.00193657	0.00398287	0.00202527	0.0129801	0.00608324	0.0106145	0.0070158		0.0147247	0.010766	0.0194487	0.00924733	0.0355521	0.0128761	0.0291196	0.0178323
10	548.4	C28H54O7PN	LPC(20:2)		0.00144	0.00131453	0.00194	0.000797966	0.00273016	0.00287122	0.00375556	0.00230994		0.00138182	0.00128668	0.00149814	0.000859236	0.00113079	0.0013328	0.00132845	0.000974278		0.00245786	0.00207304	0.00271084	0.0010513	0.00237539	0.00266018	0.0034804	0.00197158		0.016379	0.0152994	0.0135427	0.00597244	0.00596399	0.00641314	0.00971289	0.0058395
11	550.4	C28H56O7PN	LPC(20:1)		0.00688	0.00268924	0.00528	0.000944458	0.0388651	0.0222993	0.0525413	0.0164205		0.00654061	0.00292121	0.00392783	0.00116442	0.0133833	0.0061619	0.0166519	0.00401971		0.0119362	0.00464322	0.00736456	0.000828248	0.0316257	0.00999902	0.0466409	0.0137022		0.0792764	0.0338659	0.037376	0.0108199	0.0921233	0.0148613	0.124427	0.0231468
12	552.4	C28H58O7PN	LPC(20:0)		0.00208	0.00165892	0.00327	0.00188136	0.0066746	0.00215392	0.00974762	0.00461203		0.00198545	0.00166274	0.00228404	0.00116124	0.00225374	0.000350805	0.00310315	0.00142419		0.003376	0.00264138	0.00445903	0.00244844	0.00568211	0.00146092	0.00888875	0.00458114		0.0241435	0.0189304	0.0235878	0.017104	0.0187222	0.0113118	0.0233801	0.00965377
13	568.3	C30H50O7PN	LPC(22:6)		0.0008	0.0008	0.00142	0.000388265	0.0221429	0.0103263	0.0220206	0.00508312		0.000732121	0.000739374	0.00106438	0.000397836	0.00786896	0.00347118	0.00704576	0.00138206		0.00130054	0.0012188	0.00209041	0.000901828	0.0185762	0.00618494	0.0197426	0.00566472		0.00951456	0.00948063	0.0102678	0.00376137	0.0530058	0.00928955	0.0528443	0.00916232
14	570.3	C30H52O7PN	LPC(22:5)		0.00336	0.000876356	0.00154	0.00146901	0.0245714	0.0127536	0.0241365	0.00403005		0.00308121	0.000634045	0.00120087	0.00123197	0.00866198	0.00401795	0.00789758	0.00213858		0.00588284	0.00209178	0.00203981	0.00203531	0.0204473	0.00762736	0.0213443	0.00331751		0.0382863	0.00991048	0.00986997	0.0102852	0.0580344	0.014093	0.0580992	0.00598454
15	Total LysoPC				0.05168	0.0100971	0.10714	0.0664399	1.04593	0.640737	1.17294	0.329114		0.047697	0.00704853	0.0817579	0.0571289	0.362531	0.182536	0.378461	0.10029		0.0885217	0.0164827	0.139689	0.064546	0.851481	0.338323	1.0269	0.208745		0.591203	0.124807	0.701077	0.356815	2.4093	0.619323	2.76951	0.254837
16	676.5	C36H70O8PN	PC(28:1)		0.00896	0.00285096	0.00959	0.00405469	0.0139206	0.00678365	0.0151889	0.00353457		0.00832727	0.00269189	0.00734651	0.00410313	0.0051286	0.0030548	0.00491785	0.00119529		0.0149477	0.00286562	0.0131353	0.00443455	0.0118753	0.0053172	0.0133502	0.00227241		0.103245	0.0365229	0.0650118	0.0260383	0.0335549	0.00909612	0.0361073	0.00171731
17	704.5	C38H74O8PN	PC(30:1)		0.03376	0.00359555	0.04932	0.0165322	0.0129762	0.00948877	0.0563857	0.0196567		0.03152	0.00496083	0.0363869	0.0124704	0.00452723	0.00334924	0.0187048	0.00912989		0.058487	0.0116244	0.0686042	0.0187677	0.0119354	0.0090133	0.0493825	0.0151338		0.385608	0.0471559	0.32819	0.0224023	0.0399521	0.0327638	0.136828	0.0462385
18	706.5	C38H76O8PN	PC(30:0)		0.1528	0.0234947	0.24998	0.0736174	0.415762	0.176207	0.784954	0.224682		0.142339	0.0260708	0.184846	0.0579988	0.147273	0.0591422	0.256029	0.0767705		0.263076	0.0506269	0.34907	0.0892311	0.351218	0.112944	0.680847	0.103869		1.73334	0.169683	1.67506	0.0713281	1.01706	0.21115	1.85157	0.171971
19	730.5	C40H76O8PN	PC(32:2)		0.06096	0.00716436	0.1097	0.0295515	0.0994841	0.036762	0.141252	0.023378		0.056737	0.00820377	0.0810606	0.0236896	0.0350836	0.0121434	0.0467057	0.0141705		0.10603	0.0239901	0.153482	0.0367654	0.0839169	0.017931	0.12495	0.0182184		0.693161	0.0522015	0.739405	0.0223019	0.247347	0.018337	0.340729	0.0380093
20	732.5	C40H78O8PN	PC(32:1)		0.73936	0.0575094	1.41605	0.394802	2.31918	0.955727	2.90922	0.602395		0.68791	0.076185	1.04596	0.312492	0.822947	0.327122	0.95041	0.249027		1.27893	0.226156	1.97714	0.467775	1.95211	0.517518	2.55229	0.301691		8.41753	0.246392	9.52811	0.267149	5.66813	0.396699	6.94191	0.134504
21	734.6	C40H80O8PN	PC(32:0)		0.23936	0.0250593	0.34256	0.100379	0.628413	0.295265	1.04503	0.183547		0.222696	0.0299321	0.253614	0.0817276	0.223462	0.09865	0.342295	0.0866712		0.412837	0.0694646	0.474306	0.0962012	0.526269	0.167824	0.919582	0.0855537		2.7235	0.182967	2.30327	0.156242	1.512	0.227312	2.5093	0.145373
22	754.5	C42H76O8PN	PC(34:4)		0.00112	0.000715542	0.00126	0.000454698	0.0082619	0.00423214	0.00855238	0.00210862		0.00106182	0.000669723	0.000907932	0.000293494	0.00305327	0.00182659	0.00278526	0.000748438		0.00205208	0.00141172	0.00173699	0.000410263	0.0070172	0.00314378	0.00747718	0.00110557		0.0126442	0.00797123	0.00864263	0.00265122	0.0195951	0.00510031	0.0202942	0.00115734
23	756.5	C42H78O8PN	PC(34:3)		0.02144	0.00190997	0.03166	0.00590311	0.0666587	0.0233086	0.0728667	0.0192204		0.0199176	0.00196129	0.0231292	0.00411739	0.0236764	0.00853324	0.0237309	0.00648153		0.0371171	0.00710803	0.0451478	0.0120716	0.0564131	0.0108112	0.0635905	0.0100036		0.244162	0.0130991	0.219428	0.0389513	0.167393	0.013664	0.172759	0.0162476
24	758.6	C42H80O8PN	PC(34:2)		0.44032	0.0370971	0.75927	0.198298	1.16566	0.457706	1.27373	0.241777		0.409702	0.0465967	0.56036	0.157983	0.415744	0.167005	0.417393	0.111022		0.761348	0.135145	1.06321	0.24955	0.985072	0.254668	1.11867	0.113777		5.01019	0.0858864	5.12972	0.171787	2.86598	0.129122	3.04846	0.112065
25	760.6	C42H82O8PN	PC(34:1)		2.44512	0.219851	4.35757	1.1907	10.4931	4.20472	10.7691	2.27037		2.27902	0.30446	3.21579	0.939347	3.73221	1.48368	3.5262	0.963881		4.23441	0.798205	6.08221	1.37793	8.84558	2.23768	9.42962	0.988677		27.8291	1.24032	29.3771	0.730577	25.7696	0.931654	25.6884	0.897065
26	762.6	C42H84O8PN	PC(34:0)		0.05424	0.0116948	0.05069	0.0141308	0.134952	0.0513906	0.228765	0.0652395		0.0502352	0.0100592	0.0379586	0.013019	0.0479799	0.0184592	0.0773551	0.0370125		0.0933916	0.0236285	0.0715629	0.0221594	0.113931	0.0242815	0.197714	0.023731		0.613375	0.0897729	0.341398	0.0574545	0.341177	0.0640539	0.549186	0.135486
27	778.5	C44H76O8PN	PC(36:6)		0.00208	0.00091214	0.0002	0.000447214	0.0123492	0.00597973	0.0136333	0.00541654		0.00195636	0.000936461	0.000153846	0.00034401	0.00435628	0.0019694	0.00443373	0.00183115		0.00349499	0.00140605	0.000352301	0.000787769	0.0102562	0.00273426	0.0116518	0.00329837		0.0239999	0.0105615	0.00139186	0.0031123	0.0304916	0.00591658	0.0314923	0.00717804
28	780.5	C44H78O8PN	PC(36:5)		0.00464	0.000669328	0.00402	0.00164378	0.0509524	0.0182698	0.0419492	0.00831599		0.00431758	0.000689653	0.00301933	0.00150085	0.0183405	0.00744252	0.0138442	0.00462475		0.00810525	0.00212657	0.00551491	0.00204225	0.0434772	0.0119191	0.0371948	0.00769931		0.0527135	0.0052316	0.0273886	0.0102235	0.126277	0.0120118	0.101136	0.0164588
29	782.6	C44H80O8PN	PC(36:4)		0.0216	0.0035327	0.02208	0.0048542	0.155405	0.0600847	0.122276	0.0189347		0.0201261	0.00365391	0.0163366	0.0043816	0.0562977	0.0253729	0.040431	0.0118479		0.0376353	0.00985337	0.0308175	0.00528084	0.132373	0.0394247	0.107627	0.0071251		0.245536	0.0310476	0.151015	0.0158756	0.382277	0.0314964	0.295125	0.0309173
30	784.6	C44H82O8PN	PC(36:3)		0.13008	0.0127197	0.20381	0.0518598	0.346881	0.127704	0.310552	0.0504655		0.12105	0.0149856	0.150362	0.0409683	0.124333	0.0504608	0.101593	0.0248039		0.225519	0.0452171	0.28674	0.0746941	0.294395	0.0728907	0.27452	0.0359708		1.47941	0.0547965	1.37911	0.10591	0.860751	0.0290526	0.746432	0.0377111
31	786.6	C44H84O8PN	PC(36:2)		1.4136	0.139108	2.27865	0.554366	3.3771	1.17694	3.52614	0.68128		1.31534	0.160681	1.6801	0.443858	1.20595	0.453966	1.15378	0.298124		2.45444	0.516548	3.20243	0.764428	2.86866	0.646875	3.09851	0.345733		16.082	0.758226	15.4591	0.82488	8.42807	0.371598	8.43545	0.29557
32	788.6	C44H86O8PN	PC(36:1)		0.30608	0.0332775	0.50093	0.137744	1.71296	0.757053	1.43885	0.311849		0.285985	0.046997	0.370034	0.109366	0.605838	0.247166	0.475528	0.153593		0.528212	0.0913434	0.70086	0.171672	1.43372	0.388487	1.25338	0.0452629		3.48541	0.29971	3.37269	0.105606	4.16132	0.316201	3.43937	0.337703
33	790.6	C44H88O8PN	PC(36:0)	ePC(38:7)	0.00528	0.0039436	0.01561	0.00459734	0.0608968	0.0175278	0.0491095	0.0229941		0.00503273	0.00374789	0.011347	0.00309777	0.0219538	0.00820955	0.0151146	0.00508272		0.00961116	0.00778364	0.0215138	0.00366578	0.05263	0.0137693	0.0436023	0.0176676		0.0616097	0.048715	0.107721	0.0283621	0.157789	0.0379457	0.116235	0.0411327
34	806.6	C46H80O8PN	PC(38:6)		0.01184	0.00153883	0.00763	0.00214406	0.111016	0.043178	0.0792857	0.00968612		0.0109503	0.00101651	0.0057271	0.00233281	0.0390225	0.013788	0.0260912	0.00645404		0.0204181	0.00369867	0.0105358	0.0020735	0.0930921	0.0168491	0.0703432	0.00846905		0.134764	0.0148278	0.0532924	0.0166138	0.27764	0.032418	0.192177	0.021614
35	808.6	C46H82O8PN	PC(38:5)		0.02848	0.00302523	0.01867	0.00406288	0.140437	0.0367306	0.133103	0.0236137		0.0263903	0.0022283	0.0138743	0.00424923	0.0508836	0.0199569	0.0434662	0.010384		0.0490775	0.00830982	0.0258211	0.00199357	0.12112	0.0257787	0.1173	0.0131683		0.324294	0.0251144	0.129906	0.0300581	0.362704	0.0640565	0.319358	0.0140157
36	810.6	C46H84O8PN	PC(38:4)		0.06256	0.00860511	0.07648	0.0144917	0.11654	0.0354083	0.101643	0.0167736		0.0580509	0.00772116	0.056608	0.0138098	0.0421057	0.0165243	0.0335557	0.0100474		0.109429	0.0296482	0.107664	0.0214885	0.100206	0.0251829	0.0902042	0.0153496		0.711663	0.0772967	0.524632	0.0440725	0.293643	0.0265227	0.245531	0.0300899
37	812.6	C46H86O8PN	PC(38:3)		0.0896	0.00731027	0.1261	0.0319186	0.0893651	0.0262894	0.0897063	0.0208461		0.0833382	0.0093233	0.0925772	0.0238679	0.0323139	0.0125781	0.0293676	0.00840509		0.154965	0.0274404	0.178724	0.0524221	0.0769515	0.0190896	0.0783262	0.00937351		1.02029	0.046507	0.856618	0.0976306	0.225921	0.0221328	0.213209	0.0100539
38	814.6	C46H88O8PN	PC(38:2)		0.15472	0.0131039	0.22524	0.0480106	0.306325	0.11225	0.314113	0.0648781		0.144235	0.0191884	0.166515	0.0416863	0.109642	0.0434192	0.102775	0.0265187		0.267003	0.0434062	0.319441	0.0856713	0.259828	0.0620866	0.275404	0.0276551		1.76143	0.0769184	1.53778	0.144359	0.761229	0.0296199	0.751509	0.0547199
39	816.6	C46H90O8PN	PC(38:1)		0.02016	0.00153883	0.02425	0.00634921	0.0730556	0.0193165	0.0714222	0.00909429		0.0188024	0.00241018	0.0177029	0.00445747	0.026101	0.0084442	0.0236463	0.00683489		0.0351039	0.0078018	0.0336477	0.00535192	0.0638153	0.0182249	0.0638825	0.0125973		0.230328	0.022804	0.166372	0.0303478	0.190801	0.04828	0.176085	0.0424246
40	818.7	C46H92O8PN	PC(38:0)	ePC(40:7)	0.00272	0.00107331	0.00568	0.00363827	0.0630794	0.0210985	0.0357619	0.00550304		0.00253576	0.00101408	0.00408952	0.00250541	0.0222257	0.00733891	0.0117046	0.00324407		0.00491716	0.00261524	0.00777845	0.0041885	0.0532849	0.00757007	0.0320761	0.00796811		0.0309297	0.0124108	0.0358232	0.0148554	0.161213	0.0313704	0.0872645	0.0177376
41	830.6	C48H80O8PN	PC(40:8)		0.00192	0.00184174	0.00085	0.00131814	0.0305794	0.0102356	0.0370365	0.00739629		0.00181818	0.00178145	0.000584821	0.000934359	0.0107539	0.00334327	0.0121443	0.00330218		0.00354318	0.0032847	0.000984101	0.00141943	0.0260415	0.00639042	0.0324449	0.00245934		0.0212615	0.020233	0.00535736	0.00735015	0.0770227	0.0133418	0.0886962	0.00614167
42	832.6	C48H82O8PN	PC(40:7)		0.00496	0.000876356	0.00187	0.000849706	0.0719365	0.0209155	0.0647238	0.00678353		0.00461091	0.000844388	0.00136291	0.000591559	0.0255969	0.00837044	0.0213323	0.00538745		0.00869308	0.00286566	0.00254972	0.000968197	0.0613858	0.0104142	0.0577472	0.00924047		0.057093	0.0131055	0.0124082	0.00355525	0.183401	0.0220548	0.158491	0.0298448
43	834.6	C48H84O8PN	PC(40:6)		0.01328	0.00184174	0.0072	0.00264221	0.0716667	0.0204152	0.0666587	0.00760728		0.0123709	0.00209941	0.00540498	0.00225868	0.0260231	0.0104139	0.0221612	0.00639421		0.0230758	0.00530532	0.00989974	0.00262881	0.0619917	0.0165247	0.0594858	0.0100366		0.150837	0.0136649	0.0476818	0.00805177	0.181533	0.0215344	0.163256	0.0321164
44	836.6	C48H86O8PN	PC(40:5)		0.00944	0.00190997	0.00942	0.00291239	0.0630238	0.0217996	0.0556492	0.00669371		0.00875394	0.00169303	0.00686044	0.00216453	0.0225424	0.00883328	0.018212	0.00404012		0.0164087	0.00458819	0.0136881	0.00600886	0.0535008	0.0111147	0.0495714	0.0075966		0.106845	0.0140957	0.0651523	0.0196489	0.159098	0.0194275	0.134784	0.0129689
45	838.6	C48H88O8PN	PC(40:4)		0.01808	0.00243967	0.01919	0.00506883	0.0211111	0.0080703	0.0167794	0.00452915		0.0168873	0.00298244	0.0143827	0.00507206	0.00751151	0.00303061	0.00543022	0.00159141		0.0316535	0.00853499	0.0270145	0.00754701	0.0180985	0.00616932	0.0152786	0.00581846		0.20624	0.028192	0.130992	0.0275601	0.0531424	0.0140485	0.0408909	0.0117633
46	840.6	C48H90O8PN	PC(40:3)		0.01536	0.00118659	0.01753	0.00525994	0.00813492	0.00411227	0.00961905	0.00377063		0.0142327	0.00064416	0.0128565	0.00382706	0.00290042	0.00137118	0.00326869	0.00152773		0.0265364	0.00475638	0.024375	0.00550734	0.00680086	0.00248227	0.00841145	0.00367538		0.175818	0.0208108	0.11805	0.00938385	0.0192663	0.00416592	0.0235182	0.0114326
47	842.7	C48H92O8PN	PC(40:2)		0.02304	0.00143108	0.02894	0.0067467	0.0381111	0.0167391	0.0370857	0.0093055		0.0214255	0.00200601	0.0215928	0.00656348	0.0135334	0.00568696	0.0121086	0.00324722		0.0396066	0.00478138	0.0416376	0.0142981	0.0319308	0.00847799	0.0323953	0.00453769		0.262713	0.013555	0.199463	0.0416699	0.0928768	0.00409608	0.0883706	0.010746
48	852.5	C50H78O8PN	PC(42:11)		0.00096	0.000669328	0.00065	0.00060208	0.00257143	0.00433307	0.00464286	0.0045034		0.000904242	0.000646505	0.00046337	0.00042509	0.000771692	0.00131254	0.00130133	0.00124051		0.00157131	0.00113729	0.000957847	0.000944288	0.00225652	0.00376427	0.00441867	0.00484816		0.010786	0.00753748	0.00398803	0.00386372	0.00765392	0.0114178	0.0109546	0.0118385
49	854.6	C50H80O8PN	PC(42:10)		0.00224	0.00153883	0.00165	0.00147479	0.00846032	0.00620917	0.00775079	0.00565577		0.0020703	0.00146377	0.00109879	0.000913264	0.00322024	0.0027181	0.00246012	0.00161716		0.00403067	0.00285212	0.00245502	0.00224224	0.00714199	0.00495551	0.00645998	0.00358977		0.0248278	0.0162075	0.0132954	0.0151997	0.0195021	0.0100814	0.017778	0.00950611
50	856.6	C50H82O8PN	PC(42:9)		0.0032	0.000565685	0.00366	0.00325142	0.0188016	0.00677494	0.0170683	0.00679145		0.00298909	0.000610866	0.00258559	0.00224132	0.00661284	0.00222264	0.00560132	0.00256195		0.00558431	0.00151752	0.00492361	0.00397817	0.0159145	0.00380223	0.0152363	0.00649361		0.0363619	0.00515134	0.0222913	0.0160489	0.047298	0.00841094	0.0407885	0.0140067
51	858.6	C50H84O8PN	PC(42:8)		0.00064	0.00143108	0.00036	0.000497996	0.00514286	0.00480221	0.00849683	0.00182612		0.000581818	0.00130099	0.000299301	0.000410103	0.00189661	0.00181086	0.0027827	0.000736297		0.00115728	0.00258775	0.000559481	0.000807913	0.00435288	0.00418777	0.00749828	0.00129244		0.00655746	0.0146629	0.00256127	0.00352914	0.0114928	0.0114136	0.0205853	0.00420756
52	860.6	C50H86O8PN	PC(42:7)		0.00032	0.000438178	0.0002	0.000447214	0.00760317	0.00405943	0.00589841	0.00252789		0.000293333	0.00040442	0.000142857	0.000319438	0.00259222	0.00109591	0.00196849	0.000944709		0.000505134	0.000694647	0.000206067	0.00046078	0.0062509	0.00197828	0.00516102	0.00213186		0.00363408	0.00497786	0.000936082	0.00209314	0.0199194	0.0108552	0.0139738	0.00480822
53	862.6	C50H88O8PN	PC(42:6)		0.00096	0.00131453	0.00041	0.000583524	0.0135794	0.00545288	0.0105571	0.00391432		0.000872727	0.00119503	0.000312121	0.000429031	0.00483114	0.00197931	0.0032647	0.00075832		0.00190036	0.00261837	0.000606659	0.000897566	0.0114273	0.00263599	0.00954886	0.00412229		0.0107201	0.014762	0.00282949	0.00397035	0.0337309	0.00307797	0.0251878	0.00845134
54	864.6	C50H90O8PN	PC(42:5)		0.0008	0.000979796	0.0005	0.000684653	0.00892063	0.00408773	0.00467619	0.00268159		0.000729697	0.000891976	0.000322917	0.000442555	0.00321067	0.00149892	0.00163797	0.00102231		0.00153754	0.00212322	0.000765378	0.00104972	0.00755272	0.00280322	0.00397203	0.00252306		0.0094361	0.0118483	0.00420919	0.0059741	0.0213071	0.0050303	0.0113129	0.0075189
55	866.7	C50H92O8PN	PC(42:4)		0.0016	0.0016	0.00155	0.00158509	0.00301587	0.00328384	0.00278095	0.00353242		0.00145697	0.0014538	0.00109341	0.00108166	0.000985865	0.000909132	0.00081677	0.000972619		0.00295721	0.00308614	0.00231517	0.00253792	0.00228479	0.00186967	0.00224313	0.00257848		0.0177891	0.0167233	0.00963613	0.0104541	0.00707384	0.00563262	0.0059978	0.00669654
56	868.7	C50H94O8PN	PC(42:3)		0.01456	0.00296108	0.0127	0.00352846	0.0204603	0.00564285	0.0175397	0.00746074		0.0134812	0.00257977	0.00935856	0.0027718	0.00737692	0.00267305	0.0054008	0.00125135		0.0257284	0.0091544	0.0187667	0.00807477	0.0179042	0.00553347	0.0166711	0.010412		0.166005	0.0350016	0.0904778	0.028867	0.0529083	0.0127806	0.0441182	0.0239973
57	870.7	C50H96O8PN	PC(42:2)		0.004	0.000979796	0.00465	0.00277038	0.012881	0.00707728	0.0164667	0.00327957		0.00373576	0.00107443	0.00337127	0.00184385	0.00466448	0.00252724	0.00539148	0.00142473		0.00678448	0.00122428	0.00650506	0.00432305	0.0108062	0.00477112	0.014773	0.00392179		0.0458791	0.0128569	0.0309661	0.0163425	0.0298384	0.0096724	0.0405146	0.0120328
58	878.6	C52H80O8PN	PC(44:12)		0.00064	0.000669328	0.0004	0.000547723	0.00310317	0.00216049	0.00166667	0.00235702		0.000596364	0.000613673	0.000296703	0.000406742	0.00112946	0.00073622	0.000489247	0.000724411		0.00124829	0.00141212	0.000558368	0.000807096	0.00259315	0.00161973	0.00165622	0.00227918		0.00728779	0.007983	0.00232794	0.00328792	0.00691232	0.00438798	0.00403292	0.00554623
59	880.6	C52H82O8PN	PC(44:11)		0.00048	0.000715542	0.00036	0.000497996	0.00424603	0.00431957	0.00191111	0.00185659		0.000412121	0.000603631	0.000288312	0.000394814	0.00146072	0.00123573	0.000673223	0.000721588		0.000758188	0.00108563	0.000413247	0.000565866	0.00327826	0.00252905	0.00182436	0.00174667		0.0053467	0.00818322	0.00210549	0.00291242	0.00862298	0.00639565	0.00520018	0.00487669
60	882.6	C52H84O8PN	PC(44:10)		0.00032	0.000438178	0.00016	0.000357771	0.000285714	0.000638877	0	0		0.000290909	0.000398344	0.000145455	0.000325246	0.00015873	0.000354931	0	0		0.000633455	0.000872789	0.00020718	0.000463269	0.000317769	0.000710553	0	0		0.00357337	0.00492068	0.00116941	0.00261488	0.000763682	0.00170765	0	0
61	884.6	C52H86O8PN	PC(44:9)		0.0008	0.000979796	0.0007	0.00109545	0.00171429	0.00156492	0.0017381	0.00161396		0.000729697	0.000891976	0.000487179	0.000738711	0.000648723	0.000668395	0.000486687	0.000444513		0.00134616	0.00177712	0.00115126	0.00176311	0.00149824	0.00146386	0.00160429	0.00162658		0.00870837	0.0100645	0.00471202	0.00729732	0.00492826	0.00541223	0.00400134	0.00400623
62	886.6	C52H88O8PN	PC(44:8)		0.00032	0.000438178	0	0	0.000444444	0.000993808	0.0005	0.00111803		0.000290909	0.000398344	0	0	0.000164609	0.000368077	0.00016129	0.000360656		0.000633455	0.000872789	0	0	0.000419203	0.000937367	0.000446121	0.000997557		0.00357337	0.00492068	0	0	0.0011986	0.00268015	0.00108102	0.00241722
63	888.6	C52H90O8PN	PC(44:7)		0.00032	0.000438178	0	0	0	0	0	0		0.000305455	0.00041905	0	0	0	0	0	0		0.000533087	0.000734388	0	0	0	0	0	0		0.00357598	0.00492472	0	0	0	0	0	0
64	890.7	C52H92O8PN	PC(44:6)		0.00112	0.000715542	0.00077	0.000734507	0.00180159	0.0011362	0.00116667	0.00162447		0.00106424	0.000748204	0.000601005	0.000614763	0.000640486	0.000359145	0.000327957	0.000449174		0.00186989	0.0010182	0.00113256	0.00104029	0.00151362	0.000881334	0.0012101	0.00174967		0.0130173	0.00897847	0.00627979	0.00613299	0.0040947	0.00253609	0.0029519	0.00427644
65	892.7	C52H94O8PN	PC(44:5)		0.00096	0.000876356	0.0004	0.000894427	0	0	0	0		0.000875152	0.000797535	0.000285714	0.000638877	0	0	0	0		0.0016903	0.00161002	0.000412134	0.00092156	0	0	0	0		0.0106424	0.00882557	0.00187216	0.00418629	0	0	0	0
66	894.7	C52H96O8PN	PC(44:4)		0.00032	0.000438178	0	0	0.000857143	0.00127775	0.000571429	0.00127775		0.00032	0.000438178	0	0	0.000324362	0.000444318	0.00015873	0.000354931		0.000514467	0.00070607	0	0	0.000837921	0.00120186	0.000394191	0.000881437		0.00371703	0.00509723	0	0	0.00330924	0.00551864	0.00104943	0.00234661
67	896.7	C52H98O8PN	PC(44:3)		0.00176	0.000669328	0.00061	0.000579224	0.000444444	0.000993808	0.0009	0.00124499		0.00167515	0.000735729	0.000465967	0.000427042	0.000164609	0.000368077	0.000335203	0.000459538		0.00304474	0.00112836	0.00095896	0.000944398	0.000419203	0.000937367	0.000742702	0.00105078		0.0201515	0.00798993	0.00422135	0.00395024	0.0011986	0.00268015	0.00205962	0.00282606
68	898.7	C52H100O8PN	PC(44:2)		0.00048	0.000715542	0.00061	0.000579224	0.00446032	0.00105648	0.00624127	0.00420444		0.000450909	0.000659376	0.000465967	0.000427042	0.00160533	0.000551811	0.00193812	0.00119085		0.000822407	0.00127224	0.00095896	0.000944398	0.00386516	0.000856978	0.00535624	0.0030388		0.00521534	0.00752519	0.00422135	0.00395024	0.0114986	0.00173521	0.0141154	0.00727049
69	Total PC				6.57376	0.573517	11.0023	2.89248	22.3981	8.758	24.0307	4.84861		6.1218	0.757351	8.12094	2.3045	7.97177	3.12747	7.87171	2.12519		11.3849	2.1475	15.3955	3.57485	18.9095	4.69514	21.066	2.11531		74.8079	2.46395	74.3055	2.36597	55.1615	2.03614	57.4096	2.04442
70	701.5	C39H77N2O6P	SM(16:1)		0.00330749	0.00235695	0.00679587	0.00365156	0.109429	0.0640692	0.112251	0.0463918		0.00305693	0.00230561	0.0050334	0.00267862	0.0385576	0.020214	0.0363152	0.013372		0.00569442	0.00388296	0.00909906	0.00314237	0.0901901	0.0375541	0.0957755	0.0240455		0.0368509	0.0259097	0.0435184	0.0107249	0.254316	0.0703509	0.260015	0.0538028
71	703.6	C39H79N2O6P	SM(16:0)		0.12155	0.0164338	0.248088	0.0898607	1.61708	0.912408	1.67823	0.605729		0.112862	0.0163055	0.185007	0.0730383	0.574717	0.305794	0.544655	0.189636		0.210698	0.0454814	0.343503	0.10747	1.34209	0.562188	1.44081	0.310203		1.38051	0.12029	1.64369	0.339121	3.78387	1.0361	3.90608	0.600651
72	705.6	C39H81N2O6P	DSM(16:0)		0	0	0.00124031	0.00277342	0.0810262	0.0812747	0.00172265	0.00385197		0	0	0.00112755	0.00252129	0.0295239	0.0291577	0.000430663	0.000962992		0	0	0.00160605	0.00359123	0.064889	0.0564446	0.00197409	0.00441421		0	0	0.00906519	0.0202704	0.177095	0.128359	0.00483433	0.0108099
73	729.6	C41H81N2O6P	SM(18:1)		0.00330749	0.00184895	0.000645995	0.00144449	0.0429433	0.0261253	0.018539	0.0353857		0.00301934	0.00170543	0.000403747	0.000902805	0.0157693	0.0109191	0.00533202	0.00979233		0.00574499	0.00340264	0.000945476	0.00211415	0.0360653	0.0191172	0.013619	0.0242736		0.038055	0.0215021	0.00658685	0.0147286	0.102736	0.0374199	0.0369197	0.0645866
74	731.6	C41H83N2O6P	SM(18:0)		0	0	0	0	0	0	0	0		0	0	0	0	0	0	0	0		0	0	0	0	0	0	0	0		0	0	0	0	0	0	0	0
75	733.6	C41H85N2O6P	DSM(18:0)		0	0	0	0	0	0	0	0		0	0	0	0	0	0	0	0		0	0	0	0	0	0	0	0		0	0	0	0	0	0	0	0
76	785.6	C45H89N2O6P	SM(22:1)		0	0	0	0	0	0	0	0		0	0	0	0	0	0	0	0		0	0	0	0	0	0	0	0		0	0	0	0	0	0	0	0
77	787.7	C45H91N2O6P	SM(22:0)		0	0	0	0	0	0	0	0		0	0	0	0	0	0	0	0		0	0	0	0	0	0	0	0		0	0	0	0	0	0	0	0
78	789.7	C45H93N2O6P	DSM(22:0)		0.0504393	0.0234149	0.0223514	0.0202723	0	0	0.0465116	0.104003		0.0458414	0.0185885	0.0168565	0.0152976	0	0	0.0150038	0.0335494		0.0859413	0.0350826	0.0358956	0.0355873	0	0	0.0414996	0.092796		0.569482	0.258752	0.158911	0.135373	0	0	0.10056	0.224858
79	813.7	C47H93N2O6P	SM(24:1)		0.078553	0.0207749	0.116253	0.0546544	0.328801	0.184835	0.316181	0.0963307		0.07336	0.0205997	0.0869772	0.0430913	0.117105	0.0651972	0.101583	0.0278847		0.135811	0.0415065	0.157358	0.0545772	0.273971	0.120976	0.275724	0.0582529		0.888764	0.188128	0.754263	0.213447	0.781052	0.238769	0.743436	0.081564
80	815.7	C47H95N2O6P	SM(24:0)		0	0	0.00322997	0.00559448	0.092244	0.0924121	0.0923096	0.0717579		0	0	0.00224945	0.00399814	0.0326794	0.028713	0.0306876	0.0249504		0	0	0.00360784	0.00579807	0.0722161	0.0540691	0.0748476	0.0573074		0	0	0.0186809	0.0273699	0.19734	0.116962	0.201647	0.149027
81	817.7	C47H97N2O6P	DSM(24:0)		0.00702842	0.00313504	0.0115245	0.00802772	0.0151758	0.0287665	0.0180879	0.0251855		0.00656487	0.00305452	0.00901985	0.00737175	0.0046874	0.00821276	0.00537171	0.00738462		0.0115506	0.00450257	0.0167018	0.0114056	0.00987071	0.0169235	0.0140467	0.0192379		0.0799236	0.0369236	0.0804978	0.0582359	0.0249619	0.0421705	0.0357419	0.0490991
82	Total SM and DSM				0.264186	0.0448012	0.410129	0.14863	2.2867	1.361	2.28384	0.890563		0.244704	0.0378319	0.306675	0.123161	0.81304	0.45718	0.739379	0.273493		0.455441	0.0973377	0.568716	0.18153	1.88929	0.82672	1.9583	0.516046		2.99358	0.317942	2.71522	0.592145	5.32137	1.50783	5.28923	1.01337
83	714.5	C40H76O7PN	ePC(32:3)		0.00512	0.00165892	0.00771	0.00559871	0.00860317	0.00690102	0.00776984	0.00383182		0.00477576	0.00165613	0.0055545	0.0039162	0.00289525	0.00189409	0.00263633	0.00152433		0.00865233	0.00239741	0.0100631	0.00538685	0.00676389	0.00371139	0.0065945	0.00288579		0.0587002	0.0192114	0.0489225	0.0223923	0.0190932	0.00813611	0.0180615	0.0074397
84	716.6	C40H78O7PN	ePC(32:2)		0.00544	0.00104307	0.01259	0.00439352	0.0787619	0.0323277	0.0601889	0.0275932		0.00506424	0.00107464	0.0093634	0.00348025	0.0279824	0.0115914	0.0199705	0.0090209		0.00925061	0.00145176	0.0177185	0.00642917	0.0663657	0.0159587	0.0505342	0.0154406		0.061936	0.0114046	0.0834455	0.0144118	0.202505	0.0646711	0.139725	0.0449252
85	718.6	C40H80O7PN	ePC(32:1)		0.1	0.00669328	0.16866	0.0449516	0.991841	0.395342	0.995702	0.237085		0.0930109	0.00917158	0.124268	0.0348277	0.353085	0.141895	0.325894	0.0944686		0.17177	0.0199674	0.236054	0.0559091	0.835706	0.20044	0.867692	0.0903319		1.14002	0.0613541	1.13897	0.0532259	2.44723	0.0405611	2.36499	0.112697
86	720.6	C40H82O7PN	ePC(32:0)		0.06272	0.00322986	0.06153	0.0189926	0.725976	0.319108	1.06647	0.231662		0.0584073	0.00611517	0.0455958	0.0154537	0.256103	0.102691	0.349117	0.0976327		0.108692	0.019941	0.0850298	0.0186722	0.606943	0.157741	0.932876	0.100914		0.715825	0.0429347	0.412785	0.0437537	1.76641	0.102278	2.54054	0.0819663
87	740.6	C42H78O7PN	ePC(34:4)		0.00048	0.000438178	0.00086	0.000516478	0.00344444	0.00339586	0.00134444	0.00124002		0.000450909	0.000412691	0.000622217	0.00034988	0.00112326	0.000930989	0.000493934	0.000451812		0.000904154	0.000836339	0.00132486	0.000827099	0.00263282	0.00209194	0.00120992	0.00115243		0.00535378	0.00491501	0.00677046	0.00460353	0.00708246	0.00564346	0.0034317	0.00321475
88	742.6	C42H80O7PN	ePC(34:3)		0.00416	0.00104307	0.00772	0.00236474	0.049246	0.019487	0.0339651	0.00946789		0.00386909	0.00105317	0.00563586	0.00159713	0.0175939	0.00731208	0.0113243	0.00415165		0.00709971	0.00163223	0.0109888	0.00395118	0.0415577	0.00964756	0.0293127	0.00394622		0.0472642	0.0109782	0.0521587	0.00963616	0.123681	0.0202642	0.0809531	0.0160108
89	744.6	C42H82O7PN	ePC(34:2)		0.06752	0.00871963	0.11521	0.029196	0.57627	0.216654	0.465908	0.12903		0.0627418	0.00895076	0.0852494	0.0243943	0.204914	0.0791342	0.153618	0.0502442		0.116262	0.0202463	0.161718	0.0394977	0.486259	0.0974512	0.402838	0.047499		0.766782	0.0570084	0.780013	0.0427653	1.45391	0.234132	1.10501	0.153772
90	746.6	C42H84O7PN	ePC(34:1)		0.44848	0.0372949	0.59855	0.17373	3.37991	1.41475	3.56127	0.751452		0.41768	0.0521338	0.443074	0.140517	1.20321	0.499755	1.16821	0.325408		0.77282	0.116911	0.83134	0.18387	2.84215	0.737359	3.11552	0.29282		5.10576	0.211837	4.02084	0.240168	8.27512	0.187478	8.50006	0.444831
91	748.6	C42H86O7PN	ePC(34:0)		0.0312	0.00637495	0.02623	0.0115824	0.393198	0.184924	0.490135	0.119607		0.0289479	0.00606808	0.0190743	0.00817606	0.138504	0.0582474	0.160785	0.0481167		0.0544752	0.0157926	0.0367044	0.0146946	0.32722	0.0907626	0.426514	0.0453375		0.353328	0.0552245	0.172717	0.0412749	0.94887	0.0707443	1.16351	0.0771311
92	766.6	C44H80O7PN	ePC(36:5)		0.0024	0.00126491	0.00534	0.00276188	0.0544603	0.0221962	0.0354111	0.00738571		0.00227152	0.00126774	0.00401468	0.00231572	0.0196564	0.0091366	0.0118645	0.00455044		0.00426515	0.00236043	0.00703868	0.00237862	0.0461121	0.0129338	0.0309209	0.00228312		0.0269884	0.0133869	0.0366416	0.0168912	0.135424	0.0177714	0.0852407	0.013982
93	768.6	C44H82O7PN	ePC(36:4)		0.00352	0.00091214	0.00597	0.000744648	0.13346	0.0593101	0.0941238	0.0175467		0.00324121	0.000722489	0.00438918	0.00075245	0.0475145	0.0211063	0.0311076	0.00999208		0.0060718	0.00180135	0.00843395	0.00142795	0.111792	0.0297816	0.0824893	0.00587094		0.0399282	0.00872574	0.0424755	0.0125987	0.327779	0.0323012	0.226081	0.0231719
94	770.6	C44H84O7PN	ePC(36:3)		0.02624	0.00428579	0.04849	0.012697	0.227024	0.0890544	0.173478	0.047796		0.0244121	0.00431134	0.0362252	0.0118286	0.081003	0.0332536	0.0574979	0.0206366		0.0450451	0.0086174	0.0680111	0.0174523	0.191506	0.0447582	0.1496	0.0116678		0.297541	0.0307343	0.327449	0.0355019	0.563993	0.0412335	0.41194	0.0608267
95	772.6	C44H86O7PN	ePC(36:2)		0.18512	0.0132012	0.29362	0.0807848	0.988754	0.386602	0.853629	0.163349		0.172058	0.0156712	0.216022	0.0610986	0.355233	0.151908	0.278962	0.0699881		0.320138	0.0559477	0.411107	0.101226	0.837158	0.215976	0.751845	0.0999564		2.10795	0.0272362	1.98049	0.108587	2.44866	0.151994	2.04309	0.0885709
96	774.6	C44H88O7PN	ePC(36:1)		0.12064	0.00782611	0.14479	0.0361562	1.18237	0.496651	1.15287	0.261987		0.112136	0.00983565	0.106351	0.0272575	0.418784	0.167563	0.377485	0.107867		0.208062	0.0316046	0.203	0.0461003	0.992081	0.247428	1.00635	0.102797		1.3743	0.0299377	0.983402	0.0753813	2.89524	0.0869339	2.74267	0.111259
97	776.6	C44H90O7PN	ePC(36:0)		0.00832	0.00165892	0.01046	0.00897228	0.067	0.0313164	0.0801635	0.0218996		0.0076703	0.00106289	0.00760652	0.00643588	0.0236207	0.00993001	0.026443	0.00906296		0.0141465	0.00191815	0.0132078	0.00909737	0.0559557	0.0172955	0.0692147	0.00562086		0.0951409	0.0204088	0.0653437	0.0392729	0.160891	0.0236724	0.189883	0.0220972
98	792.6	C46H82O7PN	ePC(38:6)		0.00592	0.00133866	0.00859	0.00333399	0.109405	0.0361695	0.0708952	0.0103911		0.00551758	0.00143396	0.00633153	0.00245281	0.0396074	0.0165236	0.0237014	0.00808866		0.0101351	0.00224351	0.0118279	0.00328337	0.093669	0.0235762	0.0625951	0.00611651		0.0673327	0.0140348	0.0565817	0.00570428	0.275064	0.0244812	0.172672	0.0307346
99	794.6	C46H84O7PN	ePC(38:5)		0.01392	0.00107331	0.0249	0.00709886	0.190222	0.0672898	0.128184	0.0322594		0.0129552	0.00142409	0.0183905	0.00575355	0.0685391	0.0286133	0.0423016	0.0150496		0.0242701	0.00564002	0.0343168	0.00481128	0.162026	0.0404765	0.111536	0.0164579		0.158947	0.0147951	0.168725	0.0173213	0.474807	0.0279779	0.304154	0.0372514
100	796.6	C46H86O7PN	ePC(38:4)		0.028	0.00502792	0.04115	0.0146219	0.0996667	0.029716	0.0751587	0.00977899		0.0262085	0.00605285	0.0304733	0.011192	0.0367912	0.0176273	0.0248032	0.00671749		0.0484616	0.01128	0.0572233	0.0171779	0.086687	0.0274156	0.0664661	0.00618291		0.317956	0.0454265	0.272113	0.0281113	0.252696	0.0372718	0.182188	0.0218798
101	798.6	C46H88O7PN	ePC(38:3)		0.02736	0.00199198	0.03857	0.00897215	0.0649683	0.0259754	0.0519524	0.0123447		0.0253818	0.00171334	0.0281446	0.00602475	0.0228579	0.00839281	0.0168883	0.00437079		0.0472086	0.00775691	0.0547127	0.0151722	0.0544587	0.0112153	0.0454256	0.00563913		0.312699	0.0307319	0.264629	0.0420859	0.161093	0.0121839	0.123502	0.00460932
102	800.6	C46H90O7PN	ePC(38:2)		0.0368	0.0016	0.04417	0.0124983	0.154357	0.062835	0.143078	0.0322211		0.0342594	0.00326722	0.032287	0.00878509	0.054497	0.0206884	0.0473774	0.0162006		0.0636164	0.0104408	0.0619258	0.0158145	0.129756	0.0326194	0.124472	0.00783203		0.42006	0.0241041	0.298959	0.033656	0.378644	0.0294736	0.341273	0.0351085
103	802.7	C46H92O7PN	ePC(38:1)		0.01392	0.00364856	0.01757	0.00500744	0.124413	0.0441456	0.130175	0.0296812		0.0128364	0.00293466	0.012956	0.00408859	0.0441199	0.0157495	0.0425005	0.0117178		0.0237144	0.00592395	0.0240796	0.00214899	0.105203	0.0207461	0.113809	0.0137661		0.157842	0.0358722	0.12033	0.0233485	0.311378	0.0204392	0.309514	0.00835241
104	804.7	C46H94O7PN	ePC(38:0)	PC(38:7)	0.0048	0.0024	0.00163	0.00103537	0.0323095	0.00918736	0.0417937	0.0111365		0.00445818	0.00217447	0.00123364	0.000852349	0.0115817	0.0040525	0.0139994	0.00567631		0.0080653	0.00378431	0.002491	0.00160853	0.0277263	0.00584357	0.0365589	0.00750668		0.0559456	0.0283702	0.0121612	0.00707069	0.0821227	0.0086766	0.100036	0.0198436
105	820.6	C48H86O7PN	ePC(40:6)		0.01216	0.00229085	0.02108	0.00996686	0.0845873	0.0339726	0.0587857	0.00937699		0.0113745	0.0026536	0.01548	0.00722694	0.0300368	0.0118592	0.0193608	0.00513348		0.0213156	0.00642218	0.0283439	0.00790348	0.0711695	0.0158446	0.0518141	0.00491425		0.138716	0.0262395	0.138215	0.0285527	0.211705	0.0320758	0.141742	0.0143331
106	822.6	C48H88O7PN	ePC(40:5)		0.00496	0.00173436	0.00637	0.00338519	0.0747143	0.0259984	0.0516841	0.00714838		0.00466667	0.00190307	0.00495299	0.0030885	0.0266918	0.0104587	0.0170951	0.00492216		0.00841993	0.00242805	0.00906316	0.00534683	0.0634348	0.0139179	0.0457249	0.00512409		0.0570427	0.022316	0.0423017	0.023649	0.187966	0.0206711	0.125016	0.0132983
107	824.6	C48H90O7PN	ePC(40:4)		0.00688	0.00107331	0.0079	0.0026256	0.0180714	0.00422275	0.0145889	0.00351092		0.00635394	0.000619985	0.00589216	0.00214652	0.00659316	0.00259619	0.00476918	0.00147046		0.0117621	0.00160065	0.011051	0.00351203	0.0157635	0.00408807	0.0127546	0.00173019		0.0787135	0.0138946	0.0523938	0.00838948	0.0466798	0.00772447	0.0349239	0.0047452
108	826.7	C48H92O7PN	ePC(40:3)		0.0064	0.00169706	0.00541	0.00259865	0.0145238	0.00522726	0.0121841	0.00434494		0.00599758	0.00187512	0.00404786	0.00200794	0.00514726	0.00184819	0.00411583	0.00195571		0.0108385	0.00251275	0.00749403	0.00335986	0.0122806	0.00258799	0.0103863	0.00197577		0.0726917	0.0180601	0.0352627	0.0103793	0.0362066	0.00198541	0.0290517	0.00862462
109	828.7	C48H94O7PN	ePC(40:2)		0.00736	0.002555	0.00678	0.00191983	0.0301032	0.0122924	0.0331381	0.00704521		0.00683879	0.00233701	0.00501883	0.00150631	0.010634	0.00415948	0.010821	0.0027975		0.0123186	0.00320483	0.00966613	0.00343162	0.0252309	0.00528792	0.0290684	0.00358307		0.0847832	0.030835	0.0458549	0.00848286	0.0749574	0.00885469	0.0790464	0.00288468
110	Total ePC				1.23984	0.0880353	1.73185	0.484449	9.85767	4.00317	9.88403	2.16005		1.15359	0.122114	1.27825	0.380751	3.50832	1.42519	3.24314	0.927833		2.13778	0.322827	2.41394	0.545752	8.29761	2.02938	8.63412	0.804899		14.1196	0.348565	11.66	0.365287	24.2692	0.378188	23.5583	1.21606
111	452.3	C21H42O7PN	LPE(16:1)		0.03456	0.0596775	0.01376	0.0156975	0.0268651	0.0135825	0.0321413	0.0123277		0.0335127	0.0598887	0.0102245	0.0112905	0.00949914	0.00431622	0.0103577	0.00391963		0.0527555	0.0906743	0.0165195	0.0150732	0.0224517	0.00852312	0.0276582	0.00711502		0.414422	0.723321	0.0826641	0.068455	0.0636056	0.0170701	0.0752319	0.0171443
112	454.3	C21H44O7PN	LPE(16:0)		0.00256	0.00273642	0.01104	0.00824063	0.0216508	0.00942315	0.0165079	0.00598667		0.0023103	0.00245127	0.00826501	0.00624811	0.0072168	0.00206583	0.00537417	0.00222335		0.00473735	0.00565931	0.0142101	0.00951238	0.0180944	0.00598977	0.0155879	0.00783864		0.0300816	0.0328666	0.0784891	0.0610434	0.0579644	0.0305446	0.0421861	0.0217539
113	476.3	C23H42O7PN	LPE(18:3)		0.00864	0.0107837	0.0187	0.025743	0.00633333	0.00427114	0.00907619	0.00629793		0.00782545	0.00943531	0.0144364	0.019042	0.00195628	0.00126524	0.00332431	0.00293614		0.0130098	0.015836	0.021404	0.026865	0.00505647	0.00309665	0.00791715	0.00527283		0.101323	0.126753	0.106368	0.127728	0.017208	0.0137511	0.0231717	0.0177727
114	478.3	C23H44O7PN	LPE(18:2)		0.00288	0.00514121	0.00624	0.00618419	0.0163254	0.00957409	0.0163825	0.00884427		0.00245091	0.00426383	0.00498147	0.00558271	0.00563592	0.00267114	0.00488887	0.00187103		0.00444855	0.0074754	0.00784657	0.00746521	0.0133236	0.00505208	0.0151468	0.0098267		0.0336096	0.0594721	0.0422789	0.0423507	0.0379391	0.00942262	0.0393538	0.022466
115	480.3	C23H46O7PN	LPE(18:1)		0.02768	0.0165756	0.07267	0.0485087	0.185183	0.0772335	0.19583	0.0778949		0.0249406	0.0132127	0.0533644	0.0346962	0.0653477	0.025092	0.060156	0.0140636		0.0480063	0.0292573	0.0955125	0.040641	0.15531	0.0383863	0.180705	0.0958939		0.32009	0.199409	0.462146	0.162772	0.453401	0.0258117	0.474453	0.207098
116	500.3	C25H42O7PN	LPE(20:5)		0.00112	0.00165892	0.00129	0.00136766	0.0117143	0.00657764	0.0129746	0.00703228		0.000972121	0.00137431	0.0010342	0.00120936	0.00404751	0.00221655	0.00391081	0.00156673		0.00170526	0.00241807	0.00164033	0.00172858	0.00987591	0.00539951	0.0125306	0.00889396		0.0128443	0.0192589	0.00820989	0.00957234	0.0291736	0.0145412	0.0325976	0.020853
117	502.3	C25H44O7PN	LPE(20:4)		0.00368	0.00535462	0.00573	0.00731023	0.0580238	0.0234659	0.0668111	0.0316142		0.00322424	0.00446975	0.00463157	0.00614307	0.0208786	0.00915117	0.020292	0.00600939		0.00554842	0.00779942	0.00677402	0.00867469	0.0492671	0.0152446	0.062	0.0387611		0.0426205	0.0622921	0.0357676	0.0462194	0.141522	0.0173818	0.162041	0.0865565
118	504.3	C25H46O7PN	LPE(20:3)		0.00496	0.00432296	0.01375	0.0112389	0.0136429	0.00825456	0.0155349	0.00831678		0.00445818	0.00384042	0.00985823	0.00800004	0.00514451	0.00341723	0.0047785	0.00168709		0.00916787	0.00913972	0.0181396	0.0108601	0.0118366	0.00745488	0.0147257	0.0110189		0.0574382	0.0527568	0.0868454	0.0473225	0.0315607	0.0200535	0.0388502	0.0253717
119	506.3	C25H48O7PN	LPE(20:2)		0.01696	0.0259871	0.03187	0.0310334	0.00956349	0.00441476	0.0107905	0.00372002		0.0146061	0.0214103	0.0237856	0.0226471	0.00339041	0.00146958	0.00343324	0.00102979		0.026615	0.0374205	0.0391628	0.0288111	0.00798134	0.00210515	0.00952759	0.00308167		0.196742	0.30126	0.196013	0.133107	0.0234309	0.00264118	0.0253766	0.00534794
120	508.3	C25H50O7PN	LPE(20:1)		0.00976	0.0112769	0.02366	0.0108664	0.0791825	0.0362468	0.0820381	0.0334162		0.00855515	0.00918432	0.0176197	0.00850401	0.0280162	0.0118047	0.0252379	0.0056861		0.0158367	0.0161658	0.0316875	0.00764987	0.0661673	0.0189318	0.0753171	0.0413703		0.113083	0.13113	0.157621	0.0403745	0.191147	0.0167833	0.198702	0.0904897
121	510.3	C25H52O7PN	LPE(20:0)		0.00128	0.00175271	0.00137	0.0024258	0.00107143	0.00147254	0.000888889	0.00198762		0.00117333	0.00161768	0.00118485	0.00221317	0.000317147	0.000434987	0.00031746	0.000709863		0.0019128	0.00262005	0.00184974	0.00314099	0.000776647	0.00107571	0.00093444	0.00208947		0.0151611	0.0207685	0.00984595	0.017744	0.00213242	0.00301362	0.00274414	0.00613609
122	526.3	C27H44O7PN	LPE(22:6)		0.012	0.0123806	0.0172	0.0220613	0.0757143	0.0288911	0.0892317	0.0375477		0.0109939	0.0110279	0.0131754	0.0162824	0.0270628	0.0107402	0.0275388	0.00608689		0.0183722	0.0180431	0.0200098	0.0226332	0.0641683	0.0167041	0.0844997	0.052626		0.139763	0.147168	0.100459	0.106323	0.187127	0.0161216	0.223444	0.119568
123	528.3	C27H46O7PN	LPE(22:5)		0.00032	0.000438178	0.00272	0.00381995	0.061127	0.0286833	0.0637762	0.0407882		0.000305455	0.00041905	0.00216104	0.00296732	0.0220576	0.0107487	0.0190443	0.00854005		0.000560019	0.000767544	0.0030988	0.00425766	0.0514693	0.0175794	0.0606629	0.0509404		0.00341978	0.00468936	0.0156745	0.0214986	0.146655	0.0199655	0.157228	0.118335
124	Total LysoPE				0.1264	0.106946	0.22	0.180331	0.566397	0.237776	0.611984	0.235445		0.115328	0.0946726	0.164722	0.133379	0.200571	0.0792784	0.188654	0.0367178		0.202676	0.149982	0.277855	0.159908	0.475778	0.124966	0.567213	0.30946		1.4806	1.27179	1.38238	0.746344	1.38287	0.0981502	1.49538	0.675121
125	634.4	C33H64O8PN	PE(28:1)		0.0008	0	0.00097	0.000595399	0.000285714	0.000638877	0.00141587	0.00133023		0.000744242	5.65945e-05	0.000743862	0.000515101	0.00015873	0.000354931	0.000491373	0.00044963		0.00138236	0.000218138	0.00133863	0.000843251	0.000317769	0.000710553	0.00115799	0.00109958		0.00914406	0.000620165	0.00721587	0.00522482	0.000763682	0.00170765	0.00340012	0.00319121
126	636.5	C33H66O8PN	PE(28:0)		0.0016	0.0008	0.00153	0.00118512	0.0020873	0.00119694	0.00147143	0.00137729		0.00147636	0.000732526	0.00118545	0.000950249	0.000799216	0.000561908	0.000493934	0.000451812		0.00268289	0.00117408	0.00199152	0.00127219	0.00183139	0.00115819	0.00113689	0.00107199		0.0186586	0.00995896	0.00936842	0.00677016	0.00485839	0.0029699	0.00310906	0.00284422
127	662.5	C35H68O8PN	PE(30:1)		0.00016	0.000357771	0.0002	0.000447214	0.000571429	0.00127775	0.0004	0.000894427		0.000145455	0.000325246	0.000153846	0.00034401	0.000165631	0.000370363	0.000173913	0.000388881		0.000344135	0.000769509	0.000352301	0.000787769	0.000342555	0.000765975	0.000296581	0.000663175		0.001934	0.00432457	0.00139186	0.0031123	0.000855333	0.00191258	0.000978609	0.00218824
128	664.5	C35H70O8PN	PE(30:0)		0.00016	0.000357771	0.00052	0.000742967	0.00294444	0.00079583	0.00365397	0.00165416		0.000145455	0.000325246	0.000444755	0.000655435	0.00112358	0.000703529	0.00113935	0.00042156		0.00028932	0.000646939	0.000766661	0.00105551	0.00266931	0.00121404	0.0032084	0.00124697		0.00163936	0.00366573	0.00373068	0.00537573	0.00816763	0.00369622	0.00848247	0.00253679
129	688.5	C37H70O8PN	PE(32:2)		0.00032	0.000438178	0.00271	0.00133529	0.0025873	0.00178845	0.00320952	0.00230537		0.000305455	0.00041905	0.00210956	0.00137336	0.000950731	0.000644013	0.000980621	0.000663982		0.000533087	0.000734388	0.00387698	0.00193355	0.00226548	0.00162836	0.00274118	0.00191449		0.00357598	0.00492472	0.0189335	0.00999916	0.00613548	0.00467447	0.00711039	0.00462735
130	690.5	C37H72O8PN	PE(32:1)		0.00528	0.00262907	0.02309	0.00759789	0.0675	0.0259636	0.0707095	0.0213906		0.00478303	0.00207467	0.0174255	0.00711948	0.024175	0.0100697	0.0221277	0.0031075		0.00898813	0.00403148	0.032097	0.0093295	0.0570819	0.0134966	0.0644412	0.0277576		0.0595266	0.0286447	0.154903	0.0316014	0.168406	0.0163499	0.171346	0.0571949
131	692.5	C37H74O8PN	PE(32:0)		0.00112	0.000715542	0.00384	0.00291599	0.00820635	0.00276391	0.00700317	0.00360556		0.00107636	0.00070211	0.00282106	0.00209664	0.00306637	0.00163571	0.00211273	0.000905869		0.00195171	0.00117851	0.00491868	0.0024469	0.0071799	0.00269589	0.00649	0.00385105		0.0126468	0.00797792	0.0243045	0.0110339	0.0212068	0.00600348	0.0168078	0.0086959
132	712.5	C39H70O8PN	PE(34:4)		0	0	0.0002	0.000447214	0	0	0	0		0	0	0.000142857	0.000319438	0	0	0	0		0	0	0.000206067	0.00046078	0	0	0	0		0	0	0.000936082	0.00209314	0	0	0	0
133	714.5	C39H72O8PN	PE(34:3)		0.00016	0.000357771	0.00092	0.00135351	0.00310317	0.000765575	0.0021381	0.00129104		0.000133333	0.000298142	0.000719481	0.0010148	0.00112946	0.000446204	0.0006606	0.000370429		0.000234434	0.00052421	0.00103256	0.00145909	0.00277074	0.000961016	0.00190087	0.00137697		0.00185367	0.00414493	0.00514707	0.0070966	0.00860254	0.00364097	0.00497995	0.00332399
134	716.5	C39H74O8PN	PE(34:2)		0.01696	0.00558283	0.06445	0.0345599	0.1045	0.0349668	0.0952317	0.0281413		0.0155539	0.00442518	0.0485717	0.0271627	0.0377168	0.0163393	0.0299232	0.00526748		0.0292194	0.0102804	0.0862706	0.0314448	0.0893325	0.0217933	0.0855214	0.0294037		0.19152	0.0533124	0.416114	0.126825	0.269981	0.0714617	0.227563	0.0545109
135	718.5	C39H76O8PN	PE(34:1)		0.04144	0.00995028	0.13942	0.055013	0.646365	0.215282	0.679675	0.240366		0.038177	0.00771533	0.10373	0.0430908	0.233351	0.0990127	0.210901	0.0411625		0.0712518	0.0176579	0.191638	0.0553344	0.552025	0.13004	0.612675	0.255063		0.469154	0.095514	0.921803	0.137048	1.64542	0.281716	1.62488	0.523368
136	720.5	C39H78O8PN	PE(34:0)		0.00064	0.000876356	0.0035	0.00535899	0.000444444	0.000993808	0.0008	0.00178885		0.000581818	0.000796687	0.00248775	0.003839	0.000164609	0.000368077	0.000347826	0.000777763		0.00126691	0.00174558	0.00414885	0.00531724	0.000419203	0.000937367	0.000593162	0.00132635		0.00714674	0.00984136	0.019162	0.0239339	0.0011986	0.00268015	0.00195722	0.00437647
137	736.5	C41H70O8PN	PE(36:6)		0	0	0.0002	0.000447214	0.00215873	0.00123769	0.0021381	0.00129104		0	0	0.000142857	0.000319438	0.000813332	0.000561487	0.0006606	0.000370429		0	0	0.000206067	0.00046078	0.00191745	0.00120473	0.00190087	0.00137697		0	0	0.000936082	0.00209314	0.00612685	0.00465918	0.00497995	0.00332399
138	738.5	C41H72O8PN	PE(36:5)		0	0	0.0002	0.000447214	0.0121508	0.00314074	0.0091127	0.00443441		0	0	0.000142857	0.000319438	0.00434115	0.00143447	0.00278339	0.000908296		0	0	0.000206067	0.00046078	0.0104244	0.00175435	0.0081894	0.00451799		0	0	0.000936082	0.00209314	0.0312566	0.00452558	0.0216537	0.0101323
139	740.5	C41H74O8PN	PE(36:4)		0.00192	0.000438178	0.00612	0.00365335	0.0506587	0.0151715	0.0501159	0.014159		0.00176727	0.000308127	0.00474294	0.00321051	0.0185122	0.00842992	0.0157339	0.00186109		0.00328846	0.000748771	0.0081914	0.00406941	0.0437236	0.0117683	0.0455385	0.0182693		0.0217812	0.00423636	0.0401633	0.0207194	0.130362	0.0266822	0.121591	0.0375631
140	742.5	C41H76O8PN	PE(36:3)		0.01248	0.0033752	0.04397	0.0253257	0.0488889	0.013095	0.0429746	0.0100519		0.0114255	0.00230076	0.0327919	0.0188896	0.0175729	0.00642411	0.0136058	0.0014978		0.0215678	0.0066097	0.0585674	0.0220549	0.0419797	0.00757141	0.0389322	0.0135344		0.142654	0.0398226	0.281989	0.0825157	0.127392	0.0304078	0.104128	0.0260704
141	744.5	C41H78O8PN	PE(36:2)		0.0784	0.0271411	0.21973	0.0990106	0.512857	0.178629	0.443635	0.14		0.071503	0.019261	0.163947	0.0763697	0.184636	0.0782402	0.138481	0.0238588		0.133838	0.0412965	0.300439	0.100894	0.436848	0.101805	0.401313	0.157764		0.891083	0.301248	1.43384	0.288607	1.31265	0.293381	1.06425	0.311638
142	746.6	C41H80O8PN	PE(36:1)		0.03024	0.0108281	0.08623	0.0375601	0.497317	0.159813	0.467673	0.147042		0.0276412	0.00865088	0.0641688	0.0288575	0.179734	0.0755403	0.146236	0.0247663		0.0524575	0.0197178	0.11805	0.0377767	0.425625	0.0984355	0.42063	0.156861		0.341308	0.112061	0.565997	0.103995	1.27725	0.270658	1.11911	0.307777
143	748.6	C41H82O8PN	PE(36:0)	ePE(38:7)	0	0	0.0002	0.000447214	0.00171429	0.00255551	0	0		0	0	0.000142857	0.000319438	0.000648723	0.000888636	0	0		0	0	0.000206067	0.00046078	0.00132065	0.00181049	0	0		0	0	0.000936082	0.00209314	0.00323803	0.00444568	0	0
144	764.5	C43H74O8PN	PE(38:6)		0.00048	0.000715542	0.00045	0.000622495	0.0508889	0.0117844	0.0432286	0.0128288		0.000436364	0.000650493	0.000309524	0.000425918	0.0184826	0.00729729	0.0136058	0.00245412		0.000922775	0.00132983	0.000605546	0.000896904	0.0441244	0.0098105	0.0387861	0.0141503		0.00521273	0.00752326	0.00259616	0.00377832	0.132154	0.0240777	0.103482	0.0275392
145	766.5	C43H76O8PN	PE(38:5)		0.00288	0.00192666	0.00633	0.0045257	0.126595	0.0431347	0.10983	0.0318989		0.00260121	0.00167013	0.00473495	0.00334725	0.0459749	0.0204697	0.034395	0.00438993		0.00501498	0.00341318	0.00820054	0.00400499	0.10843	0.0283127	0.100167	0.0416708		0.0320433	0.0197371	0.0403872	0.0178497	0.323952	0.0699849	0.266217	0.0846619
146	768.5	C43H78O8PN	PE(38:4)		0.024	0.0103692	0.05652	0.0249917	0.223667	0.0613611	0.188121	0.0576891		0.0218182	0.00793178	0.0423687	0.0198766	0.0813371	0.034295	0.0588325	0.00875036		0.0408215	0.0156623	0.0772299	0.0255302	0.193052	0.0455181	0.171521	0.0744636		0.271265	0.112552	0.370049	0.0799552	0.58054	0.130089	0.455454	0.152899
147	770.6	C43H80O8PN	PE(38:3)		0.03472	0.0151007	0.08225	0.0382851	0.028373	0.00825979	0.0286222	0.00887415		0.03152	0.0112931	0.0609313	0.0284464	0.0104631	0.00519549	0.00900726	0.00178228		0.0589337	0.0221772	0.112519	0.0386992	0.0246823	0.00769382	0.025512	0.00863217		0.393898	0.168059	0.535087	0.103055	0.0741473	0.0209524	0.0681144	0.0163183
148	772.6	C43H82O8PN	PE(38:2)		0.00704	0.00345948	0.02308	0.0112453	0.0462143	0.0139597	0.0386841	0.0136066		0.00666667	0.00335063	0.0171993	0.00856863	0.0167822	0.00723421	0.0120901	0.0027577		0.012418	0.00630672	0.0311059	0.0095015	0.0398142	0.0100202	0.0343945	0.0119877		0.0799078	0.0384702	0.15002	0.0317126	0.121072	0.0366845	0.0915022	0.0230346
149	774.6	C43H84O8PN	PE(38:1)		0.00096	0.00104307	0.00178	0.00174413	0.0159524	0.00266199	0.00979524	0.0067855		0.000887273	0.000946014	0.00138508	0.00136137	0.00578908	0.00217575	0.00294724	0.00183168		0.00185481	0.00219665	0.0028297	0.00296759	0.0139316	0.00290085	0.00854139	0.00617889		0.0110174	0.0122187	0.0123958	0.012144	0.0427334	0.0129979	0.0221211	0.0149199
150	776.6	C43H86O8PN	PE(38:0)	ePE(40:7)	0	0	0.0004	0.000894427	0.0132063	0.00459688	0.00556984	0.00231667		0	0	0.000285714	0.000638877	0.00483247	0.00245218	0.00179201	0.000652721		0	0	0.000412134	0.00092156	0.0113871	0.00369994	0.00481251	0.0015131		0	0	0.00187216	0.00418629	0.0344728	0.0115923	0.0129636	0.00323982
151	788.5	C45H74O8PN	PE(40:8)		0.00048	0.000715542	0.00052	0.000742967	0.00215873	0.00236928	0.00191587	0.00111789		0.000426667	0.000613913	0.000444755	0.000655435	0.000813332	0.000811289	0.000652664	0.000366204		0.000712635	0.00105383	0.000766661	0.00105551	0.00173985	0.00166508	0.00160411	0.000955345		0.00564395	0.00833815	0.00373068	0.00537573	0.00443663	0.00415265	0.00448113	0.00261493
152	790.5	C45H76O8PN	PE(40:7)		0.00112	0.000715542	0.00045	0.000622495	0.0560317	0.0124742	0.0505429	0.016956		0.00103515	0.00064343	0.000309524	0.000425918	0.0199733	0.00638338	0.0156961	0.00270295		0.001961	0.00134708	0.000605546	0.000896904	0.048273	0.007347	0.0459141	0.0196854		0.0124228	0.00680959	0.00259616	0.00377832	0.149993	0.0525691	0.121576	0.04038
153	792.5	C45H78O8PN	PE(40:6)		0.00048	0.000438178	0.00056	0.000876356	0.118389	0.031858	0.111716	0.0382264		0.000424242	0.000388068	0.000453147	0.000683571	0.042859	0.0170907	0.0347132	0.00618418		0.000867889	0.000815659	0.000911782	0.00152709	0.101996	0.0217258	0.101574	0.0458578		0.00542704	0.00498336	0.00395313	0.00611922	0.307904	0.0706149	0.269062	0.0953409
154	794.6	C45H80O8PN	PE(40:5)		0.00352	0.00230478	0.0025	0.00327872	0.0595873	0.0133057	0.0581952	0.0183413		0.00324606	0.00205758	0.00209557	0.00300334	0.0215938	0.00796209	0.0181461	0.00284657		0.00565166	0.00363738	0.00357536	0.00423565	0.0516798	0.0107155	0.0526486	0.0206553		0.0397728	0.0264917	0.017798	0.0240014	0.155855	0.0337011	0.13981	0.0413534
155	796.6	C45H82O8PN	PE(40:4)		0.00336	0.00153883	0.00785	0.00479453	0.0164365	0.00474703	0.0124508	0.00529852		0.00307879	0.00133949	0.00570209	0.00340084	0.00596295	0.00267084	0.00396573	0.00168659		0.00598328	0.00323933	0.0106124	0.00467334	0.0142588	0.00415075	0.01098	0.00526832		0.0377747	0.0154758	0.0504561	0.0169916	0.0444223	0.0194745	0.0295695	0.0126084
156	798.6	C45H84O8PN	PE(40:3)		0.004	0.00178885	0.00772	0.00718841	0.00396032	0.00130059	0.00275397	0.00206342		0.00364121	0.00143322	0.00552706	0.00513088	0.00145382	0.000673379	0.000804147	0.00056146		0.00682896	0.00270228	0.0100969	0.00709043	0.00343107	0.00107716	0.0024657	0.00159411		0.0451768	0.0197745	0.0467512	0.0297005	0.0102216	0.00266529	0.00642284	0.00411253
157	800.6	C45H86O8PN	PE(40:2)		0.00144	0.00199198	0.0049	0.00406817	0.0176667	0.00382586	0.0136048	0.00764355		0.00128485	0.00180927	0.00374192	0.00307472	0.00643781	0.00273231	0.00407422	0.00166203		0.00254892	0.00358144	0.00700641	0.00662512	0.0154299	0.00398069	0.0122594	0.00734412		0.0154775	0.02036	0.0305745	0.0259879	0.0476617	0.0177681	0.0320779	0.0168579
158	812.5	C47H74O8PN	PE(42:10)		0.00016	0.000357771	0.00076	0.000829458	0.000857143	0.00127775	0.00111111	0.00157135		0.00016	0.000357771	0.000585015	0.000602131	0.000324362	0.000444318	0.000325397	0.000445789		0.000243767	0.00054508	0.000971615	0.000962052	0.000837921	0.00120186	0.00123119	0.00176562		0.00193661	0.00433039	0.00443344	0.0042417	0.00330924	0.00551864	0.00324296	0.00452731
159	814.5	C47H76O8PN	PE(42:9)		0.00016	0.000357771	0.00141	0.00152168	0.000285714	0.000638877	0.000444444	0.000993808		0.000145455	0.000325246	0.0010374	0.00107208	0.00015873	0.000354931	0.00015873	0.000354931		0.000344135	0.000769509	0.00178323	0.00152082	0.000317769	0.000710553	0.00046722	0.00104474		0.001934	0.00432457	0.00796568	0.00679625	0.000763682	0.00170765	0.00137207	0.00306805
160	816.5	C47H78O8PN	PE(42:8)		0.00016	0.000357771	0	0	0.00123016	0.00118981	0.00111111	0.00157135		0.00016	0.000357771	0	0	0.000474854	0.0004341	0.000325397	0.000445789		0.000243767	0.00054508	0	0	0.00117107	0.00109221	0.00123119	0.00176562		0.00193661	0.00433039	0	0	0.00323937	0.00311459	0.00324296	0.00452731
161	818.6	C47H80O8PN	PE(42:7)		0.00016	0.000357771	0.00669	0.00927661	0.0081746	0.00663209	0.00523651	0.00238809		0.000133333	0.000298142	0.00519261	0.00697251	0.00275785	0.0018306	0.0016361	0.000560592		0.000234434	0.00052421	0.00759383	0.00991846	0.00641585	0.00323239	0.00468424	0.00219192		0.00185367	0.00414493	0.0385786	0.0476509	0.0190846	0.00811068	0.0126725	0.00519861
162	820.6	C47H82O8PN	PE(42:6)		0.00016	0.000357771	0	0	0.0066746	0.00161201	0.00315397	0.0015178		0.000133333	0.000298142	0	0	0.00240557	0.000949216	0.000978061	0.000341814		0.000234434	0.00052421	0	0	0.0057975	0.00145648	0.00276228	0.00107368		0.00185367	0.00414493	0	0	0.017704	0.00549033	0.00740145	0.00244696
163	822.6	C47H84O8PN	PE(42:5)		0.00016	0.000357771	0.00068	0.00105451	0.00877778	0.00372492	0.00781905	0.00275541		0.00016	0.000357771	0.000579221	0.000947767	0.003232	0.00170725	0.00245543	0.000560822		0.000243767	0.00054508	0.000827608	0.00135044	0.00752246	0.0027519	0.00705233	0.00289871		0.00193661	0.00433039	0.00444431	0.00759669	0.0220621	0.00556168	0.0190245	0.00660187
164	824.6	C47H86O8PN	PE(42:4)		0.00048	0.000715542	0.00245	0.00425881	0.00497619	0.00435493	0.00276032	0.00173707		0.000426667	0.000613913	0.00174908	0.0030418	0.00178406	0.00136003	0.000985307	0.000701819		0.000739567	0.00107157	0.00281245	0.0042925	0.00401523	0.0028852	0.00236791	0.00169194		0.00548775	0.00825043	0.0124128	0.0196059	0.0105853	0.00754385	0.00683181	0.00518182
165	826.6	C47H88O8PN	PE(42:3)		0.00016	0.000357771	0.00116	0.00208038	0	0	0.000571429	0.00127775		0.000145455	0.000325246	0.00102657	0.00189498	0	0	0.00015873	0.000354931		0.000344135	0.000769509	0.00159538	0.00269295	0	0	0.000394191	0.000881437		0.001934	0.00432457	0.00840832	0.0152127	0	0	0.00104943	0.00234661
166	828.6	C47H90O8PN	PE(42:2)		0.00048	0.000438178	0.0012	0.00216795	0.00373016	0.00152868	0.00191587	0.00111789		0.000465455	0.000425936	0.000868132	0.00154746	0.00128199	0.000419611	0.000652664	0.000366204		0.000803787	0.000738208	0.00138264	0.00224077	0.00312819	0.000852227	0.00160411	0.000955345		0.00535639	0.00491787	0.00607227	0.0101455	0.00953637	0.00307317	0.00448113	0.00261493
167	836.5	C49H74O8PN	PE(44:12)		0	0	0	0	0	0	0.0005	0.00111803		0	0	0	0	0	0	0.00016129	0.000360656		0	0	0	0	0	0	0.000446121	0.000997557		0	0	0	0	0	0	0.00108102	0.00241722
168	838.5	C49H76O8PN	PE(44:11)		0.00032	0.000715542	0	0	0	0	0	0		0.000266667	0.000596285	0	0	0	0	0	0		0.000468868	0.00104842	0	0	0	0	0	0		0.00370734	0.00828985	0	0	0	0	0	0
169	840.5	C49H78O8PN	PE(44:10)		0.00032	0.000715542	0	0	0	0	0	0		0.000266667	0.000596285	0	0	0	0	0	0		0.000468868	0.00104842	0	0	0	0	0	0		0.00370734	0.00828985	0	0	0	0	0	0
170	842.6	C49H80O8PN	PE(44:9)		0	0	0.0006	0.00134164	0	0	0	0		0	0	0.000428571	0.000958315	0	0	0	0		0	0	0.000618201	0.00138234	0	0	0	0		0	0	0.00280825	0.00627943	0	0	0	0
171	844.6	C49H82O8PN	PE(44:8)		0.00016	0.000357771	0.00016	0.000357771	0	0	0	0		0.00016	0.000357771	0.000145455	0.000325246	0	0	0	0		0.000243767	0.00054508	0.00020718	0.000463269	0	0	0	0		0.00193661	0.00433039	0.00116941	0.00261488	0	0	0	0
172	846.6	C49H84O8PN	PE(44:7)		0.00032	0.000715542	0.00048	0.00107331	0.00130159	0.00129148	0	0		0.000266667	0.000596285	0.000436364	0.000975739	0.000488971	0.000446561	0	0		0.000468868	0.00104842	0.000621541	0.00138981	0.00125712	0.00120207	0	0		0.00370734	0.00828985	0.00350823	0.00784464	0.00450784	0.00526521	0	0
173	848.6	C49H86O8PN	PE(44:6)		0.00016	0.000357771	0	0	0.000857143	0.00127775	0.0004	0.000894427		0.000133333	0.000298142	0	0	0.000324362	0.000444318	0.000173913	0.000388881		0.000234434	0.00052421	0	0	0.000660324	0.000905246	0.000296581	0.000663175		0.00185367	0.00414493	0	0	0.00161901	0.00222284	0.000978609	0.00218824
174	850.6	C49H88O8PN	PE(44:5)		0	0	0.00076	0.00129923	0.00290476	0.00297571	0.00270952	0.00208006		0	0	0.000574026	0.000931831	0.00111432	0.00108436	0.00081933	0.000562132		0	0	0.000825382	0.00134361	0.00276133	0.00275482	0.00229506	0.00165591		0	0	0.00397766	0.00616919	0.00767734	0.00790495	0.00602938	0.0041541
175	852.6	C49H90O8PN	PE(44:4)		0	0	0.001	0.00223607	0.00446032	0.00105648	0.00483651	0.00278199		0	0	0.000714286	0.00159719	0.00160533	0.000551811	0.00146219	0.000648611		0	0	0.00103034	0.0023039	0.00386516	0.000856978	0.00438766	0.00255312		0	0	0.00468041	0.0104657	0.0114986	0.00173521	0.0116938	0.00623502
176	854.7	C49H92O8PN	PE(44:3)		0.0008	0.000979796	0.0004	0.000894427	0.0015873	0.00249969	0	0		0.000690909	0.000817171	0.000285714	0.000638877	0.000495872	0.000740158	0	0		0.00133676	0.00145642	0.000412134	0.00092156	0.00145951	0.00228026	0	0		0.00913437	0.0113648	0.00187216	0.00418629	0.00628972	0.0110238	0	0
177	856.7	C49H94O8PN	PE(44:2)		0.00032	0.000715542	0	0	0	0	0	0		0.00032	0.000715542	0	0	0	0	0	0		0.000487534	0.00109016	0	0	0	0	0	0		0.00387322	0.00866079	0	0	0	0	0	0
178	Total PE				0.28064	0.0896703	0.81106	0.384867	2.78929	0.872265	2.58896	0.828522		0.25656	0.0647382	0.605726	0.295943	1.00826	0.420643	0.807867	0.1354		0.480957	0.146672	1.10166	0.367767	2.38952	0.544592	2.33707	0.92458		3.18082	0.94472	5.2764	1.1498	7.17132	1.49461	6.20828	1.84846
179	659.5	C36H71O6PN2	PE-Cer(16:1)		0.00032	0.000715542	0	0	0	0	0	0		0.000266667	0.000596285	0	0	0	0	0	0		0.000468868	0.00104842	0	0	0	0	0	0		0.00370734	0.00828985	0	0	0	0	0	0
180	661.5	C36H73O6PN2	PE-Cer(16:0)		0	0	0.00016	0.000357771	0	0	0	0		0	0	0.000145455	0.000325246	0	0	0	0		0	0	0.00020718	0.000463269	0	0	0	0		0	0	0.00116941	0.00261488	0	0	0	0
181	687.5	C38H75O6PN2	PE-Cer(18:1)		0.0008	0.00138564	0.0002	0.000447214	0	0	0	0		0.000693333	0.00115624	0.000142857	0.000319438	0	0	0	0		0.0011815	0.00203036	0.000206067	0.00046078	0	0	0	0		0.00935128	0.0160543	0.000936082	0.00209314	0	0	0	0
182	689.5	C38H77O6PN2	PE-Cer(18:0)		0.00112	0.00121326	0.00241	0.00427674	0	0	0	0		0.00109091	0.00122346	0.00173028	0.0030492	0	0	0	0		0.00187922	0.00180256	0.00263375	0.00435592	0	0	0	0		0.0131002	0.0148497	0.0130793	0.0195698	0	0	0	0
183	773.6	C44H89O6PN2	PE-Cer(24:0)		0.00176	0.00306725	0.00365	0.00547608	0.00107143	0.00147254	0.0004	0.000894427		0.00150545	0.0025415	0.00262878	0.00392906	0.000317147	0.000434987	0.000173913	0.000388881		0.00266992	0.00446023	0.00445398	0.00577089	0.000776647	0.00107571	0.000296581	0.000663175		0.0201028	0.0356507	0.0202856	0.0254066	0.00213242	0.00301362	0.000978609	0.00218824
184	Total PE-Cer				0.004	0.00463033	0.00642	0.00993388	0.00107143	0.00147254	0.0004	0.000894427		0.00355636	0.00380677	0.00464737	0.00706951	0.000317147	0.000434987	0.000173913	0.000388881		0.00619952	0.00657217	0.00750097	0.00996846	0.000776647	0.00107571	0.000296581	0.000663175		0.0462616	0.0539689	0.0354705	0.0444092	0.00213242	0.00301362	0.000978609	0.00218824
185	672.5	C37H70O7PN	ePE(32:3)		0	0	0.0004	0.000894427	0	0	0	0		0	0	0.000285714	0.000638877	0	0	0	0		0	0	0.000412134	0.00092156	0	0	0	0		0	0	0.00187216	0.00418629	0	0	0	0
186	674.5	C37H72O7PN	ePE(32:2)		0.00016	0.000357771	0.00036	0.000497996	0.00171429	0.00255551	0	0		0.000133333	0.000298142	0.000288312	0.000394814	0.000496894	0.000740726	0	0		0.000234434	0.00052421	0.000413247	0.000565866	0.00138286	0.00225986	0	0		0.00185367	0.00414493	0.00210549	0.00291242	0.00594645	0.011062	0	0
187	676.5	C37H74O7PN	ePE(32:1)		0	0	0.0002	0.000447214	0.00330159	0.00317143	0.0021381	0.00129104		0	0	0.000153846	0.00034401	0.0011446	0.000936067	0.0006606	0.000370429		0	0	0.000352301	0.000787769	0.00260256	0.0018568	0.00190087	0.00137697		0	0	0.00139186	0.0031123	0.00783752	0.00533172	0.00497995	0.00332399
188	678.5	C37H76O7PN	ePE(32:0)		0	0	0.00052	0.000742967	0.00288889	0.00269468	0.00265397	0.00209074		0	0	0.000433766	0.000649065	0.00113667	0.00107956	0.00081677	0.000562234		0	0	0.000620428	0.000925919	0.00247682	0.00231053	0.00231616	0.00165556		0	0	0.0032749	0.00512429	0.00639891	0.00598572	0.00632044	0.00415041
189	698.5	C39H72O7PN	ePE(34:4)		0.00016	0.000357771	0.00036	0.000497996	0	0	0	0		0.000133333	0.000298142	0.000288312	0.000394814	0	0	0	0		0.000234434	0.00052421	0.000413247	0.000565866	0	0	0	0		0.00185367	0.00414493	0.00210549	0.00291242	0	0	0	0
190	700.5	C39H74O7PN	ePE(34:3)		0	0	0.0002	0.000447214	0.0020873	0.00119694	0.00422063	0.00195045		0	0	0.000153846	0.00034401	0.000647387	0.000363133	0.00131864	0.000476462		0	0	0.000352301	0.000787769	0.001716	0.00100975	0.00382283	0.00223959		0	0	0.00139186	0.0031123	0.00587658	0.0045909	0.0102509	0.00516697
191	702.5	C39H76O7PN	ePE(34:2)		0.00192	0.00121326	0.00351	0.00188759	0.0160952	0.00436955	0.00962381	0.0035402		0.00178182	0.00110775	0.00270354	0.00169743	0.00581732	0.00236004	0.00310528	0.00104132		0.00313328	0.00208919	0.00510637	0.00342392	0.0141038	0.00440594	0.00831749	0.00213712		0.0214891	0.0132293	0.0249342	0.0139786	0.0452704	0.0256511	0.0224247	0.00390623
192	704.6	C39H78O7PN	ePE(34:1)		0.00304	0.00182428	0.00979	0.00524242	0.0509603	0.0197875	0.0361857	0.0120105		0.00276121	0.00158645	0.00717883	0.00376204	0.0180908	0.00709467	0.011261	0.00199523		0.00523181	0.00323568	0.0131434	0.00441529	0.0429406	0.00884397	0.0325879	0.0121054		0.0341361	0.0185611	0.0644321	0.0187983	0.129628	0.0300584	0.0866561	0.024547
193	706.6	C39H80O7PN	ePE(34:0)		0.00016	0.000357771	0.0004	0.000894427	0.00447619	0.00332652	0.00340317	0.00358171		0.000133333	0.000298142	0.000307692	0.000688021	0.00163254	0.00115087	0.00114148	0.00108377		0.000234434	0.00052421	0.000704602	0.00157554	0.00375873	0.00248924	0.00271017	0.00268618		0.00185367	0.00414493	0.00278372	0.00622459	0.0109984	0.00663791	0.00784967	0.00747888
194	724.5	C41H74O7PN	ePE(36:5)		0.00016	0.000357771	0	0	0.0107063	0.00387595	0.00514127	0.00359037		0.000133333	0.000298142	0	0	0.00387351	0.00174348	0.00162816	0.000963383		0.000234434	0.00052421	0	0	0.00913703	0.00241416	0.00431446	0.00219512		0.00185367	0.00414493	0	0	0.0275038	0.00722616	0.011851	0.00589576
195	726.5	C41H76O7PN	ePE(36:4)		0.00064	0.00143108	0.0022	0.00389872	0.0103889	0.00478174	0.00592381	0.00725262		0.000533333	0.00119257	0.00159341	0.00278382	0.00370992	0.00193867	0.00163423	0.00188817		0.000937735	0.00209684	0.00255921	0.00405132	0.00881877	0.00341004	0.00532343	0.00691165		0.00741467	0.0165797	0.0112085	0.0183029	0.0276522	0.0147558	0.0137093	0.0171218
196	728.6	C41H78O7PN	ePE(36:3)		0.00272	0.00091214	0.00767	0.00306301	0.0102063	0.00402483	0.00495397	0.00213562		0.00251152	0.000779649	0.00565657	0.00247787	0.00357016	0.00126212	0.00164847	0.000853698		0.00461601	0.0015381	0.0114929	0.00674632	0.00876515	0.00309497	0.00424768	0.00157677		0.0306306	0.00857441	0.0546026	0.023891	0.0289351	0.0198972	0.0115207	0.00385614
197	730.6	C41H80O7PN	ePE(36:2)		0.00816	0.00421046	0.0204	0.013985	0.0445714	0.0144066	0.0312254	0.0108742		0.00743515	0.00332737	0.0152851	0.0103446	0.0159958	0.00627669	0.00980091	0.00219802		0.0134834	0.00528458	0.0267445	0.0126697	0.0381091	0.0083928	0.027629	0.00856292		0.0938578	0.0501104	0.128261	0.0518563	0.11674	0.0376339	0.0740069	0.0168287
198	732.6	C41H82O7PN	ePE(36:1)		0.00496	0.00199198	0.01159	0.00742482	0.0939683	0.0323537	0.0672937	0.0183148		0.00454061	0.00166629	0.00851891	0.00534135	0.0332195	0.011696	0.0211341	0.00193742		0.00865691	0.00392255	0.0156165	0.00759458	0.0794095	0.0125755	0.0613725	0.02471		0.0558414	0.0191776	0.0737909	0.0268712	0.241503	0.0583394	0.163996	0.0514625
199	734.6	C41H84O7PN	ePE(36:0)		0.00016	0.000357771	0	0	0.000444444	0.000993808	0	0		0.000133333	0.000298142	0	0	0.000164609	0.000368077	0	0		0.000234434	0.00052421	0	0	0.000419203	0.000937367	0	0		0.00185367	0.00414493	0	0	0.0011986	0.00268015	0	0
200	750.5	C43H76O7PN	ePE(38:6)		0	0	0.00032	0.000715542	0.0340794	0.0102789	0.019554	0.00777511		0	0	0.000290909	0.000650493	0.0122669	0.00477993	0.00606583	0.00168093		0	0	0.00041436	0.000926538	0.0292037	0.00609989	0.0176195	0.00857844		0	0	0.00233882	0.00522976	0.0887312	0.0238463	0.0464797	0.0181747
201	752.6	C43H78O7PN	ePE(38:5)		0.00112	0.000438178	0.00447	0.00246313	0.0349048	0.0129708	0.0191698	0.00602519		0.00102303	0.000342582	0.00343084	0.00204657	0.0124346	0.00504935	0.00602965	0.00118385		0.00190611	0.000703295	0.00617139	0.00336075	0.0295706	0.0066628	0.0171658	0.0053072		0.0126371	0.00448322	0.0289589	0.013575	0.0905903	0.0297157	0.046135	0.0119043
202	754.6	C43H80O7PN	ePE(38:4)		0.00224	0.000669328	0.00666	0.00574428	0.021	0.00709987	0.0125238	0.00409496		0.00208485	0.00063007	0.00479552	0.00422062	0.00773909	0.00381551	0.00394048	0.000929624		0.00393125	0.00150407	0.00911733	0.00708206	0.0181483	0.00575032	0.0113521	0.00501902		0.0254375	0.00681388	0.0417568	0.0281524	0.053569	0.0112424	0.030097	0.0102553
203	756.6	C43H82O7PN	ePE(38:3)		0.00544	0.00131453	0.01485	0.00774919	0.00677778	0.00271215	0.00613651	0.00161115		0.00501091	0.00094978	0.0111677	0.00608209	0.00257637	0.00153947	0.0019713	0.000485488		0.00923194	0.00176969	0.0199501	0.00739742	0.00599943	0.00288168	0.00542695	0.00137766		0.0617701	0.0136602	0.0973446	0.0300103	0.0170422	0.00585361	0.0147321	0.00288275
204	758.6	C43H84O7PN	ePE(38:2)		0.00384	0.00221991	0.00917	0.00576147	0.0176667	0.00797601	0.00893492	0.00374766		0.00346909	0.00176272	0.00684115	0.0043235	0.00628598	0.00283477	0.00276027	0.00084522		0.00644856	0.00318623	0.0119762	0.00462616	0.0147817	0.00393578	0.00806328	0.00332607		0.0433161	0.0248998	0.0586665	0.0205401	0.0436092	0.00625695	0.0215484	0.00815382
205	760.6	C43H86O7PN	ePE(38:1)		0.0016	0.000565685	0.00339	0.00162727	0.0220714	0.00690866	0.0110286	0.00424125		0.00146182	0.0004321	0.00255492	0.00130009	0.00775258	0.00230746	0.00343605	0.00085552		0.00272845	0.000884795	0.00478542	0.00255372	0.0186942	0.00222629	0.00979351	0.00379658		0.0183614	0.00679154	0.0221866	0.00840038	0.0577378	0.0178501	0.0261349	0.00790887
206	762.6	C43H88O7PN	ePE(38:0)	PE(38:7)	0.00176	0.00350542	0.00061	0.000579224	0.00453175	0.00132221	0.00392063	0.00274677		0.00149333	0.00291265	0.000454978	0.000417896	0.00161945	0.000575791	0.0011321	0.000728069		0.00261504	0.0051244	0.000812726	0.000839888	0.00395122	0.00119723	0.00367579	0.00281544		0.0203171	0.0406372	0.00376557	0.00367741	0.0127671	0.00744665	0.00937475	0.00679426
207	778.6	C45H80O7PN	ePE(40:6)		0.0008	0.0008	0.00149	0.00119394	0.0237143	0.00792825	0.0121302	0.00227479		0.00070303	0.000698417	0.00117763	0.00109221	0.00853901	0.00352352	0.00394773	0.000997349		0.00139164	0.0013364	0.00195906	0.00147278	0.0202218	0.00451648	0.0109578	0.00319606		0.00892007	0.00877541	0.0104908	0.00859116	0.0603794	0.0103313	0.0295273	0.00608224
208	780.6	C45H82O7PN	ePE(40:5)		0.00064	0.000669328	0.00056	0.000876356	0.0156825	0.00391295	0.00989048	0.00359404		0.000572121	0.000572296	0.000431169	0.000640353	0.00580939	0.00277636	0.00309803	0.000827853		0.00100195	0.0010068	0.000619314	0.000922186	0.0138004	0.00441189	0.00878489	0.00299439		0.00728331	0.00773506	0.00304157	0.00434618	0.0421415	0.0153534	0.023317	0.00563243
209	782.6	C45H84O7PN	ePE(40:4)		0.00176	0.00118659	0.00166	0.00212791	0.00510317	0.00174052	0.00284921	0.00240864		0.00159515	0.00104642	0.00124802	0.0016056	0.00193691	0.00119992	0.000812084	0.000589598		0.00293595	0.00176553	0.00276764	0.00375182	0.00458676	0.00217906	0.00283548	0.00284972		0.0203712	0.0140191	0.0114489	0.014707	0.0142945	0.00788083	0.0072443	0.006918
210	784.6	C45H86O7PN	ePE(40:3)		0.00064	0.000669328	0.00146	0.0012482	0.00265873	0.00204086	0.00444762	0.00346436		0.000610909	0.000661778	0.00108318	0.000904975	0.000964847	0.000681831	0.00130602	0.000904973		0.00112099	0.00108542	0.00226911	0.00225138	0.00217394	0.00135149	0.00389934	0.00313865		0.00744659	0.00803873	0.00960124	0.00875571	0.00571372	0.00335177	0.0100307	0.00767369
211	786.6	C45H88O7PN	ePE(40:2)		0.00032	0.000438178	0.00297	0.00452819	0.00401587	0.00145652	0.00329365	0.00246831		0.000278788	0.000382347	0.00218285	0.00321374	0.00144072	0.000650541	0.000970814	0.000682852		0.000523754	0.000723713	0.00343288	0.00449761	0.00344596	0.00112717	0.0033027	0.00293753		0.00349303	0.00479801	0.0156877	0.0204586	0.0103001	0.00295531	0.00861637	0.00748029
212	Total ePE				0.0424	0.0195878	0.10521	0.0586844	0.444016	0.146819	0.286643	0.0912273		0.0385333	0.0149602	0.0785067	0.0438515	0.158865	0.0614562	0.0896199	0.0147914		0.0710669	0.0269479	0.142207	0.0603036	0.378218	0.0766118	0.25742	0.0940414		0.481992	0.22097	0.677443	0.20639	1.15236	0.325075	0.686803	0.188432
213	848.5	C43H75O13P	PI(34:4)		0	0	0	0	0	0	0	0		0	0	0	0	0	0	0	0		0	0	0	0	0	0	0	0		0	0	0	0	0	0	0	0
214	850.5	C43H77O13P	PI(34:3)		0	0	0.00045	0.000622495	0.00142857	0.00142857	0.000444444	0.000993808		0	0	0.000309524	0.000425918	0.000489993	0.000447522	0.00015873	0.000354931		0	0	0.000605546	0.000896904	0.00118048	0.00114612	0.00046722	0.00104474		0	0	0.00259616	0.00377832	0.00416457	0.00519972	0.00137207	0.00306805
215	852.5	C43H79O13P	PI(34:2)		0.00048	0.00107331	0.00097	0.000924392	0.010127	0.0053739	0.0171397	0.00200058		0.00048	0.00107331	0.00074329	0.000722593	0.00370347	0.00213852	0.00559645	0.00128446		0.000812099	0.00181591	0.00122597	0.00111952	0.00888698	0.00515348	0.0155655	0.00442632		0.00534125	0.0119434	0.00587107	0.00549833	0.0252461	0.0136354	0.04242	0.0105034
216	854.5	C43H81O13P	PI(34:1)		0.00112	0.00133866	0.00226	0.00336719	0.100429	0.0539879	0.074127	0.0259421		0.00103273	0.00121304	0.00170956	0.00257699	0.0344513	0.0151547	0.0237379	0.00814346		0.00219895	0.00287449	0.00382455	0.00596828	0.0826814	0.0286132	0.0657122	0.0253738		0.0129514	0.0159685	0.0156245	0.0233923	0.252531	0.0959755	0.178371	0.0592141
217	872.5	C45H75O13P	PI(36:6)		0.00048	0.000715542	0.00025	0.000559017	0.00496032	0.00174378	0.00430476	0.00399853		0.000424242	0.000644251	0.000166667	0.000372678	0.00175685	0.00062058	0.00131114	0.00122211		0.000922704	0.00149666	0.000399479	0.000893262	0.00447685	0.00176562	0.0040032	0.00399783		0.00572168	0.00860598	0.00166008	0.00371206	0.014466	0.00809025	0.0100939	0.00948027
218	874.5	C45H77O13P	PI(36:5)		0	0	0	0	0	0	0.0004	0.000894427		0	0	0	0	0	0	0.000173913	0.000388881		0	0	0	0	0	0	0.000296581	0.000663175		0	0	0	0	0	0	0.000978609	0.00218824
219	876.5	C45H79O13P	PI(36:4)		0.00016	0.000357771	0.00036	0.000497996	0.00473016	0.00556054	0.00457619	0.00326496		0.000133333	0.000298142	0.000299301	0.000410103	0.00163459	0.0016446	0.00150774	0.00129225		0.000234434	0.00052421	0.000559481	0.000807913	0.00360544	0.00324889	0.00394878	0.00300416		0.00185367	0.00414493	0.00256127	0.00352914	0.0103119	0.00797979	0.0108361	0.00844591
220	878.5	C45H81O13P	PI(36:3)		0.00064	0.00104307	0.00733	0.00446872	0.00765079	0.00463372	0.00284286	0.00293657		0.00064	0.00104307	0.00538307	0.0030558	0.00277612	0.00168034	0.00100049	0.00111471		0.00105587	0.0017606	0.0101819	0.00668817	0.00661554	0.00393476	0.00212425	0.00210613		0.00727786	0.011642	0.0541849	0.0411705	0.0208694	0.0144512	0.00611571	0.00647714
221	880.6	C45H83O13P	PI(36:2)		0.00176	0.000669328	0.01122	0.00785124	0.0708651	0.0318945	0.0617048	0.0188858		0.00166061	0.000680517	0.00868558	0.00667923	0.0247188	0.0095958	0.0197621	0.00577669		0.0030903	0.0012972	0.0163531	0.0131255	0.0600669	0.0213917	0.0549337	0.0195537		0.0198542	0.00674436	0.0842161	0.0630228	0.194457	0.120746	0.148935	0.0440688
222	882.6	C45H85O13P	PI(36:1)		0.00032	0.000715542	0.00589	0.00441141	0.227119	0.113537	0.174871	0.0402793		0.000266667	0.000596285	0.00431911	0.00316669	0.0805056	0.0373319	0.0580035	0.0214932		0.000468868	0.00104842	0.00809566	0.00618333	0.190223	0.0662813	0.152997	0.0191646		0.00370734	0.00828985	0.0402468	0.0277616	0.571106	0.19184	0.42264	0.0822271
223	900.5	C47H79O13P	PI(38:6)		0.01792	0.00243967	0.00632	0.00491103	0.0116032	0.00700133	0.0120032	0.0158259		0.0167127	0.00275856	0.00443548	0.00332739	0.00451079	0.00394937	0.00329014	0.00378883		0.0314562	0.00906587	0.00863707	0.00642985	0.0102913	0.00733968	0.0124735	0.0187224		0.204613	0.0303413	0.0403355	0.0256665	0.0309572	0.0201441	0.0314837	0.0453363
224	902.5	C47H81O13P	PI(38:5)		0	0	0.00077	0.000734507	0.010627	0.00776706	0.00956349	0.00722102		0	0	0.000601005	0.000614763	0.00375272	0.00253031	0.00349284	0.00318685		0	0	0.00113256	0.00104029	0.00881475	0.00572919	0.00774982	0.00533515		0	0	0.00627979	0.00613299	0.0257627	0.0152438	0.0227152	0.017824
225	904.6	C47H83O13P	PI(38:4)		0.00544	0.00235966	0.02208	0.0122999	0.097873	0.0541367	0.0530302	0.0210186		0.00507879	0.00238754	0.0168715	0.0104568	0.0358636	0.021144	0.0175549	0.00924651		0.00931563	0.00404514	0.0312376	0.020136	0.0828851	0.0377828	0.0454364	0.0136109		0.0634296	0.0306813	0.1606	0.100376	0.24517	0.0963036	0.124768	0.0421049
226	906.6	C47H85O13P	PI(38:3)		0.01984	0.00477996	0.08181	0.0446266	0.0417302	0.0212052	0.0141635	0.0116618		0.0182642	0.00339223	0.0616368	0.0351551	0.0147889	0.00699109	0.00475262	0.00356593		0.0339421	0.0080047	0.114613	0.0714352	0.03502	0.0126386	0.0111048	0.00779882		0.228339	0.0630581	0.580501	0.334253	0.108168	0.0497578	0.0312446	0.0216393
227	908.6	C47H87O13P	PI(38:2)		0.00176	0.00182428	0.01058	0.00683242	0.032246	0.0174792	0.0195365	0.00560754		0.00167273	0.00177401	0.00794791	0.00524216	0.0115193	0.00615421	0.00637935	0.00185756		0.00317402	0.00325996	0.0153128	0.0121681	0.0270057	0.0106112	0.0169738	0.00260839		0.0206978	0.0221751	0.0774357	0.0551721	0.0830979	0.0394313	0.0464101	0.00716012
228	910.6	C47H89O13P	PI(38:1)		0.00016	0.000357771	0.0002	0.000447214	0.0111984	0.00754868	0.00738095	0.00509546		0.000145455	0.000325246	0.000142857	0.000319438	0.00407018	0.00266035	0.002335	0.00166011		0.000344135	0.000769509	0.000206067	0.00046078	0.00945029	0.00578447	0.00661362	0.00558128		0.001934	0.00432457	0.000936082	0.00209314	0.0272901	0.014784	0.0176869	0.0141346
229	912.6	C47H91O13P	PI(38:0)		0.00096	0.000669328	0	0	0.000571429	0.00127775	0.00128889	0.00196513		0.00086303	0.000578424	0	0	0.00031746	0.000709863	0.000491373	0.000719102		0.00169022	0.0012877	0	0	0.000635538	0.00142111	0.00123102	0.00202802		0.0111513	0.00801304	0	0	0.00152736	0.00341529	0.00372275	0.00597716
230	924.5	C49H79O13P	PI(40:8)		0	0	0	0	0.000444444	0.000993808	0.000444444	0.000993808		0	0	0	0	0.000164609	0.000368077	0.00015873	0.000354931		0	0	0	0	0.000419203	0.000937367	0.00046722	0.00104474		0	0	0	0	0.0011986	0.00268015	0.00137207	0.00306805
231	926.5	C49H81O13P	PI(40:7)		0.00016	0.000357771	0.00025	0.000559017	0	0	0	0		0.00016	0.000357771	0.00015625	0.000349386	0	0	0	0		0.000243767	0.00054508	0.000365899	0.000818176	0	0	0	0		0.00193661	0.00433039	0.00254911	0.00569999	0	0	0	0
232	928.6	C49H83O13P	PI(40:6)		0	0	0	0	0.00713492	0.00364609	0.0012381	0.00170367		0	0	0	0	0.00244556	0.00103966	0.000325397	0.000445789		0	0	0	0	0.00599489	0.0025418	0.00115817	0.00171532		0	0	0	0	0.0194205	0.012364	0.00292032	0.00425432
233	930.6	C49H85O13P	PI(40:5)		0.00176	0.00104307	0.00072	0.000701427	0.00494444	0.0038852	0.00467143	0.00249287		0.00165091	0.00102839	0.000587612	0.00061057	0.0017792	0.001338	0.00165853	0.00122355		0.00290709	0.00161376	0.000972729	0.000965123	0.00401474	0.00237727	0.00419227	0.00222915		0.0201293	0.0117354	0.00466676	0.00495471	0.0114973	0.00509088	0.012032	0.00753426
234	932.6	C49H87O13P	PI(40:4)		0.00144	0.000357771	0.00061	0.000579224	0.00130159	0.00129148	0.000444444	0.000993808		0.00132848	0.00031017	0.000444562	0.000406604	0.000488971	0.000446561	0.00015873	0.000354931		0.00252094	0.000828705	0.000779147	0.000782047	0.00107953	0.00100305	0.00046722	0.00104474		0.0163515	0.00388222	0.0046546	0.00524921	0.00281761	0.00269682	0.00137207	0.00306805
235	934.6	C49H89O13P	PI(40:3)		0.00016	0.000357771	0	0	0	0	0	0		0.000133333	0.000298142	0	0	0	0	0	0		0.000234434	0.00052421	0	0	0	0	0	0		0.00185367	0.00414493	0	0	0	0	0	0
236	936.6	C49H91O13P	PI(40:2)		0.01856	0.00591676	0.00813	0.00420827	0.00544444	0.00364544	0.0477206	0.0744479		0.0174545	0.0059882	0.00578401	0.00292677	0.00223438	0.00233198	0.0127016	0.018194		0.0331061	0.0148641	0.0118008	0.00709368	0.0052124	0.00444253	0.0508333	0.0871172		0.212811	0.0734332	0.0591537	0.0394887	0.0158087	0.0117138	0.126566	0.212143
237	938.6	C49H93O13P	PI(40:1)		0	0	0	0	0	0	0	0		0	0	0	0	0	0	0	0		0	0	0	0	0	0	0	0		0	0	0	0	0	0	0	0
238	940.7	C49H95O13P	PI(40:0)		0.00656	0.00931923	0.00115	0.00169189	0.000944444	0.00129696	0	0		0.00600242	0.0084473	0.000776442	0.00110065	0.000316124	0.000433489	0	0		0.0130397	0.0206156	0.0018023	0.00256387	0.000853296	0.00116872	0	0		0.0779306	0.113441	0.0104311	0.0166714	0.00247569	0.00339282	0	0
239	948.5	C51H79O13P	PI(42:10)		0	0	0	0	0	0	0	0		0	0	0	0	0	0	0	0		0	0	0	0	0	0	0	0		0	0	0	0	0	0	0	0
240	950.5	C51H81O13P	PI(42:9)		0.00016	0.000357771	0	0	0	0	0	0		0.000145455	0.000325246	0	0	0	0	0	0		0.00028932	0.000646939	0	0	0	0	0	0		0.00163936	0.00366573	0	0	0	0	0	0
241	952.6	C51H83O13P	PI(42:8)		0.00048	0.000715542	0	0	0.000285714	0.000638877	0.00116667	0.00162447		0.000450909	0.000659376	0	0	0.00015873	0.000354931	0.000327957	0.000449174		0.000932037	0.00149875	0	0	0.000317769	0.000710553	0.0012101	0.00174967		0.00580462	0.00865059	0	0	0.000763682	0.00170765	0.0029519	0.00427644
242	954.6	C51H85O13P	PI(42:7)		0.0008	0.000979796	0.0011	0.00123238	0	0	0	0		0.000758788	0.000981654	0.000784455	0.000942522	0	0	0	0		0.00125506	0.00149674	0.00182228	0.00215981	0	0	0	0		0.00930287	0.0118767	0.00838478	0.00888413	0	0	0	0
243	956.6	C51H87O13P	PI(42:6)		0.00016	0.000357771	0	0	0	0	0.000571429	0.00127775		0.000145455	0.000325246	0	0	0	0	0.00015873	0.000354931		0.00028932	0.000646939	0	0	0	0	0.000394191	0.000881437		0.00163936	0.00366573	0	0	0	0	0.00104943	0.00234661
244	958.6	C51H89O13P	PI(42:5)		0.00032	0.000438178	0	0	0.000571429	0.00127775	0	0		0.000305455	0.00041905	0	0	0.000165631	0.000370363	0	0		0.000614835	0.000851847	0	0	0.000342555	0.000765975	0	0		0.00371442	0.00509342	0	0	0.000855333	0.00191258	0	0
245	960.6	C51H91O13P	PI(42:4)		0	0	0	0	0	0	0	0		0	0	0	0	0	0	0	0		0	0	0	0	0	0	0	0		0	0	0	0	0	0	0	0
246	962.6	C51H93O13P	PI(42:3)		0.00064	0.00104307	0	0	0	0	0	0		0.000569697	0.000946309	0	0	0	0	0	0		0.00126684	0.00223585	0	0	0	0	0	0		0.00765568	0.012594	0	0	0	0	0	0
247	964.7	C51H95O13P	PI(42:2)		0.00016	0.000357771	0	0	0	0	0	0		0.000145455	0.000325246	0	0	0	0	0	0		0.000344135	0.000769509	0	0	0	0	0	0		0.001934	0.00432457	0	0	0	0	0	0
248	972.5	C53H79O13P	PI(44:12)		0.00016	0.000357771	0.0002	0.000447214	0	0	0	0		0.00016	0.000357771	0.000153846	0.00034401	0	0	0	0		0.0002707	0.000605303	0.000352301	0.000787769	0	0	0	0		0.00178042	0.00398113	0.00139186	0.0031123	0	0	0	0
249	974.5	C53H81O13P	PI(44:11)		0	0	0	0	0	0	0	0		0	0	0	0	0	0	0	0		0	0	0	0	0	0	0	0		0	0	0	0	0	0	0	0
250	976.6	C53H83O13P	PI(44:10)		0	0	0	0	0	0	0	0		0	0	0	0	0	0	0	0		0	0	0	0	0	0	0	0		0	0	0	0	0	0	0	0
251	978.6	C53H85O13P	PI(44:9)		0	0	0	0	0	0	0	0		0	0	0	0	0	0	0	0		0	0	0	0	0	0	0	0		0	0	0	0	0	0	0	0
252	980.6	C53H87O13P	PI(44:8)		0.00016	0.000357771	0	0	0	0	0	0		0.00016	0.000357771	0	0	0	0	0	0		0.000243767	0.00054508	0	0	0	0	0	0		0.00193661	0.00433039	0	0	0	0	0	0
253	982.6	C53H89O13P	PI(44:7)		0.00288	0.00243967	0.00121	0.00110476	0.000571429	0.00127775	0.000944444	0.00129696		0.00263758	0.00222644	0.000916517	0.000845429	0.00031746	0.000709863	0.00032002	0.000438229		0.00548065	0.00532913	0.00186963	0.00203549	0.000635538	0.00142111	0.000913341	0.0012512		0.0327174	0.0290214	0.00794116	0.00783531	0.00152736	0.00341529	0.00245309	0.00339821
254	984.6	C53H91O13P	PI(44:6)		0.00016	0.000357771	0	0	0	0	0	0		0.00016	0.000357771	0	0	0	0	0	0		0.000243767	0.00054508	0	0	0	0	0	0		0.00193661	0.00433039	0	0	0	0	0	0
255	986.6	C53H93O13P	PI(44:5)		0	0	0	0	0	0	0	0		0	0	0	0	0	0	0	0		0	0	0	0	0	0	0	0		0	0	0	0	0	0	0	0
256	988.7	C53H95O13P	PI(44:4)		0.00016	0.000357771	0.00016	0.000357771	0	0	0	0		0.000145455	0.000325246	0.000145455	0.000325246	0	0	0	0		0.00028932	0.000646939	0.00020718	0.000463269	0	0	0	0		0.00163936	0.00366573	0.00116941	0.00261488	0	0	0	0
257	990.7	C53H97O13P	PI(44:3)		0	0	0	0	0	0	0	0		0	0	0	0	0	0	0	0		0	0	0	0	0	0	0	0		0	0	0	0	0	0	0	0
258	992.7	C53H99O13P	PI(44:2)		0	0	0	0	0	0	0	0		0	0	0	0	0	0	0	0		0	0	0	0	0	0	0	0		0	0	0	0	0	0	0	0
259	Total PI				0.08592	0.0211479	0.16402	0.0790279	0.654802	0.314641	0.514579	0.145877		0.0798885	0.0197469	0.123001	0.0630612	0.23293	0.106851	0.165358	0.0479293		0.152277	0.0637569	0.232357	0.134412	0.550709	0.185448	0.461267	0.1713		0.989586	0.292434	1.17339	0.636199	1.67149	0.618353	1.25051	0.388335
260	734.5	C38H72O10PN	PS(32:1)		0.00064	0.000669328	0.00705	0.00389872	0.0040873	0.00262955	0.00914286	0.00303793		0.000572121	0.000572296	0.00535553	0.00312863	0.00145484	0.000893854	0.00297504	0.00104338		0.00105677	0.00104384	0.00961197	0.00488991	0.00335442	0.0014773	0.00851333	0.00419281		0.00757795	0.00780629	0.0464213	0.0190998	0.00987829	0.00341374	0.0229157	0.0096712
261	736.5	C38H74O10PN	PS(32:0)		0.00032	0.000438178	0.00016	0.000357771	0.0005	0.00111803	0	0		0.00032	0.000438178	0.000145455	0.000325246	0.000151515	0.000338798	0	0		0.000514467	0.00070607	0.00020718	0.000463269	0.000434093	0.000970661	0	0		0.00371703	0.00509723	0.00116941	0.00261488	0.00127709	0.00285566	0	0
262	756.5	C40H70O10PN	PS(34:4)		0.00016	0.000357771	0.0002	0.000447214	0	0	0	0		0.000133333	0.000298142	0.000142857	0.000319438	0	0	0	0		0.000234434	0.00052421	0.000206067	0.00046078	0	0	0	0		0.00185367	0.00414493	0.000936082	0.00209314	0	0	0	0
263	758.5	C40H72O10PN	PS(34:3)		0	0	0	0	0.00133333	0.00298142	0.00106667	0.00153478		0	0	0	0	0.000493827	0.00110423	0.00034058	0.000466534		0	0	0	0	0.00125761	0.0028121	0.00106056	0.00167082		0	0	0	0	0.0035958	0.00804044	0.0028495	0.0042086
264	760.5	C40H74O10PN	PS(34:2)		0.00208	0.00121326	0.00825	0.00355317	0.00185714	0.00211891	0.0029	0.00543599		0.00189818	0.00111441	0.00629022	0.00337948	0.000627392	0.000640958	0.000980365	0.00174712		0.0036791	0.00246284	0.0116395	0.00552837	0.00152851	0.00177623	0.00252719	0.00486456		0.0240249	0.0144207	0.0601124	0.0320375	0.0041732	0.00521748	0.00638369	0.011732
265	762.5	C40H76O10PN	PS(34:1)		0.008	0.00282843	0.04876	0.013956	0.0691349	0.0145531	0.0924476	0.0192754		0.00734061	0.00237064	0.0358544	0.0107184	0.024635	0.00803694	0.0293264	0.0020715		0.0142809	0.00698006	0.0682123	0.0187478	0.0605238	0.0154823	0.0840022	0.028165		0.091007	0.0320932	0.340763	0.107554	0.195269	0.107175	0.225076	0.0549702
266	764.5	C40H78O10PN	PS(34:0)		0	0	0	0	0	0	0	0		0	0	0	0	0	0	0	0		0	0	0	0	0	0	0	0		0	0	0	0	0	0	0	0
267	780.5	C42H70O10PN	PS(36:6)		0	0	0	0	0	0	0	0		0	0	0	0	0	0	0	0		0	0	0	0	0	0	0	0		0	0	0	0	0	0	0	0
268	782.5	C42H72O10PN	PS(36:5)		0	0	0.00025	0.000559017	0	0	0	0		0	0	0.00015625	0.000349386	0	0	0	0		0	0	0.000365899	0.000818176	0	0	0	0		0	0	0.00254911	0.00569999	0	0	0	0
269	784.5	C42H74O10PN	PS(36:4)		0.00016	0.000357771	0	0	0.00142857	0.00202031	0.0004	0.000894427		0.00016	0.000357771	0	0	0.000641822	0.00103623	0.000173913	0.000388881		0.000243767	0.00054508	0	0	0.00147346	0.00215803	0.000296581	0.000663175		0.00193661	0.00433039	0	0	0.00483661	0.00663806	0.000978609	0.00218824
270	786.5	C42H76O10PN	PS(36:3)		0.00016	0.000357771	0.00223	0.00185122	0.00314286	0.00409081	0.00147143	0.00137729		0.00016	0.000357771	0.00168476	0.00145748	0.00108915	0.00127052	0.000493934	0.000451812		0.0002707	0.000605303	0.00351432	0.00327322	0.00289206	0.00355022	0.00113689	0.00107199		0.00178042	0.00398113	0.0172258	0.0137253	0.00918129	0.010621	0.00310906	0.00284422
271	788.5	C42H78O10PN	PS(36:2)		0.01136	0.00558283	0.04128	0.0174203	0.0374286	0.0103214	0.0460762	0.0184605		0.0103248	0.00476035	0.0306707	0.0134854	0.013899	0.00683912	0.0144769	0.00473608		0.0203115	0.0123636	0.0563685	0.0173352	0.0336449	0.0134011	0.0421335	0.0226756		0.129901	0.0653034	0.278122	0.0745136	0.107314	0.0617226	0.111095	0.0490479
272	790.6	C42H80O10PN	PS(36:1)		0.02416	0.00847396	0.06861	0.0231862	0.176294	0.0268273	0.17274	0.0355425		0.0222594	0.00722702	0.0505364	0.0176542	0.0641126	0.0235546	0.0555403	0.0111597		0.0403935	0.00977218	0.0959019	0.0323979	0.154363	0.0321177	0.154026	0.0394778		0.277431	0.104164	0.4789	0.169613	0.474476	0.149428	0.416304	0.0731756
273	792.6	C42H82O10PN	PS(36:0)	ePS(38:7)	0	0	0.00016	0.000357771	0	0	0	0		0	0	0.000145455	0.000325246	0	0	0	0		0	0	0.00020718	0.000463269	0	0	0	0		0	0	0.00116941	0.00261488	0	0	0	0
274	806.5	C44H72O10PN	PS(38:7)		0.0128	0.00809938	0.00341	0.00325238	0.00887302	0.00824794	0.00515397	0.00289581		0.012177	0.00837286	0.00233078	0.00200181	0.0033984	0.00320698	0.00162092	0.0009546		0.0218394	0.0122426	0.0051827	0.00493566	0.0079945	0.00799835	0.00492791	0.00342692		0.147994	0.100321	0.0288369	0.0350313	0.0216883	0.0228708	0.0133886	0.00961867
275	808.5	C44H74O10PN	PS(38:6)		0.00016	0.000357771	0.0002	0.000447214	0.00114286	0.00156492	0.000844444	0.00115897		0.00016	0.000357771	0.000142857	0.000319438	0.000483092	0.000713877	0.000332643	0.000456281		0.000243767	0.00054508	0.000206067	0.00046078	0.000978093	0.00143596	0.000763801	0.00108851		0.00193661	0.00433039	0.000936082	0.00209314	0.0023827	0.0034722	0.00235068	0.0032931
276	810.5	C44H76O10PN	PS(38:5)		0.00016	0.000357771	0.0002	0.000447214	0.00237302	0.00210512	0.00329365	0.00246831		0.00016	0.000357771	0.000142857	0.000319438	0.000806117	0.0005864	0.000970814	0.000682852		0.000243767	0.00054508	0.000206067	0.00046078	0.00221137	0.00188638	0.0033027	0.00293753		0.00193661	0.00433039	0.000936082	0.00209314	0.00833049	0.00990293	0.00861637	0.00748029
277	812.5	C44H78O10PN	PS(38:4)		0.0008	0.000565685	0.00352	0.00355696	0.0095873	0.00490859	0.00988095	0.00845573		0.000756364	0.0005158	0.00250932	0.00245415	0.00367612	0.00298549	0.00299629	0.0022116		0.00149206	0.00123712	0.00443716	0.00380144	0.00858171	0.00558588	0.00935166	0.0101542		0.0092244	0.00686997	0.0237437	0.0217097	0.0257655	0.0148646	0.0243806	0.024622
278	814.6	C44H80O10PN	PS(38:3)		0.00464	0.00285096	0.01448	0.00820073	0.007	0.00627597	0.00255873	0.00352392		0.00418182	0.0023978	0.0108952	0.00623445	0.00272539	0.00291587	0.000808834	0.000972612		0.00829749	0.00587089	0.0195893	0.00874796	0.00667142	0.00657297	0.00194637	0.00243292		0.0534343	0.034644	0.0920705	0.0318938	0.0230104	0.0262912	0.00549898	0.00647317
279	816.6	C44H82O10PN	PS(38:2)		0.00288	0.00184174	0.01186	0.00810659	0.0117143	0.00745052	0.00746349	0.00632665		0.00272	0.00167872	0.00835247	0.0049752	0.00418094	0.00298002	0.0024115	0.00195249		0.00532551	0.00386582	0.0170047	0.012496	0.0102679	0.00716663	0.00641895	0.00558521		0.0327323	0.021218	0.0920849	0.0884472	0.0348408	0.033302	0.0171507	0.0141288
280	818.6	C44H84O10PN	PS(38:1)		0.00416	0.00249159	0.00538	0.00182777	0.0220317	0.00831661	0.0213016	0.00568156		0.00388848	0.0022963	0.00407744	0.00180912	0.00789515	0.00317104	0.00691041	0.00183401		0.00771232	0.00582679	0.00780232	0.00372331	0.018724	0.0051379	0.0200537	0.00938539		0.0477365	0.0303196	0.0377982	0.0139099	0.0545391	0.00644642	0.0542401	0.022565
281	820.6	C44H86O10PN	PS(38:0)	ePS(40:7)	0	0	0.00056	0.000517687	0	0	0	0		0	0	0.000442158	0.000404144	0	0	0	0		0	0	0.000765548	0.000759484	0	0	0	0		0	0	0.00349735	0.00329275	0	0	0	0
282	832.5	C46H74O10PN	PS(40:8)		0	0	0	0	0.000571429	0.00127775	0.000444444	0.000993808		0	0	0	0	0.000165631	0.000370363	0.00015873	0.000354931		0	0	0	0	0.000520152	0.0011631	0.00046722	0.00104474		0	0	0	0	0.00254556	0.00569204	0.00137207	0.00306805
283	834.5	C46H76O10PN	PS(40:7)		0.00144	0.00199198	0.00095	0.00103682	0.0247381	0.0157603	0.0141143	0.0124926		0.00124848	0.00171613	0.000643429	0.000690984	0.00796268	0.00380247	0.00405154	0.00347465		0.00254871	0.00350861	0.00151716	0.00165072	0.0200211	0.0100321	0.0123913	0.0108013		0.0170044	0.0234412	0.00726114	0.00746405	0.0682546	0.0565056	0.0313464	0.0268523
284	836.5	C46H78O10PN	PS(40:6)		0	0	0.00025	0.000559017	0.00942857	0.00711423	0.00868889	0.0120755		0	0	0.00015625	0.000349386	0.00321476	0.00223406	0.00248787	0.00289172		0	0	0.000365899	0.000818176	0.00760132	0.004527	0.00929561	0.0141456		0	0	0.00254911	0.00569999	0.0233145	0.0142621	0.0237014	0.0342054
285	838.6	C46H80O10PN	PS(40:5)		0.00016	0.000357771	0.00016	0.000357771	0.0124206	0.00572819	0.00954603	0.00556812		0.000145455	0.000325246	0.000145455	0.000325246	0.00467406	0.0030517	0.00306954	0.00169676		0.000344135	0.000769509	0.00020718	0.000463269	0.0107507	0.00507314	0.00834092	0.00469588		0.001934	0.00432457	0.00116941	0.00261488	0.0314139	0.0107378	0.0224217	0.0121065
286	840.6	C46H82O10PN	PS(40:4)		0.00016	0.000357771	0.00036	0.000497996	0.000444444	0.000993808	0.00106667	0.00153478		0.00016	0.000357771	0.000288312	0.000394814	0.000164609	0.000368077	0.00034058	0.000466534		0.000243767	0.00054508	0.000413247	0.000565866	0.000419203	0.000937367	0.00106056	0.00167082		0.00193661	0.00433039	0.00210549	0.00291242	0.0011986	0.00268015	0.0028495	0.0042086
287	842.6	C46H84O10PN	PS(40:3)		0.00064	0.000876356	0.00172	0.00248837	0.000285714	0.000638877	0	0		0.000557576	0.000764694	0.00135684	0.0019185	0.00015873	0.000354931	0	0		0.00115714	0.00163126	0.00273423	0.00446313	0.000317769	0.000710553	0	0		0.00757534	0.0103769	0.0116261	0.0175099	0.000763682	0.00170765	0	0
288	844.6	C46H86O10PN	PS(40:2)		0.00224	0.00290654	0.00291	0.00360076	0.00701587	0.00547838	0.00431429	0.00416546		0.00219879	0.00293258	0.00199745	0.0022619	0.00270304	0.00248063	0.00149442	0.00151676		0.00352976	0.00441556	0.00438375	0.00547039	0.00606794	0.00510316	0.00326114	0.00303617		0.0262638	0.035398	0.0255167	0.0372005	0.0158378	0.0128443	0.00922477	0.00897556
289	846.6	C46H88O10PN	PS(40:1)		0.0016	0.00169706	0.00402	0.00295309	0.0136032	0.00664575	0.00910476	0.00754085		0.00148364	0.00154415	0.00285307	0.00205258	0.00526867	0.00429958	0.00302853	0.00278074		0.00313003	0.00357751	0.0052697	0.00273285	0.0124982	0.00819185	0.0083712	0.00772386		0.0181489	0.0200779	0.0261749	0.0137966	0.0384278	0.0239956	0.0225568	0.020438
290	854.5	C48H72O10PN	PS(42:11)		0.00016	0.000357771	0	0	0	0	0.000571429	0.00127775		0.000145455	0.000325246	0	0	0	0	0.00015873	0.000354931		0.00028932	0.000646939	0	0	0	0	0.000394191	0.000881437		0.00163936	0.00366573	0	0	0	0	0.00104943	0.00234661
291	856.5	C48H74O10PN	PS(42:10)		0.00016	0.000357771	0.00016	0.000357771	0	0	0	0		0.000145455	0.000325246	0.000145455	0.000325246	0	0	0	0		0.000344135	0.000769509	0.00020718	0.000463269	0	0	0	0		0.001934	0.00432457	0.00116941	0.00261488	0	0	0	0
292	858.5	C48H76O10PN	PS(42:9)		0	0	0	0	0	0	0	0		0	0	0	0	0	0	0	0		0	0	0	0	0	0	0	0		0	0	0	0	0	0	0	0
293	860.5	C48H78O10PN	PS(42:8)		0.00032	0.000715542	0.00056	0.000876356	0.000285714	0.000638877	0.0004	0.000894427		0.00032	0.000715542	0.000431169	0.000640353	0.00015873	0.000354931	0.000173913	0.000388881		0.000487534	0.00109016	0.000619314	0.000922186	0.000317769	0.000710553	0.000296581	0.000663175		0.00387322	0.00866079	0.00304157	0.00434618	0.000763682	0.00170765	0.000978609	0.00218824
294	862.6	C48H80O10PN	PS(42:7)		0.00272	0.00433036	0.00324	0.00222918	0.000571429	0.00127775	0	0		0.00235879	0.00357144	0.00231247	0.0015142	0.00031746	0.000709863	0	0		0.00417694	0.00625985	0.00454201	0.00365504	0.000635538	0.00142111	0	0		0.0315291	0.050128	0.0234336	0.017197	0.00152736	0.00341529	0	0
295	864.6	C48H82O10PN	PS(42:6)		0	0	0.0002	0.000447214	0.000730159	0.00103844	0.000944444	0.00129696		0	0	0.000142857	0.000319438	0.000323339	0.000442872	0.00032002	0.000438229		0	0	0.000206067	0.00046078	0.000736972	0.00102495	0.000913341	0.0012512		0	0	0.000936082	0.00209314	0.00196228	0.00279479	0.00245309	0.00339821
296	866.6	C48H84O10PN	PS(42:5)		0	0	0.0002	0.000447214	0.000571429	0.00127775	0.0005	0.00111803		0	0	0.000142857	0.000319438	0.000165631	0.000370363	0.00016129	0.000360656		0	0	0.000206067	0.00046078	0.000520152	0.0011631	0.000446121	0.000997557		0	0	0.000936082	0.00209314	0.00254556	0.00569204	0.00108102	0.00241722
297	880.5	C50H74O10PN	PS(44:12)		0	0	0	0	0	0	0	0		0	0	0	0	0	0	0	0		0	0	0	0	0	0	0	0		0	0	0	0	0	0	0	0
298	882.5	C50H76O10PN	PS(44:11)		0.00032	0.000715542	0.0002	0.000447214	0	0	0	0		0.000266667	0.000596285	0.000153846	0.00034401	0	0	0	0		0.000468868	0.00104842	0.000352301	0.000787769	0	0	0	0		0.00370734	0.00828985	0.00139186	0.0031123	0	0	0	0
299	884.5	C50H78O10PN	PS(44:10)		0	0	0	0	0	0	0	0		0	0	0	0	0	0	0	0		0	0	0	0	0	0	0	0		0	0	0	0	0	0	0	0
300	886.6	C50H80O10PN	PS(44:9)		0	0	0.00056	0.000876356	0	0	0	0		0	0	0.000431169	0.000640353	0	0	0	0		0	0	0.000619314	0.000922186	0	0	0	0		0	0	0.00304157	0.00434618	0	0	0	0
301	888.6	C50H82O10PN	PS(44:8)		0	0	0	0	0	0	0	0		0	0	0	0	0	0	0	0		0	0	0	0	0	0	0	0		0	0	0	0	0	0	0	0
302	890.6	C50H84O10PN	PS(44:7)		0	0	0	0	0.00146032	0.00207688	0.0005	0.00111803		0	0	0	0	0.00049485	0.000736729	0.00016129	0.000360656		0	0	0	0	0.00135856	0.0019435	0.000446121	0.000997557		0	0	0	0	0.00494276	0.00677323	0.00108102	0.00241722
303	892.6	C50H86O10PN	PS(44:6)		0.00032	0.000715542	0	0	0	0	0	0		0.00032	0.000715542	0	0	0	0	0	0		0.000487534	0.00109016	0	0	0	0	0	0		0.00387322	0.00866079	0	0	0	0	0	0
304	894.6	C50H88O10PN	PS(44:5)		0	0	0	0	0	0	0	0		0	0	0	0	0	0	0	0		0	0	0	0	0	0	0	0		0	0	0	0	0	0	0	0
305	896.6	C50H90O10PN	PS(44:4)		0.00016	0.000357771	0	0	0	0	0.000666667	0.00149071		0.00016	0.000357771	0	0	0	0	0.000166667	0.000372678		0.0002707	0.000605303	0	0	0	0	0.000763974	0.0017083		0.00178042	0.00398113	0	0	0	0	0.00187089	0.00418343
306	898.6	C50H92O10PN	PS(44:3)		0	0	0	0	0	0	0	0		0	0	0	0	0	0	0	0		0	0	0	0	0	0	0	0		0	0	0	0	0	0	0	0
307	900.7	C50H94O10PN	PS(44:2)		0	0	0	0	0	0	0	0		0	0	0	0	0	0	0	0		0	0	0	0	0	0	0	0		0	0	0	0	0	0	0	0
308	Total PS				0.08304	0.0186024	0.23205	0.0759301	0.430056	0.0719638	0.427603	0.0969469		0.0767224	0.016173	0.171076	0.0583558	0.156042	0.0590309	0.136132	0.0210221		0.143618	0.0414203	0.323072	0.0978407	0.376666	0.0850314	0.38691	0.134501		0.955423	0.252477	1.61763	0.545926	1.17406	0.462169	1.03632	0.259898
309	746.5	C40H76O9PN	ePS(34:2)		0.00048	0.000438178	0.00076	0.00129923	0.000571429	0.00127775	0.00101587	0.00140904		0.000438788	0.000403329	0.000574026	0.000931831	0.000165631	0.000370363	0.00031746	0.0004347		0.000822336	0.000780878	0.000825382	0.00134361	0.000342555	0.000765975	0.000861411	0.00118658		0.00572428	0.00522819	0.00397766	0.00616919	0.000855333	0.00191258	0.00242151	0.00336448
310	748.5	C40H78O9PN	ePS(34:1)		0.00032	0.000438178	0.0008	0.00130384	0.00230159	0.00233555	0.00268254	0.00181883		0.00032	0.000438178	0.000582418	0.000933743	0.00094383	0.00102322	0.000806708	0.000570478		0.000514467	0.00070607	0.000970502	0.0014096	0.0022407	0.00228327	0.00251763	0.00174238		0.00371703	0.00509723	0.00420011	0.00627263	0.00604383	0.00607444	0.00645442	0.0042031
311	772.5	C42H78O9PN	ePS(36:3)		0.00032	0.000438178	0.00101	0.00123511	0	0	0.000571429	0.00127775		0.000278788	0.000382347	0.000730276	0.0008753	0	0	0.00015873	0.000354931		0.000578569	0.000815628	0.00119128	0.00131137	0	0	0.000394191	0.000881437		0.00378767	0.00518843	0.00652677	0.00672309	0	0	0.00104943	0.00234661
312	774.6	C42H80O9PN	ePS(36:2)		0.00048	0.000715542	0.001	0.00141421	0.00187302	0.00235006	0.0030381	0.00187911		0.000436364	0.000650493	0.000747253	0.00106938	0.000654602	0.000690678	0.000995804	0.000705733		0.00097759	0.00151304	0.00146904	0.00231204	0.00142208	0.00146121	0.00264357	0.00174873		0.00550737	0.00850837	0.00604775	0.00922816	0.00367295	0.00374843	0.00703957	0.00446899
313	776.6	C42H82O9PN	ePS(36:1)		0.00048	0.000715542	0.00052	0.000742967	0.0175397	0.00549112	0.0110302	0.00738236		0.000453333	0.000703009	0.000444755	0.000655435	0.00643679	0.00302806	0.0032682	0.00155371		0.000721968	0.00108513	0.000766661	0.00105551	0.0151513	0.0044068	0.010725	0.0092588		0.00572689	0.00861629	0.00373068	0.00537573	0.0446245	0.00710928	0.0279825	0.021937
314	778.6	C42H84O9PN	ePS(36:0)		0	0	0.00036	0.000497996	0	0	0.000571429	0.00127775		0	0	0.000288312	0.000394814	0	0	0.00015873	0.000354931		0	0	0.000413247	0.000565866	0	0	0.000394191	0.000881437		0	0	0.00210549	0.00291242	0	0	0.00104943	0.00234661
315	794.5	C44H76O9PN	ePS(38:6)		0	0	0.0002	0.000447214	0.000857143	0.00127775	0	0		0	0	0.000142857	0.000319438	0.000324362	0.000444318	0	0		0	0	0.000206067	0.00046078	0.000837921	0.00120186	0	0		0	0	0.000936082	0.00209314	0.00330924	0.00551864	0	0
316	796.5	C44H78O9PN	ePS(38:5)		0.00016	0.000357771	0.00032	0.000715542	0	0	0.0004	0.000894427		0.000133333	0.000298142	0.000290909	0.000650493	0	0	0.000173913	0.000388881		0.000234434	0.00052421	0.00041436	0.000926538	0	0	0.000296581	0.000663175		0.00185367	0.00414493	0.00233882	0.00522976	0	0	0.000978609	0.00218824
317	798.6	C44H80O9PN	ePS(38:4)		0.00016	0.000357771	0.00081	0.000854693	0.000857143	0.00127775	0.000571429	0.00127775		0.000133333	0.000298142	0.000597835	0.00060769	0.000324362	0.000444318	0.00015873	0.000354931		0.000234434	0.00052421	0.00101879	0.00101481	0.000837921	0.00120186	0.000394191	0.000881437		0.00185367	0.00414493	0.00470166	0.00447722	0.00330924	0.00551864	0.00104943	0.00234661
318	800.6	C44H82O9PN	ePS(38:3)		0.0016	0.00126491	0.00032	0.000715542	0	0	0.00173333	0.0028906		0.00148848	0.00124791	0.000290909	0.000650493	0	0	0.000507246	0.000749571		0.00276566	0.00222259	0.00041436	0.000926538	0	0	0.00182453	0.00331361		0.0188952	0.0155518	0.00233882	0.00522976	0	0	0.00472038	0.00810175
319	802.6	C44H84O9PN	ePS(38:2)		0.0008	0.000565685	0.00165	0.00179931	0.0036746	0.00243904	0.0029	0.00412916		0.000758788	0.000568897	0.00135548	0.00158559	0.00144692	0.00118714	0.000835203	0.00102087		0.00130892	0.000963543	0.00249228	0.00263085	0.00358388	0.00252536	0.00303463	0.00480762		0.00899047	0.00631855	0.0116827	0.0130101	0.0118201	0.00958033	0.00767229	0.0116875
320	804.6	C44H86O9PN	ePS(38:1)		0.00016	0.000357771	0.0006	0.00134164	0.00414286	0.00469476	0.00184444	0.00205721		0.00016	0.000357771	0.000428571	0.000958315	0.00144175	0.00146159	0.000655224	0.000678397		0.000243767	0.00054508	0.000618201	0.00138234	0.00319171	0.00306455	0.00165604	0.00186054		0.00193661	0.00433039	0.00280825	0.00627943	0.00826656	0.00783065	0.00451271	0.00463797
321	824.6	C46H82O9PN	ePS(40:5)		0	0	0	0	0.000285714	0.000638877	0	0		0	0	0	0	0.00015873	0.000354931	0	0		0	0	0	0	0.000317769	0.000710553	0	0		0	0	0	0	0.000763682	0.00170765	0	0
322	826.6	C46H84O9PN	ePS(40:4)		0	0	0	0	0	0	0.000666667	0.00149071		0	0	0	0	0	0	0.000166667	0.000372678		0	0	0	0	0	0	0.000763974	0.0017083		0	0	0	0	0	0	0.00187089	0.00418343
323	828.6	C46H86O9PN	ePS(40:3)		0.00112	0.00121326	0.00171	0.000978775	0.00219048	0.00276847	0.0115095	0.00944725		0.00109091	0.00122346	0.00120704	0.000625223	0.000818189	0.00100812	0.00359573	0.00275577		0.00187922	0.00180256	0.00230896	0.00105495	0.00209553	0.0025919	0.011677	0.011353		0.0131002	0.0148497	0.0121278	0.0081094	0.00690504	0.00808429	0.0315606	0.0294723
324	830.6	C46H88O9PN	ePS(40:2)		0	0	0	0	0.000285714	0.000638877	0.00106667	0.00153478		0	0	0	0	0.00015873	0.000354931	0.00034058	0.000466534		0	0	0	0	0.000317769	0.000710553	0.00106056	0.00167082		0	0	0	0	0.000763682	0.00170765	0.0028495	0.0042086
325	Total ePS				0.00608	0.00327902	0.01006	0.00721018	0.0345794	0.00912748	0.0396016	0.0212621		0.00569212	0.00333306	0.00768064	0.00559277	0.0128739	0.00654893	0.0121389	0.00418702		0.0102814	0.0050708	0.0131091	0.00708856	0.0303392	0.00999551	0.0382435	0.0286409		0.0710931	0.0416277	0.0635226	0.0325663	0.0903342	0.0229021	0.101211	0.067208
326	658.4	C35H61O8P	PA(32:4)		0	0	0	0	0	0	0	0		0	0	0	0	0	0	0	0		0	0	0	0	0	0	0	0		0	0	0	0	0	0	0	0
327	660.4	C35H63O8P	PA(32:3)		0	0	0	0	0	0	0	0		0	0	0	0	0	0	0	0		0	0	0	0	0	0	0	0		0	0	0	0	0	0	0	0
328	662.4	C35H65O8P	PA(32:2)		0.00016	0.000357771	0.0002	0.000447214	0	0	0	0		0.000145455	0.000325246	0.000142857	0.000319438	0	0	0	0		0.000344135	0.000769509	0.000206067	0.00046078	0	0	0	0		0.001934	0.00432457	0.000936082	0.00209314	0	0	0	0
329	664.5	C35H67O8P	PA(32:1)		0.00096	0.000669328	0.00462	0.00407624	0.0020873	0.00119694	0.00434921	0.00396762		0.000875152	0.00060959	0.00327179	0.00281096	0.000799216	0.000561908	0.00152036	0.00168699		0.00174511	0.00140053	0.00596698	0.00419264	0.00200899	0.00120268	0.00387226	0.00345365		0.010937	0.00748934	0.0312169	0.0249045	0.00654861	0.00454385	0.0110563	0.0101483
330	666.5	C35H69O8P	PA(32:0)		0.00048	0.000438178	0.00101	0.000724914	0.00815079	0.00645983	0.0049254	0.00310125		0.000450909	0.000412691	0.000741265	0.000506073	0.00262397	0.00190891	0.00165853	0.00122355		0.000904154	0.000836339	0.00133751	0.00084034	0.00646366	0.00432024	0.00404621	0.00182423		0.00535378	0.00491501	0.00698255	0.00471472	0.0208024	0.0150495	0.0113867	0.00604905
331	686.4	C37H65O8P	PA(34:4)		0	0	0	0	0	0	0	0		0	0	0	0	0	0	0	0		0	0	0	0	0	0	0	0		0	0	0	0	0	0	0	0
332	688.5	C37H67O8P	PA(34:3)		0.00016	0.000357771	0	0	0	0	0	0		0.000145455	0.000325246	0	0	0	0	0	0		0.00028932	0.000646939	0	0	0	0	0	0		0.00163936	0.00366573	0	0	0	0	0	0
333	690.5	C37H69O8P	PA(34:2)		0	0	0.00166	0.00123612	0.000888889	0.00198762	0.000571429	0.00127775		0	0	0.00119422	0.000836398	0.000329218	0.000736154	0.00015873	0.000354931		0	0	0.00226178	0.00164689	0.000838407	0.00187473	0.000394191	0.000881437		0	0	0.0118596	0.0096387	0.0023972	0.0053603	0.00104943	0.00234661
334	692.5	C37H71O8P	PA(34:1)		0.00432	0.00145327	0.02022	0.0103413	0.0236825	0.0116158	0.0381238	0.00999907		0.00398788	0.00131206	0.0147865	0.00721823	0.00792684	0.00267424	0.0120897	0.00186984		0.00727197	0.00193033	0.027122	0.0102299	0.0194045	0.00485976	0.0340634	0.00916603		0.0494454	0.017374	0.141702	0.0755693	0.0619838	0.0310422	0.0918057	0.0187545
335	710.4	C39H65O8P	PA(36:6)		0.00016	0.000357771	0	0	0	0	0	0		0.000133333	0.000298142	0	0	0	0	0	0		0.000234434	0.00052421	0	0	0	0	0	0		0.00185367	0.00414493	0	0	0	0	0	0
336	712.5	C39H67O8P	PA(36:5)		0	0	0	0	0	0	0	0		0	0	0	0	0	0	0	0		0	0	0	0	0	0	0	0		0	0	0	0	0	0	0	0
337	714.5	C39H69O8P	PA(36:4)		0.00016	0.000357771	0	0	0	0	0	0		0.00016	0.000357771	0	0	0	0	0	0		0.000243767	0.00054508	0	0	0	0	0	0		0.00193661	0.00433039	0	0	0	0	0	0
338	716.5	C39H71O8P	PA(36:3)		0.00032	0.000438178	0.00016	0.000357771	0	0	0	0		0.000278788	0.000382347	0.000145455	0.000325246	0	0	0	0		0.000523754	0.000723713	0.00020718	0.000463269	0	0	0	0		0.00349303	0.00479801	0.00116941	0.00261488	0	0	0	0
339	718.5	C39H73O8P	PA(36:2)		0.004	0.0026533	0.01374	0.0049938	0.00969048	0.00469869	0.0113032	0.00346934		0.00372848	0.00246775	0.0100652	0.00357051	0.00323961	0.00106403	0.00381168	0.00187942		0.00633639	0.00392247	0.0189478	0.00541201	0.0083221	0.00407683	0.0102856	0.00391822		0.0457818	0.0319171	0.0960653	0.0373643	0.0291765	0.0264182	0.0285641	0.0116207
340	738.5	C41H69O8P	PA(38:6)		0	0	0.0002	0.000447214	0	0	0	0		0	0	0.000142857	0.000319438	0	0	0	0		0	0	0.000206067	0.00046078	0	0	0	0		0	0	0.000936082	0.00209314	0	0	0	0
341	740.5	C41H71O8P	PA(38:5)		0	0	0	0	0	0	0	0		0	0	0	0	0	0	0	0		0	0	0	0	0	0	0	0		0	0	0	0	0	0	0	0
342	742.5	C41H73O8P	PA(38:4)		0	0	0.00036	0.000497996	0.00101587	0.00140904	0	0		0	0	0.000299301	0.000410103	0.000330241	0.000452204	0	0		0	0	0.000559481	0.000807913	0.000939356	0.00129859	0	0		0	0	0.00256127	0.00352914	0.00374416	0.00565286	0	0
343	744.5	C41H75O8P	PA(38:3)		0	0	0.00057	0.000790253	0.00123016	0.00118981	0	0		0	0	0.000447159	0.000656943	0.000474854	0.0004341	0	0		0	0	0.00078026	0.00107184	0.00117107	0.00109221	0	0		0	0	0.00488793	0.00670339	0.00323937	0.00311459	0	0
344	746.5	C41H77O8P	PA(38:2)		0.00048	0.000438178	0.00156	0.00183521	0.00215873	0.00123769	0.00257778	0.0028354		0.000438788	0.000403329	0.00117842	0.00132987	0.000813332	0.000561487	0.00083989	0.000852227		0.000822336	0.000780878	0.00208835	0.00245859	0.00191745	0.00120473	0.00258833	0.00312737		0.00572428	0.00522819	0.00908932	0.0100933	0.00612685	0.00465918	0.00707106	0.00779189
345	764.5	C43H71O8P	PA(40:7)		0	0	0	0	0	0	0	0		0	0	0	0	0	0	0	0		0	0	0	0	0	0	0	0		0	0	0	0	0	0	0	0
346	766.5	C43H73O8P	PA(40:6)		0	0	0	0	0	0	0	0		0	0	0	0	0	0	0	0		0	0	0	0	0	0	0	0		0	0	0	0	0	0	0	0
347	768.5	C43H75O8P	PA(40:5)		0	0	0.00016	0.000357771	0	0	0	0		0	0	0.000145455	0.000325246	0	0	0	0		0	0	0.00020718	0.000463269	0	0	0	0		0	0	0.00116941	0.00261488	0	0	0	0
348	Total PA				0.0112	0.00383667	0.04446	0.0226131	0.0489048	0.0185681	0.0618508	0.0133862		0.0103442	0.00340877	0.0325605	0.0159096	0.0165373	0.00393242	0.0200789	0.00540822		0.0187154	0.00461135	0.0598907	0.0226948	0.0410656	0.0100581	0.05525	0.0149805		0.128099	0.0459708	0.308576	0.151438	0.134019	0.0769122	0.150933	0.036029
349	710.5	C36H69O10P	PG(30:1)		0.00752	0.00175271	0.00249	0.00178899	0.0051746	0.0029517	0.00507778	0.00553044		0.00708364	0.00206192	0.0019353	0.0014196	0.00190146	0.00114721	0.0017892	0.00182727		0.0130831	0.00371043	0.00346167	0.00263984	0.00470856	0.00283652	0.00469265	0.00525355		0.0856528	0.0193083	0.0156495	0.0113664	0.0139612	0.00766561	0.0128506	0.0137248
350	712.5	C36H71O10P	PG(30:0)		0.00032	0.000438178	0.00025	0.000559017	0	0	0	0		0.000278788	0.000382347	0.00015625	0.000349386	0	0	0	0		0.000578569	0.000815628	0.000365899	0.000818176	0	0	0	0		0.00378767	0.00518843	0.00254911	0.00569999	0	0	0	0
351	736.5	C38H71O10P	PG(32:2)		0	0	0	0	0	0	0	0		0	0	0	0	0	0	0	0		0	0	0	0	0	0	0	0		0	0	0	0	0	0	0	0
352	738.5	C38H73O10P	PG(32:1)		0.00256	0.00153883	0.00165	0.0024975	0.00260317	0.00258296	0.00247143	0.00307707		0.00240485	0.00145186	0.00117766	0.0017832	0.000977941	0.000893123	0.000816514	0.000988158		0.00461017	0.00346998	0.00198818	0.00252712	0.00215905	0.00200609	0.00202913	0.00275123		0.0300384	0.0192289	0.00866844	0.0115135	0.00563523	0.00539364	0.00527109	0.00662356
353	740.5	C38H75O10P	PG(32:0)		0.00048	0.000438178	0.00126	0.000993982	0.00130159	0.00192581	0.0005	0.00111803		0.000453333	0.000417399	0.000897515	0.000627535	0.0006408	0.001036	0.00016129	0.000360656		0.000748901	0.000686884	0.00170341	0.00135116	0.00137251	0.00210322	0.000446121	0.000997557		0.00557069	0.00509283	0.00953166	0.00956268	0.00348965	0.00515389	0.00108102	0.00241722
354	760.5	C40H71O10P	PG(34:4)		0.0008	0.000565685	0	0	0.0005	0.00111803	0	0		0.000717576	0.000474619	0	0	0.000151515	0.000338798	0	0		0.00134609	0.000862419	0	0	0.000434093	0.000970661	0	0		0.00921731	0.00658165	0	0	0.00127709	0.00285566	0	0
355	762.5	C40H73O10P	PG(34:3)		0.00032	0.000438178	0.00036	0.000497996	0	0	0.0005	0.00111803		0.000290909	0.000398344	0.000299301	0.000410103	0	0	0.00016129	0.000360656		0.000633455	0.000872789	0.000559481	0.000807913	0	0	0.000446121	0.000997557		0.00357337	0.00492068	0.00256127	0.00352914	0	0	0.00108102	0.00241722
356	764.5	C40H75O10P	PG(34:2)		0.00016	0.000357771	0	0	0.000730159	0.00103844	0	0		0.000145455	0.000325246	0	0	0.000323339	0.000442872	0	0		0.00028932	0.000646939	0	0	0.000736972	0.00102495	0	0		0.00163936	0.00366573	0	0	0.00196228	0.00279479	0	0
357	766.5	C40H77O10P	PG(34:1)		0.00112	0.00107331	0.0037	0.00181487	0.00683333	0.00122451	0.00581587	0.00387233		0.00104727	0.000993999	0.00271915	0.00125169	0.00256328	0.00128184	0.00181045	0.00106672		0.00215244	0.00218974	0.00529228	0.00290055	0.00619192	0.00223094	0.00553098	0.0043621		0.0126416	0.0125327	0.0286284	0.0215579	0.0188109	0.00646118	0.0143154	0.0100086
358	768.5	C40H79O10P	PG(34:0)		0	0	0.0006	0.000894427	0.000444444	0.000993808	0.000844444	0.00115897		0	0	0.00043956	0.000645458	0.000164609	0.000368077	0.000332643	0.000456281		0	0	0.000764435	0.00105208	0.000419203	0.000937367	0.000763801	0.00108851		0	0	0.00326403	0.00454938	0.0011986	0.00268015	0.00235068	0.0032931
359	788.5	C42H75O10P	PG(36:4)		0	0	0	0	0	0	0	0		0	0	0	0	0	0	0	0		0	0	0	0	0	0	0	0		0	0	0	0	0	0	0	0
360	790.5	C42H77O10P	PG(36:3)		0	0	0.00016	0.000357771	0	0	0	0		0	0	0.000145455	0.000325246	0	0	0	0		0	0	0.00020718	0.000463269	0	0	0	0		0	0	0.00116941	0.00261488	0	0	0	0
361	792.5	C42H79O10P	PG(36:2)		0	0	0.00045	0.000622495	0.000730159	0.00103844	0.0005	0.00111803		0	0	0.000309524	0.000425918	0.000323339	0.000442872	0.00016129	0.000360656		0	0	0.000605546	0.000896904	0.000736972	0.00102495	0.000446121	0.000997557		0	0	0.00259616	0.00377832	0.00196228	0.00279479	0.00108102	0.00241722
362	794.6	C42H81O10P	PG(36:1)		0	0	0.00111	0.000907193	0.00427778	0.00266736	0.002	0.00447214		0	0	0.000767478	0.000554496	0.0016174	0.00115899	0.000869565	0.00194441		0	0	0.00154452	0.00137702	0.00392692	0.00275306	0.00148291	0.00331588		0	0	0.0088638	0.00977182	0.0117634	0.00766563	0.00489304	0.0109412
363	812.5	C44H75O10P	PG(38:6)		0.00016	0.000357771	0	0	0	0	0	0		0.00016	0.000357771	0	0	0	0	0	0		0.0002707	0.000605303	0	0	0	0	0	0		0.00178042	0.00398113	0	0	0	0	0	0
364	814.5	C44H77O10P	PG(38:5)		0	0	0	0	0	0	0	0		0	0	0	0	0	0	0	0		0	0	0	0	0	0	0	0		0	0	0	0	0	0	0	0
365	Total PG				0.01344	0.00273642	0.01203	0.00460619	0.0225952	0.00873861	0.0177095	0.0125752		0.0125818	0.00300127	0.00884718	0.00338424	0.00866369	0.0052731	0.00610224	0.00455752		0.0237127	0.00820706	0.0164926	0.00463189	0.0206862	0.0106546	0.0158378	0.0108942		0.153902	0.0353207	0.0834817	0.0307468	0.0600607	0.0246468	0.0429239	0.0266928
366	Total Routine Polar Lipids				8.78259	0.62258	14.8568	4.16896	40.5801	16.1321	41.9208	8.76344		8.167	0.797649	10.9844	3.34929	14.4507	5.80043	13.6588	3.4493		15.1762	2.55262	20.6919	4.56834	34.2117	8.35579	36.8049	4.65156		100	0	100	0	100	0	100	0
367	249.185	C16H25O2	16:3		0.00955493	0.0213655	0.0081847	0.0183016	0	0	0	0		0.0086863	0.0194232	0.00629593	0.0140781	0	0	0	0		0.0172777	0.0386341	0.0144174	0.0322383	0	0	0	0		0.0242389	0.0541999	0.0259137	0.0579449	0	0	0	0
368	251.2	C16H27O2	16:2		0.0805776	0.014444	0.0563773	0.0362324	0.118791	0.0841913	0.0943766	0.10105		0.075015	0.0147213	0.0429976	0.027946	0.0362862	0.024101	0.027359	0.0299163		0.140365	0.0425821	0.0762414	0.0435901	0.0933286	0.0561243	0.0790561	0.0772982		0.197915	0.0619237	0.124938	0.0718	0.18549	0.112474	0.168808	0.162524
369	253.216	C16H29O2	16:1		0.549447	0.159559	0.652057	0.34895	0.781959	0.400764	0.894755	0.457403		0.511152	0.153236	0.494471	0.308174	0.251317	0.08694	0.310651	0.200193		0.915475	0.150944	0.857699	0.314759	0.642465	0.265662	0.741934	0.2791		1.28831	0.209519	1.35257	0.419923	1.27843	0.367584	1.42532	0.427128
370	255.232	C16H31O2	16:0		13.6102	0.785266	12.2874	1.06095	16.514	1.87978	16.5121	1.72987		12.6851	1.49751	8.99856	1.05874	5.86168	1.42888	5.44793	1.50077		23.5654	4.25835	17.3985	2.68196	14.4615	2.46341	14.6826	1.92461		33.1868	6.11963	28.1424	6.09069	30.2491	7.01252	29.5148	7.24165
371	277.216	C18H29O2	18:3		0	0	0	0	0	0	0.01627	0.0363808		0	0	0	0	0	0	0.0040675	0.00909521		0	0	0	0	0	0	0.0186448	0.0416911		0	0	0	0	0	0	0.0432039	0.0966069
372	279.232	C18H31O2	18:2		0.350165	0.34403	0.500379	0.485246	0.532584	0.568044	0.671652	0.823622		0.336013	0.351694	0.391633	0.40097	0.158621	0.165784	0.243811	0.332535		0.570354	0.503361	0.615706	0.526213	0.458908	0.519378	0.495301	0.588912		0.794191	0.680485	0.955575	0.786934	0.81398	0.845833	0.904487	1.00967
373	281.247	C18H33O2	18:1		4.92441	1.88191	7.08797	4.0431	8.6801	5.3404	9.3341	5.85943		4.6025	1.86577	5.38005	3.55077	2.71739	1.32213	3.27272	2.50176		8.11974	2.40512	9.26562	3.80582	7.03962	3.83587	7.58877	3.68228		11.4016	3.2714	14.5716	5.19564	13.7566	5.96067	14.4244	5.74869
374	283.263	C18H35O2	18:0		16.9286	0.610692	16.5937	1.453	22.1101	2.96401	21.8837	2.97513		15.7588	1.48114	12.1457	1.37715	7.76146	1.37493	7.242	2.16428		29.1667	3.89422	23.5075	3.72412	19.272	2.91339	19.3334	1.71877		41.0767	5.64617	38.0048	8.21653	40.1379	7.28313	38.7465	7.9032
375	303.232	C20H31O2	20:4		5.44101	4.0356	8.39726	5.56292	8.68585	6.54752	9.68708	7.08314		5.05182	3.70164	6.34897	4.66851	2.66163	1.81296	3.49402	3.00372		8.5524	5.81264	10.8553	6.10285	6.84611	4.50314	7.90853	5.3837		12.0303	8.24944	16.7976	8.56815	13.4523	8.19407	14.6188	9.0382
376	327.232	C22H31O2	22:6		0	0	0.0090106	0.0201483	0.0675524	0.0471653	0.0836136	0.0531727		0	0	0.00600707	0.0134322	0.0236159	0.0140845	0.0272108	0.0200735		0	0	0.0143982	0.0321953	0.0632343	0.0421773	0.0741125	0.0550753		0	0	0.0245631	0.0549247	0.126172	0.0761608	0.153612	0.126163
377	Total FFA				41.8939	6.23532	45.5923	11.6329	57.4909	16.823	59.1777	17.9845		39.0291	6.97999	33.8146	11.1595	19.472	2.14944	20.0698	9.55282		71.0477	1.90018	62.6055	5.83815	48.8772	9.76764	50.9223	6.98793		100	0	100	0	100	0	100	0
378	640.601	C43H78NO2	C16:1 CE		0.0530497	0.0043318	0.0703743	0.00924769	0.331545	0.0413957	0.151159	0.0669467		0.0491817	0.00306716	0.051854	0.00995604	0.118915	0.034598	0.0465159	0.012954		0.0921881	0.0204513	0.100655	0.0260007	0.291274	0.0581935	0.136612	0.0726433		26.0191	2.63726	26.735	2.49441	12.4111	1.6422	18.4696	4.08213
379	642.617	C43H80NO2	C16:0 CE		0.0627183	0.0188277	0.0886773	0.0107249	0.720488	0.117792	0.292023	0.0363956		0.0574862	0.0128459	0.0647646	0.00750785	0.256349	0.0671123	0.0942127	0.0131007		0.106236	0.0235167	0.125669	0.0226686	0.625563	0.0917671	0.264896	0.073398		30.4146	7.08048	33.9932	5.33926	26.8259	3.01603	37.9614	5.41768
380	668.632	C45H82NO2	C18:1 CE		0.0754331	0.0109284	0.090524	0.0294093	1.4134	0.312453	0.289924	0.0967294		0.0704811	0.013871	0.0665203	0.0226743	0.523649	0.23462	0.0906985	0.0188639		0.129906	0.025465	0.133726	0.0630914	1.2571	0.416956	0.259103	0.0948586		36.845	4.45522	33.5944	6.37764	51.9597	4.34816	36.038	4.27892
381	670.648	C45H84NO2	C18:0 CE		0.0136946	0.00627999	0.0149116	0.00478299	0.239635	0.0532021	0.0577455	0.0165655		0.0130519	0.006689	0.0113794	0.00538931	0.0865986	0.0306754	0.0190617	0.00778988		0.0237297	0.0108263	0.0214681	0.00845567	0.209633	0.0540616	0.0523538	0.0201489		6.72123	3.00217	5.67742	1.80473	8.80339	0.550822	7.53093	2.42653
382	Total Cholesterol esters				0.204896	0.0188638	0.264487	0.0387112	2.70506	0.460938	0.790851	0.194555		0.190201	0.0176777	0.194518	0.0372327	0.985511	0.36314	0.250489	0.0346297		0.35206	0.0501009	0.381519	0.111353	2.38357	0.60175	0.712965	0.243092		100	0	100	0	100	0	100	0
383	556.492	C33H66O5N	30:1		0.00999634	0.00961613	0.0332904	0.0193755	0.0495193	0.0142973	0.0547707	0.0226435		0.00949572	0.00935081	0.0238907	0.0117923	0.0173164	0.00468138	0.0174744	0.0057591		0.015507	0.0147847	0.0461879	0.0275223	0.0425127	0.00986206	0.0473949	0.0125654		0.796	0.770061	2.37743	1.47306	1.67509	0.298974	2.03965	0.697638
384	584.524	C35H70O5N	32:1		0.0405405	0.00581866	0.220728	0.0823571	0.69112	0.259666	0.849693	0.161629		0.0379308	0.00780073	0.159187	0.0590028	0.240498	0.0867601	0.272547	0.0458394		0.069434	0.00954318	0.318133	0.14343	0.589683	0.198916	0.765768	0.2308		3.31619	0.573919	14.8111	4.25872	23.1263	5.5221	31.398	0.522352
385	586.539	C35H72O5N	32:0		0.0056765	0.00564254	0.0021515	0.00343754	0	0	0.00397018	0.0054451		0.00548248	0.00565303	0.00179262	0.00310341	0	0	0.0013463	0.00184358		0.00895417	0.00907573	0.0028829	0.00448184	0	0	0.00384416	0.00527019		0.466075	0.485684	0.18878	0.313539	0	0	0.173146	0.240517
386	606.508	C37H68O5N	34:4		0.763864	0.150991	0.483304	0.214962	1.2104	0.190515	0.76708	0.178099		0.710365	0.14222	0.34733	0.130865	0.452531	0.223279	0.24584	0.0479711		1.3451	0.442166	0.713879	0.402655	1.09564	0.3857	0.704296	0.288137		62.983	15.9417	32.9232	11.1769	42.6392	11.0504	28.3929	3.5232
387	608.524	C37H70O5N	34:3		0.0371263	0.0431167	0.0428842	0.0427374	0.0269987	0.0335473	0.0490718	0.0295868		0.0336476	0.0371182	0.0323656	0.0325808	0.00884276	0.0111941	0.0173842	0.0119933		0.056297	0.0628988	0.051997	0.0468667	0.0209203	0.0265662	0.0408172	0.0246383		2.7765	3.00731	3.04534	2.83398	0.807272	0.972137	1.96217	1.26693
388	610.539	C37H72O5N	34:2		0.0682806	0.00742392	0.275504	0.0816168	0.374629	0.185635	0.540588	0.162927		0.0638456	0.0106016	0.199505	0.0559204	0.128616	0.0494242	0.170191	0.0333893		0.118812	0.0267144	0.398727	0.161416	0.307631	0.07376	0.488629	0.198997		5.63423	1.12804	18.6511	3.58119	12.4556	4.24126	19.6187	2.77009
389	612.555	C37H74O5N	34:1		0.0173595	0.00706136	0.0652408	0.0139525	0.066844	0.025732	0.116021	0.0309227		0.0159924	0.00616546	0.0474365	0.00980181	0.0242063	0.0106303	0.0372567	0.00876336		0.0294258	0.0110633	0.0951144	0.0355881	0.0571368	0.0181151	0.101996	0.020912		1.3944	0.500923	4.51786	0.890816	2.24267	0.599279	4.28624	0.675704
390	630.508	C39H68O5N	36:6		0.00811606	0.00643925	0.00432116	0.00324793	0.00858266	0.00630418	0.00603806	0.00709824		0.00756413	0.00597355	0.00336873	0.00265566	0.00281262	0.00202641	0.00199462	0.00227558		0.0127072	0.00931607	0.00566902	0.00360718	0.00696471	0.00478238	0.0049157	0.00629887		0.633596	0.478788	0.305603	0.239678	0.27523	0.172144	0.21576	0.255417
391	632.524	C39H70O5N	36:5		0.0109706	0.0124815	0.0102242	0.0115215	0.00366307	0.00414907	0.00679009	0.00792295		0.00995147	0.0111076	0.00783011	0.00875712	0.00129239	0.00152551	0.00263871	0.0034261		0.0167721	0.01823	0.0121236	0.0119453	0.00318589	0.00393307	0.00562935	0.00641747		0.81538	0.89676	0.707361	0.730409	0.117457	0.125483	0.287123	0.336861
392	634.539	C39H72O5N	36:4		0.0693975	0.0639557	0.0712898	0.0534414	0.0439964	0.0310922	0.0445086	0.032757		0.0628313	0.0533666	0.0533288	0.0405709	0.0140955	0.00992733	0.0152253	0.0108489		0.108056	0.0912919	0.0903061	0.0491113	0.0353161	0.0227964	0.0355236	0.0226119		5.24199	4.30636	4.95161	3.30691	1.42281	0.854278	1.69926	1.11446
393	636.555	C39H74O5N	36:3		0.0807518	0.0725655	0.0900691	0.0591362	0.0541784	0.0393801	0.0533871	0.0339888		0.0734743	0.0617753	0.0670901	0.0448671	0.0172872	0.0130287	0.0187047	0.0128432		0.12567	0.103426	0.116206	0.0549766	0.0434078	0.0301611	0.0441171	0.0275961		6.11901	4.95522	6.32232	3.7956	1.75962	1.12519	2.12561	1.41095
394	638.57	C39H76O5N	36:2		0.0231014	0.0100369	0.0502574	0.010231	0.0372643	0.0179898	0.0312909	0.0053286		0.0212364	0.00808961	0.0363824	0.0047886	0.0128074	0.00546202	0.0102296	0.00257785		0.038243	0.0117647	0.0721706	0.0222938	0.0323788	0.0162213	0.0284137	0.00815114		1.83522	0.596463	3.48061	0.553899	1.29981	0.715823	1.18046	0.228473
395	640.586	C39H78O5N	36:1		0.0521432	0.0043103	0.0684028	0.00950381	0.33009	0.0418175	0.149934	0.0669569		0.0483484	0.00321645	0.0504269	0.0100732	0.118415	0.0346481	0.0461154	0.0130049		0.0906872	0.0206121	0.0978242	0.0257715	0.290009	0.0583945	0.1355	0.0724915		4.27554	0.694362	4.83618	1.11442	11.4103	1.47231	5.35879	1.52878
396	656.524	C41H70O5N	38:7		0.0089492	0.00830537	0.00427209	0.00560222	0.00542127	0.00615749	0.00287798	0.0034909		0.00802879	0.00672585	0.00338285	0.00441656	0.00197167	0.00229661	0.000861996	0.000940181		0.0142466	0.0114418	0.00493811	0.0062598	0.00496668	0.00588868	0.0022594	0.00227991		0.681702	0.534733	0.303548	0.394086	0.179772	0.184976	0.0996826	0.107471
397	658.539	C41H72O5N	38:6		0.00749408	0.00816869	0.0053141	0.00405912	0.00412619	0.0032157	0.00777429	0.00362527		0.00665242	0.00671852	0.00418388	0.00349058	0.00129072	0.00087131	0.00267275	0.00155115		0.0116927	0.0119303	0.00701089	0.0049316	0.00324841	0.00217654	0.00704657	0.00412258		0.553136	0.548554	0.389713	0.328604	0.141552	0.109796	0.320016	0.22644
398	660.555	C41H74O5N	38:5		0.0015743	0.00352025	0.000127879	0.000285946	9.65391e-06	2.15868e-05	0.00161304	0.00243375		0.0015743	0.00352025	9.83685e-05	0.000219959	3.57552e-06	7.99511e-06	0.000489181	0.000699931		0.00239852	0.00536326	0.00022526	0.000503696	9.10564e-06	2.03608e-05	0.00129632	0.00181039		0.126279	0.282368	0.008951	0.020015	0.000295478	0.000660709	0.0614891	0.0851628
399	662.57	C41H76O5N	38:4		0.00458013	0.00492408	0.00574174	0.00751051	0.00109015	0.00243764	0.00197883	0.00257223		0.00412285	0.00407618	0.00401536	0.00529899	0.000403757	0.000902829	0.000780276	0.00113247		0.00705546	0.00710491	0.00686456	0.00780597	0.00102823	0.0022992	0.00158391	0.00194486		0.344771	0.333246	0.362251	0.42106	0.0333662	0.0746091	0.0814041	0.104129
400	664.586	C41H78O5N	38:3		0.0116759	0.0117022	0.0136944	0.0133765	0.00820386	0.00833339	0.0143573	0.010746		0.0105142	0.0096835	0.0103923	0.00994171	0.00260751	0.00242557	0.0052726	0.00504151		0.0183896	0.0167526	0.0168729	0.012913	0.00726892	0.00776673	0.0118171	0.00752854		0.894527	0.797691	0.932236	0.788865	0.288582	0.31675	0.56354	0.437399
401	684.555	C43H74O5N	40:7		0.00822679	0.00715775	0.00763225	0.00981236	0.00106179	0.00232852	0	0		0.00744829	0.00586656	0.00587564	0.00732604	0.000392148	0.000863	0	0		0.013149	0.00995265	0.00884072	0.0102301	0.00100025	0.00219693	0	0		0.637575	0.472834	0.519898	0.603625	0.0326566	0.0711868	0	0
402	686.57	C43H76O5N	40:6		0.00467825	0.00373012	0.00297753	0.00192968	0.00199538	0.00101265	0.00362085	0.00297995		0.00417704	0.00313692	0.00216581	0.00144872	0.000766867	0.000584813	0.00115653	0.000970477		0.00789862	0.00562072	0.00416704	0.00305339	0.00175009	0.00102055	0.00327493	0.00289272		0.364364	0.255006	0.214959	0.150735	0.0683813	0.0335474	0.127278	0.10785
403	688.586	C43H78O5N	40:5		0.00144443	0.00173677	0.00222574	0.00224038	0.000670459	0.000399165	0.000218642	0.000488899		0.00134561	0.00165598	0.00162104	0.00160385	0.000252124	0.000210197	9.50618e-05	0.000212565		0.00220882	0.00257957	0.00270879	0.00228669	0.000592783	0.000416151	0.000162113	0.000362495		0.110519	0.132179	0.149909	0.128114	0.0240306	0.0146783	0.00869589	0.0194446
404	Total DAG 16:1 acyl containing				1.23595	0.154114	1.45965	0.286593	2.91986	0.463758	2.70558	0.510902		1.14403	0.103413	1.06167	0.175993	1.04641	0.305768	0.868276	0.147952		2.11271	0.229814	2.07285	0.515246	2.54465	0.44519	2.43428	0.711973		100	0	100	0	100	0	100	0
405	556.492	C33H66O5N	30:1		0.0463109	0.0169606	0.0377791	0.0141098	0.0223897	0.0134647	0.0351399	0.0189671		0.0426478	0.0134835	0.0272702	0.00910899	0.00722183	0.00391346	0.0120173	0.00794276		0.0769775	0.0182362	0.0515714	0.0116878	0.0191222	0.0120118	0.0304696	0.0152712		6.57187	2.06727	2.37821	0.676752	0.768927	0.519474	0.947568	0.461105
406	584.524	C35H70O5N	32:1		0.0711543	0.0252644	0.13833	0.0326962	0.198545	0.0580246	0.326618	0.0465481		0.0663965	0.0245773	0.0993129	0.0133276	0.0676732	0.0130085	0.106376	0.0238428		0.117896	0.0282374	0.196828	0.0554733	0.168461	0.0333036	0.293307	0.068356		10.139	3.49296	8.70718	1.3692	6.7308	0.906733	8.96463	0.431879
407	586.539	C35H72O5N	32:0		0.173518	0.214038	0.496891	0.133253	1.18431	0.421303	1.4631	0.242103		0.159329	0.193744	0.357871	0.0827223	0.411269	0.132179	0.471641	0.0815571		0.339967	0.478925	0.719797	0.273001	1.00525	0.281266	1.32496	0.38363		21.4279	21.2746	30.7946	3.72913	39.5309	3.41135	40.0183	0.763954
408	606.508	C37H68O5N	34:4		0.001513	0.00178639	0.00138639	0.00152937	0.00139883	0.00140596	0.000997412	0.00223028		0.00143481	0.00178813	0.00103977	0.00118636	0.000521558	0.00047895	0.000433657	0.000969687		0.00239159	0.00275117	0.00191977	0.00214308	0.0011576	0.00109552	0.000739533	0.00165365		0.224343	0.254157	0.103778	0.123296	0.0430892	0.0394137	0.029898	0.066854
409	608.524	C37H70O5N	34:3		0.00926043	0.00418964	0.00390442	0.0035911	0.0143489	0.00887156	0.0100789	0.00428578		0.00879933	0.00449103	0.00307763	0.00293704	0.00574455	0.00491202	0.00321083	0.00129693		0.0160738	0.00765941	0.00604404	0.00564682	0.0137733	0.0100959	0.0097379	0.00597504		1.33288	0.721565	0.277528	0.278332	0.559873	0.445886	0.2873	0.151667
410	610.539	C37H72O5N	34:2		0.0429292	0.0103536	0.0423754	0.0139246	0.0725089	0.0215476	0.0740523	0.0265839		0.0399164	0.00979608	0.0311001	0.0104114	0.0258029	0.00863007	0.0248775	0.0112056		0.0728019	0.0140013	0.0578644	0.00718533	0.06199	0.011492	0.0628497	0.0120877		6.02899	1.33783	2.7041	0.784264	2.49979	0.500444	2.06233	0.752021
411	612.555	C37H74O5N	34:1		0.206074	0.0274286	0.632292	0.139416	1.27284	0.302868	1.55102	0.303356		0.191339	0.0256549	0.457973	0.0846202	0.446201	0.105104	0.498015	0.0876888		0.350401	0.0127108	0.915529	0.319642	1.09126	0.161344	1.40971	0.457297		29.7892	7.66257	39.6492	3.52693	43.6852	2.56266	42.2702	2.06218
412	630.508	C39H68O5N	36:6		0.00953808	0.00758527	0.00785531	0.0107675	0.00325048	0.00614833	0.0153959	0.00910815		0.00864429	0.00625905	0.00634904	0.00874601	0.00169837	0.00344856	0.00527074	0.00327708		0.0151865	0.011273	0.00909593	0.0125193	0.00351133	0.00686571	0.0137381	0.00964395		1.40624	0.973785	0.568815	0.817647	0.155066	0.303653	0.446316	0.307287
413	632.524	C39H70O5N	36:5		0.00161435	0.0019264	0.00433492	0.00420479	0.00484201	0.0031164	0.00208632	0.00248954		0.00159521	0.00193383	0.00340636	0.00333899	0.00177812	0.00111823	0.000644757	0.000665556		0.00267498	0.00294954	0.00543714	0.00461186	0.00428156	0.00291536	0.00211262	0.00288048		0.227353	0.27435	0.296484	0.301975	0.168034	0.118106	0.0572036	0.0619394
414	634.539	C39H72O5N	36:4		0.00673335	0.00687585	0.00779796	0.00577254	0.00628954	0.00651531	0.00897616	0.0105433		0.00599891	0.00559708	0.00604067	0.00496732	0.00236479	0.00243876	0.00342167	0.00479145		0.0109139	0.009755	0.0100162	0.00597085	0.00577618	0.00626154	0.00713481	0.00747683		0.868319	0.771434	0.538658	0.481369	0.205527	0.18201	0.261274	0.319501
415	636.555	C39H74O5N	36:3		0.00860621	0.00706031	0.0121334	0.00939038	0.0121291	0.00892181	0.00935195	0.0056435		0.00770328	0.00575145	0.00877047	0.00649291	0.00375462	0.00234219	0.00320959	0.00194129		0.014019	0.0104064	0.0155399	0.0103465	0.00951996	0.00554766	0.00770816	0.00451078		1.27031	0.995706	0.775013	0.538393	0.398903	0.256237	0.261533	0.148998
416	638.57	C39H76O5N	36:2		0.0171553	0.0165015	0.0320125	0.0107365	0.0106232	0.0098805	0.00979989	0.010296		0.0158122	0.0151591	0.0234561	0.00757201	0.00364155	0.0035986	0.003548	0.00380313		0.0266477	0.0237235	0.0465597	0.0194031	0.009712	0.00941775	0.00903267	0.0111016		2.29358	1.99385	2.12498	0.913253	0.357008	0.285422	0.31067	0.373819
417	640.586	C39H78O5N	36:1		0.0708355	0.0156203	0.109635	0.0313905	0.122207	0.0344601	0.131119	0.0222911		0.0658486	0.0148327	0.078583	0.0171308	0.0425883	0.0105478	0.0429786	0.0117358		0.119269	0.0111633	0.154263	0.041301	0.104348	0.0190578	0.115701	0.0155336		10.1366	2.54483	6.81129	0.986206	4.17948	0.574999	3.61294	0.52461
418	656.524	C41H70O5N	38:7		0.0204644	0.0142359	0.0263331	0.00919611	0	0	0	0		0.0190631	0.0130989	0.0191563	0.00629194	0	0	0	0		0.0331812	0.0206077	0.0358803	0.00729815	0	0	0	0		2.69569	1.89774	1.68795	0.555788	0	0	0	0
419	658.539	C41H72O5N	38:6		0.00823055	0.00762833	0.0079243	0.00746527	0.0122153	0.007284	0.00220426	0.00149878		0.00786331	0.00773954	0.00581018	0.00541327	0.00403332	0.0019455	0.000796017	0.000643437		0.0130862	0.011206	0.00974009	0.008231	0.0100165	0.00480649	0.00181754	0.00117721		1.16806	1.0142	0.514849	0.443813	0.398109	0.192776	0.0625311	0.0432715
420	660.555	C41H74O5N	38:5		0.00107648	0.00198715	0.000565601	0.00119709	0.00051543	0.000711704	0.00309317	0.00554104		0.0010655	0.00199245	0.000509386	0.00109053	0.000172237	0.000245157	0.0012847	0.00241848		0.001651	0.0030236	0.00072587	0.00155316	0.000406479	0.000601209	0.00237427	0.00410487		0.147506	0.269755	0.05195	0.112576	0.0136028	0.0189842	0.0890133	0.166647
421	662.57	C41H76O5N	38:4		0.000933524	0.000975611	0.00170496	0.00188162	0.000982102	0.00172344	0.0018854	0.00230417		0.00085916	0.000918937	0.00123552	0.00128433	0.000398221	0.000641678	0.000668551	0.000757349		0.0014467	0.00146006	0.00227714	0.0027409	0.000957789	0.00162591	0.00166738	0.00204782		0.13052	0.12659	0.119594	0.132035	0.0311542	0.0483228	0.0504354	0.053935
422	664.586	C41H78O5N	38:3		0.00393145	0.0060461	0.00360353	0.00359733	0.00192358	0.00196895	0.000369334	0.000825856		0.00342025	0.00498769	0.0027314	0.00259388	0.00063064	0.000700626	0.000102593	0.000229404		0.00602077	0.00873223	0.0045583	0.00361432	0.00165441	0.00185799	0.000254779	0.000569703		0.474705	0.696207	0.225345	0.197819	0.0602832	0.0629408	0.00984041	0.0220038
423	684.555	C43H74O5N	40:7		0.0173234	0.0137403	0.014648	0.00668174	0	0	0	0		0.015779	0.0116976	0.0108227	0.00500202	0	0	0	0		0.0274526	0.0188158	0.0199681	0.00825218	0	0	0	0		2.36617	1.53949	0.976181	0.530038	0	0	0	0
424	686.57	C43H76O5N	40:6		0.00783786	0.00482263	0.0106078	0.0125514	0.0054749	0.00558223	0.00791096	0.00734396		0.00715873	0.00423261	0.00799296	0.00907404	0.00184087	0.00180979	0.00264042	0.00254428		0.0128641	0.00651733	0.0127429	0.0125254	0.00492664	0.00524789	0.0071594	0.00768432		1.07606	0.583917	0.664996	0.696892	0.187878	0.203866	0.238591	0.257472
425	688.586	C43H78O5N	40:5		0.00193401	0.00432457	0.000557537	0.00124669	0.000953271	0.00213158	0.00059174	0.000815203		0.00161167	0.00360381	0.000398241	0.000890494	0.000353063	0.000789473	0.000232342	0.000318189		0.00283373	0.00633642	0.00057445	0.00128451	0.000899132	0.00201052	0.000538249	0.000775823		0.224787	0.502639	0.0293473	0.0656225	0.0263465	0.0589125	0.0194231	0.0271923
426	Total DAG 16:0 acyl containing				0.726974	0.181454	1.59267	0.314572	2.94776	0.837405	3.65379	0.583776		0.672286	0.152724	1.15291	0.17345	1.02769	0.266507	1.18137	0.223295		1.26376	0.442708	2.27693	0.633559	2.51702	0.506099	3.30101	0.90458		100	0	100	0	100	0	100	0
427	556.492	C33H66O5N	30:1		0.0114829	0.0101556	0.00237021	0.00376612	0.00165369	0.00231793	0.000934915	0.00209053		0.0106128	0.00960244	0.00165841	0.00269726	0.000557181	0.000813114	0.000259699	0.000580704		0.0201139	0.0193994	0.0027103	0.00380914	0.0013237	0.00201682	0.000644936	0.00144212		3.98075	5.8781	0.493877	0.487996	0.545593	0.767884	0.317005	0.708845
428	584.524	C35H70O5N	32:1		0.00224951	0.00272986	0.00231707	0.00317336	0.00384319	0.00327904	0.00442948	0.00561095		0.00202997	0.00230499	0.00187739	0.00259439	0.00124036	0.000903703	0.00173806	0.00252935		0.00340667	0.00399511	0.00268929	0.00371248	0.00316981	0.00266723	0.00352784	0.00405246		0.332593	0.304687	0.334993	0.485314	2.35921	2.09987	1.98366	1.58755
429	586.539	C35H72O5N	32:0		0.0146435	0.00858023	0.00607777	0.00457689	0.00327965	0.00462083	0.00418921	0.00672691		0.0134414	0.00729287	0.00481668	0.00403948	0.00118817	0.00145267	0.00144851	0.00240841		0.0236775	0.0109532	0.00823924	0.0062455	0.00247491	0.00295131	0.00436875	0.00711568		3.50305	0.771127	1.71179	1.90094	2.68375	4.04327	3.69219	5.24597
430	606.508	C37H68O5N	34:4		0.0351811	0.0358803	0.0379704	0.035976	0.00996971	0.00805917	0.0123923	0.0107769		0.0313393	0.0291434	0.0286848	0.0273621	0.00316943	0.0026786	0.00467215	0.00484106		0.0560475	0.0503234	0.0464981	0.037761	0.00820231	0.00698152	0.0103039	0.00852474		7.33566	2.52397	7.1196	3.75247	4.59285	4.34297	4.69746	3.44939
431	608.524	C37H70O5N	34:3		0.0175712	0.0186671	0.0188855	0.0163624	0.00941632	0.0137806	0.00329436	0.0055738		0.0160919	0.0163606	0.0141781	0.0124595	0.00323856	0.00503023	0.00123255	0.00199848		0.0268004	0.0273319	0.0233774	0.0160795	0.00786308	0.0127287	0.00323976	0.00586511		2.85542	2.40206	4.43425	1.3878	3.15068	4.56517	1.2093	2.11567
432	610.539	C37H72O5N	34:2		0.0030091	0.00537837	0.00077168	0.00172553	0.00290372	0.00317255	0.00153005	0.00289526		0.00292129	0.00538959	0.0005512	0.00123252	0.000964333	0.00115756	0.000649723	0.00126284		0.00455376	0.00819715	0.000795089	0.00177787	0.0025122	0.00301218	0.00119636	0.00213695		0.531535	1.06737	0.0805134	0.180033	1.28833	1.39511	0.504146	0.929843
433	612.555	C37H74O5N	34:1		0	0	0.000506156	0.0011318	0.000249383	0.000557636	0.00191979	0.00349236		0	0	0.000460142	0.00102891	9.23639e-05	0.000206532	0.000786083	0.00152874		0	0	0.00065541	0.00146554	0.00023522	0.000525967	0.00140745	0.00259179		0	0	0.0941598	0.210548	0.0833079	0.186282	0.62338	1.12373
434	630.508	C39H68O5N	36:6		0.0139448	0.0132611	0.00583637	0.00735771	0.00552562	0.00534358	0.0042744	0.00549058		0.0129105	0.0123604	0.00417617	0.00530542	0.00183831	0.00163338	0.00139456	0.00181326		0.0251239	0.0273837	0.00741844	0.00795452	0.0048491	0.00474106	0.00412197	0.0049715		5.38127	8.7143	1.54171	1.74162	3.00272	2.3974	3.50126	3.81974
435	632.524	C39H70O5N	36:5		0.0210132	0.00720939	0.0115986	0.00693163	0.00236945	0.00393667	0.00248449	0.00190833		0.0191897	0.00505369	0.008931	0.00606306	0.000755332	0.00120058	0.000906876	0.000776188		0.0358222	0.0103951	0.0155045	0.00820818	0.0020987	0.00342431	0.00229238	0.00178012		6.46083	4.21627	3.20134	2.09923	1.08783	1.95655	1.71211	1.36585
436	634.539	C39H72O5N	36:4		0.071235	0.0717308	0.0711504	0.0622138	0.0346866	0.0232755	0.0368916	0.0150404		0.0641921	0.0592724	0.0528867	0.045508	0.0113067	0.00646236	0.0126283	0.00627107		0.110572	0.101948	0.0886863	0.0598876	0.0279435	0.0159892	0.0313947	0.0111722		12.8261	4.98476	16.0586	2.47921	17.8846	6.7769	21.8771	10.1514
437	636.555	C39H74O5N	36:3		0.00869658	0.0054168	0.0107225	0.0084751	0	0	0	0		0.00806666	0.0049396	0.00788786	0.00615077	0	0	0	0		0.0145965	0.00885514	0.0135505	0.00873869	0	0	0	0		2.49201	2.48088	2.52834	0.632791	0	0	0	0
438	638.57	C39H76O5N	36:2		0.00520694	0.00390325	0.00433285	0.00500725	0.00244093	0.0023335	0.001906	0.00263116		0.00465978	0.00318345	0.00353853	0.00444895	0.000739228	0.000666482	0.000732361	0.00105126		0.00864643	0.00586443	0.00537605	0.00608759	0.00208818	0.00216764	0.00154268	0.00211248		1.40889	1.11583	0.923188	0.739645	1.39891	1.87132	0.870281	1.24095
439	640.586	C39H78O5N	36:1		0.00621642	0.00619171	0.00317431	0.00220189	0.00114272	0.00139771	0.00324794	0.00338793		0.0055959	0.00509103	0.00218226	0.00130855	0.000406934	0.000420098	0.0012149	0.00135195		0.00977744	0.00878783	0.00439717	0.0031368	0.000878133	0.000878334	0.00281957	0.0032375		1.207	0.501377	1.29971	1.37685	0.789566	1.01917	1.13722	1.21357
440	656.524	C41H70O5N	38:7		0.00826005	0.00732049	0.00368968	0.00575017	0.00286187	0.00392245	0.00118793	0.00194774		0.00743862	0.006166	0.00255532	0.00411037	0.000960358	0.00131989	0.000375662	0.000558231		0.0130859	0.0103614	0.00425058	0.00593545	0.00258838	0.00354447	0.000834494	0.00134661		1.73418	0.938591	0.690875	0.651257	1.19742	1.70943	0.397815	0.659668
441	658.539	C41H72O5N	38:6		0.00454392	0.00438449	0.00164587	0.00201431	0.000382783	0.000527969	0.00111324	0.00164268		0.00399981	0.0035617	0.00123309	0.00150539	0.000180536	0.000263778	0.000369442	0.000509862		0.00749882	0.00630221	0.00273066	0.00353305	0.000396417	0.000556433	0.000787746	0.00114608		1.15894	0.881709	1.21404	1.59325	0.542507	1.05858	0.370905	0.553153
442	660.555	C41H74O5N	38:5		0.0654327	0.0682277	0.0619773	0.0559223	0.0307283	0.0231195	0.0324669	0.0323162		0.0586701	0.0560057	0.0464927	0.0424409	0.0095842	0.00701769	0.0111894	0.0110113		0.101484	0.0975712	0.0765255	0.0604841	0.0240062	0.0152316	0.024718	0.0218646		11.6679	5.82463	12.0204	6.17533	12.9066	7.79131	11.6569	10.2573
443	662.57	C41H76O5N	38:4		0.114222	0.103547	0.116948	0.0996984	0.0483273	0.0359714	0.0646632	0.040891		0.103562	0.0860816	0.0877782	0.0750534	0.0153893	0.01129	0.0223059	0.0141884		0.178198	0.147107	0.145732	0.0969325	0.0382649	0.0253616	0.054237	0.0360324		21.5827	9.61379	26.51	1.74929	20.6648	9.26233	25.3404	14.7932
444	664.586	C41H78O5N	38:3		0.0157163	0.00990066	0.0204113	0.00432261	0.022232	0.00914704	0.0114554	0.00846947		0.0141007	0.00779313	0.0153077	0.00499151	0.00804579	0.00375457	0.00377989	0.00264399		0.0268368	0.0155822	0.0285645	0.00527686	0.0204345	0.0096604	0.00913955	0.00507277		4.78701	4.35699	8.66872	7.37302	17.7534	15.5733	6.71269	4.08221
445	684.555	C43H74O5N	40:7		0.00371334	0.00368138	0.00521907	0.0076941	0.000999495	0.00142212	0.000791356	0.00176953		0.00355648	0.00364504	0.00407918	0.00576216	0.000321146	0.000443353	0.000219821	0.000491535		0.00578291	0.00570809	0.00585442	0.00828545	0.000922669	0.00130555	0.000545904	0.00122068		0.743772	0.851151	0.691845	0.948071	0.58149	0.977363	0.268328	0.6
446	686.57	C43H76O5N	40:6		0.00486252	0.00464748	0.00457811	0.00461733	0.00165602	0.00186664	0.00141404	0.00145212		0.00443261	0.00399414	0.00331445	0.00326559	0.000496923	0.000535489	0.00050921	0.00053717		0.00758404	0.00657466	0.00559853	0.00514935	0.00126142	0.00134657	0.00124364	0.00147664		0.917275	0.401498	0.88381	0.652367	0.802099	1.01548	0.500578	0.539817
447	688.586	C43H78O5N	40:5		0.0527248	0.061598	0.0351964	0.0276939	0.012773	0.00977198	0.0210957	0.0148214		0.0469014	0.0504146	0.0263308	0.0209565	0.00440028	0.00363491	0.00760605	0.00626967		0.0816487	0.0876833	0.0442693	0.0252061	0.0110571	0.00931875	0.0190185	0.0150225		9.09321	3.09187	9.49824	4.22088	6.68422	2.41533	12.6273	8.1665
448	Total DAG 18:3 acyl containing				0.479926	0.408918	0.425379	0.346687	0.197442	0.112281	0.211682	0.117804		0.433713	0.333953	0.318921	0.261773	0.0648755	0.0355925	0.0740191	0.0478292		0.761257	0.559915	0.533424	0.334075	0.16257	0.0861418	0.177385	0.094153		100	0	100	0	100	0	100	0
449	556.492	C33H66O5N	30:1		0.00995337	0.00873745	0.00171469	0.0025829	0.00192689	0.00111994	0.00248576	0.00169082		0.00913709	0.00762826	0.00112105	0.00164292	0.00070381	0.000426174	0.000759729	0.000482983		0.0155654	0.0123405	0.00227007	0.00369563	0.0016808	0.000987215	0.0021424	0.00146764		0.744634	0.314898	0.122606	0.220533	0.386753	0.338735	0.466713	0.449583
450	584.524	C35H70O5N	32:1		0.00319491	0.0036626	0.00162277	0.00228968	0.000797861	0.00178407	0.0037188	0.00710812		0.00304122	0.00369582	0.00134762	0.0019836	0.000241776	0.000540628	0.0013636	0.00253089		0.00509771	0.0054223	0.00192797	0.00283073	0.000692691	0.0015489	0.00376789	0.00751467		0.307809	0.287276	0.0896231	0.141808	0.150172	0.335794	0.391987	0.747351
451	586.539	C35H72O5N	32:0		0.013435	0.00636513	0.011081	0.0110381	0.00323801	0.00261411	0.00435852	0.00823431		0.0127501	0.00662296	0.00845392	0.00824153	0.00127391	0.00135298	0.00185039	0.00359156		0.0236901	0.0126996	0.0136353	0.0108672	0.00284178	0.0025999	0.00340965	0.00607812		2.01953	2.23856	0.796363	0.372355	0.806731	1.03369	0.465654	0.88207
452	606.508	C37H68O5N	34:4		0.00823528	0.0105001	0.016692	0.0134555	0.00863751	0.00982964	0.00683487	0.00755765		0.00753055	0.00951554	0.0127383	0.0109273	0.00280389	0.00278985	0.00223246	0.00275581		0.0159303	0.0201617	0.020929	0.0137902	0.0064554	0.00599766	0.00658052	0.00802168		1.73921	2.44251	1.29029	0.376667	1.40577	1.11603	0.934846	0.760756
453	608.524	C37H70O5N	34:3		0.105689	0.0891923	0.0960875	0.0810597	0.051545	0.0210547	0.0502761	0.0308061		0.0962374	0.0742182	0.0725542	0.0618214	0.0174741	0.00569942	0.0179499	0.0128818		0.166435	0.12583	0.120023	0.078727	0.0430856	0.0125369	0.042276	0.0268842		7.72723	1.90457	7.15241	1.42988	8.57525	1.39392	5.72543	3.13034
454	610.539	C37H72O5N	34:2		0.0764235	0.0547563	0.0883052	0.0447133	0.0695146	0.0278104	0.0860189	0.0136913		0.0700703	0.0462665	0.0648993	0.0327656	0.0241153	0.00908284	0.0288998	0.0101754		0.121155	0.0769908	0.116999	0.0349453	0.0594017	0.0220335	0.0762356	0.0119182		5.80423	1.67978	8.77567	3.3206	12.0077	4.0141	13.7556	7.2246
455	612.555	C37H74O5N	34:1		0.00437863	0.00435771	0.00422106	0.00578814	0.00143106	0.00292796	0	0		0.00427435	0.00442916	0.00340919	0.00469247	0.00041612	0.000848166	0	0		0.00704195	0.00703095	0.00488435	0.00671762	0.000884799	0.00174554	0	0		0.359493	0.364346	0.21863	0.313598	0.145893	0.27655	0	0
456	630.508	C39H68O5N	36:6		0.0147128	0.0159622	0.0155177	0.0140981	0.00162873	0.002344	0.00469853	0.00354094		0.0142886	0.0161862	0.0122166	0.0121907	0.000485514	0.000704403	0.00143839	0.001128		0.0241063	0.0270655	0.0195418	0.0163161	0.00125004	0.00194147	0.00474767	0.00394378		1.24331	1.4731	1.06209	0.77095	0.249939	0.415645	1.02304	1.26304
457	632.524	C39H70O5N	36:5		0.0493381	0.0184374	0.0217876	0.0173562	0.00733817	0.00455055	0.0110313	0.00713217		0.0458334	0.0175852	0.0169223	0.0133888	0.00251202	0.00132519	0.00372368	0.00235959		0.0847014	0.0324777	0.0296526	0.0237157	0.00621806	0.00379515	0.00948273	0.0063803		6.47161	6.4052	2.34429	2.30067	1.25756	0.809054	1.46125	1.05206
458	634.539	C39H72O5N	36:4		0.0496464	0.0279651	0.0313392	0.0281678	0.0191536	0.0112225	0.0142977	0.014512		0.0472087	0.0284353	0.0222102	0.0205445	0.00661287	0.00329367	0.00519047	0.00514389		0.0883786	0.055429	0.0421546	0.0308976	0.0158142	0.00677886	0.0133494	0.0148104		7.77732	9.11701	3.62202	2.99364	3.19995	1.38544	1.72499	1.74161
459	636.555	C39H74O5N	36:3		0.180158	0.152571	0.2024	0.154852	0.153762	0.0798623	0.169283	0.0580572		0.163299	0.126045	0.150856	0.114923	0.0524956	0.0231755	0.0562765	0.0234041		0.283335	0.214539	0.256905	0.141869	0.127027	0.0486603	0.144463	0.019883		13.1092	4.09761	16.4369	1.48091	24.8765	5.3435	25.4774	10.7768
460	638.57	C39H76O5N	36:2		0.0215678	0.0164245	0.0235251	0.00563411	0.0312654	0.0190694	0.0330363	0.0106428		0.0199179	0.0147913	0.0172698	0.00429134	0.0107684	0.00569571	0.0107653	0.00387139		0.035021	0.0244885	0.033329	0.00929259	0.0256481	0.0119667	0.0297764	0.0114426		1.93628	1.10815	3.19469	2.73542	4.99617	1.64839	5.55842	4.31178
461	640.586	C39H78O5N	36:1		0.00742503	0.00595629	0.00627882	0.0057075	0.000975665	0.00111165	0.00342859	0.00270078		0.00684372	0.00539297	0.00491381	0.00499912	0.000380637	0.00040828	0.00122292	0.00110047		0.0116538	0.00849772	0.00795526	0.00697921	0.000930702	0.00101461	0.00270035	0.00187502		0.553652	0.290322	0.421953	0.343586	0.239855	0.295124	0.384289	0.28204
462	656.524	C41H70O5N	38:7		0.00815499	0.00489107	0.00819914	0.00864244	0.000696635	0.00100338	0.00205722	0.00460009		0.00761021	0.00462661	0.00602204	0.00618714	0.00022863	0.000319402	0.000894445	0.00200004		0.0133332	0.00680481	0.00992526	0.00900835	0.000624337	0.000886789	0.00152533	0.00341075		0.857305	0.659169	0.496394	0.358717	0.110794	0.178735	0.22031	0.492627
463	658.539	C41H72O5N	38:6		0.00692704	0.00624831	0.014091	0.0106607	0.00292097	0.00193949	0.00564176	0.00535096		0.00637646	0.00566871	0.0103675	0.00757875	0.00117589	0.00100068	0.00179465	0.00187103		0.0107762	0.00896433	0.018114	0.0109121	0.00268496	0.00211468	0.00545154	0.00569681		0.49542	0.295226	1.09822	0.477447	0.638334	0.756896	0.960779	1.03458
464	660.555	C41H74O5N	38:5		0.01444	0.0139507	0.00279628	0.00511683	0.00527284	0.00532732	0.0124487	0.016361		0.0141548	0.0140962	0.00197039	0.00340376	0.00155717	0.00158328	0.00421643	0.00587889		0.0243696	0.0212586	0.00433545	0.00820125	0.00406406	0.00410527	0.0120367	0.0173828		1.78216	1.48863	0.719588	1.52823	0.822634	0.861243	1.43837	1.77204
465	662.57	C41H76O5N	38:4		0.235338	0.233404	0.253365	0.202766	0.112503	0.0631263	0.0935911	0.0566981		0.21104	0.190903	0.189857	0.154623	0.036686	0.0203957	0.0317828	0.0190748		0.367813	0.329959	0.317945	0.200975	0.0928053	0.0499106	0.0811931	0.0565988		16.4434	5.48332	19.1822	3.52727	16.6388	4.95035	11.0841	6.58129
466	664.586	C41H78O5N	38:3		0.368806	0.324513	0.378279	0.291212	0.151762	0.101762	0.231843	0.147056		0.334561	0.269237	0.281705	0.21873	0.0486368	0.0334871	0.0812883	0.0569465		0.576873	0.461544	0.4779	0.287356	0.122803	0.0784618	0.193113	0.120718		25.4187	10.9118	29.2797	4.62653	20.9721	9.70542	26.5234	12.4789
467	684.555	C43H74O5N	40:7		0.0300004	0.0235598	0.0293827	0.0315057	0.00856312	0.00723557	0.0116654	0.0148722		0.0271752	0.0191321	0.0224147	0.0235686	0.00296579	0.00262225	0.00355114	0.00404977		0.04794	0.0317975	0.035438	0.0316671	0.00728041	0.00661284	0.00892013	0.0102541		2.56244	0.742274	1.87902	1.06481	1.2332	0.560993	1.32633	1.54954
468	686.57	C43H76O5N	40:6		0.00781717	0.00852007	0.00744196	0.00610242	0.00261785	0.00215911	0.00219338	0.0025044		0.00698921	0.00696689	0.00583378	0.00565495	0.000990294	0.00083478	0.000791648	0.000913468		0.0122626	0.0120461	0.00993074	0.0077992	0.0023829	0.00211008	0.0020505	0.0027092		0.585344	0.269159	0.621836	0.349358	0.478163	0.401013	0.241774	0.259584
469	688.586	C43H78O5N	40:5		0.0239042	0.0139988	0.0197097	0.022154	0.00472037	0.00436095	0.00772574	0.0116935		0.0219844	0.0118647	0.014643	0.0159705	0.00176433	0.00164211	0.00310653	0.00518847		0.0384612	0.0186087	0.0236171	0.0220523	0.00427005	0.00421383	0.00593899	0.00856757		2.06172	0.30183	1.19555	0.771834	0.80768	0.641757	0.835234	1.24527
470	Total DAG 18:2 acyl containing				1.23955	0.909014	1.23384	0.915793	0.640271	0.330851	0.756635	0.316282		1.13032	0.749992	0.921726	0.691112	0.214289	0.097752	0.259099	0.132145		1.97394	1.23982	1.56741	0.853208	0.528845	0.223758	0.649161	0.258045		100	0	100	0	100	0	100	0
471	556.492	C33H66O5N	30:1		0.0110664	0.00879319	0.0134595	0.00634275	0.0218495	0.0219477	0.00948073	0.00802977		0.0102537	0.00789895	0.00983848	0.00459429	0.00719045	0.00684569	0.00295596	0.00218811		0.0172928	0.0127355	0.0179139	0.00448457	0.0170042	0.0154706	0.00798601	0.00544928		0.634259	0.372554	0.672753	0.187874	0.638949	0.507538	0.382918	0.237617
472	584.524	C35H70O5N	32:1		0.0291448	0.0191401	0.0548318	0.00759026	0.0708934	0.0342453	0.0438068	0.0150239		0.027587	0.0195253	0.0405649	0.00890612	0.0241014	0.0101876	0.0144603	0.00610501		0.0471718	0.0275718	0.0782563	0.0199619	0.0590678	0.0235287	0.0388059	0.013108		1.98087	0.947998	2.96499	0.91083	2.38244	0.567723	1.9482	0.74652
473	586.539	C35H72O5N	32:0		0	0	0	0	0	0	0	0		0	0	0	0	0	0	0	0		0	0	0	0	0	0	0	0		0	0	0	0	0	0	0	0
474	606.508	C37H68O5N	34:4		0.0344943	0.0166643	0.0441439	0.0447329	0.0397178	0.0181356	0.0255707	0.017099		0.0319142	0.0146396	0.035312	0.0394909	0.0135567	0.00454116	0.00875897	0.00584273		0.0565538	0.020425	0.0550323	0.0527167	0.0327322	0.0069891	0.0214152	0.0143492		2.44483	0.620643	1.85269	1.64134	1.3812	0.355849	1.12584	0.780033
475	608.524	C37H70O5N	34:3		0.0988905	0.0875279	0.175186	0.159514	0.115089	0.0720653	0.0872376	0.0824331		0.0898462	0.0729894	0.137842	0.138202	0.0371071	0.0193639	0.0283396	0.0231066		0.154438	0.124369	0.219358	0.179808	0.0917527	0.0408081	0.0705776	0.0588687		5.57704	2.86779	7.44893	5.43037	3.83547	1.71589	3.53807	2.65253
476	610.539	C37H72O5N	34:2		0.110903	0.0683618	0.164965	0.0622699	0.204743	0.0769832	0.170495	0.0334341		0.101921	0.0579248	0.123093	0.0518343	0.0719476	0.0254019	0.0551747	0.0116023		0.178625	0.088839	0.224778	0.0588916	0.173449	0.0479207	0.15074	0.0244283		7.26453	0.85631	8.11467	0.966573	7.06139	0.648051	7.41807	0.603736
477	612.555	C37H74O5N	34:1		0.0710735	0.0219116	0.298343	0.0702007	0.82611	0.250541	0.668284	0.237068		0.0664546	0.0228233	0.217295	0.0515376	0.29343	0.0996905	0.20844	0.0470596		0.123507	0.0464866	0.439065	0.180882	0.71148	0.191287	0.599119	0.249908		6.30723	4.72398	17.1776	8.74254	29.1008	2.68363	28.4164	6.96408
478	630.508	C39H68O5N	36:6		0.0166627	0.0063608	0.0076544	0.00466228	0.0026425	0.00080911	0.0042983	0.00579918		0.0155354	0.0061002	0.00582636	0.00408853	0.000900739	0.000164267	0.00136464	0.00186497		0.028048	0.00937499	0.0100178	0.00500174	0.00227691	0.000656637	0.00373778	0.0051576		1.31159	0.690599	0.353952	0.141644	0.101666	0.0490438	0.181159	0.251969
479	632.524	C39H70O5N	36:5		0.0366591	0.00707228	0.0287982	0.0166093	0.00948632	0.00431483	0.0118012	0.00725018		0.0339993	0.00619916	0.0216065	0.0130627	0.00374771	0.00280105	0.00402842	0.00275007		0.0627748	0.0127082	0.0379198	0.0164257	0.00863615	0.00526311	0.00986212	0.00572657		3.06834	1.7439	1.31868	0.438134	0.348012	0.205723	0.512712	0.325461
480	634.539	C39H72O5N	36:4		0.308655	0.0783589	0.231893	0.0711627	0.230382	0.0313224	0.175383	0.0230773		0.285913	0.0669273	0.173999	0.0698721	0.0826826	0.0245128	0.0579041	0.0152082		0.517153	0.0670153	0.316923	0.0452034	0.202397	0.0412979	0.156443	0.02859		23.772	7.01985	11.801	1.75811	8.61208	2.43193	7.84871	1.97735
481	636.555	C39H74O5N	36:3		0.153447	0.128743	0.172578	0.128735	0.122789	0.0395547	0.12374	0.0548146		0.139678	0.108417	0.12857	0.0964119	0.0423832	0.0109786	0.0416043	0.0194811		0.241147	0.179047	0.219196	0.121902	0.104001	0.0222432	0.105197	0.0390196		8.95114	3.2837	7.59658	3.28387	4.30692	0.577897	5.40733	2.31914
482	638.57	C39H76O5N	36:2		0.104225	0.0141287	0.2757	0.0845192	0.700338	0.215639	0.544848	0.205494		0.0974483	0.0189761	0.201138	0.0653022	0.252928	0.0989809	0.169673	0.0451594		0.179243	0.0311843	0.404792	0.191103	0.606097	0.178888	0.486832	0.202449		8.89233	4.89759	15.6131	8.00741	24.6273	2.8618	23.0622	6.09667
483	640.586	C39H78O5N	36:1		0.0239565	0.00793004	0.0560213	0.0127037	0.297125	0.101917	0.222724	0.0582529		0.0220039	0.00606817	0.0415602	0.0123156	0.108404	0.048799	0.0705885	0.0111632		0.0411721	0.0141222	0.0817667	0.033017	0.26274	0.107722	0.199967	0.0663769		2.02457	1.38842	3.13541	1.41104	10.5021	2.15087	9.63381	1.5824
484	656.524	C41H70O5N	38:7		0.00970858	0.00435849	0.00510257	0.00460975	0.00132528	0.00193071	0.000854129	0.00122111		0.00902331	0.00418463	0.00398269	0.00407044	0.000458534	0.000564178	0.000334583	0.00050721		0.0161228	0.00555878	0.00659241	0.00590997	0.000968741	0.00115552	0.000682722	0.000950709		0.727666	0.304775	0.222585	0.20047	0.0387921	0.0496507	0.040837	0.0599951
485	658.539	C41H72O5N	38:6		0.00592085	0.0054329	0.00727739	0.00562411	0.00483114	0.00750387	0.00207131	0.0021366		0.00570494	0.00547472	0.00543003	0.00421183	0.00143557	0.0021609	0.000679542	0.000727174		0.00950744	0.00877144	0.0093178	0.00650836	0.00329896	0.00443672	0.00190182	0.00209051		0.391294	0.39449	0.314046	0.223246	0.14262	0.19281	0.095278	0.108732
486	660.555	C41H74O5N	38:5		0.0157121	0.0115688	0.013747	0.0137941	0.00670636	0.00951847	0.00673677	0.00526518		0.0144675	0.0102764	0.0105009	0.0108209	0.00241786	0.00352548	0.0023082	0.00175788		0.0247883	0.0164907	0.0166555	0.0152924	0.00610622	0.0090583	0.00532561	0.00357728		0.938767	0.464132	0.548336	0.486833	0.202848	0.253809	0.281328	0.191907
487	662.57	C41H76O5N	38:4		0.161051	0.1403	0.177107	0.141317	0.0725412	0.0534827	0.0869517	0.0654311		0.145978	0.116414	0.133144	0.108893	0.0232249	0.017118	0.0294198	0.0208498		0.252252	0.199194	0.222059	0.1371	0.0579064	0.0388074	0.0691186	0.0435266		9.19785	4.67873	7.7108	3.73497	2.3198	1.29924	3.60169	2.22217
488	664.586	C41H78O5N	38:3		0.249534	0.22584	0.258409	0.196418	0.107462	0.0609429	0.135031	0.0905136		0.226871	0.190687	0.192445	0.146606	0.0344304	0.0185753	0.0461229	0.0296882		0.38817	0.321759	0.327538	0.187331	0.0876778	0.0450067	0.112541	0.0765585		13.8335	7.5556	11.3164	5.12003	3.64908	1.81568	5.90459	4.01577
489	684.555	C43H74O5N	40:7		0.0262303	0.016205	0.025426	0.0234342	0.0167295	0.0165372	0.00799704	0.00609524		0.0238733	0.012881	0.0192985	0.0175053	0.00629125	0.00576729	0.00262012	0.00169521		0.0427024	0.0208748	0.0316729	0.0228795	0.0139644	0.0132058	0.00647733	0.00440949		1.78685	0.297746	1.05421	0.652388	0.509618	0.466054	0.326361	0.193471
490	686.57	C43H76O5N	40:6		0.00966782	0.0136789	0.011313	0.00941637	0.00369901	0.00479834	0.00415783	0.00488733		0.00859012	0.0115951	0.0083034	0.00666002	0.00128417	0.00178253	0.00134597	0.00143485		0.0144597	0.0200145	0.0143924	0.009475	0.00343427	0.00452886	0.00340953	0.003904		0.430238	0.516211	0.485497	0.292207	0.124736	0.131532	0.170815	0.185995
491	688.586	C43H78O5N	40:5		0.00727461	0.0051463	0.00784576	0.00996452	0.00286663	0.0018229	0.00229445	0.0030203		0.00684572	0.00505055	0.00600127	0.00742555	0.000991853	0.000631031	0.000885229	0.00133179		0.0116108	0.00726677	0.00908708	0.0103133	0.00243419	0.0015386	0.00173334	0.00223403		0.465062	0.208857	0.29785	0.306801	0.114269	0.079157	0.10364	0.15446
492	Total DAG 18:1 acyl containing				1.48428	0.817638	2.0298	0.787669	2.85733	0.897207	2.33376	0.640501		1.36391	0.686239	1.51575	0.663379	1.00891	0.32892	0.747009	0.163222		2.40674	1.02647	2.74233	0.573975	2.44742	0.628388	2.05187	0.414121		100	0	100	0	100	0	100	0
493	556.492	C33H66O5N	30:1		0.0358127	0.022706	0.0355399	0.0234739	0.0276398	0.0175292	0.0262809	0.0196342		0.0331331	0.0202227	0.0267986	0.0195207	0.00901038	0.00460476	0.00963205	0.00790663		0.0574646	0.0301802	0.0458024	0.0250917	0.0244201	0.0164861	0.0229991	0.0182933		4.98221	0.817646	4.20843	1.60141	3.82516	2.68495	3.71842	2.83174
494	584.524	C35H70O5N	32:1		0.0423484	0.0258402	0.0416375	0.0251728	0.040915	0.0152856	0.0372953	0.021283		0.0401853	0.0263744	0.0301289	0.0174587	0.0137507	0.00298412	0.0132463	0.00945617		0.0686329	0.0377002	0.0546058	0.0221167	0.0343302	0.00835529	0.0326907	0.0204585		6.12248	2.50519	5.28373	0.879968	5.77344	2.15083	5.61114	2.17022
495	586.539	C35H72O5N	32:0		0.0140682	0.0121342	0.0275961	0.0219625	0.0196749	0.0135347	0.0100619	0.00508294		0.013183	0.011888	0.0199983	0.0153596	0.00656076	0.00503389	0.00344668	0.00189521		0.0221665	0.0177121	0.036018	0.0223038	0.0169355	0.0130354	0.00873004	0.00460336		1.78755	1.07621	3.44122	2.00025	2.38522	1.13089	1.53724	0.688402
496	606.508	C37H68O5N	34:4		0.015117	0.00765483	0.0155747	0.0137278	0.0209157	0.0050114	0.0246585	0.0103157		0.0139086	0.00705415	0.0112589	0.00971467	0.00766735	0.00324637	0.00820053	0.00384802		0.0251129	0.0107182	0.0198079	0.0142879	0.0188957	0.00693536	0.0207438	0.0043739		2.51993	1.3426	1.99148	1.61349	3.01708	1.26137	3.9729	1.03375
497	608.524	C37H70O5N	34:3		0.0180421	0.0188163	0.0266169	0.0283219	0.0114583	0.00963448	0.00942881	0.0105124		0.0163697	0.0160143	0.0196835	0.0206313	0.00370667	0.00326466	0.00323361	0.00351959		0.0276584	0.0271955	0.0319281	0.0284766	0.00944222	0.00831779	0.00703561	0.00716949		1.93677	1.40148	2.61505	1.7195	1.33364	1.02766	1.22737	1.31184
498	610.539	C37H72O5N	34:2		0.171421	0.0825428	0.137024	0.0588456	0.153144	0.0379833	0.122627	0.0329423		0.158936	0.073578	0.100368	0.0431491	0.0535269	0.0121141	0.0416071	0.0181916		0.279375	0.101947	0.183746	0.0499259	0.130439	0.00483745	0.106194	0.0162015		25.712	3.58906	18.309	2.73497	21.3565	5.26128	20.1571	3.88674
499	612.555	C37H74O5N	34:1		0.0583551	0.0301485	0.0709227	0.0364633	0.0543117	0.0298537	0.064162	0.0372035		0.054977	0.0306851	0.051654	0.0254206	0.0189237	0.0108461	0.0230776	0.0166749		0.0951453	0.0402952	0.094323	0.0334254	0.0484589	0.0293131	0.0558335	0.0344134		8.75714	2.06926	9.21294	1.53132	7.12039	2.7639	9.41861	4.18123
500	630.508	C39H68O5N	36:6		0.00180536	0.0017205	0.00276708	0.00226187	0.00326554	0.00355416	0.00230327	0.00275106		0.00172671	0.00175541	0.00197361	0.00149575	0.00102611	0.00104309	0.000840833	0.00098546		0.00292395	0.0025294	0.00375796	0.00331827	0.00270346	0.00304418	0.00220026	0.00290406		0.265488	0.164103	0.351913	0.291093	0.490021	0.560534	0.327829	0.385395
501	632.524	C39H70O5N	36:5		0.00298715	0.002004	0.00359811	0.00555967	0.00218926	0.0020142	0.00107156	0.00169221		0.00278553	0.00198999	0.00270216	0.00395245	0.000700284	0.000646933	0.00044281	0.000730457		0.00487212	0.00282906	0.00412518	0.00562847	0.00198117	0.00181373	0.000886626	0.00129907		0.456641	0.213986	0.336415	0.367571	0.294441	0.294135	0.14231	0.221393
502	634.539	C39H72O5N	36:4		0.0169565	0.0102991	0.0177528	0.0123747	0.00854381	0.00626528	0.00443147	0.00430171		0.0155097	0.00887681	0.0135179	0.00980217	0.00298054	0.00195529	0.00169223	0.00193587		0.027608	0.0134368	0.0229627	0.0120759	0.00772519	0.00558888	0.00364387	0.00329699		2.56793	0.89213	2.18773	0.998268	1.32717	1.08564	0.599032	0.556012
503	636.555	C39H74O5N	36:3		0.0252853	0.0197901	0.0207506	0.0114237	0.0149447	0.00602966	0.0129086	0.00475232		0.0238341	0.0197645	0.0155275	0.00910092	0.00544421	0.00260904	0.00431354	0.00202318		0.0404334	0.0280523	0.0271857	0.0092259	0.0137392	0.00652259	0.0109917	0.00257679		3.47269	1.41458	2.65179	0.334401	2.08441	0.781196	2.14263	0.690482
504	638.57	C39H76O5N	36:2		0.0838025	0.0282663	0.0965797	0.0403459	0.0828025	0.0415693	0.0720422	0.0268883		0.0780888	0.0270734	0.0715905	0.032207	0.0287578	0.0128726	0.0241296	0.00989123		0.140487	0.0360928	0.129273	0.0241672	0.0691509	0.0277204	0.0625797	0.0230432		14.3588	7.43503	13.29	3.30742	10.7436	3.34694	11.2678	2.29974
505	640.586	C39H78O5N	36:1		0.0498358	0.0304325	0.0821743	0.0360499	0.216131	0.10915	0.166051	0.0312444		0.0461385	0.028202	0.0594912	0.024055	0.0795128	0.0470117	0.0543225	0.0129913		0.0802087	0.0420147	0.11094	0.0321208	0.193713	0.112458	0.146615	0.0213604		7.07757	2.59675	11.19	2.59732	28.5133	8.59617	28.7498	10.4502
506	656.524	C41H70O5N	38:7		0.00839569	0.00339688	0.0132742	0.0108492	0	0	0	0		0.00795243	0.00361097	0.0104644	0.00989561	0	0	0	0		0.0146049	0.00598122	0.017431	0.0133476	0	0	0	0		1.68583	1.24045	1.79939	1.38929	0	0	0	0
507	658.539	C41H72O5N	38:6		0.00794246	0.00700394	0.004558	0.0042845	0.00591928	0.00733159	0.00178415	0.00193804		0.0074922	0.00668806	0.00328178	0.00299443	0.00190305	0.00229872	0.000677895	0.00083559		0.0123656	0.0107086	0.00566261	0.00458471	0.00508529	0.0065309	0.00143934	0.00150646		0.91854	0.7999	0.476417	0.287214	0.791444	1.15203	0.234487	0.253569
508	660.555	C41H74O5N	38:5		0.0032698	0.00527302	0.00828511	0.00957046	0.00324812	0.00272096	0.00224532	0.00390628		0.00282663	0.00435063	0.00648808	0.00741531	0.00107014	0.000795872	0.00069296	0.0010952		0.00496233	0.00765433	0.0099094	0.0101393	0.00278433	0.0024459	0.00157167	0.00269487		0.329127	0.39431	0.858654	0.707856	0.4141	0.370848	0.283659	0.489706
509	662.57	C41H76O5N	38:4		0.02709	0.0232599	0.0297524	0.0263864	0.0244781	0.0159583	0.0160229	0.0152787		0.0246632	0.0196542	0.0224193	0.0201701	0.0077919	0.00494545	0.00589005	0.00621015		0.0422972	0.0332799	0.0367761	0.0271042	0.0200326	0.0127677	0.013111	0.0125689		3.24593	1.82794	3.14027	1.72038	3.01656	1.82231	2.10819	2.00882
510	664.586	C41H78O5N	38:3		0.0397972	0.0534474	0.0663716	0.0352662	0.0280062	0.0197314	0.0292065	0.0204766		0.0348294	0.0442876	0.0485324	0.0256506	0.00928185	0.00691948	0.00996241	0.00713732		0.062526	0.0769617	0.087372	0.0304935	0.0236762	0.0179482	0.0255345	0.0207847		4.92102	3.92205	8.50054	1.23485	3.36106	1.77987	4.12611	2.53658
511	684.555	C43H74O5N	40:7		0.0543688	0.0623452	0.0609545	0.0483104	0.0117258	0.0171206	0.00796995	0.0178213		0.0482918	0.0514897	0.0457602	0.0363207	0.00400616	0.00615722	0.00221387	0.00495037		0.0839746	0.089988	0.0769913	0.0440785	0.00962232	0.0154909	0.00549794	0.0122938		6.17137	4.90762	7.08452	2.11037	1.16043	1.63344	0.99915	2.23417
512	686.57	C43H76O5N	40:6		0.0105817	0.0149119	0.0139756	0.0148717	0.0098428	0.0110425	0.0108457	0.0118802		0.00924534	0.0122422	0.0109942	0.0117736	0.00306625	0.0030527	0.00352934	0.00333352		0.0162073	0.0215727	0.0170756	0.0160712	0.00729603	0.00633519	0.00850928	0.00831675		1.1317	1.11507	1.49447	1.25934	1.23722	1.23048	1.42011	1.47511
513	688.586	C43H78O5N	40:5		0.0144686	0.0158426	0.0163894	0.0191093	0.0144291	0.00902605	0.0145711	0.0108375		0.0130223	0.0133286	0.0122589	0.0139496	0.00478065	0.00311609	0.00500699	0.0036195		0.0222173	0.022732	0.0193657	0.0189991	0.0120812	0.00784983	0.0120938	0.00914472		1.57928	1.0729	1.576	1.12887	1.75487	0.730037	1.95608	1.37835
514	Total DAG 18:0 acyl containing				0.701752	0.406791	0.792095	0.450266	0.753585	0.239891	0.635968	0.211486		0.647099	0.352609	0.584893	0.337428	0.263468	0.087347	0.216159	0.0965243		1.13124	0.524251	1.03506	0.367577	0.652512	0.216634	0.548902	0.154911		100	0	100	0	100	0	100	0
515	764.674	C47H90O6N	44:2		0.00192396	0.000842253	0.00225204	0.000506781	0	0	0	0		0.0017723	0.000712933	0.00162258	0.000247747	0	0	0	0		0.00317707	0.000978445	0.00324543	0.00107075	0	0	0	0		0.489198	0.154151	0.279414	0.0309272	0	0	0	0
516	766.69	C47H92O6N	44:1		0.00229232	0.00104988	0.00732137	0.00220238	0	0	0	0		0.00211642	0.000910926	0.00528143	0.00129375	0	0	0	0		0.00377284	0.00124521	0.0107102	0.0046348	0	0	0	0		0.580748	0.195521	0.899448	0.119974	0	0	0	0
517	768.706	C47H94O6N	44:0		0.000222761	0.000338426	0.000143024	0.000275148	2.55022e-05	5.70247e-05	7.85255e-05	0.000132171		0.000222656	0.000338511	0.000101264	0.000196734	1.41679e-05	3.16804e-05	3.13903e-05	5.75583e-05		0.000351528	0.000520525	0.000154198	0.000281484	2.83634e-05	6.34224e-05	5.73184e-05	9.79415e-05		0.0541918	0.0799039	0.0188799	0.0366199	0.00537783	0.0120252	0.0297814	0.0530874
518	776.711	C49H94O5N	e46:3		0.000121365	0.000226748	0	0	0	0	0	0		0.000103979	0.000188497	0	0	0	0	0	0		0.00017882	0.000332043	0	0	0	0	0	0		0.0279069	0.0520094	0	0	0	0	0	0
519	778.726	C49H96O5N	e46:2		0.00342368	0.00128204	0.00281274	0.000852484	0.000521963	0.00066588	4.33122e-05	9.68489e-05		0.00319198	0.001226	0.00203571	0.000548845	0.000224687	0.000282839	1.39717e-05	3.12416e-05		0.00565958	0.00146095	0.00387515	0.000856723	0.000520425	0.000656144	3.86449e-05	8.64127e-05		0.873393	0.235656	0.364462	0.135753	0.0928351	0.108615	0.0111847	0.0250099
520	780.742	C49H98O5N	e46:1		0.00142782	0.000735135	0.00221033	0.000708328	0	0	0	0		0.001339	0.000733067	0.0016124	0.000517288	0	0	0	0		0.00239781	0.00112748	0.00325969	0.00157085	0	0	0	0		0.364194	0.165037	0.272483	0.0530655	0	0	0	0
521	782.758	C49H100O5N	e46:0		3.75594e-05	5.94074e-05	0	0	0.000183757	0.00020511	0	0		3.66167e-05	5.91609e-05	0	0	5.56224e-05	5.91504e-05	0	0		6.01757e-05	9.16312e-05	0	0	0.000150039	0.000178803	0	0		0.00939278	0.0141105	0	0	0.0333053	0.0411023	0	0
522	790.69	C49H92O6N	46:3		0.000743037	0.000493665	0.00130428	0.000315172	0	0	0	0		0.00067633	0.000398184	0.000960792	0.000256501	0	0	0	0		0.00120826	0.000654899	0.00182159	0.000354187	0	0	0	0		0.187098	0.104269	0.169888	0.0601268	0	0	0	0
523	792.706	C49H94O6N	46:2		0.00449385	0.000773077	0.0116371	0.00217924	0	0	0	0		0.00417588	0.000772495	0.00842125	0.00108285	0	0	0	0		0.00762567	0.000643801	0.016871	0.00553149	0	0	0	0		1.1724	0.0844737	1.45101	0.107603	0	0	0	0
524	794.721	C49H96O6N	46:1		0.0928538	0.014737	0.109698	0.0308384	0.174685	0.0302932	0.138864	0.0440137		0.0866178	0.017075	0.0784854	0.0148015	0.0622349	0.0166549	0.0436706	0.0100165		0.157782	0.0137218	0.160186	0.0643371	0.152381	0.0300097	0.127153	0.0539372		24.2354	1.43167	13.4332	1.18056	33.1783	6.98171	46.8414	7.20764
525	796.737	C49H98O6N	46:0		0	0	0	0	0	0	0	0		0	0	0	0	0	0	0	0		0	0	0	0	0	0	0	0		0	0	0	0	0	0	0	0
526	802.726	C51H96O5N	e48:4		8.79934e-05	0.000145801	4.65724e-05	5.55955e-05	0.000206626	0.000183912	5.99736e-05	8.22421e-05		7.65533e-05	0.000120885	3.18233e-05	3.39752e-05	6.56292e-05	4.89158e-05	2.38448e-05	3.31748e-05		0.000130837	0.000212956	6.38432e-05	8.11392e-05	0.000176361	0.00016604	5.33684e-05	7.41296e-05		0.0204081	0.0333533	0.00585811	0.00624206	0.039838	0.0381061	0.0274647	0.0378392
527	804.742	C51H98O5N	e48:3		0.000326263	0.000339201	0.000749552	0.000363958	0.000189477	0.000282284	0	0		0.000302211	0.00032629	0.000570164	0.000296692	6.88466e-05	8.99115e-05	0	0		0.00050828	0.000512317	0.00108228	0.000619902	0.000141892	0.00018319	0	0		0.0794583	0.0789893	0.0995571	0.0585593	0.0324384	0.0455691	0	0
528	806.758	C51H100O5N	e48:2		0.00460034	0.00119151	0.00823521	0.00152866	0.000605746	0.000693028	0	0		0.00428818	0.00118937	0.00598375	0.000944674	0.000274369	0.000360749	0	0		0.00769588	0.00102348	0.0119774	0.00410584	0.000597754	0.000754079	0	0		1.18835	0.186506	1.02933	0.0979042	0.109725	0.136375	0	0
529	808.773	C51H102O5N	e48:1		0.00394045	0.00153967	0.00975834	0.00282547	0.018411	0.00623604	0.00775441	0.0042761		0.0036534	0.0013625	0.00701466	0.00161972	0.00653725	0.00234179	0.00252319	0.0014137		0.00649802	0.00180157	0.0143064	0.00608047	0.0157535	0.0042476	0.00662	0.00340532		1.00682	0.299594	1.19176	0.10286	3.36501	0.510299	2.5054	0.938409
530	810.789	C51H104O5N	e48:0		5.15696e-05	5.29359e-05	5.86121e-05	0.000131061	0	0	0	0		4.79904e-05	4.84332e-05	4.18658e-05	9.36147e-05	0	0	0	0		9.67558e-05	9.85038e-05	6.03901e-05	0.000135036	0	0	0	0		0.014957	0.0156001	0.00779697	0.0174345	0	0	0	0
531	816.706	C51H94O6N	48:4		0.000169553	0.000124413	0.000165133	0.000102984	0	0	0	0		0.000160245	0.000124862	0.000120996	7.99507e-05	0	0	0	0		0.000270648	0.000181309	0.000253674	0.000202873	0	0	0	0		0.0421486	0.0277927	0.0199849	0.0100039	0	0	0	0
532	818.721	C51H96O6N	48:3		0.00259234	0.000808992	0.00698319	0.00184174	0	0	0	0		0.00239231	0.000670841	0.0050284	0.0010868	0	0	0	0		0.00432873	0.000809475	0.0102076	0.00409974	0	0	0	0		0.668607	0.139993	0.85549	0.0629005	0	0	0	0
533	820.737	C51H98O6N	48:2		0.0266319	0.00451256	0.0712909	0.0159317	0.0140101	0.00691726	0.00375572	0.00269904		0.0247447	0.00429843	0.0514281	0.0084956	0.00519851	0.00302371	0.00122545	0.000919941		0.0450768	0.0018558	0.104133	0.0385807	0.0122695	0.00648684	0.00311597	0.00220497		6.94356	0.458768	8.8062	0.165942	2.50367	0.857141	1.16489	0.782173
534	822.752	C51H100O6N	48:1		0.0177496	0.0028331	0.0680132	0.0158539	0.0430643	0.0136047	0.0173312	0.00614622		0.0164512	0.0023554	0.0490615	0.00877201	0.0155269	0.00616538	0.00573253	0.00244071		0.0301751	0.00259575	0.09954	0.0380552	0.0374878	0.0122234	0.0150737	0.00463674		4.63549	0.267491	8.38595	0.161781	7.87947	1.13168	5.87202	1.36562
535	824.768	C51H102O6N	48:0		0	0	0	0	4.94501e-05	0.000110574	2.87007e-05	6.41768e-05		0	0	0	0	1.83149e-05	4.09533e-05	7.97243e-06	1.78269e-05		0	0	0	0	4.66417e-05	0.000104294	1.97987e-05	4.42713e-05		0	0	0	0	0.00742062	0.016593	0.00864294	0.0193262
536	830.758	C53H100O5N	e50:4		0.000177033	0.000145863	0.000207946	0.000266121	2.84891e-05	5.32485e-05	0	0		0.000167531	0.000139941	0.000160145	0.000206603	9.31874e-06	1.54044e-05	0	0		0.000299308	0.000245899	0.00033354	0.00048444	1.91258e-05	3.18395e-05	0	0		0.0469442	0.0399275	0.0256933	0.0286199	0.00469607	0.0083485	0	0
537	832.773	C53H102O5N	e50:3		0.00323239	0.000523278	0.006612	0.00139261	0.000302219	0.000675783	0	0		0.00299698	0.000448574	0.00479573	0.000854359	0.000111933	0.00025029	0	0		0.00548244	0.000292587	0.00957051	0.00327775	0.000285055	0.000637403	0	0		0.843875	0.052098	0.823705	0.0957166	0.0453518	0.10141	0	0
538	834.789	C53H104O5N	e50:2		0.0177896	0.0033129	0.0365102	0.00890012	0.0199782	0.0051193	0.00675407	0.0032877		0.0164881	0.00278297	0.026369	0.00532823	0.00740849	0.00344591	0.00223489	0.00130948		0.0301114	0.00225399	0.0536423	0.0215035	0.0176605	0.00598532	0.00579876	0.0026675		4.63342	0.356158	4.49598	0.195496	3.71322	0.608383	2.21258	0.975372
539	836.804	C53H106O5N	e50:1		0.00552941	0.000993183	0.00996251	0.00192103	0.0146992	0.00479462	0.00521217	0.00188459		0.00511573	0.000762368	0.00718989	0.000765352	0.00518428	0.00172013	0.00170837	0.000777527		0.00937349	0.000846924	0.0144923	0.00483469	0.0126079	0.00341644	0.00458983	0.00174901		1.44593	0.176338	1.24234	0.105698	2.68866	0.404478	1.74299	0.515202
540	838.82	C53H108O5N	e50:0		4.85809e-05	7.7919e-05	4.42803e-05	7.93882e-05	0	0	0	0		4.74159e-05	7.76726e-05	3.51311e-05	6.10127e-05	0	0	0	0		7.76636e-05	0.000119894	7.44322e-05	0.000140409	0	0	0	0		0.0121123	0.0184421	0.00548161	0.00870146	0	0	0	0
541	844.737	C53H98O6N	50:4		0.000830905	0.000115419	0.00169424	0.000420117	0	0	0	0		0.000772302	0.000119712	0.00121755	0.000171246	0	0	0	0		0.00142172	0.000188888	0.0023971	0.000658269	0	0	0	0		0.219143	0.0327345	0.214861	0.0535473	0	0	0	0
542	846.752	C53H100O6N	50:3		0.0155509	0.00173386	0.0386546	0.00824318	0.00801817	0.00491644	0.00235889	0.00173515		0.01443	0.00153466	0.0279628	0.00450699	0.0030622	0.00219156	0.000760846	0.000502948		0.0265379	0.00183584	0.0562486	0.0200735	0.00714038	0.00486396	0.00191403	0.00120071		4.07963	0.196802	4.79867	0.325878	1.41866	0.703131	0.761002	0.462136
543	848.768	C53H102O6N	50:2		0.0677049	0.00708721	0.185238	0.0469982	0.106947	0.0274219	0.0500012	0.00881548		0.0629166	0.0074177	0.133622	0.0282309	0.0385622	0.0140617	0.0162719	0.00390308		0.115525	0.00668829	0.271988	0.1105	0.0939185	0.0284558	0.0446941	0.0102702		17.7616	0.628216	22.7447	1.06109	19.801	2.65498	17.289	1.8948
544	850.784	C53H104O6N	50:1		0.0106464	0.00163991	0.0331959	0.00865022	0.0212378	0.0053047	0.00804979	0.00351316		0.00987016	0.00136509	0.0238088	0.00470398	0.00763655	0.00269706	0.00263087	0.00122879		0.0181819	0.00244912	0.0483398	0.0185327	0.0186884	0.00572841	0.0068106	0.0017158		2.78791	0.265276	4.06117	0.340085	3.93674	0.420096	2.77277	1.08677
545	852.799	C53H106O6N	50:0		0.000285731	0.000126595	0.000848924	0.000272036	0.000520653	0.000311451	0.000131438	0.000193077		0.000267043	0.000127665	0.000616177	0.000173067	0.00017877	9.62496e-05	3.52343e-05	5.2891e-05		0.000474342	0.000174014	0.0012094	0.000435769	0.000441078	0.000252122	0.000111629	0.000153262		0.0735881	0.0283463	0.110891	0.046325	0.0917675	0.0478691	0.0403482	0.0586543
546	856.773	C55H102O5N	e52:5		3.54526e-05	5.7776e-05	5.23921e-05	3.57817e-05	5.41735e-05	5.09014e-05	2.96573e-05	6.63156e-05		3.10215e-05	4.85421e-05	3.83173e-05	2.42376e-05	1.76031e-05	1.72814e-05	1.05919e-05	2.36842e-05		5.24628e-05	8.47611e-05	6.98852e-05	4.55037e-05	4.36618e-05	4.33242e-05	3.1177e-05	6.9714e-05		0.00816632	0.0132617	0.00709074	0.00479601	0.00954258	0.00876372	0.0153954	0.0344251
547	858.789	C55H104O5N	e52:4		0.000745401	0.000346564	0.00120499	0.000347276	0.000347695	0.000294892	0.000241457	0.00028913		0.000693615	0.000339757	0.000873957	0.000226917	0.000120761	0.000107177	8.81743e-05	0.000125645		0.00124105	0.000458597	0.00178098	0.000796999	0.000314472	0.000284941	0.000209418	0.000232378		0.189981	0.0681853	0.148361	0.0189248	0.0619116	0.0441787	0.0905714	0.114572
548	860.804	C55H106O5N	e52:3		0	0	0	0	0	0	0	0		0	0	0	0	0	0	0	0		0	0	0	0	0	0	0	0		0	0	0	0	0	0	0	0
549	862.82	C55H108O5N	e52:2		0	0	0	0	0	0	0	0		0	0	0	0	0	0	0	0		0	0	0	0	0	0	0	0		0	0	0	0	0	0	0	0
550	864.836	C55H110O5N	e52:1		0.00244856	0.000658249	0.00390166	0.000561272	0.00344158	0.00152853	0.00172765	0.000535695		0.00226828	0.00056661	0.00282647	0.000133781	0.00124903	0.000623223	0.000573414	0.000228769		0.00409692	0.000535186	0.00560405	0.00147736	0.003043	0.00149453	0.00153653	0.000485977		0.632232	0.0969654	0.492536	0.0683426	0.623832	0.236689	0.595184	0.135164
551	866.851	C55H112O5N	e52:0		1.07809e-05	2.41069e-05	0	0	2.75874e-05	6.16874e-05	0	0		8.98412e-06	2.00891e-05	0	0	8.35983e-06	1.86932e-05	0	0		1.57964e-05	3.53217e-05	0	0	2.3951e-05	5.35561e-05	0	0		0.00247343	0.00553075	0	0	0.00657985	0.014713	0	0
552	868.737	C55H98O6N	52:6		0	0	0	0	0	0	0	0		0	0	0	0	0	0	0	0		0	0	0	0	0	0	0	0		0	0	0	0	0	0	0	0
553	870.752	C55H100O6N	52:5		0.000162845	0.000190132	9.6258e-05	0.000116258	8.83787e-05	0.000105654	4.86389e-05	0.00010876		0.000156084	0.000191983	7.00287e-05	8.99804e-05	2.93389e-05	3.7311e-05	2.11473e-05	4.72869e-05		0.000256489	0.000282548	0.000155328	0.000209688	7.93699e-05	0.000100373	3.60634e-05	8.06402e-05		0.0395115	0.0431699	0.0108351	0.0124915	0.0151918	0.017999	0.0195381	0.0436885
554	872.768	C55H102O6N	52:4		0.00269185	0.000328677	0.00620102	0.0013623	0.000972223	0.000822595	3.0562e-05	6.83386e-05		0.002511	0.000427169	0.00449573	0.000838989	0.000386536	0.000355598	9.8587e-06	2.20447e-05		0.00460134	0.000492565	0.00904055	0.00335014	0.000954146	0.000815408	2.72687e-05	6.09746e-05		0.705938	0.043681	0.769686	0.0644008	0.184955	0.157722	0.00789219	0.0176475
555	874.784	C55H104O6N	52:3		0.0369326	0.00363534	0.0746509	0.0173827	0.0388381	0.0083587	0.0201134	0.00419991		0.0343039	0.00365979	0.0537889	0.00913045	0.0139182	0.00444529	0.00649778	0.00147529		0.0631932	0.00613062	0.108871	0.0405056	0.0341893	0.00942274	0.0178718	0.0040774		9.69874	0.475718	9.20502	0.29791	7.2633	1.07924	6.90024	0.576701
556	876.799	C55H106O6N	52:2		0.0183127	0.00199346	0.0455714	0.0107578	0.0294754	0.00661894	0.012215	0.00197121		0.0170228	0.00218226	0.0328832	0.00596568	0.0104967	0.00316602	0.0039548	0.000808171		0.0312715	0.00243649	0.0667015	0.0256654	0.0258433	0.00697196	0.0110585	0.00325103		4.80547	0.249232	5.61986	0.168549	5.49073	0.605176	4.24491	0.588979
557	878.815	C55H108O6N	52:1		0.00117087	0.000638982	0.00330617	0.00183549	0.00334776	0.00139617	0.0012099	0.000934499		0.00108871	0.000626268	0.00228553	0.00120035	0.00116541	0.000444997	0.000380246	0.000276824		0.00198284	0.00102498	0.00484787	0.00297302	0.00284993	0.00102853	0.00098602	0.000647419		0.300595	0.147074	0.377484	0.190928	0.604046	0.158606	0.381505	0.287693
558	880.83	C55H110O6N	52:0/e54:7		9.72969e-05	0.000174128	7.95009e-06	1.77769e-05	0.000170224	0.000253355	0	0		9.72969e-05	0.000174128	6.11545e-06	1.36746e-05	8.44747e-05	0.000140691	0	0		0.000151087	0.000265111	1.40041e-05	3.13142e-05	0.000180021	0.000281195	0	0		0.0232256	0.0405582	0.000864963	0.00193412	0.0333131	0.0528912	0	0
559	882.789	C57H104O5N	e54:6		4.43118e-05	7.00474e-05	4.06799e-05	1.44107e-05	0.000398991	0.000440853	0.000102854	7.25639e-05		3.89692e-05	5.91648e-05	2.91179e-05	8.40831e-06	0.000135578	0.000158604	3.04321e-05	2.07242e-05		6.56411e-05	0.000102863	5.61286e-05	1.61206e-05	0.000365696	0.000408894	0.000101711	8.48441e-05		0.0102113	0.0160846	0.00517855	0.00189529	0.0748607	0.0767928	0.0372575	0.0304557
560	884.804	C57H106O5N	e54:5		0.000152519	9.63286e-05	8.41923e-05	6.04886e-05	4.91807e-05	6.82414e-05	0	0		0.000141594	8.78862e-05	5.8674e-05	3.81974e-05	1.99597e-05	2.81851e-05	0	0		0.000274599	0.000218035	0.000123913	0.000101188	4.04903e-05	5.6912e-05	0	0		0.0409545	0.0301079	0.00976667	0.00533073	0.00888729	0.012173	0	0
561	886.82	C57H108O5N	e54:4		0.00147711	0.000367492	0.00223742	0.000643389	0.000157353	0.000170387	5.08011e-05	7.6361e-05		0.00137252	0.000354804	0.00161122	0.00036459	5.59631e-05	6.19602e-05	1.67007e-05	2.32458e-05		0.0024857	0.000329989	0.00330783	0.00143215	0.000147627	0.000159694	3.58956e-05	5.31498e-05		0.382232	0.0489225	0.274512	0.0287208	0.0282289	0.0253998	0.0169566	0.0241259
562	888.836	C57H110O5N	e54:3		0.00260459	0.000360374	0.00401378	0.000600584	0.00133648	0.000475729	0.00019827	9.56434e-05		0.00241017	0.000256905	0.0029126	0.000223641	0.000489967	0.000230843	6.19986e-05	2.20871e-05		0.00447532	0.000765446	0.00577226	0.00156595	0.00116998	0.000449936	0.000186401	0.000124482		0.68981	0.130169	0.509538	0.0904628	0.243579	0.0557649	0.0713185	0.0335262
563	890.851	C57H112O5N	e54:2		0.0012769	0.000366336	0.00215474	0.000878554	0.00314996	0.000695223	0.00157876	0.000726683		0.00118754	0.000366093	0.00154269	0.000558378	0.00110102	0.000246719	0.000505012	0.000236247		0.00215732	0.00045717	0.00312862	0.00155769	0.00274703	0.000676272	0.00135765	0.000559028		0.330609	0.0625987	0.259745	0.0718022	0.599172	0.161104	0.525912	0.215824
564	892.867	C57H114O5N	e54:1		0.00369729	0.00593008	0.00753029	0.00557703	0.0101819	0.00831541	0.00511404	0.0054422		0.00336118	0.00539098	0.00565534	0.00464404	0.00354111	0.00242864	0.00150225	0.00168444		0.00701975	0.0108316	0.0110405	0.00761089	0.00814279	0.00520498	0.00437074	0.00448278		1.09748	1.74914	1.04747	1.01274	1.89253	1.45692	1.45375	1.49619
565	894.752	C57H100O6N	54:7/e54:0		0.000896658	0.00130021	0.000409035	0.000562512	0.000333457	0.000610029	0.000764953	0.0014425		0.000896658	0.00130021	0.000272591	0.00037327	0.000119291	0.000226752	0.000324672	0.00062917		0.00142119	0.0020235	0.000516438	0.000741074	0.000312796	0.000575651	0.000598762	0.00106488		0.219557	0.311385	0.0502624	0.0688258	0.0529326	0.0913447	0.31925	0.577415
566	896.768	C57H102O6N	54:6		2.9558e-05	4.34831e-05	0	0	0.000329395	0.0001469	5.28172e-05	7.08582e-05		2.66529e-05	3.96281e-05	0	0	0.000114489	4.71038e-05	1.41879e-05	1.90663e-05		5.9607e-05	9.45639e-05	0	0	0.000277462	9.7133e-05	4.66988e-05	6.10428e-05		0.00869699	0.0132794	0	0	0.0644908	0.0323165	0.0165666	0.0214525
567	898.784	C57H104O6N	54:5		0.000373149	0.000164599	0.000688933	0.000159539	7.09858e-05	7.33043e-05	1.21501e-05	2.71685e-05		0.000353054	0.000175124	0.000503585	0.00011694	2.68634e-05	2.87808e-05	5.28266e-06	1.18124e-05		0.000633813	0.000241786	0.0010197	0.000404377	6.86474e-05	7.09187e-05	9.00874e-06	2.01442e-05		0.0977079	0.0380579	0.0867935	0.0193343	0.0151801	0.0151895	0.00488067	0.0109135
568	900.799	C57H106O6N	54:4		0.00264399	0.000295034	0.00549575	0.00178951	0.000547201	0.000310001	0.000267749	0.000329391		0.00246131	0.000349994	0.00391064	0.000923112	0.000207009	0.000136761	8.51912e-05	9.51456e-05		0.00450809	0.000278809	0.00809753	0.00357575	0.000476237	0.000280047	0.000204741	0.000218142		0.694546	0.0598854	0.666065	0.102309	0.0977514	0.0454403	0.0915488	0.0984193
569	902.815	C57H108O6N	54:3		0.00759231	0.000818015	0.0147969	0.00415811	0.00649373	0.000992542	0.00208016	0.000461311		0.00708201	0.00111812	0.0106079	0.00228876	0.00236552	0.000854608	0.000679052	0.000197242		0.0129868	0.00132486	0.0217804	0.00916106	0.00576087	0.00153967	0.00182166	0.000244974		1.99576	0.171039	1.80356	0.116311	1.22261	0.110536	0.724295	0.152332
570	904.83	C57H110O6N	54:2		0.00199962	0.000479475	0.00452287	0.00107727	0.00217504	0.00119471	0.000953382	0.000866676		0.00185115	0.00042037	0.00325317	0.000578838	0.000792021	0.000453371	0.00030352	0.000263163		0.00342453	0.000797034	0.00651117	0.00216113	0.00190799	0.00108745	0.000767874	0.000682499		0.525267	0.113419	0.55885	0.0744212	0.390231	0.212059	0.287387	0.239992
571	906.846	C57H112O6N	54:1		6.02521e-05	6.45207e-05	0.000180356	0.000240591	0.000843427	0.0010439	0.000222897	0.000208899		5.66981e-05	6.04812e-05	0.000140212	0.000186906	0.000266717	0.000316884	6.37515e-05	6.14298e-05		0.000106371	0.000111843	0.000292535	0.00042699	0.000772453	0.000957019	0.000196663	0.00018066		0.0165342	0.0180501	0.023003	0.0272114	0.161838	0.207691	0.0647756	0.0605282
572	908.862	C57H114O6N	54:0/e56:7		0.00164002	0.0036672	0.00906736	0.012985	0.00214305	0.004792	0.000667028	0.00149152		0.00149093	0.00333382	0.00616591	0.00857422	0.000621173	0.00138899	0.000166757	0.00037288		0.00352743	0.00788758	0.0143012	0.0199372	0.00195074	0.004362	0.000764389	0.00170923		0.497052	1.11144	1.01624	1.46755	0.440123	0.984145	0.212001	0.474049
573	910.82	C59H108O5N	e56:6		0.00312603	0.0037101	0.00155024	0.00182985	0.00141782	0.00153876	0.00219365	0.00221685		0.00309602	0.0037256	0.00118372	0.00148687	0.000471052	0.000443483	0.000838862	0.000967921		0.00504754	0.00578402	0.00216353	0.00249641	0.00108746	0.000924471	0.00183579	0.00182499		0.785521	0.88969	0.234906	0.314312	0.254011	0.241025	0.91106	0.988529
574	912.836	C59H110O5N	e56:5		5.2623e-05	8.39945e-05	4.41671e-05	6.35864e-05	1.24115e-05	1.76554e-05	0	0		4.67707e-05	7.61111e-05	3.30665e-05	4.82634e-05	4.08787e-06	5.665e-06	0	0		0.000103514	0.000179373	6.57147e-05	0.000105962	1.11396e-05	1.56519e-05	0	0		0.01491	0.0252855	0.00520581	0.00727008	0.00253103	0.00395217	0	0
575	914.851	C59H112O5N	e56:4		0.000401883	0.000212866	0.000393741	0.000321302	0.000136733	0.000134446	6.32031e-05	9.68638e-05		0.000370894	0.000192044	0.000274855	0.000223438	5.31607e-05	5.2864e-05	1.63368e-05	2.44744e-05		0.000725853	0.00044639	0.000628596	0.000541721	0.000124327	0.00013096	6.36267e-05	0.000108948		0.111668	0.0695888	0.0434201	0.0323163	0.0235072	0.019896	0.0197658	0.030656
576	916.867	C59H114O5N	e56:3		0.000306183	0.000165069	0.000549109	0.0003147	0.000211572	8.3831e-05	0.00017511	0.000156569		0.000281313	0.000147037	0.00037998	0.00019038	7.48413e-05	3.19646e-05	6.14308e-05	5.9642e-05		0.000547412	0.0003338	0.000821645	0.000522767	0.000185882	8.2694e-05	0.00016148	0.00016511		0.0845561	0.0534557	0.0634172	0.0308407	0.0385751	0.00976896	0.0754964	0.0846777
577	918.882	C59H116O5N	e56:2		0.000203601	0.000140971	0.000207783	9.0623e-05	0.000363266	0.000358833	0.00032474	0.000270859		0.000190772	0.000142909	0.000147282	6.31519e-05	0.000149619	0.000188996	0.000103979	8.28096e-05		0.000343721	0.00021722	0.000304523	0.000162033	0.000330472	0.000378358	0.000334163	0.000313894		0.0528384	0.0336833	0.0245963	0.00896418	0.0703655	0.0728762	0.12821	0.126652
578	920.898	C59H118O5N	e56:1		0.000101342	0.000130798	2.5579e-05	3.55509e-05	0.000499869	0.000313687	0.000256029	0.000353872		9.23432e-05	0.000118843	2.1224e-05	2.91273e-05	0.000165196	9.66938e-05	7.55344e-05	9.78311e-05		0.000161434	0.000203091	3.98932e-05	5.81228e-05	0.000447042	0.00029757	0.000200219	0.00024664		0.025168	0.0319221	0.00374402	0.00523042	0.0966692	0.0643533	0.0816153	0.105777
579	922.784	C59H104O6N	56:7/e56:0		4.54377e-05	6.01353e-05	3.36917e-05	4.24982e-05	1.37874e-05	3.08296e-05	8.44322e-07	1.88796e-06		4.26015e-05	5.59705e-05	2.52834e-05	2.98607e-05	5.10644e-06	1.14184e-05	3.67096e-07	8.20853e-07		7.67497e-05	0.000106334	5.13381e-05	6.64713e-05	1.30044e-05	2.90787e-05	6.26025e-07	1.39983e-06		0.0122375	0.0172129	0.00437155	0.00516961	0.00206897	0.00462637	0.000339162	0.000758389
580	924.799	C59H106O6N	56:6		9.95708e-05	9.98904e-05	0.00010402	9.83368e-05	9.71889e-05	0.000101718	5.08686e-05	7.06971e-05		9.44819e-05	0.000100218	7.12072e-05	6.77561e-05	3.19238e-05	3.61833e-05	1.88791e-05	2.58555e-05		0.000164212	0.000153597	0.000136182	0.000110244	8.42616e-05	9.64854e-05	4.20678e-05	5.99645e-05		0.0247657	0.0232767	0.0125546	0.0129608	0.0164943	0.0170348	0.0162941	0.0224467
581	926.815	C59H108O6N	56:5		0.000292306	0.000110314	0.000319001	0.000254131	6.34256e-05	8.72426e-05	1.854e-05	4.14566e-05		0.000274664	0.000116996	0.000234807	0.000186866	1.83842e-05	2.52877e-05	6.62141e-06	1.48059e-05		0.000491626	0.000152827	0.000446926	0.000358105	4.86056e-05	7.06402e-05	1.949e-05	4.3581e-05		0.0760609	0.0250483	0.0394272	0.0312266	0.0116148	0.016448	0.00962426	0.0215205
582	928.83	C59H110O6N	56:4		0.000430491	8.27383e-05	0.000817077	0.000285258	1.66198e-05	3.71629e-05	0	0		0.000398154	6.40481e-05	0.000587342	0.000201369	6.15547e-06	1.3764e-05	0	0		0.000741226	0.000179226	0.00120126	0.00058507	1.56759e-05	3.50523e-05	0	0		0.113123	0.0211333	0.0988466	0.021957	0.00249401	0.00557677	0	0
583	930.846	C59H112O6N	56:3		0.00207339	0.000420489	0.00241978	0.000606116	0.00142643	0.000598818	0.000617111	0.000202393		0.0019249	0.000385725	0.00175336	0.0003848	0.000553392	0.000371677	0.00019306	3.55588e-05		0.00356627	0.000892587	0.00347201	0.00116798	0.00133666	0.000744913	0.000577155	0.000288903		0.543735	0.105718	0.301277	0.0565318	0.271425	0.117173	0.211806	0.0560528
584	932.862	C59H114O6N	56:2		0.000183962	0.000131142	0.000940664	0.000522713	0.000635598	0.000199355	0.000581918	0.000470695		0.000167977	0.000111673	0.000657775	0.000337478	0.000232713	0.000104225	0.000175543	0.000127036		0.000313812	0.000223199	0.00140014	0.000893126	0.000558885	0.000200673	0.000490492	0.000367935		0.0473852	0.0332773	0.109922	0.0531974	0.116978	0.0265514	0.182364	0.142361
585	934.877	C59H116O6N	56:1		0.000514786	0.000625499	0.000282759	0.000197151	0.000465865	0.000459953	0.00069193	0.000327238		0.000501001	0.000631352	0.000211199	0.000144218	0.000177162	0.000166843	0.000240066	0.000171422		0.000846895	0.000947383	0.000379739	0.0002474	0.000450583	0.000431349	0.000610514	0.000246821		0.128102	0.144633	0.0380595	0.0265835	0.0854639	0.0820181	0.251737	0.148035
586	936.836	C61H110O5N	e58:7/56:0		0	0	6.59931e-05	9.07219e-05	4.60003e-05	4.46712e-05	1.42607e-05	3.18879e-05		0	0	5.2546e-05	7.48084e-05	1.67769e-05	1.60948e-05	5.09312e-06	1.13886e-05		0	0	9.4763e-05	0.0001299	4.37893e-05	4.18264e-05	1.49915e-05	3.3522e-05		0	0	0.00997361	0.0152408	0.00996027	0.00951279	0.00740287	0.0165533
587	938.851	C61H112O5N	e58:6		8.54996e-06	1.91183e-05	0	0	0	0	0	0		8.54996e-06	1.91183e-05	0	0	0	0	0	0		1.44654e-05	3.23457e-05	0	0	0	0	0	0		0.00226848	0.00507247	0	0	0	0	0	0
588	940.867	C61H114O5N	e58:5		7.32554e-06	1.63804e-05	1.50479e-05	2.11349e-05	2.9014e-05	4.3657e-05	0	0		7.32554e-06	1.63804e-05	1.11646e-05	1.52887e-05	1.11628e-05	1.534e-05	0	0		1.11608e-05	2.49563e-05	2.0979e-05	3.00237e-05	2.74803e-05	3.93949e-05	0	0		0.00170758	0.00381827	0.002222	0.00306339	0.00666068	0.0102949	0	0
589	942.882	C61H116O5N	e58:4		2.37613e-05	3.81705e-05	2.13756e-05	2.03607e-05	8.30985e-06	1.85814e-05	0	0		2.31945e-05	3.80537e-05	1.66323e-05	1.59824e-05	3.07772e-06	6.882e-06	0	0		3.79767e-05	5.87184e-05	3.27257e-05	3.09774e-05	7.83791e-06	1.75261e-05	0	0		0.00592223	0.00903098	0.00290969	0.00312418	0.001247	0.00278837	0	0
590	944.898	C61H118O5N	e58:3		0.000121238	7.10445e-05	0.000125362	8.2194e-05	0.000284879	0.000305787	0.000100374	6.61799e-05		0.00011637	7.42174e-05	9.1009e-05	6.11018e-05	8.73533e-05	8.54102e-05	3.29207e-05	2.39098e-05		0.000203278	0.000109477	0.000182297	0.000142617	0.000209652	0.000176538	9.1062e-05	6.76915e-05		0.0315887	0.0173802	0.0153643	0.00885116	0.0523008	0.0497874	0.0370583	0.0233389
591	946.914	C61H120O5N	e58:2		7.9474e-05	0.000105582	7.25418e-05	6.32384e-05	0.000319366	0.00017826	0.000136412	8.85556e-05		7.59224e-05	0.00010173	5.24013e-05	4.18444e-05	0.000104844	4.41837e-05	4.6437e-05	3.28067e-05		0.000151416	0.000202385	0.000100971	9.1867e-05	0.000272162	0.000153529	0.000130823	9.11999e-05		0.022488	0.0298708	0.00890192	0.00695025	0.0639626	0.0403439	0.050851	0.0347441
592	948.929	C61H122O5N	e58:1/58:8		1.31791e-05	1.84888e-05	1.52291e-05	2.12444e-05	2.75964e-05	6.17074e-05	1.3172e-05	2.94534e-05		1.31791e-05	1.84888e-05	1.13395e-05	1.60799e-05	1.53313e-05	3.42819e-05	4.24902e-06	9.5011e-06		2.13796e-05	3.04636e-05	2.5713e-05	3.73291e-05	3.06925e-05	6.86305e-05	1.17526e-05	2.62796e-05		0.00332101	0.00475153	0.00168074	0.00225499	0.00581945	0.0130127	0.00340147	0.00760592
593	950.815	C61H108O6N	58:7/e58:0		3.65215e-06	8.16645e-06	1.80164e-05	2.83185e-05	6.66488e-05	6.34118e-05	0	0		3.65215e-06	8.16645e-06	1.45687e-05	2.207e-05	2.17214e-05	2.15797e-05	0	0		6.17897e-06	1.38166e-05	2.93677e-05	4.93923e-05	5.53843e-05	5.72986e-05	0	0		0.000968989	0.00216673	0.00240093	0.00336846	0.012274	0.0125828	0	0
594	952.83	C61H110O6N	58:6		3.04609e-05	4.12746e-05	9.25835e-06	2.07023e-05	0	0	1.64917e-05	3.68765e-05		2.95139e-05	4.13938e-05	6.61311e-06	1.47874e-05	0	0	7.1703e-06	1.60333e-05		5.08064e-05	6.24679e-05	9.53921e-06	2.13303e-05	0	0	1.22278e-05	2.73422e-05		0.00777645	0.00959057	0.00123161	0.00275396	0	0	0.00662467	0.0148132
595	954.846	C61H112O6N	58:5		1.38408e-05	3.09491e-05	8.23367e-07	1.84111e-06	4.35377e-05	9.73533e-05	0	0		1.1534e-05	2.57909e-05	5.48911e-07	1.2274e-06	1.26196e-05	2.82184e-05	0	0		2.02798e-05	4.53469e-05	1.31567e-06	2.94193e-06	2.60996e-05	5.83604e-05	0	0		0.00317544	0.00710051	8.23653e-05	0.000184174	0.00684988	0.0153168	0	0
596	956.862	C61H114O6N	58:4		0.000127967	0.000105023	0.000137306	0.000141529	1.87762e-05	4.19848e-05	1.57634e-05	3.5248e-05		0.000120266	0.000101645	9.53932e-05	9.15876e-05	1.04312e-05	2.33249e-05	3.94085e-06	8.81201e-06		0.000229292	0.000206898	0.000204033	0.000222746	2.08827e-05	4.66952e-05	1.80643e-05	4.03929e-05		0.0341199	0.0291459	0.0162625	0.0154931	0.00395946	0.00885363	0.00501007	0.0112029
597	958.877	C61H116O6N	58:3		0.000375777	0.000140234	0.000448071	0.000130607	0.000346876	0.00026429	5.20149e-05	3.63502e-05		0.000344885	0.000120821	0.000327982	9.1469e-05	0.000126489	9.45621e-05	1.75822e-05	1.49197e-05		0.000672149	0.000340775	0.000634676	0.000205847	0.000296985	0.000225116	4.2242e-05	2.55953e-05		0.102268	0.0470217	0.0569132	0.0174082	0.0589082	0.0388796	0.0171632	0.0138411
598	960.893	C61H118O6N	58:2		6.08142e-08	1.35985e-07	6.92159e-05	4.253e-05	0.000377209	0.000359011	0.000174879	0.000146957		5.52856e-08	1.23622e-07	5.45191e-05	3.96938e-05	0.00016323	0.000216734	5.42452e-05	3.97502e-05		1.30802e-07	2.92482e-07	9.94617e-05	6.75327e-05	0.000368557	0.000420062	0.00016705	0.000175697		1.84313e-05	4.12137e-05	0.00984081	0.00835896	0.0785322	0.0778829	0.0604099	0.0470242
599	962.908	C61H120O6N	58:1		5.07498e-05	4.03021e-05	9.97035e-05	5.97256e-05	4.82469e-05	7.02376e-05	0.000598285	0.00032969		4.79318e-05	3.66787e-05	7.49829e-05	5.03737e-05	1.90087e-05	2.60341e-05	0.000181841	9.03813e-05		9.56865e-05	8.89288e-05	0.000149588	8.43457e-05	4.61276e-05	6.45292e-05	0.000546897	0.000296045		0.0142795	0.0123891	0.0135028	0.0110354	0.0110271	0.0164538	0.212625	0.131942
600	964.867	C63H114O5N	e60:7/58:0		0	0	0	0	5.15922e-05	0.000115364	2.35617e-06	5.26855e-06		0	0	0	0	1.5634e-05	3.49587e-05	7.60054e-07	1.69953e-06		0	0	0	0	4.47916e-05	0.000100157	2.10227e-06	4.70083e-06		0	0	0	0	0.0123052	0.0275153	0.000608447	0.00136053
601	966.882	C63H116O5N	e60:6		4.1808e-06	9.34856e-06	8.85389e-06	1.97979e-05	0	0	0	0		3.80073e-06	8.49869e-06	5.53368e-06	1.23737e-05	0	0	0	0		8.99225e-06	2.01073e-05	1.29585e-05	2.89762e-05	0	0	0	0		0.0012671	0.00283333	0.00101021	0.00225891	0	0	0	0
602	968.898	C63H118O5N	e60:5		0	0	2.2972e-05	3.24267e-05	0	0	3.8284e-05	8.56056e-05		0	0	1.90801e-05	2.81012e-05	0	0	9.571e-06	2.14014e-05		0	0	2.72967e-05	4.01016e-05	0	0	4.3872e-05	9.81007e-05		0	0	0.00391451	0.00594251	0	0	0.0121678	0.027208
603	970.914	C63H120O5N	e60:4		2.599e-05	2.69935e-05	0	0	1.29302e-05	2.89127e-05	1.43902e-05	3.21775e-05		2.42081e-05	2.63692e-05	0	0	4.78895e-06	1.07084e-05	4.642e-06	1.03798e-05		4.27136e-05	4.20916e-05	0	0	1.21958e-05	2.72707e-05	1.28396e-05	2.87101e-05		0.00642746	0.006385	0	0	0.00194034	0.00433872	0.00371607	0.00830938
604	972.929	C63H122O5N	e60:3		6.51321e-06	1.4564e-05	1.92507e-05	3.04735e-05	1.10596e-05	2.473e-05	0	0		6.51321e-06	1.4564e-05	1.33774e-05	2.05128e-05	4.09614e-06	9.15925e-06	0	0		1.10195e-05	2.46404e-05	3.1628e-05	4.89898e-05	1.04315e-05	2.33255e-05	0	0		0.00172809	0.00386412	0.00197219	0.00306396	0.00165963	0.00371105	0	0
605	974.945	C63H124O5N	e60:2		0	0	1.57652e-05	2.21542e-05	6.49788e-05	7.29302e-05	4.01731e-05	5.56995e-05		0	0	1.27625e-05	1.89397e-05	2.39361e-05	2.33229e-05	1.6099e-05	2.29047e-05		0	0	2.23759e-05	3.0784e-05	6.06931e-05	6.39634e-05	3.52432e-05	4.83625e-05		0	0	0.00246532	0.00395903	0.0135907	0.0171056	0.0182056	0.0249294
606	976.83	C63H110O6N	60:8/e60:1		0.000528392	0.00036015	0.000563193	0.000650203	0.000238238	0.000118914	0.000486726	0.000456907		0.000495428	0.000343663	0.000380992	0.000403329	8.32106e-05	3.56348e-05	0.000182927	0.000189391		0.00083739	0.000525401	0.000761686	0.000925646	0.000211563	0.00011513	0.000440002	0.000428049		0.130571	0.0810826	0.0693837	0.0744979	0.0451842	0.024977	0.207783	0.229931
607	978.846	C63H112O6N	60:7/e60:0		0	0	5.18165e-06	1.15865e-05	1.61465e-05	3.61047e-05	0	0		0	0	3.98588e-06	8.91271e-06	5.9802e-06	1.33721e-05	0	0		0	0	9.1275e-06	2.04097e-05	1.52295e-05	3.40543e-05	0	0		0	0	0.00056376	0.0012606	0.00242299	0.00541798	0	0
608	980.862	C63H114O6N	60:6		0	0	0	0	0	0	0	0		0	0	0	0	0	0	0	0		0	0	0	0	0	0	0	0		0	0	0	0	0	0	0	0
609	982.877	C63H116O6N	60:5		2.10814e-05	2.17123e-05	8.40732e-06	1.87993e-05	0	0	0	0		1.88744e-05	1.86363e-05	7.64302e-06	1.70903e-05	0	0	0	0		3.48879e-05	3.4095e-05	1.08864e-05	2.43428e-05	0	0	0	0		0.00525222	0.00519236	0.00164479	0.00367786	0	0	0	0
610	984.893	C63H118O6N	60:4		5.11931e-06	1.14471e-05	0	0	0.000124714	0.000199311	0	0		5.11931e-06	1.14471e-05	0	0	4.35102e-05	7.33594e-05	0	0		7.7995e-06	1.74402e-05	0	0	0.000116535	0.000187721	0	0		0.00119331	0.00266832	0	0	0.0205562	0.0306649	0	0
611	986.908	C63H120O6N	60:3		2.50731e-05	3.54911e-05	1.93351e-05	3.70384e-05	3.36936e-05	6.00338e-05	8.18529e-05	7.91162e-05		2.37022e-05	3.31138e-05	1.24221e-05	2.30743e-05	1.02479e-05	1.73965e-05	2.30881e-05	2.23064e-05		4.41755e-05	6.32024e-05	2.89963e-05	5.40519e-05	2.22547e-05	3.61201e-05	7.76964e-05	8.39421e-05		0.00709391	0.0102168	0.00219369	0.0042293	0.0052576	0.00944916	0.0239781	0.0236185
612	988.924	C63H122O6N	60:2		0.000203602	0.000177269	8.47753e-05	1.94743e-05	0.000150843	0.000161762	0.000115599	9.5182e-05		0.000186497	0.000161238	6.3501e-05	2.23565e-05	4.76606e-05	4.80426e-05	3.60429e-05	2.67997e-05		0.000331038	0.000261882	0.000118131	2.13678e-05	0.000135425	0.000140419	9.83578e-05	7.06837e-05		0.0502634	0.0402161	0.0115618	0.00596403	0.0321008	0.0386735	0.0406536	0.0277776
613	990.94	C63H124O6N	60:1		0.000143776	0.000113698	0.000222508	0.000279267	0.00013865	0.000139079	0.000125578	0.000146157		0.000132014	9.7749e-05	0.000150179	0.000169017	5.60995e-05	6.26687e-05	4.74768e-05	6.34347e-05		0.000226902	0.00016818	0.000315668	0.000411799	0.000137475	0.000141024	9.71335e-05	0.000111138		0.0355976	0.0262718	0.0272438	0.0311722	0.0279658	0.0292636	0.0434546	0.0582207
614	Total TAG 16:1 acyl containing				0.382234	0.0491347	0.811619	0.190384	0.536478	0.108134	0.295106	0.0756105		0.355534	0.0529296	0.584572	0.0996126	0.192536	0.0611833	0.0945707	0.0225302		0.650678	0.0359249	1.18711	0.45003	0.468842	0.109879	0.264447	0.0825769		100	0	100	0	100	0	100	0
615	764.674	C47H90O6N	44:2		0.000428009	0.000341479	0.000293139	0.000343167	0	0	0	0		0.000403361	0.000327627	0.000213525	0.000244411	0	0	0	0		0.000671885	0.000516007	0.000368162	0.000355511	0	0	0	0		0.0493399	0.0386041	0.0162318	0.019044	0	0	0	0
616	766.69	C47H92O6N	44:1		0.00777101	0.00279064	0.00814413	0.00139022	0.00174167	0.00170942	0.000762745	0.00109755		0.00722021	0.00255967	0.00591694	0.000761641	0.000754524	0.000857479	0.000239265	0.000348364		0.0128992	0.00305797	0.0115204	0.00234009	0.00172396	0.001815	0.000630354	0.000968394		0.894002	0.283486	0.43669	0.10198	0.0640961	0.0623752	0.0516566	0.0726429
617	768.706	C47H94O6N	44:0		0.00422736	0.00137164	0.0167557	0.0039751	0.00511657	0.00438628	0.000386224	0.00053088		0.00395643	0.00142342	0.0120046	0.00152617	0.00200934	0.00183835	0.000147725	0.000209845		0.007037	0.00145764	0.0241567	0.0080677	0.00463816	0.00430942	0.000313511	0.00042951		0.493522	0.163333	0.869887	0.082786	0.162285	0.131396	0.0306438	0.0435907
618	776.711	C49H94O5N	e46:3		0.00038914	0.000340212	0.00091781	0.000206625	0.00151636	0.000878862	0.000228732	0.000493395		0.000349093	0.000298243	0.000661684	8.93402e-05	0.000472911	0.000274112	6.33552e-05	0.000137145		0.000662473	0.000569482	0.00130552	0.000378644	0.00123652	0.000707209	0.000160768	0.000338942		0.047383	0.0459735	0.0488806	0.0115315	0.0525533	0.0350629	0.0154996	0.0331784
619	778.726	C49H96O5N	e46:2		0.00027321	0.000452563	0	0	0	0	0	0		0.000238438	0.000379373	0	0	0	0	0	0		0.000404078	0.00066367	0	0	0	0	0	0		0.0288861	0.0461015	0	0	0	0	0	0
620	780.742	C49H98O5N	e46:1		0.0136366	0.00464551	0.00816487	0.00184046	0.00986741	0.00348178	0.00795392	0.0023679		0.0126286	0.00401842	0.00586742	0.00070203	0.00375865	0.00231088	0.00255376	0.000712324		0.0227762	0.00525554	0.0115988	0.00319279	0.00877471	0.00408364	0.00711066	0.00219916		1.5609	0.432968	0.430441	0.0808009	0.362846	0.17798	0.65017	0.126365
621	782.758	C49H100O5N	e46:0		0.00183316	0.000865805	0.00488683	0.00141627	0.0119256	0.0041823	0.00274082	0.00205318		0.00169	0.000766051	0.00349979	0.00074515	0.00427412	0.00168476	0.000916545	0.000723115		0.00301561	0.00104595	0.00714634	0.00296345	0.0102413	0.00303843	0.00222285	0.00161402		0.211335	0.0908531	0.249959	0.00968235	0.402605	0.0675115	0.205398	0.144737
622	790.69	C49H92O6N	46:3		1.35789e-05	1.20757e-05	3.25868e-05	2.45229e-05	4.98938e-05	4.60136e-05	7.95294e-05	7.87745e-05		1.29231e-05	1.17926e-05	2.48585e-05	1.9139e-05	1.56516e-05	1.43399e-05	2.71265e-05	2.50622e-05		2.50724e-05	2.21281e-05	4.36955e-05	3.24923e-05	4.01616e-05	3.74016e-05	6.39759e-05	6.11976e-05		0.00163194	0.00144925	0.00191174	0.00168245	0.00148415	0.00138387	0.00701553	0.0065648
623	792.706	C49H94O6N	46:2		0.00103525	0.000550967	0.00283868	0.000669936	3.17637e-05	7.10257e-05	0	0		0.000970384	0.000532712	0.00204222	0.000328888	1.17643e-05	2.63058e-05	0	0		0.00170268	0.000785634	0.00411738	0.00147213	2.99597e-05	6.6992e-05	0	0		0.117628	0.0622313	0.147147	0.00978256	0.00086993	0.00194522	0	0
624	794.721	C49H96O6N	46:1		0.0143266	0.00322872	0.0383352	0.0107867	0.016562	0.00491771	0.00748627	0.00461783		0.0132789	0.00276281	0.0274596	0.00568197	0.00595792	0.00225121	0.00244451	0.00152469		0.024148	0.00259922	0.0561693	0.0231194	0.0143931	0.00433156	0.0061777	0.00326427		1.66153	0.323197	1.96237	0.0804978	0.563662	0.0614567	0.569798	0.288929
625	796.737	C49H98O6N	46:0		0.101219	0.0153986	0.14304	0.0448364	0.224	0.0437766	0.164252	0.0476033		0.0944128	0.0179861	0.102109	0.0225483	0.0803053	0.0247831	0.0520908	0.0119797		0.173188	0.0271225	0.208908	0.0892894	0.195919	0.0461148	0.148075	0.052088		11.7278	1.62492	7.29821	0.460836	7.88642	1.69426	13.2925	1.71638
626	802.726	C51H96O5N	e48:4		2.54829e-05	3.55448e-05	3.17976e-05	4.45135e-05	3.78599e-05	8.46574e-05	0	0		2.44987e-05	3.4609e-05	2.15267e-05	3.07359e-05	1.40222e-05	3.13546e-05	0	0		4.43738e-05	6.14581e-05	3.85162e-05	5.27443e-05	3.57098e-05	7.98495e-05	0	0		0.00331538	0.00455469	0.00166082	0.0023868	0.00103689	0.00231856	0	0
627	804.742	C51H98O5N	e48:3		0.000112653	0.000173554	5.42797e-05	6.96947e-05	7.5978e-05	4.50552e-05	5.95563e-06	1.0678e-05		9.76147e-05	0.000142936	4.14787e-05	5.36625e-05	3.00374e-05	2.35411e-05	2.47405e-06	4.66075e-06		0.000171024	0.000251721	8.80266e-05	0.000123809	6.90807e-05	4.91171e-05	4.57086e-06	7.91004e-06		0.0122131	0.017262	0.00298565	0.00348605	0.00281449	0.00192727	0.000514378	0.000970285
628	806.758	C51H100O5N	e48:2		0.00106796	0.000356277	0.0024081	0.000633537	0.00130569	0.00188475	5.27933e-05	9.33193e-05		0.000983473	0.000280274	0.00172291	0.000258595	0.000430194	0.000540335	1.65953e-05	3.01435e-05		0.00177958	0.000390494	0.00351158	0.00132541	0.000940349	0.00114274	4.514e-05	8.34912e-05		0.124851	0.0397025	0.124634	0.0132944	0.0380604	0.0526971	0.00352148	0.00621087
629	808.773	C51H102O5N	e48:1		0.0169617	0.00358979	0.0309313	0.00834929	0.0329995	0.0067678	0.0145262	0.00492466		0.0157831	0.00352513	0.0221022	0.00391495	0.0119109	0.00407018	0.00467334	0.00160643		0.0286305	0.00313705	0.0450204	0.0172521	0.0287824	0.00647138	0.01288	0.00458021		1.97153	0.397068	1.58736	0.107166	1.14591	0.136611	1.15954	0.16833
630	810.789	C51H104O5N	e48:0		0.00988551	0.00283236	0.0243358	0.00657299	0.142011	0.0376688	0.0495573	0.0115081		0.0091752	0.00255002	0.0174526	0.00334421	0.0505741	0.0164268	0.0162103	0.00486557		0.0164856	0.00252128	0.0355407	0.0141215	0.123105	0.0317788	0.0436354	0.00875353		1.15141	0.308465	1.25031	0.0281498	4.86182	0.379786	4.04813	0.381115
631	816.706	C51H94O6N	48:4		2.65604e-05	3.68302e-05	0	0	1.2678e-05	2.0146e-05	0	0		2.65604e-05	3.68302e-05	0	0	4.71244e-06	6.63832e-06	0	0		4.24249e-05	5.83418e-05	0	0	1.18481e-05	1.78265e-05	0	0		0.00318875	0.00442071	0	0	0.000598557	0.000986161	0	0
632	818.721	C51H96O6N	48:3		0.000272806	0.000279519	0.000767035	0.000313447	0.000165025	0.000105049	4.91241e-05	7.93265e-05		0.000248548	0.000237479	0.000549749	0.000205508	6.02085e-05	3.67601e-05	1.7268e-05	2.61001e-05		0.000422198	0.000412872	0.0011534	0.00062656	0.000144469	9.57858e-05	4.19202e-05	7.04786e-05		0.0303735	0.0284717	0.0392211	0.0119638	0.00626884	0.00511896	0.003573	0.00539032
633	820.737	C51H98O6N	48:2		0.00600481	0.00119377	0.0205464	0.00589749	0.00550835	0.00280792	0.00151171	0.00198264		0.00559431	0.00123105	0.0147302	0.00321949	0.00201177	0.00114882	0.000487227	0.000635989		0.0101227	0.000952534	0.0301069	0.0125895	0.00482508	0.00266125	0.00140173	0.00180018		0.707821	0.180569	1.05117	0.0531904	0.18236	0.0585918	0.110932	0.131824
634	822.752	C51H100O6N	48:1		0.0575382	0.0104149	0.179076	0.0474122	0.155162	0.0425101	0.0713739	0.0165677		0.0532571	0.0080402	0.128593	0.0243423	0.0552865	0.0183587	0.022903	0.00496936		0.0975635	0.00825774	0.261779	0.10384	0.134827	0.037277	0.0636024	0.0171644		6.68744	1.10252	9.21777	0.193791	5.27924	0.245503	5.80416	0.218327
635	824.768	C51H102O6N	48:0		0.0646917	0.0785004	0.139417	0.0381785	0.225511	0.0595521	0.0853398	0.0242906		0.0593666	0.0710478	0.0998391	0.0181348	0.0802529	0.0258876	0.0275885	0.00802477		0.126201	0.175887	0.203887	0.081311	0.195822	0.0519918	0.0745544	0.0159366		6.96544	7.67329	7.16645	0.233862	7.70463	0.386682	6.88942	0.644003
636	830.758	C53H100O5N	e50:4		1.81298e-05	4.05395e-05	0	0	8.97137e-05	8.54153e-05	0	0		1.81298e-05	4.05395e-05	0	0	3.52681e-05	3.28427e-05	0	0		2.76216e-05	6.17637e-05	0	0	8.59693e-05	7.95191e-05	0	0		0.00217441	0.00486213	0	0	0.00363688	0.0038929	0	0
637	832.773	C53H102O5N	e50:3		0.000466523	0.000169872	0.000958367	0.000424796	0.000558504	0.000549691	0.000124083	8.90701e-05		0.000434214	0.000160667	0.000683136	0.000243694	0.000199684	0.00019678	4.11362e-05	3.10622e-05		0.00079191	0.00027755	0.00143706	0.000752727	0.000476797	0.000501954	0.000104286	6.1786e-05		0.0527469	0.0168025	0.0491536	0.0167546	0.0176799	0.0141856	0.0105838	0.0066942
638	834.789	C53H104O5N	e50:2		0.00963654	0.00177889	0.0218663	0.00638758	0.0165855	0.00313645	0.00794386	0.00213774		0.00894479	0.00161242	0.0157249	0.00362713	0.00595562	0.00188265	0.00256451	0.000727238		0.0163214	0.00145268	0.0320828	0.0137429	0.0145892	0.00372192	0.00704434	0.00198283		1.12276	0.208146	1.12189	0.0764547	0.576727	0.0585988	0.64192	0.0417539
639	836.804	C53H106O5N	e50:1		0.0526078	0.00916009	0.113668	0.0255217	0.239059	0.054405	0.0999512	0.0211179		0.0486673	0.00671674	0.0818349	0.0110745	0.0849963	0.0249339	0.0322864	0.00727514		0.0894772	0.0097181	0.165771	0.0597344	0.207936	0.0482926	0.0886681	0.0193034		6.09904	0.862761	5.9166	0.383284	8.21233	0.18459	8.16903	0.225771
640	838.82	C53H108O5N	e50:0		0.0156183	0.00418048	0.0345088	0.00911234	0.141698	0.033315	0.0545558	0.0110686		0.014436	0.00335899	0.0247118	0.00424643	0.0501715	0.0142588	0.0178152	0.0050061		0.0262115	0.00372064	0.0499631	0.018474	0.12302	0.0288716	0.0481062	0.00855501		1.81035	0.411406	1.77805	0.119831	4.86884	0.23722	4.47313	0.400026
641	844.737	C53H98O6N	50:4		3.09015e-05	2.21117e-05	6.12551e-05	4.45509e-05	0.000108853	9.46779e-05	3.22067e-05	4.41173e-05		2.7739e-05	1.86086e-05	4.16439e-05	2.86666e-05	3.93805e-05	3.43391e-05	9.24515e-06	1.28868e-05		5.27832e-05	3.30331e-05	8.60891e-05	6.06888e-05	9.64603e-05	9.01659e-05	3.27357e-05	4.52247e-05		0.00351504	0.00233115	0.00296989	0.00227155	0.00376857	0.00295668	0.00238877	0.00328999
642	846.752	C53H100O6N	50:3		0.00165126	0.000210485	0.00477648	0.00137926	0.00235466	0.00104732	0.000329564	0.000460569		0.00154217	0.00027766	0.00341821	0.000744323	0.000873114	0.000483143	0.000126576	0.000199368		0.00281456	0.000235058	0.00702003	0.00296057	0.0020766	0.00103627	0.000243056	0.000338226		0.194746	0.0432687	0.244019	0.0173212	0.0789981	0.0235955	0.0271956	0.0415467
643	848.768	C53H102O6N	50:2		0.0387525	0.00727163	0.114423	0.0337156	0.0992087	0.026139	0.0452122	0.013738		0.0358856	0.0059503	0.0820304	0.0185776	0.0352076	0.0110226	0.0144744	0.00416482		0.0657866	0.00750378	0.167751	0.0713418	0.0864693	0.0243806	0.0399224	0.0122176		4.52577	0.918103	5.84788	0.31497	3.38188	0.120532	3.61885	0.374897
644	850.784	C53H104O6N	50:1		0.117634	0.0134335	0.369467	0.0990777	0.540702	0.140566	0.226515	0.0486268		0.10921	0.0125309	0.265102	0.0504113	0.191451	0.0576147	0.072551	0.0134325		0.201008	0.0184819	0.540532	0.216029	0.471082	0.130112	0.202803	0.0564573		13.7099	1.86784	18.997	0.265341	18.4434	0.848456	18.5081	1.18605
645	852.799	C53H106O6N	50:0		0.0448934	0.0462491	0.0911991	0.0254731	0.152845	0.0452832	0.050361	0.0114611		0.0411841	0.0417706	0.0653657	0.0127958	0.0540769	0.0177693	0.0164804	0.0049326		0.0859814	0.10515	0.133505	0.0544097	0.13275	0.0402576	0.0443898	0.00894321		4.89064	4.45932	4.68173	0.0883035	5.17649	0.322513	4.11777	0.390894
646	856.773	C55H102O5N	e52:5		0.000165698	9.48126e-05	0.000218313	7.9753e-05	0.000387437	0.000165801	9.08231e-05	9.00295e-05		0.000155491	9.215e-05	0.000163357	7.853e-05	0.000137478	6.5247e-05	2.77507e-05	2.61409e-05		0.000270228	0.000131771	0.000307166	0.000114658	0.00034548	0.000170676	8.28636e-05	9.75516e-05		0.0188713	0.010798	0.0125794	0.00831878	0.0135007	0.00496811	0.00727403	0.00733887
647	858.789	C55H104O5N	e52:4		5.18295e-05	7.10066e-05	1.80853e-05	3.96745e-05	0.000485477	0.000495696	0.000199771	0.000142406		4.74036e-05	6.51477e-05	1.29717e-05	2.83109e-05	0.000179242	0.000178816	6.16233e-05	3.93571e-05		7.74155e-05	0.000106008	1.87068e-05	4.084e-05	0.000456697	0.000458771	0.000169052	9.93807e-05		0.00572216	0.00785846	0.00101906	0.0022143	0.017563	0.0163245	0.0151553	0.00810823
648	860.804	C55H106O5N	e52:3		3.55271e-16	7.94411e-16	0	0	0	0	0	0		3.55271e-16	7.94411e-16	0	0	0	0	0	0		5.41272e-16	1.21032e-15	0	0	0	0	0	0		4.26097e-14	9.52782e-14	0	0	0	0	0	0
649	862.82	C55H108O5N	e52:2		0	0	0	0	0	0	0	0		0	0	0	0	0	0	0	0		0	0	0	0	0	0	0	0		0	0	0	0	0	0	0	0
650	864.836	C55H110O5N	e52:1		0.0321646	0.00370022	0.0609489	0.0170529	0.142551	0.0351567	0.0560018	0.0115618		0.0298193	0.00290622	0.0436098	0.00835816	0.0504886	0.0147356	0.0180699	0.00398111		0.0549799	0.0052002	0.0891704	0.0360557	0.123987	0.0315097	0.0497982	0.0116082		3.75146	0.537289	3.124	0.0891801	4.87627	0.108354	4.57794	0.144904
651	866.851	C55H112O5N	e52:0		0.00406899	0.0011737	0.00639154	0.00178374	0.0283815	0.00793041	0.0101677	0.00235723		0.00378625	0.00113281	0.00457392	0.000906254	0.0100173	0.00302343	0.00332563	0.000902441		0.00680522	0.00110141	0.00914202	0.00312134	0.0245213	0.00629517	0.00888057	0.000952643		0.471542	0.126743	0.330171	0.0535566	0.965008	0.0461511	0.842037	0.159041
652	868.737	C55H98O6N	52:6		7.6065e-05	0.000127084	9.34557e-05	0.000139637	0.000210637	0.000421894	4.62425e-05	8.40368e-05		6.62072e-05	0.000106252	6.28698e-05	9.02347e-05	6.22246e-05	0.000121815	1.21115e-05	2.09275e-05		0.000115418	0.000186527	0.000145994	0.000210367	0.000192023	0.000383942	5.11736e-05	9.67024e-05		0.00804558	0.012902	0.00447683	0.00661971	0.00702094	0.0141042	0.00370231	0.00691325
653	870.752	C55H100O6N	52:5		6.96718e-05	3.28867e-05	3.46334e-05	4.23185e-05	0	0	0	0		6.31289e-05	2.63934e-05	2.61248e-05	3.09974e-05	0	0	0	0		0.000121956	6.03619e-05	4.08827e-05	4.35052e-05	0	0	0	0		0.00795042	0.00334098	0.00209222	0.00253185	0	0	0	0
654	872.768	C55H102O6N	52:4		0.00017851	0.000213963	0.000214645	0.000268487	0	0	0	0		0.000156691	0.000179704	0.00016125	0.000198357	0	0	0	0		0.000282097	0.000327054	0.000299644	0.000402073	0	0	0	0		0.0208658	0.0234653	0.0116745	0.0139176	0	0	0	0
655	874.784	C55H104O6N	52:3		0.00552897	0.00106394	0.0127024	0.0037512	0.00935304	0.00472629	0.000180858	0.000323659		0.0051445	0.00108845	0.00906934	0.00193179	0.00337827	0.0017653	6.18745e-05	0.000104386		0.0094306	0.00157232	0.018434	0.00733895	0.00806415	0.00387704	0.000156621	0.000289406		0.642211	0.121203	0.648548	0.0594484	0.303337	0.122207	0.0127918	0.0215404
656	876.799	C55H106O6N	52:2		0.111346	0.0108616	0.239734	0.0627346	0.322459	0.0804149	0.125227	0.0292307		0.103289	0.00899786	0.172008	0.0310284	0.114313	0.0336492	0.040268	0.00923918		0.190426	0.0161089	0.3503	0.137206	0.28151	0.0763985	0.111298	0.0286875		13.0238	2.04578	12.3424	0.11907	11.0359	0.943776	10.1782	0.286341
657	878.815	C55H108O6N	52:1		0.0385639	0.00483832	0.105315	0.0277618	0.162191	0.0425259	0.0497212	0.01223		0.0357887	0.00438934	0.0757062	0.0143454	0.0573907	0.0170157	0.0160551	0.00404429		0.0658699	0.0064721	0.154401	0.06201	0.14143	0.0395785	0.0438655	0.00967861		4.50097	0.702716	5.42992	0.190645	5.53412	0.473382	4.03959	0.170509
658	880.83	C55H110O6N	52:0/e54:7		0.00970131	0.00887225	0.0112541	0.00343206	0.021901	0.0096665	0.00775217	0.00301404		0.00889868	0.00798837	0.0080542	0.00186834	0.00776084	0.00344853	0.00253754	0.00111049		0.0182751	0.020334	0.0166192	0.00731171	0.0187723	0.00770589	0.00674114	0.00239086		1.05616	0.845126	0.574189	0.0462931	0.720197	0.16708	0.615667	0.140833
659	882.789	C57H104O5N	e54:6		0.000273227	0.000191007	0.000678374	0.000262033	0.00192305	0.000758755	0.000579505	0.000126842		0.000262062	0.000197451	0.000493297	0.000175596	0.00067839	0.000263941	0.000192018	6.74501e-05		0.000443128	0.000292846	0.00101672	0.000499857	0.00161515	0.000324939	0.000532552	0.00019974		0.0325545	0.0230938	0.035629	0.0126958	0.0675913	0.0225676	0.0514258	0.023679
660	884.804	C57H106O5N	e54:5		8.0523e-05	7.67699e-05	6.48953e-05	5.00705e-05	0.00216214	0.000429453	0.000383451	0.000445304		7.33915e-05	6.9911e-05	4.72407e-05	3.42441e-05	0.000761982	0.000177677	0.000127375	0.000144821		0.000133272	0.000121896	9.14444e-05	7.09587e-05	0.00188776	0.000422034	0.000285766	0.000301667		0.00868622	0.00839307	0.00331512	0.00239628	0.0751951	0.00990149	0.0291061	0.0325849
661	886.82	C57H108O5N	e54:4		0.000583369	7.8226e-05	0.00065212	0.000587028	0.00110357	0.000622416	0.000278201	0.00025142		0.000543918	9.42748e-05	0.000473399	0.00040508	0.000425466	0.000300686	0.000101004	9.12052e-05		0.000993946	8.56239e-05	0.00101408	0.00102109	0.00103264	0.000670216	0.000254917	0.000255506		0.068142	0.0115506	0.0314102	0.022975	0.0385903	0.0182982	0.0264205	0.0282861
662	888.836	C57H110O5N	e54:3		0.00301029	0.000653217	0.00538852	0.00131205	0.00273263	0.000404982	0.00107705	0.00049348		0.00278639	0.000535133	0.00387943	0.000700706	0.000961619	0.000188468	0.000327878	0.000104361		0.00508598	0.000556386	0.00790913	0.00309606	0.00238175	0.000401428	0.000977256	0.000464192		0.348468	0.0620361	0.279104	0.0219964	0.0959453	0.0152616	0.0880701	0.0351121
663	890.851	C57H112O5N	e54:2		0.00893437	0.00114429	0.0140048	0.00412071	0.0177313	0.00463021	0.00622065	0.00117627		0.00830794	0.00121569	0.0100032	0.00213844	0.00634661	0.00213273	0.00201932	0.000474272		0.0152612	0.00161033	0.020354	0.00816704	0.0153129	0.00333739	0.00549649	0.000921167		1.04228	0.162503	0.714923	0.0605654	0.608448	0.0661251	0.512481	0.0505264
664	892.867	C57H114O5N	e54:1		0.00345502	0.000735395	0.00691567	0.00266328	0.0250386	0.00556464	0.00944419	0.0022111		0.00318382	0.000478144	0.00492352	0.0014478	0.00885728	0.00236845	0.00304069	0.000707114		0.00586906	0.000834517	0.0102221	0.00507644	0.0217229	0.00459314	0.00836883	0.00199232		0.400909	0.0743816	0.35012	0.0552705	0.861654	0.0397167	0.767907	0.0145177
665	894.752	C57H100O6N	54:7/e54:0		0.00613435	0.00358761	0.00411156	0.00218525	0.00883424	0.00215524	0.0071357	0.00370985		0.00574501	0.00351413	0.00303517	0.00171072	0.00311777	0.000847986	0.00253313	0.00173335		0.00991796	0.00477722	0.00556664	0.00284985	0.00767902	0.001891	0.00623979	0.00342231		0.711526	0.408705	0.240854	0.168423	0.302682	0.0215897	0.651486	0.46784
666	896.768	C57H102O6N	54:6		8.06094e-05	7.6828e-05	1.95144e-05	4.36355e-05	0.0010361	0.000550023	8.99851e-05	0.000135808		7.69822e-05	7.55814e-05	1.50111e-05	3.35657e-05	0.000361151	0.000190005	2.78254e-05	3.84098e-05		0.000127238	0.000125195	3.43747e-05	7.68641e-05	0.000913185	0.000532718	9.14535e-05	0.000151952		0.00927237	0.00908617	0.000966647	0.00216149	0.0338758	0.012643	0.00763061	0.0112841
667	898.784	C57H104O6N	54:5		0.000165377	5.42124e-05	0.000222117	0.000151381	0.00109889	0.000314305	0.000316376	0.000163959		0.000154466	5.42742e-05	0.000166933	0.000124732	0.000410109	0.000202726	0.000103772	6.54216e-05		0.000278681	7.48911e-05	0.000284127	0.000160263	0.000976223	0.00037222	0.000270604	0.000129911		0.0189182	0.00572167	0.0134703	0.0115214	0.038194	0.00940132	0.0253006	0.0130984
668	900.799	C57H106O6N	54:4		0.00118992	0.000406429	0.00217818	0.000620067	0.00205832	0.000808043	0.000406422	0.000251658		0.00109623	0.000330065	0.00157133	0.000402638	0.000743821	0.000334002	0.000135077	9.92349e-05		0.00199611	0.000493849	0.00319624	0.00137692	0.00183032	0.000828696	0.000347975	0.000218355		0.138376	0.0431846	0.112156	0.0162087	0.0691278	0.0216121	0.0311577	0.0196376
669	902.815	C57H108O6N	54:3		0.00688877	0.000668126	0.0165046	0.00420905	0.00443911	0.00140736	0.00120457	0.000752197		0.00641759	0.000893683	0.0118379	0.00191099	0.0016106	0.000674492	0.000395613	0.000231674		0.0117952	0.0012027	0.0241192	0.00924929	0.00391015	0.00142849	0.00101661	0.000603513		0.808544	0.146509	0.852298	0.03748	0.150099	0.0305486	0.0949122	0.044871
670	904.83	C57H110O6N	54:2		0.0188028	0.00198468	0.0395094	0.0121298	0.0431214	0.0107317	0.0137551	0.00305777		0.0174376	0.00161792	0.0282905	0.00658486	0.0152841	0.00449421	0.00439569	0.00076481		0.0322042	0.00352746	0.0580284	0.0253115	0.037715	0.0105376	0.0123118	0.00332416		2.19215	0.295481	2.01517	0.100002	1.4767	0.133064	1.12388	0.0778837
671	906.846	C57H112O6N	54:1		0.00414811	0.000795492	0.0112957	0.00296848	0.0181416	0.0046677	0.0061172	0.00153525		0.00383479	0.000610745	0.00815834	0.00179987	0.00636979	0.00164844	0.00196013	0.000403075		0.00719837	0.00205969	0.016629	0.0069514	0.0157311	0.00391778	0.00539716	0.00111854		0.475374	0.027309	0.584198	0.0564789	0.620887	0.0615996	0.501914	0.0700337
672	908.862	C57H114O6N	54:0/e56:7		0.000625052	0.000255125	0.000934185	0.000377624	0.00448682	0.00142817	0.00168889	0.000896347		0.000569163	0.000192319	0.000669785	0.000225871	0.00154667	0.000404782	0.000517957	0.000204236		0.00108166	0.000473935	0.00136566	0.000704981	0.00387499	0.00122542	0.00148445	0.000655119		0.0704599	0.0204149	0.0473743	0.00873431	0.152162	0.0254848	0.136021	0.0542312
673	910.82	C59H108O5N	e56:6		0.0138216	0.0093214	0.00857053	0.00588611	0.0049216	0.00357151	0.0083514	0.00499185		0.0129004	0.00862441	0.0061069	0.00376637	0.00162244	0.00101369	0.00298011	0.00218695		0.0220027	0.0134527	0.0114481	0.00784127	0.00401356	0.00261254	0.00724168	0.00467414		1.58742	1.00749	0.47593	0.316801	0.188207	0.15646	0.769151	0.607753
674	912.836	C59H110O5N	e56:5		0	0	4.10996e-06	9.19016e-06	0.00121094	0.000499202	3.65434e-05	8.17135e-05		0	0	3.16151e-06	7.06935e-06	0.000461369	0.000278244	1.17882e-05	2.63592e-05		0	0	7.23972e-06	1.61885e-05	0.00112949	0.000588153	3.26056e-05	7.29082e-05		0	0	0.000203588	0.000455236	0.0429838	0.0167256	0.00243231	0.00543881
675	914.851	C59H112O5N	e56:4		0.000296952	0.000205044	0.000380149	0.000299129	0.000620113	0.000396175	0.00013637	3.09083e-05		0.000272854	0.000189094	0.000278618	0.000204121	0.000219467	0.00012423	4.5337e-05	1.66283e-05		0.000504356	0.000322463	0.000579409	0.000494899	0.000509903	0.000223673	0.000118576	4.27711e-06		0.0333577	0.0221564	0.0196473	0.0132146	0.0202364	0.00980312	0.011371	0.00265355
676	916.867	C59H114O5N	e56:3		0.000753148	0.000181105	0.00108025	0.00060485	0.000642806	0.000164606	0.000257966	0.000137553		0.000701565	0.000175798	0.000752168	0.000365597	0.000239672	0.000114118	8.84834e-05	5.59035e-05		0.00133838	0.000520613	0.00162248	0.00104646	0.000583677	0.000228446	0.00024381	0.000158415		0.0886755	0.0263328	0.0518718	0.0188712	0.0228561	0.00652512	0.0242207	0.0195535
677	918.882	C59H116O5N	e56:2		0.00130516	0.000231802	0.00221358	0.000531953	0.00511493	0.00131798	0.00212976	0.00096668		0.00120763	0.000195676	0.00160608	0.000310625	0.00177634	0.000374169	0.000672878	0.000258857		0.00228806	0.000707767	0.00325399	0.0012499	0.00441563	0.00102644	0.00183155	0.000638322		0.151511	0.0265495	0.116549	0.022433	0.17574	0.0234738	0.167893	0.0485117
678	920.898	C59H118O5N	e56:1		0.000690625	0.00020514	0.00161798	0.000706956	0.010081	0.00237396	0.00484766	0.00120837		0.000646782	0.000216714	0.00113159	0.000393414	0.00365081	0.00138812	0.00153429	0.000229711		0.00115152	0.000228054	0.00237103	0.00121791	0.00890211	0.00273406	0.00444465	0.00170309		0.0816003	0.0272319	0.0798531	0.0224254	0.34992	0.0693235	0.399298	0.0775481
679	922.784	C59H104O6N	56:7/e56:0		0.000355511	0.000178734	1.99727e-05	4.46602e-05	0.002145	0.00105282	0.00157309	0.000599118		0.000331406	0.000168337	1.8157e-05	4.06002e-05	0.000690309	0.000227528	0.000504677	0.000203349		0.000611619	0.000339933	2.58621e-05	5.78295e-05	0.00176416	0.000686698	0.0013924	0.000603889		0.0394944	0.0188394	0.0016848	0.00376732	0.0742006	0.0348188	0.12427	0.0352032
680	924.799	C59H106O6N	56:6		0.000327423	0.000157207	0.000129929	6.80643e-05	0.000904053	0.000311768	0.000154745	0.000215774		0.000304043	0.000141728	9.51154e-05	5.02946e-05	0.000330583	0.000162629	5.21935e-05	7.20483e-05		0.00053595	0.000198353	0.000171141	6.27764e-05	0.000814636	0.000366331	0.00014854	0.000204178		0.0374547	0.0161804	0.00741749	0.00466788	0.032215	0.012203	0.0138374	0.019276
681	926.815	C59H108O6N	56:5		6.93941e-05	6.35727e-05	4.06365e-05	6.41012e-05	0.000747824	0.000634212	0.000295822	0.00019307		6.61367e-05	6.44585e-05	3.53595e-05	5.78877e-05	0.000254176	0.000176548	9.96952e-05	7.26877e-05		0.000111514	9.51058e-05	5.79003e-05	8.54496e-05	0.000586424	0.000327641	0.000269816	0.000203454		0.00840693	0.00778065	0.00303384	0.00535626	0.0241273	0.016129	0.0279601	0.0244328
682	928.83	C59H110O6N	56:4		0.000555134	0.000133323	0.000979667	0.000446534	0.000381362	0.000549118	2.39825e-05	3.8647e-05		0.000513486	0.000119103	0.000705999	0.000331891	0.00013613	0.000202189	9.44932e-06	1.67187e-05		0.000952368	0.000242693	0.0014746	0.000910993	0.000358286	0.000516743	1.74604e-05	2.85895e-05		0.0658141	0.0229466	0.0493419	0.0177068	0.011547	0.0147338	0.0020262	0.00347904
683	930.846	C59H112O6N	56:3		0.00170879	0.000381107	0.00273778	0.00108289	0.000628333	0.000367249	5.82737e-05	0.000107983		0.001583	0.000322004	0.00196727	0.000653387	0.000248306	0.000192738	2.05162e-05	3.8624e-05		0.00288055	0.000331271	0.00408821	0.00213053	0.000567753	0.000396787	5.98991e-05	0.000113801		0.199703	0.0457634	0.139472	0.0280375	0.0224148	0.0136792	0.00654959	0.0131112
684	932.862	C59H114O6N	56:2		0.00342069	0.00080538	0.00597415	0.00130045	0.00695026	0.00190762	0.00283856	0.00090808		0.00316088	0.000651649	0.00434932	0.000826218	0.00245766	0.000733828	0.000905697	0.000254301		0.00586343	0.00137793	0.008745	0.00329014	0.00604439	0.00167413	0.00259944	0.00126394		0.392628	0.062704	0.314829	0.0511539	0.237174	0.0309452	0.233968	0.0699167
685	934.877	C59H116O6N	56:1		0.0010118	0.000193507	0.00259038	0.000746913	0.00731218	0.00166259	0.00332136	0.00112542		0.000931518	0.000113341	0.00186847	0.000453348	0.00261615	0.00083349	0.00107967	0.000426751		0.00173383	0.000325037	0.00384124	0.00170121	0.00643487	0.00182367	0.00287447	0.000768209		0.118422	0.0282101	0.133523	0.0161546	0.251961	0.0290511	0.266525	0.0630073
686	936.836	C61H110O5N	e58:7/56:0		0.000548036	0.000270753	0.000293352	0.000149348	0.00351539	0.00218039	0.00115185	0.000737955		0.000499856	0.000213692	0.000208117	9.2057e-05	0.001245	0.000748738	0.000373283	0.000221669		0.000933412	0.000427314	0.000445321	0.000271885	0.00298549	0.0017707	0.000982304	0.000597388		0.0610793	0.0234225	0.0144994	0.00439865	0.111337	0.0501478	0.0910251	0.0453516
687	938.851	C61H112O5N	e58:6		1.39893e-05	1.91991e-05	0.000235241	0.000260305	0.00024189	0.000174921	1.97961e-05	3.17705e-05		1.28844e-05	1.79385e-05	0.000159811	0.000165407	7.69631e-05	5.79145e-05	6.97054e-06	1.04735e-05		2.09267e-05	2.87773e-05	0.000352327	0.000400276	0.000195673	0.000142848	1.68771e-05	2.82075e-05		0.00155448	0.00216097	0.011368	0.0112323	0.0083161	0.00653578	0.00144239	0.0021632
688	940.867	C61H114O5N	e58:5		7.22198e-05	7.89523e-05	3.46824e-05	3.37239e-05	0.000670518	0.000204457	3.17452e-05	4.51231e-05		6.41574e-05	6.4482e-05	2.75211e-05	2.92646e-05	0.000245248	0.000110115	9.37583e-06	1.30565e-05		0.000112675	0.00011435	5.13131e-05	4.84781e-05	0.000594502	0.000224931	2.44186e-05	3.36628e-05		0.00819533	0.00786041	0.00222712	0.00263378	0.0230013	0.0061573	0.00212802	0.00303048
689	942.882	C61H116O5N	e58:4		5.75943e-05	6.24057e-05	4.05114e-05	4.39669e-05	2.83131e-05	5.88666e-05	7.489e-05	0.000124225		5.67649e-05	6.26319e-05	2.69141e-05	2.83661e-05	8.93433e-06	1.76962e-05	3.11933e-05	5.39158e-05		9.37881e-05	9.78673e-05	6.34638e-05	6.74808e-05	2.49347e-05	5.09521e-05	6.09841e-05	9.3626e-05		0.00712815	0.00745332	0.00176437	0.00186073	0.00138015	0.00290458	0.00730226	0.0113725
690	944.898	C61H118O5N	e58:3		0.000126453	8.31141e-05	0.000156666	0.000170347	0.000180354	0.000116459	0.000104605	0.00013812		0.000118328	8.30409e-05	0.000113577	0.000118034	6.78773e-05	5.28257e-05	3.56779e-05	4.49966e-05		0.000227143	0.000153348	0.000250776	0.000290056	0.000162293	0.000117206	9.80577e-05	0.000128263		0.0151008	0.0107103	0.00734886	0.00686067	0.00729002	0.00629653	0.00902769	0.0111311
691	946.914	C61H120O5N	e58:2		0.000238858	0.000144504	0.000571856	0.000344326	0.00390941	0.00144807	0.00233562	0.00061629		0.000226539	0.00014075	0.000395811	0.000208684	0.00143243	0.000684916	0.000748925	0.000180842		0.000416349	0.000256883	0.000863957	0.00057238	0.00337061	0.00112177	0.00206303	0.000518246		0.0297404	0.0210876	0.0274752	0.0133812	0.133307	0.0359994	0.188856	0.0100868
692	948.929	C61H122O5N	e58:1/58:8		0.000247769	0.000130291	0.000396531	0.000288088	0.00382997	0.000866304	0.00168426	0.000701432		0.00023711	0.000137299	0.000284639	0.000186466	0.00135933	0.000387524	0.000538577	0.000187705		0.000429027	0.000225326	0.000596126	0.00048797	0.00340116	0.0010431	0.00147192	0.000464437		0.0288604	0.0156104	0.0199162	0.0104079	0.135871	0.0352132	0.141571	0.0581546
693	950.815	C61H108O6N	58:7/e58:0		0.000179341	0.000213868	4.86837e-05	7.43832e-05	0.00116377	0.000530026	0.0009637	0.000734559		0.00017015	0.000215046	3.59097e-05	5.66366e-05	0.000441303	0.000310977	0.000305071	0.000228707		0.000293716	0.000327104	8.33014e-05	0.00013005	0.0010498	0.000612135	0.000802299	0.000593085		0.0203321	0.0256901	0.00224487	0.00362919	0.0415137	0.0215077	0.0701579	0.0476614
694	952.83	C61H110O6N	58:6		5.89092e-05	0.000100563	3.46627e-05	5.03648e-05	8.87815e-05	0.000127188	1.51211e-05	3.17597e-05		5.08162e-05	8.3507e-05	2.27862e-05	3.23503e-05	2.84565e-05	3.94285e-05	5.45854e-06	1.13174e-05		8.92885e-05	0.000146566	4.52877e-05	7.08571e-05	6.48458e-05	8.88133e-05	1.56639e-05	3.34949e-05		0.00625261	0.0101068	0.00174329	0.00246075	0.00248256	0.00357732	0.00179652	0.00383049
695	954.846	C61H112O6N	58:5		3.57783e-05	3.85941e-05	9.29104e-06	2.07754e-05	7.56824e-05	8.53837e-05	7.15268e-05	4.39795e-05		3.19673e-05	3.29509e-05	8.4464e-06	1.88867e-05	2.99183e-05	3.3119e-05	2.34778e-05	1.3454e-05		5.72331e-05	5.7976e-05	1.20308e-05	2.69016e-05	7.37815e-05	8.1269e-05	7.02172e-05	4.81352e-05		0.00413277	0.00407808	0.000783748	0.00175251	0.00242475	0.00245383	0.00632338	0.00402607
696	956.862	C61H114O6N	58:4		8.13141e-05	6.83676e-05	0.000101753	9.93856e-05	4.2106e-05	6.22765e-05	0	0		7.8024e-05	6.87221e-05	7.5677e-05	7.07225e-05	1.22046e-05	1.80512e-05	0	0		0.000139176	0.000113524	0.000155227	0.000156017	2.97151e-05	4.11592e-05	0	0		0.00920505	0.00819004	0.00542589	0.005097	0.00126585	0.00181448	0	0
697	958.877	C61H116O6N	58:3		0.000404117	0.000119979	0.000673357	0.000280609	7.57434e-05	7.01405e-05	2.79899e-05	3.84953e-05		0.000379371	0.000119823	0.000480565	0.000176049	2.98859e-05	2.82957e-05	8.8049e-06	1.20845e-05		0.000719555	0.000299986	0.000997684	0.00054019	7.41917e-05	6.78658e-05	2.39985e-05	3.33707e-05		0.047971	0.0169356	0.0335855	0.00664584	0.0025445	0.00233892	0.00257192	0.00365348
698	960.893	C61H118O6N	58:2		0.00101777	0.000408819	0.00173441	0.000551263	0.00339178	0.00057503	0.00179483	0.000465303		0.000937811	0.000348566	0.00123701	0.000308665	0.00121059	0.000340116	0.000566353	7.39062e-05		0.00173055	0.000629506	0.00255647	0.00113988	0.00296298	0.000588462	0.00163189	0.000628942		0.115217	0.0377413	0.0879226	0.00995422	0.118167	0.0121486	0.146894	0.0260032
699	962.908	C61H120O6N	58:1		0.000296413	8.56448e-05	0.000586632	0.000438128	0.00509492	0.00133391	0.00237621	0.00109767		0.000280233	0.000100211	0.000431549	0.000301996	0.00178769	0.000458793	0.000734038	0.000276938		0.000508213	0.000135613	0.000878957	0.000761007	0.00442974	0.0011784	0.00212795	0.00108721		0.0349778	0.0117396	0.0297006	0.0180255	0.174989	0.0252951	0.184987	0.0583476
700	964.867	C63H114O5N	e60:7/58:0		0.000194575	0.00013068	0.000111392	6.83206e-05	0.00247891	0.000715188	0.00162384	0.000557742		0.000177572	0.000113252	8.38182e-05	5.60532e-05	0.000852501	0.000161956	0.000534212	0.000209314		0.000332052	0.000228545	0.00016912	0.000104293	0.00209568	0.000228634	0.00140794	0.000390365		0.0212006	0.0129613	0.00635198	0.00503343	0.0871463	0.0266144	0.130899	0.025384
701	966.882	C63H116O5N	e60:6		9.79608e-06	1.09731e-05	2.46003e-06	5.5008e-06	0	0	8.15634e-06	1.82381e-05		9.05976e-06	1.01925e-05	2.23639e-06	5.00073e-06	0	0	2.91298e-06	6.51362e-06		1.63038e-05	1.95297e-05	3.18544e-06	7.12286e-06	0	0	8.57431e-06	1.91727e-05		0.00126699	0.00155639	0.000207517	0.000464021	0	0	0.00098108	0.00219376
702	968.898	C63H118O5N	e60:5		0	0	1.20176e-05	2.68722e-05	0	0	0	0		0	0	7.51101e-06	1.67951e-05	0	0	0	0		0	0	1.7589e-05	3.93301e-05	0	0	0	0		0	0	0.000565985	0.00126558	0	0	0	0
703	970.914	C63H120O5N	e60:4		0	0	8.49225e-06	1.89893e-05	2.16888e-05	4.84977e-05	0	0		0	0	5.6615e-06	1.26595e-05	6.57238e-06	1.46963e-05	0	0		0	0	1.35699e-05	3.03432e-05	1.88299e-05	4.2105e-05	0	0		0	0	0.000326352	0.000729744	0.00106771	0.00238748	0	0
704	972.929	C63H122O5N	e60:3		1.29933e-05	1.82115e-05	9.25835e-06	2.07023e-05	3.95841e-05	8.85127e-05	2.71629e-05	3.7537e-05		1.17272e-05	1.61427e-05	6.61311e-06	1.47874e-05	1.14736e-05	2.56558e-05	9.45287e-06	1.30924e-05		1.93527e-05	2.69936e-05	9.53921e-06	2.13303e-05	2.37295e-05	5.30607e-05	1.9365e-05	2.66235e-05		0.00141703	0.00195238	0.000517671	0.00115755	0.00112087	0.00250635	0.00211058	0.00289427
705	974.945	C63H124O5N	e60:2		9.69161e-05	0.000112629	6.99347e-05	2.22052e-05	0.00051383	0.000236798	0.00030102	0.000351415		9.23528e-05	0.000113535	5.10362e-05	1.58496e-05	0.000185454	9.29877e-05	0.000104451	0.000113768		0.00015687	0.000171248	9.69152e-05	2.8616e-05	0.000447649	0.000209371	0.000267142	0.000317826		0.0118409	0.0138616	0.00381296	0.00154086	0.0172061	0.00726622	0.0243997	0.0240366
706	976.83	C63H110O6N	60:8/e60:1		1.87842e-05	3.3315e-05	3.68058e-05	2.41995e-05	0.000477803	0.000461103	0.000129122	0.000102069		1.70765e-05	3.02864e-05	2.58405e-05	1.57659e-05	0.000200452	0.000247621	4.02682e-05	3.4288e-05		3.51325e-05	6.0221e-05	4.93358e-05	3.34114e-05	0.00047421	0.000506099	0.000126181	0.000100558		0.00255062	0.00480094	0.00194736	0.0012149	0.0183677	0.0186259	0.0110289	0.00912252
707	978.846	C63H112O6N	60:7/e60:0		0.000261098	0.000121217	0.000180751	0.000162386	0.000355248	0.000200348	0.000224089	0.000177463		0.000237837	9.41685e-05	0.000125866	0.000110696	0.000137936	9.98306e-05	7.98865e-05	8.29625e-05		0.000436389	0.000170961	0.000259271	0.000243231	0.000318975	0.000209471	0.000188952	0.000125912		0.0307325	0.0145999	0.00840989	0.00720256	0.0120623	0.00612712	0.0193617	0.016218
708	980.862	C63H114O6N	60:6		1.53496e-05	1.87341e-05	4.78755e-05	7.48617e-05	1.00555e-07	2.24848e-07	4.25563e-05	9.51588e-05		1.47653e-05	1.86358e-05	3.38181e-05	4.88981e-05	3.72426e-08	8.32771e-08	1.37278e-05	3.06964e-05		2.82386e-05	3.28363e-05	6.77567e-05	0.000108888	9.48444e-08	2.12078e-07	3.79705e-05	8.49047e-05		0.00180597	0.00220853	0.00276571	0.00387051	2.75396e-06	6.15804e-06	0.00283253	0.00633372
709	982.877	C63H116O6N	60:5		5.39703e-06	1.20681e-05	1.45558e-05	3.25478e-05	0	0	3.12421e-05	6.98594e-05		5.39703e-06	1.20681e-05	9.70387e-06	2.16985e-05	0	0	1.35835e-05	3.03736e-05		8.22263e-06	1.83864e-05	2.32589e-05	5.20086e-05	0	0	2.31645e-05	5.17974e-05		0.000647297	0.0014474	0.00055937	0.00125079	0	0	0.00282745	0.00632238
710	984.893	C63H118O6N	60:4		1.51924e-05	3.39713e-05	2.77861e-05	4.86876e-05	1.66446e-05	3.72184e-05	2.15853e-05	4.82662e-05		1.26604e-05	2.83094e-05	2.01384e-05	3.47734e-05	4.82452e-06	1.07879e-05	6.96301e-06	1.55698e-05		2.22601e-05	4.97752e-05	3.25047e-05	5.07817e-05	1.5151e-05	3.38787e-05	1.92593e-05	4.30652e-05		0.00153947	0.00344235	0.00151982	0.00272448	0.000556379	0.0012441	0.00143671	0.00321258
711	986.908	C63H120O6N	60:3		5.75086e-05	6.37261e-05	0.000100236	0.000100428	0	0	1.64917e-05	3.68765e-05		5.28552e-05	5.81662e-05	7.35862e-05	7.70527e-05	0	0	7.1703e-06	1.60333e-05		0.000110431	0.000141324	0.000163521	0.000180612	0	0	1.22278e-05	2.73422e-05		0.00636172	0.00635448	0.00501669	0.00486439	0	0	0.00149252	0.00333738
712	988.924	C63H122O6N	60:2		0.000238563	0.000118124	0.000408714	0.00026058	0.000854756	0.000332002	0.000566311	0.000363428		0.000218865	9.55548e-05	0.000299464	0.000176888	0.000314076	0.000157928	0.000166361	9.38103e-05		0.000390835	0.000147943	0.000585279	0.000404624	0.000762581	0.00035214	0.000522406	0.000367367		0.0275626	0.0116409	0.0211644	0.0117659	0.0289231	0.0104315	0.0437991	0.0246809
713	990.94	C63H124O6N	60:1		2.25866e-05	2.71889e-05	4.11476e-05	5.63787e-05	0.00209081	0.000986236	0.00123683	0.000504237		2.00295e-05	2.39573e-05	3.46081e-05	4.78683e-05	0.000717166	0.000282729	0.000391371	0.000150145		4.15236e-05	5.40459e-05	6.26188e-05	8.68686e-05	0.00179898	0.000845162	0.00111143	0.000446176		0.00232119	0.00272744	0.00277422	0.00404837	0.0686917	0.0237443	0.103826	0.0493074
714	Total TAG 16:0 acyl containing				0.867981	0.123372	1.94364	0.517328	2.91946	0.704077	1.22832	0.280136		0.804406	0.100444	1.39398	0.254702	1.03745	0.312701	0.39579	0.0914483		1.50285	0.36025	2.83991	1.12018	2.54151	0.641617	1.09076	0.264791		100	0	100	0	100	0	100	0
715	764.674	C47H90O6N	44:2		0.00748594	0.00271442	0.00320372	0.00106758	0.00297604	0.0013014	0.00149806	0.00118365		0.000255974	0.000342959	0.000107609	8.96627e-05	4.34396e-05	4.48759e-05	3.00528e-05	1.85603e-05		0.0124301	0.00312648	0.00435992	0.000837056	0.00263352	0.0014165	0.00128611	0.00108308		0.901439	0.176281	0.321308	0.193593	0.114088	0.0483921	0.170898	0.115247
716	766.69	C47H92O6N	44:1		0.00209754	0.00135742	0.00271011	0.000935745	0	0	0	0		6.68547e-05	7.6254e-05	3.60089e-05	3.64373e-05	1.26354e-05	1.77404e-05	8.39601e-06	1.14968e-05		0.00343399	0.00189706	0.00398088	0.00175813	0	0	0	0		0.244702	0.102064	0.234091	0.0366945	0	0	0	0
717	768.706	C47H94O6N	44:0		0.000301252	0.000311347	0.000312447	0.000270587	0.000108451	0.000197568	0.000118782	0.000114987		0.000257515	0.000282667	0.000189092	0.000277158	2.52661e-05	3.51967e-05	1.384e-05	1.28636e-05		0.000465292	0.000465488	0.000401854	0.000302402	7.08053e-05	0.000116537	9.64392e-05	9.2258e-05		0.0323376	0.0284843	0.0356011	0.0372909	0.0038389	0.00704757	0.0177643	0.0199961
718	776.711	C49H94O5N	e46:3		0.000474651	0.000352673	0.000405165	0.000537711	0.000991998	0.000824658	0.000518498	0.000628917		0.000646484	0.000368485	0.000316788	0.000252584	6.34961e-05	8.15153e-05	6.85663e-05	0.000101958		0.000748501	0.000501008	0.000464271	0.000579372	0.000796989	0.000638292	0.000412236	0.000447483		0.0558675	0.0370405	0.0518752	0.0701879	0.0395673	0.0354546	0.0751309	0.117801
719	778.726	C49H96O5N	e46:2		0.0178634	0.00686398	0.00711183	0.00159452	0.0161714	0.00632104	0.00897449	0.00173586		0.000742746	0.000750538	0.000491665	0.000569677	8.58339e-05	6.19065e-05	9.88698e-05	0.000112186		0.0296028	0.00835439	0.00995091	0.00200771	0.0138409	0.00475731	0.00786369	0.000729974		2.14582	0.497526	0.68088	0.305654	0.632565	0.251192	1.03981	0.496784
720	780.742	C49H98O5N	e46:1		0.0017245	0.00090907	0.00129059	0.000671675	0.000989643	0.000798004	0.000221972	0.000382258		0.000159445	0.000272272	3.53198e-05	7.85622e-05	1.52549e-05	1.42943e-05	1.88418e-05	2.27412e-05		0.00280656	0.00113954	0.00172116	0.000559618	0.000946089	0.000757439	0.000226125	0.00040205		0.203416	0.0726361	0.132239	0.104256	0.0369076	0.0239915	0.0368531	0.072692
721	782.758	C49H100O5N	e46:0		0.000250107	0.000326677	4.44128e-05	6.9899e-05	0.00022961	0.000248642	7.22639e-05	9.7168e-05		4.57934e-05	7.60688e-05	7.04084e-05	0.000119108	0	0	0	0		0.000376781	0.000476126	6.19793e-05	0.000102678	0.000183485	0.000173726	5.64366e-05	7.31394e-05		0.0272866	0.0358536	0.00352372	0.00487282	0.00785993	0.00862795	0.00570903	0.00717646
722	790.69	C49H92O6N	46:3		0.000735989	0.000436578	0.00034265	0.000321344	0.00043234	0.000337409	0	0		0.000397769	0.000408946	9.17554e-05	8.4972e-05	0	0	1.61124e-06	2.21014e-06		0.0011991	0.000614289	0.000465041	0.000428961	0.000381712	0.000323207	0	0		0.0857892	0.035602	0.0372869	0.0440737	0.0176767	0.0156579	0	0
723	792.706	C49H94O6N	46:2		0.00829577	0.00381671	0.0045594	0.000911394	0.00477798	0.00256148	0.00117574	0.0011557		0.000145064	0.000215134	0.000124084	0.000187958	0	0	0	0		0.0136038	0.00476781	0.00636115	0.000805148	0.00426954	0.00272916	0.00104844	0.00108074		0.982925	0.283666	0.439723	0.210809	0.178128	0.0987132	0.132598	0.131428
724	794.721	C49H96O6N	46:1		0.00555981	0.00189767	0.0122268	0.00395583	0.00714716	0.00212609	0.0016279	0.00102979		0.000193955	0.000259312	0.000131513	0.000258617	6.66206e-06	1.40855e-05	1.32841e-05	1.66336e-05		0.00931804	0.00235655	0.018165	0.008569	0.0064423	0.00266409	0.00140141	0.00075847		0.668514	0.0882573	1.04954	0.0986592	0.27278	0.044188	0.152048	0.0520941
725	796.737	C49H98O6N	46:0		0.000215662	0.000424632	3.7786e-05	7.72189e-05	0.000106106	0.000227511	5.62916e-05	0.000125872		0.000181093	0.000220096	6.61697e-05	0.00014796	1.51354e-06	3.38438e-06	3.59413e-06	8.03672e-06		0.000317246	0.000621783	4.93804e-05	9.98154e-05	6.4557e-05	0.000135941	5.02257e-05	0.000112308		0.0237224	0.0476769	0.00513469	0.0109732	0.00381659	0.00810309	0.00449601	0.0100534
726	802.726	C51H96O5N	e48:4		0.000332648	0.000230917	8.30282e-05	6.22253e-05	0.000238005	0.00025864	0.000216409	0.000206795		0.000373289	0.000542934	0.000147477	0.000128389	3.52486e-06	7.62911e-06	1.47659e-05	2.75118e-05		0.000529032	0.000325097	0.000109276	7.12939e-05	0.000226826	0.000238197	0.000193829	0.000196314		0.0379236	0.0217924	0.00888702	0.00841681	0.00939153	0.0108621	0.0251309	0.0247559
727	804.742	C51H98O5N	e48:3		0.000391009	0.000344203	0.000226318	0.000122084	0.000222274	0.000166016	4.02811e-05	5.96434e-05		0.00088631	0.000400296	0.000398928	0.00025222	0.00017584	0.000223928	6.28562e-05	4.56649e-05		0.000617089	0.000510491	0.000310686	0.000145068	0.000194689	0.000148971	4.48609e-05	6.76356e-05		0.0450999	0.0324976	0.0211245	0.0153476	0.00844839	0.00727747	0.00447872	0.00625143
728	806.758	C51H100O5N	e48:2		0.0144267	0.00565013	0.00653102	0.00127453	0.00895139	0.00396142	0.00524067	0.0023935		0.000484261	0.000420353	0.000332018	0.000364345	3.7745e-05	3.79915e-05	7.12803e-05	4.53672e-05		0.0238625	0.00668043	0.00930763	0.00248012	0.00805996	0.00464882	0.00473314	0.00223024		1.73502	0.442738	0.604667	0.212959	0.34471	0.160563	0.540802	0.188938
729	808.773	C51H102O5N	e48:1		0.00279568	0.00107871	0.00420462	0.00131962	0.00742459	0.00299447	0.00118423	0.000722776		0.000127105	0.000270994	2.17712e-05	2.99787e-05	1.03229e-05	1.59734e-05	1.08957e-05	2.43636e-05		0.0046535	0.00127518	0.00627665	0.00301193	0.00655348	0.00303949	0.00101922	0.000634714		0.337613	0.0640185	0.363622	0.0328449	0.276319	0.0668719	0.110144	0.0657151
730	810.789	C51H104O5N	e48:0		8.9261e-05	0.000175032	9.99198e-05	0.000103047	0.000275455	0.000358246	0.000110604	0.000247266		1.98536e-05	4.43939e-05	7.44168e-06	1.66401e-05	2.31829e-05	2.45361e-05	1.25561e-05	1.71933e-05		0.00013239	0.000255802	0.00012618	0.00012394	0.00024681	0.000342376	7.62991e-05	0.000170572		0.0100398	0.0195827	0.0112343	0.0124369	0.0097603	0.0113254	0.00813929	0.018191
731	816.706	C51H94O6N	48:4		0.000226046	0.000151359	0.000100838	0.000119874	4.57153e-05	4.77603e-05	5.2739e-06	1.17928e-05		0.000275958	0.000269704	0.000214187	0.00025864	2.74253e-05	3.74948e-05	2.74502e-05	2.56026e-05		0.000367461	0.000204724	0.000121531	0.000128024	3.86451e-05	4.21858e-05	3.63811e-06	8.13506e-06		0.0264014	0.0136809	0.0124549	0.0158562	0.00197722	0.00220383	0.000388015	0.000867628
732	818.721	C51H96O6N	48:3		0.00137672	0.000484999	0.00192423	0.00051553	0.00140321	0.00140413	7.61884e-05	0.000112198		0.00290197	0.000675806	0.00162727	0.000482667	0.00188969	0.000597423	0.00141862	0.000281585		0.00228004	0.000500887	0.00281631	0.00110249	0.00115262	0.00118657	6.21046e-05	8.58282e-05		0.167842	0.0384481	0.169712	0.0285997	0.0546328	0.0623237	0.00863319	0.012046
733	820.737	C51H98O6N	48:2		0.0136886	0.00399591	0.0185559	0.00491146	0.0129361	0.00389551	0.00342762	0.00206522		7.09474e-05	0.000112858	9.17872e-06	2.05242e-05	6.74026e-06	1.50717e-05	0	0		0.0229826	0.00442213	0.027482	0.0117757	0.0116607	0.0049721	0.00296617	0.00153602		1.66655	0.149671	1.62231	0.152635	0.491023	0.0697435	0.323825	0.0997115
734	822.752	C51H100O6N	48:1		0.363628	0.0889896	0.384513	0.132899	1.14623	0.222029	0.653485	0.29083		0.000112744	0.000154987	5.71311e-05	6.72529e-05	5.35486e-06	1.19738e-05	1.09422e-05	2.44675e-05		0.616954	0.117783	0.571887	0.266589	1.00901	0.264586	0.598456	0.327095		44.597	0.722698	32.8214	2.97325	44.3674	7.33059	63.4263	4.13504
735	824.768	C51H102O6N	48:0		0	0	0	0	0	0	0	0		0.000116039	0.000128165	1.82334e-05	1.98868e-05	1.31307e-05	1.81123e-05	5.66037e-06	1.2657e-05		0	0	0	0	0	0	0	0		0	0	0	0	0	0	0	0
736	830.758	C53H100O5N	e50:4		0.00131014	0.000472914	0.000477028	0.000139038	0.0010838	0.00112189	0.000325622	0.000321495		2.36393e-05	4.62544e-05	6.97336e-05	0.000123769	4.71245e-06	6.55707e-06	1.60393e-05	3.14565e-05		0.00219454	0.000634648	0.000678916	0.000260643	0.00101112	0.00101604	0.000256535	0.000248288		0.159798	0.040278	0.0465576	0.0243304	0.0439357	0.0505055	0.0310535	0.0234979
737	832.773	C53H102O5N	e50:3		0.00084125	0.000700084	0.000841539	0.000251641	0.00393513	0.00579879	0.000517968	0.000464741		0.00526725	0.00161728	0.00224539	0.000741052	0.00152257	0.000524794	0.00124238	0.000577233		0.00136205	0.00104952	0.00125108	0.000553569	0.00339208	0.00504298	0.000464047	0.000409344		0.100258	0.0690308	0.0752552	0.024877	0.163968	0.261944	0.0560697	0.0480977
738	834.789	C53H104O5N	e50:2		0.0133282	0.00323245	0.0142114	0.00361126	0.0160743	0.00451723	0.00707279	0.00296948		0.000118632	0.000127338	7.09058e-05	7.9198e-05	4.61717e-07	1.03243e-06	0	0		0.0225047	0.00368879	0.0209577	0.00868257	0.0143777	0.00571842	0.00630042	0.00251737		1.6373	0.163043	1.24713	0.151946	0.613321	0.130124	0.714819	0.168261
739	836.804	C53H106O5N	e50:1		0.00886773	0.0020935	0.0158274	0.00527363	0.085756	0.0227828	0.0290434	0.0103998		5.99455e-05	5.46793e-05	7.40708e-06	1.02045e-05	0	0	0	0		0.0149973	0.00237821	0.0235893	0.0112249	0.0758028	0.0258774	0.0259027	0.0106953		1.08977	0.047514	1.3504	0.0691945	3.25865	0.161612	2.95404	0.635872
740	838.82	C53H108O5N	e50:0		0.000315193	0.000437461	0.000165618	0.000287762	8.38202e-05	0.000187428	0.000191631	0.000198248		0	0	3.50532e-06	4.81188e-06	5.95977e-06	1.33264e-05	7.92401e-06	1.77186e-05		0.00046984	0.00064968	0.000179294	0.000297044	7.62987e-05	0.000170609	0.000164627	0.000168772		0.0326067	0.0464263	0.0213158	0.0361779	0.00421031	0.00941455	0.0223637	0.0276991
741	844.737	C53H98O6N	50:4		0.000373964	0.00020084	0.000497199	0.000239218	0.000138187	0.000209007	5.35208e-05	4.93239e-05		0.000161332	0.00015794	0.000266369	0.000164151	9.37805e-05	6.65878e-05	2.76199e-05	2.05266e-05		0.000617604	0.000270761	0.000674253	0.000305362	0.00012889	0.000196455	4.90049e-05	4.55757e-05		0.0435212	0.0135471	0.0489795	0.03072	0.00494851	0.00684041	0.00587436	0.00659883
742	846.752	C53H100O6N	50:3		0.00415903	0.00135437	0.00934255	0.00344818	0.00446797	0.00161665	0.00130449	0.00111591		0.000643255	0.000555339	0.000284638	0.000264447	0.000312627	0.000297072	5.98856e-05	9.78216e-05		0.00705464	0.00191235	0.0140195	0.00734726	0.00397456	0.00178873	0.00104797	0.000825193		0.505995	0.0584237	0.790691	0.0740109	0.167407	0.033944	0.127907	0.0785814
743	848.768	C53H102O6N	50:2		0.0465611	0.00854557	0.105978	0.0371128	0.102864	0.0308673	0.0305231	0.0133599		0.00055729	0.00027244	0.00019062	0.000150275	0.000119471	9.59551e-05	7.1457e-05	4.84309e-05		0.0796329	0.0142476	0.158887	0.0802465	0.0910411	0.0340651	0.0273079	0.0130297		5.78138	0.400726	9.02224	0.455837	3.90481	0.588016	2.97681	0.268332
744	850.784	C53H104O6N	50:1		0.0279506	0.00529302	0.085819	0.0307644	0.169862	0.0546371	0.0391369	0.0173006		6.51426e-05	8.40473e-05	1.39136e-05	1.99345e-05	6.96972e-06	1.3544e-05	6.63892e-06	1.48451e-05		0.0480158	0.0107065	0.128912	0.0656184	0.150056	0.0579979	0.0350957	0.0174407		3.47494	0.385179	7.27774	0.344759	6.4331	0.984509	3.80149	0.388936
745	852.799	C53H106O6N	50:0		0.00067301	0.000260192	0.00102966	0.000549934	0.00126562	0.0011864	0.000446141	0.000534685		4.34626e-05	7.93627e-05	1.22785e-05	2.74556e-05	9.05076e-06	2.02381e-05	0	0		0.00110883	0.000321272	0.00140128	0.000631189	0.000992643	0.000706866	0.000396134	0.000476775		0.0827002	0.0269943	0.100102	0.0725988	0.0453536	0.0414767	0.0543064	0.0504145
746	856.773	C55H102O5N	e52:5		0.000170978	0.000171212	0.000104444	0.000143091	0.000221257	0.000275202	2.25191e-05	5.03543e-05		0.000236894	0.000102423	0.00015627	0.000147347	2.12012e-05	3.50465e-05	2.82644e-06	2.76712e-06		0.000265232	0.000245236	0.000121773	0.000169386	0.000198152	0.000263629	1.55345e-05	3.47361e-05		0.0188672	0.017078	0.0139469	0.0192053	0.00764939	0.00793539	0.0016568	0.00370471
747	858.789	C55H104O5N	e52:4		0.000565893	0.000286909	0.000421731	0.000222346	0.00042709	0.000269641	0.000132596	0.000123816		0	0	0	0	0.000299363	0.000192771	0.000228225	0.000396024		0.000925163	0.000374207	0.000619425	0.000372024	0.00035716	0.000186876	0.000124551	0.000113032		0.0663366	0.0243069	0.035521	0.0191128	0.0156947	0.00915245	0.0139671	0.0100238
748	860.804	C55H106O5N	e52:3		0	0	0	0	1.26883e-15	2.83718e-15	0	0		0	0	0	0	3.52452e-16	7.88106e-16	0	0		0	0	0	0	7.60624e-16	1.70081e-15	0	0		0	0	0	0	4.52724e-14	1.01232e-13	0	0
749	862.82	C55H108O5N	e52:2		0	0	0	0	0	0	0	0		0	0	0	0	0	0	0	0		0	0	0	0	0	0	0	0		0	0	0	0	0	0	0	0
750	864.836	C55H110O5N	e52:1		0.0115806	0.00195441	0.0176033	0.00548188	0.0615711	0.0184517	0.0200838	0.00672614		0.000120486	9.23704e-05	1.85063e-05	2.59723e-05	5.02448e-06	8.23666e-06	8.62118e-06	1.1805e-05		0.0197509	0.00275836	0.0262527	0.0123018	0.0547373	0.0211067	0.0180338	0.00718544		1.44259	0.124356	1.5191	0.104349	2.33889	0.333274	2.0514	0.332908
751	866.851	C55H112O5N	e52:0		9.59216e-05	0.000104542	3.88928e-05	8.69669e-05	0.000462003	0.000648068	7.96487e-05	0.0001781		0	0	3.91583e-05	8.75605e-05	0	0	4.55379e-06	1.01826e-05		0.000147498	0.000155914	4.00726e-05	8.9605e-05	0.000328342	0.000449648	5.90557e-05	0.000132053		0.0107338	0.0119077	0.00488793	0.0109297	0.0181445	0.0249325	0.0139356	0.031161
752	868.737	C55H98O6N	52:6		0.000140402	0.000227626	4.9601e-05	4.57378e-05	4.41229e-05	6.08082e-05	4.63457e-05	0.000103632		0.000137857	0.000243957	0	0	0	0	0	0		0.000210079	0.000332074	6.22048e-05	5.78081e-05	4.50163e-05	6.1643e-05	4.87207e-05	0.000108943		0.015601	0.0255184	0.00568494	0.00591642	0.00148313	0.00203667	0.00872181	0.0195026
753	870.752	C55H100O6N	52:5		5.3676e-05	8.39083e-05	1.82954e-05	1.83862e-05	4.37661e-05	6.08001e-05	3.36868e-05	4.69359e-05		9.5784e-05	0.000185982	0	0	0	0	0	0		8.43954e-05	0.000128114	2.2269e-05	2.0944e-05	3.94212e-05	5.4356e-05	2.6151e-05	3.58185e-05		0.00553332	0.007838	0.00208297	0.00230378	0.00165138	0.00245963	0.00256905	0.00355014
754	872.768	C55H102O6N	52:4		0.00129577	0.000405232	0.00226782	0.00057328	0.00152859	0.0010616	0.000149832	0.0002147		0.000798077	0.00159201	0.000127643	0.000161906	0.000217097	0.00018822	1.24435e-05	2.78244e-05		0.00218969	0.000582666	0.00333311	0.00138078	0.00137838	0.00104872	0.000157234	0.000236589		0.156818	0.0279457	0.201095	0.0354309	0.0554319	0.030425	0.0111813	0.015743
755	874.784	C55H104O6N	52:3		0	0	0.00671139	0.00918001	0.0317785	0.0193044	0	0		0.000431504	0.000964872	0	0	0	0	0	0		0	0	0.0112158	0.0161406	0.0290668	0.0203425	0	0		0	0	0.450727	0.602099	1.15572	0.487961	0	0
756	876.799	C55H106O6N	52:2		0.0915632	0.0169397	0.214749	0.0808897	0.387585	0.119418	0.0922195	0.0418521		0.000249445	0.000533523	0	0	9.61922e-05	0.000172833	0	0		0.156608	0.0286219	0.32358	0.170468	0.343523	0.131259	0.0824265	0.0408114		11.3675	0.822751	18.1263	1.3069	14.7677	2.83957	8.92475	1.0217
757	878.815	C55H108O6N	52:1		0.014252	0.00351522	0.0380769	0.0142742	0.0799186	0.0266663	0.0144089	0.00630253		0.000144156	0.000206519	0	0	2.78047e-05	6.21731e-05	2.85444e-05	2.68643e-05		0.0247203	0.0083727	0.0573383	0.0304075	0.0705468	0.0278518	0.0127952	0.00584858		1.77097	0.387969	3.22081	0.244716	3.02399	0.533631	1.40874	0.199649
758	880.83	C55H110O6N	52:0/e54:7		0.000585306	0.000288172	0.00082437	0.000720592	0.00199244	0.000928165	0.000246787	0.000230322		8.85232e-05	0.000127654	1.54126e-05	2.41348e-05	1.8281e-05	3.11729e-05	0	0		0.000966217	0.000363696	0.00122873	0.00103848	0.00176579	0.000922358	0.000216773	0.000198358		0.069614	0.0241903	0.0698292	0.0586231	0.0773836	0.0375861	0.0358979	0.0368962
759	882.789	C57H104O5N	e54:6		0.000164366	0.000123959	0.000108668	8.18149e-05	0.000197044	0.000295921	4.93801e-05	0.000110417		0.00157261	0.000800984	0.000466608	0.000241303	0.000257179	0.000367972	0.000179109	9.72819e-05		0.000263132	0.000190518	0.000157177	0.000135739	0.000192316	0.000277568	3.6613e-05	8.18692e-05		0.0186784	0.0129316	0.00953534	0.00627786	0.00917897	0.0145728	0.00863974	0.019319
760	884.804	C57H106O5N	e54:5		0.000102667	9.02849e-05	4.17088e-05	5.34102e-05	0.000117488	8.39127e-05	0.000132692	0.000134774		0.000161459	0.000169595	0	0	0	0	2.65136e-05	4.45637e-05		0.000172639	0.00015933	5.64141e-05	7.88489e-05	0.000108826	7.38685e-05	0.000114507	0.000112303		0.0140341	0.0150398	0.00387888	0.00387739	0.00487582	0.00390578	0.0182698	0.0191015
761	886.82	C57H108O5N	e54:4		0.00136534	0.000567119	0.00165498	0.000697387	0.00144951	0.000469361	0.000493809	0.000273619		3.49483e-05	7.81468e-05	0	0	5.00954e-05	5.97889e-05	1.10793e-05	1.42647e-05		0.00227926	0.000750121	0.00245206	0.00124776	0.00126769	0.000452771	0.000485624	0.000352386		0.162386	0.0404341	0.139839	0.0273427	0.0566592	0.0209563	0.0587404	0.0512435
762	888.836	C57H110O5N	e54:3		0.00724608	0.00149604	0.0139019	0.00601808	0.0142687	0.00444871	0.00313633	0.00130936		0.00284101	0.00105624	0.00115859	0.000468528	0.000360314	0.00039362	0.000341515	0.000259974		0.0125794	0.0036388	0.0211291	0.011952	0.0127686	0.00525004	0.00281691	0.00134309		0.906492	0.167008	1.15468	0.186843	0.543579	0.105766	0.311375	0.0590775
763	890.851	C57H112O5N	e54:2		0.00957486	0.00232753	0.016172	0.00570076	0.0383183	0.0110639	0.00868712	0.00481386		0	0	0	0	0	0	0	0		0.0163122	0.00367649	0.0242694	0.0124331	0.0338802	0.0122371	0.0077262	0.00468913		1.17378	0.0946056	1.37757	0.10621	1.45679	0.204108	0.800368	0.255009
764	892.867	C57H114O5N	e54:1		0.00226813	0.000639934	0.00223391	0.000990889	0.00959059	0.00432239	0.0028092	0.00200522		0.000158585	0.000155848	0.000128499	0.000187299	0	0	0	0		0.00383869	0.000808478	0.00331346	0.00176479	0.00849401	0.0043945	0.00256327	0.00225895		0.283352	0.0701727	0.189289	0.0409064	0.353088	0.0910333	0.247248	0.148711
765	894.752	C57H100O6N	54:7/e54:0		9.58687e-05	0.000133619	0.000130989	0.000164734	0.000200386	0.000278769	8.62667e-05	0.000152137		6.11747e-05	8.62383e-05	0	0	0	0	0	0		0.000156561	0.000201699	0.000198687	0.000266583	0.000208289	0.000296356	6.68148e-05	0.000105845		0.0100425	0.0123107	0.013372	0.0177206	0.00696213	0.0101344	0.00631215	0.0111952
766	896.768	C57H102O6N	54:6		9.69144e-05	0.000154296	3.85265e-06	8.61478e-06	0	0	0	0		1.80296e-05	3.37853e-05	1.57577e-07	3.52354e-07	0	0	0	0		0.000143528	0.000226522	6.1562e-06	1.37657e-05	0	0	0	0		0.0103386	0.0171689	0.0002809	0.000628112	0	0	0	0
767	898.784	C57H104O6N	54:5		0	0	0	0	0	0	0	0		0.000246222	0.000263762	0.000230093	0.00018616	0	0	0	0		0	0	0	0	0	0	0	0		0	0	0	0	0	0	0	0
768	900.799	C57H106O6N	54:4		0.00109451	0.000359856	0.00363386	0.00176439	0.0038868	0.00365645	0	0		6.20742e-05	6.71425e-05	0	0	0.000130883	0.000103369	3.30582e-05	4.73906e-05		0.00186681	0.000598868	0.00555897	0.00341951	0.00372287	0.00378508	0	0		0.132189	0.0214715	0.296632	0.061337	0.136873	0.113998	0	0
769	902.815	C57H108O6N	54:3		0.036699	0.00805961	0.0674241	0.0241012	0.14441	0.0422501	0.0325208	0.0163423		4.5183e-05	8.97653e-05	4.23903e-05	2.83586e-05	2.00324e-05	4.47938e-05	4.42457e-06	8.27396e-06		0.0628834	0.0144922	0.101248	0.0520124	0.128811	0.0498358	0.0289381	0.0155834		4.52983	0.374695	5.72735	0.336659	5.52493	1.11139	3.08964	0.594982
770	904.83	C57H110O6N	54:2		0.017224	0.00373097	0.0412092	0.0141189	0.106661	0.0291779	0.0207311	0.00975562		6.98831e-05	7.00351e-05	9.08927e-05	0.000134519	1.57267e-05	2.20307e-05	1.64653e-05	2.65728e-05		0.0295538	0.00683832	0.0616347	0.0304287	0.0945246	0.0334568	0.018309	0.00881267		2.13173	0.206636	3.51392	0.147842	4.07135	0.569873	2.00092	0.404619
771	906.846	C57H112O6N	54:1		0.00197756	0.0008928	0.00216231	0.0011029	0.011199	0.00486935	0.00177771	0.00086179		4.20908e-06	9.4118e-06	0	0	0	0	5.34902e-06	1.19608e-05		0.00350481	0.00194852	0.00328439	0.00207271	0.0100413	0.00518251	0.00154671	0.00073197		0.245658	0.104321	0.174576	0.0450088	0.419935	0.115772	0.181322	0.0759383
772	908.862	C57H114O6N	54:0/e56:7		0.000242578	0.00013096	0.000248612	0.000194828	0.000667173	0.000717872	0.000127099	0.000162163		2.13026e-05	3.70717e-05	1.60385e-05	2.70922e-05	0	0	0	0		0.000405248	0.000174308	0.000384967	0.000299088	0.000663311	0.000726273	0.000124925	0.000188921		0.0304745	0.0142976	0.0190273	0.0127355	0.0234619	0.0235511	0.0113419	0.0122542
773	910.82	C59H108O5N	e56:6		7.02691e-05	7.13799e-05	0.000226139	0.000149152	0.000893275	0.000551709	0.000175726	0.00013834		0.000672982	0.000377433	0.000184522	0.000117878	2.56179e-05	2.54168e-05	0.000132498	0.000116509		0.000112393	0.000105802	0.000344384	0.000264587	0.000745459	0.000415953	0.000153842	0.00012491		0.00751317	0.00698593	0.0177405	0.00905039	0.0326268	0.0154291	0.0203278	0.0249213
774	912.836	C59H110O5N	e56:5		7.18478e-05	4.74915e-05	0.000166659	3.75443e-05	0.000117145	0.000100732	2.66853e-05	3.81288e-05		3.15399e-05	4.42845e-05	2.54476e-05	2.16675e-05	8.23142e-06	1.8406e-05	9.63507e-06	1.38315e-05		0.0001285	8.56994e-05	0.000242315	9.16643e-05	0.000102669	8.99999e-05	2.79766e-05	4.1945e-05		0.010019	0.00826014	0.0157871	0.00667978	0.00446019	0.00437812	0.00199232	0.00279856
775	914.851	C59H112O5N	e56:4		0.00115942	0.000340297	0.0014825	0.000794954	0.000616133	0.000144889	0.000108732	0.000145892		3.68838e-05	7.81962e-05	0	0	4.23447e-05	4.34384e-05	9.18267e-05	7.68817e-05		0.00197468	0.000538634	0.00226882	0.00145864	0.000547835	0.000169073	9.08713e-05	0.000110664		0.1428	0.0281636	0.122088	0.0419475	0.0241081	0.0064334	0.0121647	0.0161027
776	916.867	C59H114O5N	e56:3		0.00236903	0.000783109	0.00290101	0.00126091	0.00618238	0.00212927	0.000804527	0.000875294		0.0209661	0.00289872	0.00633217	0.00206828	0.00531278	0.00311684	0.00318795	0.000767374		0.00400758	0.00111758	0.00440786	0.00246317	0.00555881	0.00243646	0.000633329	0.000622408		0.286698	0.0397331	0.243034	0.0563818	0.235354	0.0471543	0.0684643	0.0630018
777	918.882	C59H116O5N	e56:2		0.00141705	0.000436177	0.00240616	0.000694035	0.0103123	0.00268973	0.00276569	0.00131418		0	0	0	0	0	0	0	0		0.00240437	0.000638254	0.00357219	0.00160197	0.00917941	0.00325374	0.00245799	0.00122098		0.173728	0.0315978	0.210807	0.0315967	0.395109	0.0558494	0.266854	0.0412382
778	920.898	C59H118O5N	e56:1		0.0143915	0.00249711	0.00628779	0.00205947	0.0149207	0.00425656	0.00848852	0.00201263		0.000183709	0.000203076	1.43006e-05	1.4741e-05	1.26669e-05	2.83242e-05	1.45773e-05	1.99963e-05		0.0243313	0.00149367	0.00914012	0.00393822	0.0135023	0.00581992	0.00783195	0.00309879		1.82089	0.427806	0.560289	0.14646	0.568636	0.0967721	0.934499	0.326638
779	922.784	C59H104O6N	56:7/e56:0		0	0	0	0	0	0	0	0		0	0	9.54307e-06	2.1339e-05	1.52213e-05	1.44496e-05	0	0		0	0	0	0	0	0	0	0		0	0	0	0	0	0	0	0
780	924.799	C59H106O6N	56:6		0.000189176	0.000143949	0.000118439	0.000109979	0.000517892	0.000601975	7.43462e-05	8.44822e-05		0	0	0	0	0	0	0	0		0.000300098	0.000202633	0.000149987	0.000144218	0.000485433	0.000577951	6.0548e-05	7.50817e-05		0.0225675	0.015529	0.0128774	0.0123873	0.0178132	0.0170311	0.0075766	0.00817287
781	926.815	C59H108O6N	56:5		0.000332693	0.00030093	0.000716637	0.000233905	0.000885276	0.000322243	0.000122663	7.77645e-05		0	0	0	0	0	0	0	0		0.000524774	0.000429694	0.00107534	0.000537483	0.000802758	0.000410209	0.000106652	7.2123e-05		0.0364425	0.0277087	0.0628939	0.0138654	0.0358847	0.0170854	0.011134	0.00660779
782	928.83	C59H110O6N	56:4		0.00234718	0.000588638	0.00436126	0.00181757	0.00221865	0.000630145	0.000233467	0.000155985		5.43081e-05	3.64601e-05	5.53368e-06	1.23737e-05	2.14728e-05	2.99005e-05	9.65558e-06	1.32822e-05		0.00406055	0.0012504	0.00655374	0.00378769	0.00198356	0.000784862	0.000225069	0.000177955		0.290556	0.0497922	0.368221	0.0806933	0.0848805	0.0169314	0.0217426	0.00980367
783	930.846	C59H112O6N	56:3		0.00715832	0.00129961	0.0126777	0.00487854	0.024622	0.00620488	0.00455721	0.00255387		6.87583e-06	1.53748e-05	1.98273e-05	1.88533e-05	0	0	0	0		0.0122361	0.0020945	0.0191255	0.0104156	0.0220733	0.00819118	0.00414584	0.00267958		0.889611	0.065986	1.0709	0.104672	0.946078	0.154934	0.416324	0.090943
784	932.862	C59H114O6N	56:2		0.00162249	0.00049376	0.00366462	0.00129939	0.0102595	0.00346093	0.00230647	0.000887582		0.0194374	0.00448251	0.00741028	0.00216449	0.00289404	0.00148027	0.00220077	0.00089299		0.0028328	0.00112567	0.00550709	0.00269652	0.00929738	0.00427717	0.00206113	0.000867461		0.201652	0.0538183	0.312446	0.0424005	0.390918	0.0916487	0.233047	0.0358912
785	934.877	C59H116O6N	56:1		0.000409953	0.000353797	0.000502671	0.000292581	0.00292758	0.0012504	0.000852828	0.000200433		0	0	2.42749e-05	5.42804e-05	3.86666e-06	8.64612e-06	1.53132e-05	3.42414e-05		0.000713716	0.000565715	0.000672884	0.000374637	0.00251047	0.00105964	0.0007497	0.000153917		0.0486826	0.0329897	0.0501964	0.035932	0.109967	0.0368539	0.104997	0.0653
786	936.836	C61H110O5N	e58:7/56:0		0.0301133	0.00904964	0.0143479	0.00266626	0.0156894	0.0055821	0.0105122	0.00351378		9.99879e-06	5.56088e-06	6.02683e-06	7.50609e-06	4.20966e-06	9.41308e-06	0	0		0.0503665	0.00950599	0.0202074	0.00403688	0.0141983	0.00675785	0.00953598	0.00369258		3.67108	0.564144	1.36805	0.602456	0.608208	0.235816	1.12716	0.367104
787	938.851	C61H112O5N	e58:6		0	0	0	0	0.0001819	0.00040674	0	0		0.000999977	0.000274089	0.000101008	0.000133431	0.000144117	0.00018586	4.54097e-05	1.78402e-05		0	0	0	0	0.000171569	0.000383641	0	0		0	0	0	0	0.00528909	0.0118268	0	0
788	940.867	C61H114O5N	e58:5		0.00014333	0.000101021	0.000142008	0.000235264	0.000214011	0.000236364	2.03772e-05	4.55648e-05		0	0	0	0	4.99306e-06	1.11648e-05	7.08398e-06	9.7045e-06		0.000247978	0.000188766	0.00023424	0.000419794	0.000195762	0.000228136	1.40569e-05	3.14322e-05		0.0164068	0.0114701	0.0105608	0.0153395	0.00714649	0.00661584	0.00149921	0.00335233
789	942.882	C61H116O5N	e58:4		0.000556842	0.000138335	0.000438589	0.000102638	0.000300836	0.000196577	0.000178526	0.00014068		1.99728e-05	2.33713e-05	0	0	4.78895e-06	1.07084e-05	0	0		0.000946375	0.000201959	0.000644555	0.000251366	0.00028668	0.000222764	0.000180009	0.000166645		0.0681329	0.00378652	0.0400395	0.0121715	0.0126165	0.00958246	0.0200947	0.0129518
790	944.898	C61H118O5N	e58:3		0.000406312	0.0002159	0.000457774	0.000279134	0.00128472	0.000851874	0.000321496	0.000273564		3.3742e-05	3.89763e-05	3.25202e-05	2.27652e-05	1.09907e-05	2.4576e-05	0	0		0.000734202	0.000487525	0.000677552	0.000537863	0.00112263	0.000792435	0.000306405	0.000308424		0.0525715	0.0311156	0.0418211	0.0218284	0.0454773	0.0231641	0.0303567	0.0244595
791	946.914	C61H120O5N	e58:2		0.000289277	9.27436e-05	0.000458375	0.000415018	0.00314369	0.00119452	0.00100465	0.000534844		6.07441e-05	7.52017e-05	6.95554e-06	1.55531e-05	2.10029e-05	3.40324e-05	0	0		0.000487473	0.000129946	0.000675387	0.00061844	0.00276885	0.00120614	0.00092267	0.000645605		0.0353066	0.00832774	0.0400097	0.033192	0.117627	0.0194516	0.098856	0.0334774
792	948.929	C61H122O5N	e58:1/58:8		0.000374635	0.000247713	6.16916e-05	6.27034e-05	0.00201869	0.00066977	0.000190901	9.28234e-05		9.16751e-05	9.90745e-05	0	0	0	0	0	0		0.000612609	0.000363648	8.48855e-05	9.05724e-05	0.00185068	0.000773938	0.000182995	0.00010738		0.0443258	0.0280912	0.00528233	0.00523651	0.0791326	0.0255701	0.0233342	0.0184691
793	950.815	C61H108O6N	58:7/e58:0		0.000170603	0.000211758	0.000153043	0.000117712	0.000222737	0.000267442	0.000155361	0.00020132		0.000954397	0.000419647	0.000290621	0.000277641	6.88691e-05	8.45317e-05	2.95799e-05	4.06982e-05		0.000262784	0.000302987	0.000205524	0.00015739	0.000193004	0.000255529	0.000155065	0.000236559		0.0191114	0.0232728	0.0164544	0.015937	0.00753675	0.00785632	0.0128149	0.0139684
794	952.83	C61H110O6N	58:6		0.000135138	0.000105075	2.63271e-05	2.70349e-05	0.000277453	0.000138243	3.85626e-05	3.6775e-05		7.31506e-06	1.56566e-05	0	0	0	0	8.00024e-06	1.09568e-05		0.000219049	0.000167429	3.73229e-05	4.08286e-05	0.00023278	0.00011085	3.25781e-05	3.14241e-05		0.0156352	0.0118464	0.00215508	0.00201383	0.0106353	0.00517162	0.00446796	0.00584413
795	954.846	C61H112O6N	58:5		0.00019306	0.000174393	0.000263226	0.000167087	0.00010786	0.000176241	0	0		0.00173758	0.000696665	0.000393859	0.000185669	0.000255235	0.000271284	0.000143698	0.000113753		0.000311542	0.000273468	0.000410002	0.000312106	0.00011538	0.000196985	0	0		0.0214019	0.018721	0.0211623	0.00877191	0.00403186	0.00688811	0	0
796	956.862	C61H114O6N	58:4		0.000457065	0.000178983	0.000883252	0.000417104	0.000155064	0.000185413	1.21501e-05	2.71685e-05		0	0	4.98645e-06	1.115e-05	9.07574e-06	2.0294e-05	4.65756e-06	1.04146e-05		0.000800354	0.000368016	0.00133486	0.000816303	0.000141567	0.000178115	9.00874e-06	2.01442e-05		0.0589299	0.0286401	0.0725314	0.0202127	0.00504726	0.00547574	0.00212583	0.00475351
797	958.877	C61H116O6N	58:3		0.00173286	0.000417024	0.00228291	0.000989988	0.00423898	0.00181041	0.00108422	0.000598969		0.000715967	0.000767993	0.000108062	3.43599e-05	5.35483e-06	1.19738e-05	9.30782e-05	8.44424e-05		0.00294298	0.000595258	0.00344897	0.00197696	0.00377008	0.00184645	0.0010111	0.000699718		0.212407	0.0159868	0.188945	0.0278194	0.161817	0.0650753	0.103567	0.0281616
798	960.893	C61H118O6N	58:2		0.000340455	0.000178332	0.000886478	0.000310844	0.00325218	0.00246144	0.000972009	0.000824509		6.58975e-05	8.21288e-05	1.2518e-05	2.2993e-05	0	0	0	0		0.000597075	0.000379441	0.00130642	0.000674575	0.0028808	0.00235892	0.000961359	0.000988092		0.0407386	0.0223014	0.0785639	0.023623	0.113251	0.0720854	0.0868526	0.0530917
799	962.908	C61H120O6N	58:1		0.00106406	0.0004424	0.000744161	0.000311646	0.00250004	0.000361695	0.00118538	0.000300949		1.43769e-05	1.99459e-05	5.63094e-06	1.25912e-05	5.00672e-06	1.11954e-05	0	0		0.00189625	0.0010717	0.00101419	0.000409701	0.00223232	0.000687884	0.00103531	0.000221186		0.13318	0.0597297	0.0740128	0.0432325	0.097703	0.0154678	0.143796	0.0839642
800	964.867	C63H114O5N	e60:7/58:0		6.78904e-05	6.2651e-05	9.44282e-06	1.68064e-05	0.000170949	0.000257756	1.36589e-05	2.62211e-05		2.33145e-06	2.93735e-06	2.57274e-05	5.23212e-05	4.78895e-06	1.07084e-05	8.67769e-06	1.94039e-05		0.000118553	0.000109288	1.09611e-05	1.74414e-05	0.000118413	0.000156505	9.75258e-06	1.80165e-05		0.00843378	0.00775988	0.00108566	0.00213184	0.00594619	0.00914416	0.0010152	0.0019266
801	966.882	C63H116O5N	e60:6		8.09555e-06	1.81022e-05	0	0	2.8601e-05	6.39538e-05	0	0		3.43282e-05	5.4265e-05	6.71857e-06	1.50232e-05	0	0	0	0		1.23339e-05	2.75795e-05	0	0	1.71455e-05	3.83384e-05	0	0		0.000748521	0.00167374	0	0	0.0010205	0.00228191	0	0
802	968.898	C63H118O5N	e60:5		2.88638e-05	4.3443e-05	8.49225e-06	1.89893e-05	2.124e-05	4.74942e-05	1.50128e-05	3.35696e-05		2.3017e-05	3.28318e-05	1.19895e-05	1.66322e-05	7.92511e-06	1.77211e-05	4.17021e-06	9.32488e-06		4.28358e-05	6.39428e-05	1.35699e-05	3.03432e-05	2.00338e-05	4.47969e-05	1.03563e-05	2.31574e-05		0.00304929	0.00478644	0.000619178	0.00138452	0.000617595	0.00138098	0.00110453	0.00246981
803	970.914	C63H120O5N	e60:4		2.18411e-05	3.20988e-05	4.15429e-05	6.98812e-05	2.50755e-05	5.60704e-05	0	0		0.000125583	0.000120271	3.3492e-05	3.08924e-05	1.7103e-05	3.82434e-05	1.02774e-05	2.29811e-05		3.24465e-05	4.73231e-05	5.92344e-05	0.0001022	1.5032e-05	3.36126e-05	0	0		0.00229644	0.00351356	0.00352994	0.00509407	0.000894705	0.00200062	0	0
804	972.929	C63H122O5N	e60:3		7.48539e-05	4.64696e-05	7.07787e-05	7.66682e-05	0.000523978	0.000543246	5.16997e-05	7.42328e-05		2.1757e-05	3.40188e-05	0	0	8.26927e-06	1.84907e-05	1.12561e-05	2.51694e-05		0.000133579	9.59525e-05	0.000111395	0.000128004	0.000513504	0.000556369	3.96177e-05	5.48982e-05		0.00967712	0.00601201	0.00657177	0.00756695	0.018244	0.0169351	0.00392669	0.0055627
805	974.945	C63H124O5N	e60:2		0.000156306	0.000136864	0.000140429	0.000110944	0.00117602	0.000694594	0.000172567	0.000143886		1.73252e-05	1.73803e-05	1.44504e-05	3.23121e-05	6.50017e-06	1.45348e-05	7.3064e-06	1.01703e-05		0.000257541	0.000199306	0.000192732	0.000140085	0.00109531	0.000723595	0.000143023	0.000107419		0.0177573	0.0108643	0.0124913	0.0122474	0.0441479	0.0192183	0.0161746	0.012905
806	976.83	C63H110O6N	60:8/e60:1		0.000163464	7.38554e-05	7.3947e-05	8.2442e-05	0.000211543	0.000174477	0.00025901	0.000264524		3.14642e-05	4.30854e-05	5.53368e-06	1.23737e-05	5.35483e-06	1.19738e-05	0	0		0.000282429	0.000138156	9.3736e-05	0.000102187	0.00018613	0.000165539	0.00024614	0.000287689		0.0223561	0.0159268	0.00927176	0.0119348	0.00741529	0.0052509	0.0191469	0.0190846
807	978.846	C63H112O6N	60:7/e60:0		3.15538e-05	4.45253e-05	3.47308e-05	3.18629e-05	6.94537e-05	8.56334e-05	7.13663e-05	0.000101073		4.56751e-05	6.21935e-05	0	0	0	0	5.28266e-06	1.18124e-05		5.02174e-05	6.99071e-05	4.37808e-05	4.10526e-05	6.22352e-05	8.15796e-05	6.62305e-05	0.000100229		0.00335865	0.00460402	0.00384335	0.00377453	0.0023496	0.00254073	0.013055	0.0187093
808	980.862	C63H114O6N	60:6		3.38543e-05	4.14249e-05	1.48063e-05	2.08256e-05	9.10269e-05	0.000108606	0	0		7.70077e-05	6.97829e-05	1.85694e-05	2.85205e-05	6.57238e-06	1.46963e-05	1.26124e-05	1.74205e-05		5.62286e-05	6.93921e-05	2.19987e-05	3.01455e-05	6.54817e-05	6.73684e-05	0	0		0.00420001	0.00515251	0.00163155	0.00267859	0.00367551	0.00393219	0	0
809	982.877	C63H116O6N	60:5		3.27966e-05	4.18472e-05	2.78263e-05	3.36474e-05	0.000117281	0.000115039	1.57634e-05	3.5248e-05		2.48213e-05	3.15448e-05	1.51448e-05	2.41401e-05	0	0	0	0		4.99272e-05	6.1027e-05	4.17804e-05	4.98755e-05	9.79984e-05	9.16748e-05	1.80643e-05	4.03929e-05		0.00375386	0.00459125	0.00225687	0.00241895	0.00399773	0.00390034	0.00112557	0.00251685
810	984.893	C63H118O6N	60:4		0.00020593	4.94102e-05	0.000101221	5.94146e-05	0.000139486	0.00012728	0	0		0	0	0	0	2.77419e-05	1.97561e-05	0	0		0.00034802	6.90763e-05	0.000142436	7.52473e-05	0.000108448	7.63421e-05	0	0		0.0265177	0.0103759	0.0106818	0.0103836	0.00521032	0.00475684	0	0
811	986.908	C63H120O6N	60:3		0.000340108	0.000173947	0.000511221	0.000286376	0.00179399	0.00078815	0.000318658	0.00022272		9.71985e-05	0.000139726	8.77608e-05	9.99577e-05	2.90631e-05	2.00529e-05	1.82339e-05	4.07722e-05		0.000611155	0.000372452	0.000780284	0.000573583	0.00163308	0.000874323	0.000260768	0.000165558		0.0432079	0.0221956	0.0427236	0.0133034	0.0671607	0.0160691	0.0355043	0.0385537
812	988.924	C63H122O6N	60:2		0.00016075	0.000127199	0.000146266	0.000195633	0.00298717	0.00183907	0.00075482	0.000444722		0	0	2.78639e-05	3.0337e-05	5.24686e-06	1.17323e-05	0	0		0.000262564	0.000184277	0.000196675	0.000282477	0.0027515	0.00193907	0.000705558	0.000457401		0.018779	0.0120824	0.014227	0.0189475	0.110041	0.052037	0.071619	0.0385474
813	990.94	C63H124O6N	60:1		0.000339099	0.000301312	7.38224e-05	0.000102282	0.000681897	0.000540636	0.000421453	0.000193552		1.18066e-05	2.64003e-05	4.62903e-06	1.03508e-05	0	0	0	0		0.000536552	0.000442821	0.000114873	0.0001664	0.000662165	0.000530035	0.00039954	0.000217167		0.0384533	0.0343083	0.00729672	0.0105234	0.0258966	0.0177466	0.0483699	0.025722
814	Total 18:1 acyl containing				0.813976	0.189788	1.17038	0.386467	2.60983	0.556066	1.02293	0.434017		0.0696143	0.0166727	0.025389	0.00646433	0.0150303	0.00698686	0.0102983	0.00236485		1.38131	0.247796	1.74764	0.831014	2.30859	0.695072	0.928404	0.470304		100	0	100	0	100	0	100	0
815	764.674	C47H90O6N	44:2		0.000326611	0.00045473	0.000369314	0.000262068	6.2308e-05	6.55298e-05	4.68592e-05	0.00010478		0.000996505	0.000590609	0.000395644	0.000381202	2.66745e-06	5.96459e-06	0	0		0.00050233	0.000684519	0.000474753	0.000305858	5.14012e-05	5.77875e-05	3.47439e-05	7.76897e-05		0.17891	0.223693	0.198621	0.179644	0.015237	0.0180879	0.045215	0.101104
816	766.69	C47H92O6N	44:1		0.00235162	0.00133879	0.00122759	0.000668178	0.00092151	0.00071219	0.000465434	0.000371543		0.000526355	0.00030498	0.000391077	0.000420191	3.7428e-05	4.8216e-05	4.46648e-05	4.4692e-05		0.00382072	0.00180511	0.00180808	0.0010883	0.000869089	0.000639813	0.000411104	0.000319378		1.5398	0.480181	0.570538	0.229017	0.26881	0.277179	0.332255	0.210065
817	768.706	C47H94O6N	44:0		0.000611648	0.000509059	0.000838192	0.000150847	3.02019e-05	6.75335e-05	0	0		0.000679715	0.00029355	0.000200187	0.00013289	2.64916e-05	3.00777e-05	2.92492e-05	4.13871e-05		0.000963525	0.000733029	0.00118539	0.000257436	2.84866e-05	6.36981e-05	0	0		0.372579	0.225526	0.41619	0.174044	0.00473658	0.0105913	0	0
818	776.711	C49H94O5N	e46:3		4.3234e-05	9.66741e-05	0	0	6.51517e-05	7.09041e-05	0	0		0.00181071	0.000863933	0.000711655	0.000530904	0.000349135	0.000149979	0.000196683	0.000113426		6.33469e-05	0.000141648	0	0	6.30564e-05	6.76465e-05	0	0		0.024235	0.0541911	0	0	0.0209323	0.0274885	0	0
819	778.726	C49H96O5N	e46:2		0.000839464	0.00109927	0.00124819	0.00113884	0.00101149	0.000608719	0.000513034	0.000581855		0.00124691	0.000695089	0.000724384	0.000267589	0.000200934	0.000161186	0.000177977	0.000170775		0.00126238	0.00160601	0.00154354	0.00127292	0.00081242	0.000430714	0.000395038	0.000398131		0.473578	0.601736	0.723893	0.81179	0.281171	0.203027	0.42104	0.417503
820	780.742	C49H98O5N	e46:1		0.00654205	0.00312628	0.00287576	0.000925229	0.00590734	0.0005685	0.00332607	0.00142298		0.00167749	0.00146983	0.00113041	0.000727301	0.000213094	0.000179956	0.000207724	0.000149739		0.0107821	0.00396548	0.0039637	0.000854258	0.00524469	0.00121641	0.00305259	0.00153635		4.396	0.804098	1.3824	0.497444	1.60803	0.473851	2.64469	1.01436
821	782.758	C49H100O5N	e46:0		0	0	0.000202947	0.000234402	6.93421e-05	8.06366e-05	3.08742e-05	6.90369e-05		0.000133884	0.000161249	0.000126653	0.000152696	1.5258e-05	1.07214e-05	2.72325e-05	2.72194e-05		0	0	0.000238698	0.000248398	6.05723e-05	7.39906e-05	2.28918e-05	5.11876e-05		0	0	0.112253	0.131544	0.019602	0.0276347	0.0297909	0.0666146
822	790.69	C49H92O6N	46:3		0.00024346	0.000285959	0.000288873	0.000194239	0.000177186	0.000112304	0.000106746	0.000159411		0.00144785	0.000865011	0.000310941	0.000424186	7.35754e-05	0.000112393	0	0		0.000373552	0.000412939	0.000371297	0.000193643	0.000151056	0.000108499	9.94296e-05	0.00016292		0.14635	0.155317	0.147409	0.116335	0.0455921	0.0285328	0.101979	0.167358
823	792.706	C49H94O6N	46:2		0.000184399	0.000217548	0.000385049	0.000410137	0.000163382	0.000123289	3.84879e-05	5.35924e-05		0.000620274	0.000313453	0.000911735	0.00026135	2.07538e-05	3.57863e-05	0	0		0.000279509	0.000324075	0.000461446	0.000431159	0.000144608	0.000119811	3.53512e-05	5.20977e-05		0.101955	0.111699	0.209574	0.228887	0.0394867	0.0195192	0.0396705	0.0560631
824	794.721	C49H96O6N	46:1		0.0016115	0.00165409	0.000270044	0.000407567	0.000995049	0.000832907	0.00023136	0.000387605		0.000318548	0.000326234	0.000212516	0.000283936	2.81315e-05	2.98081e-05	1.39389e-05	2.12645e-05		0.00249836	0.00248097	0.000357741	0.00058356	0.000853833	0.000718084	0.0001958	0.000345584		0.936285	0.840801	0.105484	0.148078	0.250182	0.227511	0.147186	0.239575
825	796.737	C49H98O6N	46:0		0.000893069	0.000293542	0.00257787	0.000733704	0.000780416	0.0010008	0	0		0.000366587	0.000322715	0.00016433	0.000190061	2.13794e-05	2.1696e-05	5.88717e-05	4.848e-05		0.0014892	0.000304436	0.00370222	0.00130793	0.000725956	0.000960736	0	0		0.630546	0.127256	1.20472	0.20051	0.154381	0.153069	0	0
826	802.726	C51H96O5N	e48:4		6.08515e-05	9.34669e-05	9.43001e-05	0.000139544	0	0	3.41059e-05	4.67436e-05		0.000666426	0.000516687	0.000279484	0.000175678	8.9019e-05	3.99619e-05	0.00012148	9.3747e-05		9.16338e-05	0.000141969	0.000107013	0.000142201	0	0	3.07447e-05	4.35421e-05		0.0316778	0.0475321	0.0515721	0.0719325	0	0	0.0349376	0.0481555
827	804.742	C51H98O5N	e48:3		0.000128753	8.79523e-05	5.25707e-05	3.94044e-05	3.54215e-05	6.19674e-05	1.20332e-05	2.6907e-05		0.00171252	0.000762587	0.00067785	0.000466595	0.000223885	0.000178915	8.31089e-05	0.00012892		0.000207569	0.00011863	7.10172e-05	5.44935e-05	3.45593e-05	5.84719e-05	1.37896e-05	3.08344e-05		0.0840297	0.0407606	0.0257505	0.0165026	0.00640535	0.00987881	0.00911749	0.0203873
828	806.758	C51H100O5N	e48:2		0	0	1.88016e-05	4.20416e-05	0.000133316	8.00461e-05	0.000209287	0.000304871		0.00129313	0.000573606	0.000687311	0.000282349	0.000153806	9.22634e-05	5.63012e-05	7.8931e-05		0	0	2.43457e-05	5.44387e-05	0.000117081	7.71902e-05	0.000176155	0.000274328		0	0	0.0147514	0.0329852	0.0417706	0.0308412	0.145204	0.189478
829	808.773	C51H102O5N	e48:1		0.00503895	0.00201176	0.00227888	0.000783349	0.00352582	0.00103359	0.00244945	0.000596212		0.000936878	0.000796398	0.000477024	0.000533573	8.76969e-05	6.22636e-05	9.91841e-05	0.000115049		0.00835586	0.002235	0.00320254	0.00106186	0.00318162	0.00126038	0.00227037	0.000867747		3.48692	0.672955	1.06862	0.307414	0.989806	0.554776	1.984	0.486323
830	810.789	C51H104O5N	e48:0		0	0	0	0	0.000593808	0.000428194	1.48706e-05	3.32518e-05		0.000206358	0.000240081	0.000102533	0.00017369	7.02461e-05	4.9573e-05	2.90472e-05	3.96433e-05		0	0	0	0	0.000545833	0.000412654	1.10259e-05	2.46546e-05		0	0	0	0	0.142496	0.0826808	0.0143489	0.0320851
831	816.706	C51H94O6N	48:4		5.79291e-05	4.71774e-05	2.84645e-05	2.8329e-05	2.92342e-05	4.00345e-05	0	0		0.000802348	0.000392748	0.000356964	0.000235101	6.03555e-05	3.30819e-05	7.12547e-05	7.43884e-05		9.23098e-05	7.31812e-05	3.64743e-05	3.59109e-05	2.64892e-05	3.6354e-05	0	0		0.036702	0.0271075	0.0146818	0.0142972	0.00814006	0.0127533	0	0
832	818.721	C51H96O6N	48:3		8.92447e-05	8.60495e-05	7.79503e-05	8.52588e-05	0	0	3.64609e-05	8.15291e-05		0.00174221	0.00069088	0.00135812	0.00028058	0.000122693	0.000166455	3.67791e-05	5.17547e-05		0.000139462	0.000128785	9.56954e-05	0.000104853	0	0	2.5152e-05	5.62415e-05		0.0531153	0.0413779	0.0480468	0.0640345	0	0	0.0256595	0.0573764
833	820.737	C51H98O6N	48:2		0.000139475	0.000219909	0.000123785	0.000169799	0.000272625	0.00040905	0	0		0.0481057	0.0089074	0.0303263	0.00721457	0.0331319	0.0100036	0.0250172	0.00632005		0.000219045	0.000337401	0.000143158	0.000196782	0.000229943	0.000380716	0	0		0.0805985	0.116225	0.0788768	0.110714	0.0510219	0.0684232	0	0
834	822.752	C51H100O6N	48:1		0.00332146	0.0012007	0.00446902	0.00135794	0.0031855	0.00133962	0.00161511	0.000696427		8.02389e-05	0.00017942	1.97608e-05	4.41864e-05	7.69672e-05	8.28318e-05	5.45631e-05	7.47295e-05		0.00549811	0.00133161	0.00652407	0.00263048	0.00293688	0.00159405	0.00142181	0.000498973		2.29911	0.454466	2.05516	0.171708	0.823968	0.298145	1.2637	0.406295
835	824.768	C51H102O6N	48:0		0.0222725	0.00524688	0.0281278	0.0115867	0.0623644	0.0162769	0.0348863	0.0106184		0.000198751	0.000228452	1.3765e-05	3.07794e-05	3.51193e-05	2.99353e-05	3.23417e-05	3.61246e-05		0.0374251	0.00444016	0.0414077	0.0207475	0.0556346	0.0198981	0.032221	0.01419		15.7954	1.8016	12.5673	1.65369	16.1843	2.96556	27.4409	4.73332
836	830.758	C53H100O5N	e50:4		9.10727e-05	0.000139049	4.3644e-05	9.75908e-05	5.3629e-05	7.34346e-05	2.5732e-05	5.75386e-05		0.000757084	0.000303691	0.000357662	0.000219591	0.000182235	0.000311831	9.56322e-05	7.59052e-05		0.000135082	0.0002045	4.49679e-05	0.000100551	4.85692e-05	6.65957e-05	1.77508e-05	3.9692e-05		0.0494367	0.077305	0.0219451	0.0490707	0.0150116	0.0236454	0.018109	0.040493
837	832.773	C53H102O5N	e50:3		0.00012597	0.000199162	0.000198011	0.000247954	0.00011762	0.000173681	2.7891e-05	6.23662e-05		0.0014016	0.000424075	0.000997191	0.000342157	0.00060828	0.000345985	0.000311022	0.000175923		0.000198498	0.000301225	0.000233574	0.000264721	0.000109608	0.000163033	1.92401e-05	4.30223e-05		0.0723624	0.0982576	0.098457	0.12276	0.0232667	0.0319032	0.0196284	0.0438904
838	834.789	C53H104O5N	e50:2		0.000331491	0.000337151	0.000504601	0.000160938	0.0007752	0.000881731	0.000190698	0.000180801		0.00724366	0.0021106	0.00370943	0.000792366	0.00374403	0.00146202	0.00218163	0.000472523		0.000538119	0.000494709	0.000730532	0.000310102	0.000680186	0.000769875	0.000146141	0.000136582		0.208895	0.14749	0.237466	0.0580811	0.254817	0.37586	0.142907	0.135394
839	836.804	C53H106O5N	e50:1		0.00335216	0.0008608	0.00307068	0.000822098	0.00373836	0.000620939	0.00160606	0.0011289		0.000472807	0.000341631	0.000175133	0.000174882	2.62598e-05	5.87186e-05	9.63827e-06	1.35556e-05		0.00560821	0.000671437	0.00439826	0.00147386	0.00334358	0.00104362	0.00142697	0.000974207		2.36575	0.261397	1.42174	0.146451	0.990332	0.221572	1.18859	0.607044
840	838.82	C53H108O5N	e50:0		0.00357144	0.00170723	0.00489205	0.00196202	0.0138794	0.00410937	0.00531921	0.00142633		9.25525e-05	9.10096e-05	6.40504e-05	6.92256e-05	2.40746e-05	3.23852e-05	1.05653e-05	2.36248e-05		0.00583745	0.0021594	0.00706615	0.00335167	0.0123512	0.00471529	0.00467474	0.00107245		2.39248	0.617615	2.18334	0.411557	3.57102	0.591441	4.19393	0.546379
841	844.737	C53H98O6N	50:4		5.94649e-05	8.9847e-05	4.7037e-05	6.46877e-05	0	0	0	0		0.000641292	0.000325887	0.000730887	0.000135796	4.20545e-05	9.40367e-05	0	0		8.94896e-05	0.00013636	5.51351e-05	7.76092e-05	0	0	0	0		0.0310112	0.045809	0.0307567	0.0449055	0	0	0	0
842	846.752	C53H100O6N	50:3		3.78541e-05	4.51701e-05	0.000100104	0.000177162	3.59049e-05	4.91993e-05	0	0		0.00355966	0.000786476	0.00490976	0.00120785	0.000663157	0.000396533	0.000102342	0.000193412		5.73651e-05	6.6153e-05	0.000112223	0.000179467	3.0461e-05	4.42227e-05	0	0		0.0218198	0.0249829	0.0483834	0.0897329	0.00958967	0.0131378	0	0
843	848.768	C53H102O6N	50:2		0.0011468	0.000565479	0.00259784	0.000968999	0.00136918	0.000800672	0.000484511	0.00034385		0.00388035	0.000648176	0.00676672	0.00136315	0.00254941	0.000991037	0.000636775	0.000271692		0.00187183	0.00073817	0.0038328	0.00177834	0.00121681	0.000792128	0.000388535	0.000240129		0.763286	0.197702	1.18317	0.191603	0.327597	0.107263	0.389224	0.254054
844	850.784	C53H104O6N	50:1		0.00817355	0.00155839	0.0206026	0.00643827	0.0202065	0.00747183	0.00586801	0.00185345		0.000538645	0.000376541	0.000110423	0.000158937	8.7593e-06	1.95864e-05	1.00745e-05	2.25273e-05		0.0138593	0.00160771	0.0303109	0.0129928	0.017986	0.00799507	0.00525582	0.00207331		5.89824	1.0562	9.42071	1.04605	5.042	0.0998213	4.58994	1.03185
845	852.799	C53H106O6N	50:0		0.00704154	0.00375573	0.0217701	0.00753227	0.0458904	0.0210723	0.0102106	0.00273597		0.00017673	0.000115191	0.000180618	0.000194235	5.49059e-05	3.42782e-05	1.2556e-05	1.71933e-05		0.0128569	0.00929016	0.0320057	0.0144536	0.0403684	0.0206217	0.00909591	0.00288263		5.69304	4.68552	9.83422	0.958548	11.2105	1.35194	8.01795	1.1137
846	856.773	C55H102O5N	e52:5		4.21022e-05	4.19421e-05	3.70274e-05	8.27959e-05	5.2693e-05	5.71797e-05	0	0		0.00199806	0.000769109	0.00054782	0.000256037	0.000201706	0.000163472	0.000342171	0.000177543		6.9367e-05	6.93613e-05	3.81507e-05	8.53075e-05	5.00474e-05	5.31499e-05	0	0		0.0308335	0.0317855	0.0186182	0.0416315	0.0134997	0.0142446	0	0
847	858.789	C55H104O5N	e52:4		2.75602e-05	2.57933e-05	1.13803e-05	2.54472e-05	0	0	0	0		0.000357598	0.000242037	0.000379615	0.000170904	0	0	0	0		4.26584e-05	3.93339e-05	1.66562e-05	3.72444e-05	0	0	0	0		0.0165739	0.0154784	0.00384315	0.00859355	0	0	0	0
848	860.804	C55H106O5N	e52:3		0	0	0	0	0	0	0	0		0	0	3.70074e-16	8.27511e-16	0	0	0	0		0	0	0	0	0	0	0	0		0	0	0	0	0	0	0	0
849	862.82	C55H108O5N	e52:2		0	0	0	0	0	0	0	0		0	0	0	0	0	0	0	0		0	0	0	0	0	0	0	0		0	0	0	0	0	0	0	0
850	864.836	C55H110O5N	e52:1		0.00327803	0.00119416	0.0068394	0.00256865	0.0135517	0.0045316	0.00442364	0.00173715		0.000913265	0.000424361	0.00055043	0.000170159	0.000173389	0.000131002	0.000105869	6.15823e-05		0.00541536	0.00141673	0.0101263	0.00487761	0.0118785	0.00442743	0.00383862	0.00119184		2.26173	0.513861	3.08249	0.423255	3.40671	0.417326	3.42482	0.873638
851	866.851	C55H112O5N	e52:0		0.0028752	0.00100166	0.00377361	0.00146191	0.0101889	0.00427923	0.00296416	0.000780254		0.000226044	0.00028096	0.000127332	0.000175704	5.52178e-05	6.34817e-05	3.22353e-05	3.91427e-05		0.00476921	0.00106053	0.00548453	0.00255703	0.00891907	0.00404695	0.00261823	0.000729398		1.98211	0.186207	1.67907	0.28986	2.51022	0.463706	2.47616	0.997362
852	868.737	C55H98O6N	52:6		2.70738e-05	6.05389e-05	3.16354e-05	7.07389e-05	8.283e-06	1.85213e-05	2.44722e-05	4.22635e-05		0.000117305	9.78906e-05	9.02753e-06	2.01862e-05	1.62441e-05	3.6323e-05	0	0		3.96689e-05	8.87023e-05	3.25951e-05	7.28848e-05	7.53974e-06	1.68594e-05	2.57856e-05	4.86759e-05		0.0151764	0.0339354	0.015907	0.035569	0.00228672	0.00511326	0.0182754	0.0320262
853	870.752	C55H100O6N	52:5		5.80427e-05	5.12617e-05	5.19529e-05	7.78805e-05	2.95499e-05	6.60756e-05	1.43902e-05	3.21775e-05		0.000274226	0.000250435	0.000186538	0.000168977	2.49382e-05	5.57636e-05	0	0		9.11482e-05	7.4545e-05	5.98625e-05	7.89403e-05	2.78717e-05	6.2323e-05	1.28396e-05	2.87101e-05		0.0371746	0.0291603	0.0287742	0.0393497	0.00463433	0.0103627	0.00886915	0.019832
854	872.768	C55H102O6N	52:4		5.34439e-05	9.53952e-05	2.03687e-05	2.99627e-05	1.6761e-05	3.74787e-05	0	0		0	0	0	0	0	0	0	0		8.22396e-05	0.000144979	2.86158e-05	4.31777e-05	1.86414e-05	4.16835e-05	0	0		0.0286619	0.0473359	0.010046	0.013887	0.0047235	0.0105621	0	0
855	874.784	C55H104O6N	52:3		0.000196554	0.000219334	0.000193044	0.000158505	0.000346793	0.000414975	6.53211e-05	6.51035e-05		0.00727445	0.00166483	0.0117167	0.00224325	0.00331378	0.00174276	0.000470724	0.000317557		0.000302014	0.000315489	0.00030968	0.000286055	0.000324101	0.000405506	5.62043e-05	5.16757e-05		0.114999	0.114754	0.0889922	0.0778902	0.0711358	0.0724514	0.0451127	0.045211
856	876.799	C55H106O6N	52:2		0	0	0	0	0.00300278	0.00517633	0	0		0.00192785	0.000737537	0.00242485	0.000860575	0.00146526	0.000638488	0.000164745	0.00019847		0	0	0	0	0.00293566	0.00488925	0	0		0	0	0	0	0.547416	0.83066	0	0
857	878.815	C55H108O6N	52:1		0.0139879	0.00250251	0.0405384	0.0142716	0.0769483	0.0309349	0.0167783	0.00536774		0.00455681	0.00172377	0.000648221	0.000687363	0.000450074	0.000304721	0.000147371	0.000136329		0.0237141	0.00241925	0.0598036	0.0278447	0.0683808	0.0320846	0.0151164	0.00559117		10.1134	1.86838	18.3148	2.4319	18.955	2.29102	13.033	1.61446
858	880.83	C55H110O6N	52:0/e54:7		0.00512268	0.00225044	0.0103178	0.00332667	0.0253918	0.0115415	0.00631434	0.00200705		2.73564e-05	6.11708e-05	3.1002e-05	3.50087e-05	6.09305e-06	1.11942e-05	1.89316e-05	3.10441e-05		0.00915301	0.00556084	0.0151881	0.00664797	0.022524	0.0116846	0.00555684	0.00182378		3.97908	2.81664	4.69886	0.533103	6.20143	0.582443	4.93318	1.13402
859	882.789	C57H104O5N	e54:6		0.000194022	0.000295858	0.00043148	0.000414346	5.68733e-05	0.000119904	1.83686e-05	4.10734e-05		0.000195557	0.000257035	9.38385e-05	9.86772e-05	2.7778e-05	4.59993e-05	1.1122e-05	1.52582e-05		0.000304429	0.000428296	0.000628633	0.000633506	4.95754e-05	0.00010401	1.93099e-05	4.31782e-05		0.124357	0.162893	0.163992	0.138315	0.0222521	0.0486041	0.0198394	0.0443622
860	884.804	C57H106O5N	e54:5		2.35922e-06	5.27537e-06	8.27242e-05	0.000166312	2.28159e-05	5.10178e-05	1.82252e-05	4.07528e-05		0.00300338	0.00140943	0.000966277	0.000411001	0.000225921	0.000299201	0.000651668	0.000200982		5.07431e-06	1.13465e-05	9.02931e-05	0.000169895	2.15201e-05	4.81204e-05	1.35131e-05	3.02162e-05		0.00241578	0.00540185	0.041639	0.0836096	0.00357823	0.00800116	0.0175857	0.0393228
861	886.82	C57H108O5N	e54:4		4.38516e-05	2.91981e-05	7.49855e-05	6.538e-05	3.9226e-05	8.7712e-05	4.05356e-05	5.89625e-05		0.00082851	0.000189976	0.000995696	0.000255563	0.000160134	0.00011761	2.16673e-05	4.84497e-05		7.10585e-05	4.86537e-05	0.000102444	8.86125e-05	3.57061e-05	7.98413e-05	4.05297e-05	6.47036e-05		0.0296987	0.0225986	0.0416594	0.0513119	0.0108293	0.024215	0.0337476	0.0472197
862	888.836	C57H110O5N	e54:3		0.000259013	0.000201982	0.000339543	0.000301086	0.000195828	9.39645e-05	0.000102566	7.75566e-05		0.000542102	0.000348819	0.00043677	0.000136071	0.000472901	0.00031076	9.83322e-05	0.000100199		0.000467538	0.000423354	0.00052785	0.000476449	0.000166997	7.86963e-05	9.10938e-05	5.81154e-05		0.205891	0.20308	0.140778	0.0986058	0.056009	0.0433692	0.0771295	0.0539324
863	890.851	C57H112O5N	e54:2		0.000768425	0.000463048	0.00198203	0.000829911	0.0029627	0.00104472	0.00020769	0.000464409		0.00525114	0.00182658	0.00206766	0.000881105	0.00116465	0.000552562	0.000746558	0.000533455		0.00126619	0.000654739	0.00294803	0.00152761	0.0026676	0.00117416	0.000238005	0.000532195		0.511981	0.229403	0.883621	0.157149	0.749878	0.104434	0.157366	0.351881
864	892.867	C57H114O5N	e54:1		0	0	0	0	0.00491648	0.00227405	0.000229239	0.000200584		0	0	0	0	0	0	0	0		0	0	0	0	0.0044164	0.00240771	0.000181255	0.000155191		0	0	0	0	1.19828	0.164439	0.183815	0.177488
865	894.752	C57H100O6N	54:7/e54:0		0.000810137	0.000472997	0.00080015	0.000522899	0.00138283	0.00112287	0.000581875	0.000398501		0.00017779	0.000220421	7.74663e-05	0.000144481	0	0	0	0		0.00131901	0.000649091	0.00117265	0.000806077	0.00125706	0.00111218	0.000490802	0.000335492		0.530782	0.197255	0.32667	0.178949	0.321376	0.157673	0.43987	0.309749
866	896.768	C57H102O6N	54:6		0.000113275	0.000128564	3.77385e-05	5.25102e-05	6.86127e-05	8.02556e-05	2.08755e-05	3.31726e-05		0	0	0	0	0	0	0	0		0.000174335	0.000188666	4.5916e-05	6.29364e-05	6.22319e-05	7.17005e-05	2.16262e-05	3.77104e-05		0.0676632	0.071521	0.0162955	0.0242231	0.0198878	0.0284143	0.0169936	0.0256009
867	898.784	C57H104O6N	54:5		4.1808e-06	9.34856e-06	2.0952e-05	3.2439e-05	0	0	0	0		0.000101658	0.000227314	0	0	0	0	0	0		8.99225e-06	2.01073e-05	2.96202e-05	4.71304e-05	0	0	0	0		0.00428103	0.00957268	0.00984352	0.0134806	0	0	0	0
868	900.799	C57H106O6N	54:4		6.60825e-05	5.9818e-05	5.58205e-05	6.08533e-05	0	0	0	0		0.00339865	0.000794325	0.00382548	0.00112092	0.000113922	0.000156341	0	0		0.000102606	8.60679e-05	7.4436e-05	8.03946e-05	0	0	0	0		0.0403567	0.0313993	0.0364417	0.0472474	0	0	0	0
869	902.815	C57H108O6N	54:3		0.000575714	0.000181602	0.000930856	0.000652778	0.00178094	0.000974646	0.000152554	0.000225907		0.00133449	0.000407547	0.00199793	0.000116622	0.00132069	0.00063715	0.000373866	6.4467e-05		0.000960012	0.000238493	0.00137594	0.00106797	0.00168591	0.00120121	0.00011043	0.00016601		0.407145	0.118372	0.385506	0.180245	0.457441	0.269867	0.133634	0.211962
870	904.83	C57H110O6N	54:2		0.00682478	0.000731272	0.0137964	0.00434497	0.0360759	0.0146207	0.00832941	0.00320789		0.000627953	0.000256797	0.000353962	0.000101068	0.000111615	0.000161152	0	0		0.0116655	0.00111079	0.0202738	0.00872581	0.0324004	0.0158756	0.00760197	0.00359961		5.02817	1.21003	6.29077	0.656073	8.88341	1.53318	6.40159	1.31925
871	906.846	C57H112O6N	54:1		0.00290683	0.000465843	0.00688918	0.00205996	0.0198344	0.00777176	0.00273882	0.00122234		0.00010161	0.000137046	4.63865e-06	1.03723e-05	4.49691e-05	6.69191e-05	9.30263e-06	1.48821e-05		0.00497179	0.000778734	0.0101116	0.00421908	0.0177925	0.00845115	0.00245901	0.00129913		2.14649	0.596039	3.15837	0.290616	4.924	0.374786	2.08686	0.694944
872	908.862	C57H114O6N	54:0/e56:7		0.000332887	0.000681382	0	0	0.00266667	0.00141189	0.000937406	0.00121658		6.33394e-05	1.99586e-05	3.61409e-05	3.36904e-05	3.23646e-05	2.34872e-05	9.21028e-06	1.28372e-05		0.000505815	0.00103866	0	0	0.00243189	0.00155939	0.000806828	0.00106182		0.168833	0.342342	0	0	0.695914	0.371632	0.614362	0.754542
873	910.82	C59H108O5N	e56:6		2.35954e-05	5.2761e-05	1.0051e-06	2.24747e-06	8.67582e-05	0.000166968	1.36982e-05	2.11092e-05		7.01451e-05	7.19044e-05	3.3754e-05	4.943e-05	0	0	0	0		3.59487e-05	8.03838e-05	1.30148e-06	2.9102e-06	9.4769e-05	0.000186201	1.14298e-05	1.64088e-05		0.0118728	0.0265484	0.000788586	0.00176333	0.0231756	0.0474796	0.0136908	0.0205869
874	912.836	C59H110O5N	e56:5		1.49847e-05	2.05219e-05	2.02365e-05	1.96175e-05	5.20111e-05	6.51185e-05	0	0		0.00106133	0.000469218	0.000439336	0.00021472	0.00010615	7.07363e-05	0.000112247	0.000144613		2.23867e-05	3.06551e-05	3.0171e-05	2.90548e-05	4.34171e-05	5.77201e-05	0	0		0.00797584	0.0109631	0.0104604	0.0103406	0.0104622	0.011873	0	0
875	914.851	C59H112O5N	e56:4		1.3196e-05	2.60512e-05	2.41378e-05	3.20286e-05	1.66446e-05	3.72184e-05	1.21501e-05	2.71685e-05		0.0002628	0.000228016	0.000265564	0.000226376	0.000115681	0.000136933	4.96276e-05	5.11124e-05		2.24761e-05	4.4028e-05	3.64905e-05	5.59731e-05	1.5151e-05	3.38787e-05	9.00874e-06	2.01442e-05		0.0103211	0.0200394	0.0128317	0.0160325	0.00459514	0.010275	0.0117238	0.0262152
876	916.867	C59H114O5N	e56:3		9.0197e-05	3.7078e-05	0.000306422	0.000333005	9.3564e-05	6.56837e-05	1.94701e-05	4.35364e-05		0.000282236	0.000289809	7.91661e-05	0.000126041	0.000220355	0.000252119	8.80445e-05	6.73267e-05		0.000156372	7.11453e-05	0.000379734	0.0003099	9.26008e-05	7.32043e-05	1.44361e-05	3.22802e-05		0.0671627	0.0354832	0.151852	0.16983	0.0252268	0.0186402	0.0187869	0.0420088
877	918.882	C59H116O5N	e56:2		0.000289312	0.00025308	0.000328416	0.000286869	0.000789472	0.000526701	0.000209846	0.000110049		0.0348941	0.00780667	0.0115034	0.00267474	0.00813345	0.00531528	0.00491967	0.00132457		0.000490275	0.000380387	0.000521366	0.000489381	0.000712231	0.000513135	0.000189171	0.000107601		0.202174	0.132578	0.137602	0.115648	0.185417	0.0964236	0.15963	0.0559194
878	920.898	C59H118O5N	e56:1		0.000241649	0.000181406	0.00035091	0.000316905	0.00123772	0.000646474	8.83121e-05	0.000132625		0	0	1.57297e-05	3.51726e-05	0	0	0	0		0.000403049	0.000287511	0.000456857	0.000307442	0.00109087	0.000635966	9.84161e-05	0.000151087		0.17138	0.132908	0.159739	0.162073	0.309397	0.120342	0.0755775	0.106302
879	922.784	C59H104O6N	56:7/e56:0		0.0156579	0.00856273	0.0120521	0.00624332	0.0127493	0.00379243	0.00700591	0.00303142		0.000245978	0.000229751	5.58516e-05	9.22351e-05	4.80723e-05	4.65207e-05	1.66364e-05	1.61044e-05		0.0254546	0.0115626	0.0169953	0.00965965	0.0111554	0.00377464	0.00612016	0.00294988		10.3504	3.56465	5.3454	1.75733	3.31367	0.870115	6.03351	3.60575
880	924.799	C59H106O6N	56:6		0	0	0	0	0	0	0	0		0.000187928	0.000138368	2.49539e-05	3.55319e-05	2.43915e-05	3.53425e-05	3.72222e-07	8.32313e-07		0	0	0	0	0	0	0	0		0	0	0	0	0	0	0	0
881	926.815	C59H108O6N	56:5		5.67786e-05	8.69874e-05	0.000105501	0.000204589	0.0001613	0.000168897	0	0		6.34428e-05	0.000119356	0	0	9.03745e-06	2.02084e-05	0	0		8.54925e-05	0.000132112	0.000155993	0.000299006	0.000155822	0.000161166	0	0		0.0295656	0.0442536	0.0359026	0.0690144	0.0362438	0.0253794	0	0
882	928.83	C59H110O6N	56:4		0.000184347	0.000176111	0.000117856	5.6069e-05	0.000144904	0.000172711	2.84705e-06	6.36619e-06		0.000442603	0.000349782	0.000711051	5.26668e-05	0.000107836	9.43094e-05	0	0		0.000291129	0.000257493	0.000174121	9.64713e-05	0.000148555	0.000183711	2.54025e-06	5.68018e-06		0.112311	0.0872675	0.0553145	0.0208688	0.0333649	0.0431097	0.00175472	0.00392368
883	930.846	C59H112O6N	56:3		0.000322657	7.94713e-05	0.000949625	0.000331901	0.000693735	0.000388622	8.35799e-05	8.56217e-05		0.000275372	0.000277508	0.000356146	0.000209589	0.000168082	0.000106108	8.36353e-05	7.20134e-05		0.000560127	0.000165718	0.00141036	0.000685407	0.000614261	0.00038598	8.83705e-05	9.6327e-05		0.245989	0.0987407	0.450129	0.148825	0.17056	0.0861047	0.0674885	0.0693032
884	932.862	C59H114O6N	56:2		0.00112428	0.000232018	0.00199087	0.000701464	0.00470354	0.00187613	0.000833809	0.000302369		0.000233563	0.000201215	1.96119e-05	3.54846e-05	4.35829e-06	7.16312e-06	5.91389e-06	9.25407e-06		0.00189512	0.000171556	0.0029033	0.00129711	0.0042163	0.00202972	0.000736764	0.000291315		0.803552	0.112778	0.900878	0.229146	1.16934	0.0604967	0.648992	0.177597
885	934.877	C59H116O6N	56:1		0.000479609	9.64255e-05	0.00129336	0.000465867	0.00200318	0.00102552	0.000301566	0.000313352		0.0379884	0.0131281	0.0133279	0.00282568	0.00516478	0.00345007	0.0037033	0.0013269		0.000816208	0.000135307	0.00186416	0.00080049	0.00181157	0.00106398	0.000243743	0.000204821		0.345848	0.0710551	0.593887	0.106305	0.485841	0.0787895	0.221174	0.209972
886	936.836	C61H110O5N	e58:7/56:0		3.69317e-05	7.70378e-05	2.91721e-05	5.30172e-05	0.000420451	0.000385137	0.000264018	0.000229768		0	0	0	0	0	0	0	0		5.67558e-05	0.000117124	3.85717e-05	6.85697e-05	0.000400244	0.000376978	0.000260476	0.000223376		0.0192047	0.0384692	0.0207759	0.042137	0.0949299	0.0544608	0.203922	0.166884
887	938.851	C61H112O5N	e58:6		0.0147141	0.00946152	0.0121055	0.00615402	0.00531959	0.0015383	0.00465377	0.00260892		0.000123964	0.000205666	4.32867e-05	4.56757e-05	0	0	6.63186e-06	1.48293e-05		0.0234658	0.0128635	0.0162373	0.00700058	0.00452952	0.00100274	0.00400798	0.00245187		9.40273	4.15378	5.97243	3.34147	1.41872	0.519873	4.08928	2.93813
888	940.867	C61H114O5N	e58:5		0	0	0	0	0	0	0	0		0.00203427	0.00119442	0.000680703	0.000345735	0.000513857	0.000647563	0.000242938	0.000164817		0	0	0	0	0	0	0	0		0	0	0	0	0	0	0	0
889	942.882	C61H116O5N	e58:4		2.14343e-05	3.4294e-05	1.01171e-05	2.26225e-05	3.50939e-05	4.8166e-05	0	0		2.0226e-05	4.52267e-05	0	0	7.13677e-06	1.40923e-05	1.34456e-05	2.2931e-05		3.26978e-05	5.06621e-05	1.48074e-05	3.31103e-05	2.67506e-05	3.7522e-05	0	0		0.0132144	0.0197134	0.00341656	0.00763966	0.00728392	0.0106246	0	0
890	944.898	C61H118O5N	e58:3		0.000484667	0.000458425	0.000732356	0.000833973	0.000641465	0.000334965	0.000121729	2.07901e-05		0.000106634	8.82688e-05	4.47505e-05	5.18754e-05	1.70812e-05	1.20145e-05	3.72643e-05	3.40484e-05		0.000903479	0.0010289	0.00114826	0.00133545	0.000604463	0.000424538	0.000109176	2.51013e-05		0.399511	0.501394	0.2833	0.28841	0.165044	0.0885895	0.103073	0.03966
891	946.914	C61H120O5N	e58:2		1.23688e-05	1.80047e-05	0	0	0	0	0	0		5.19365e-05	4.97508e-05	5.16804e-05	6.87922e-05	3.85531e-05	4.30932e-05	2.07406e-05	2.17587e-05		2.10971e-05	3.17984e-05	0	0	0	0	0	0		0.009247	0.015205	0	0	0	0	0	0
892	948.929	C61H122O5N	e58:1/58:8		1.32126e-05	2.64121e-05	5.11834e-05	4.9323e-05	0.000284281	0.000183798	1.8357e-05	4.10474e-05		7.35763e-05	7.21554e-05	2.61468e-05	3.81025e-05	8.44283e-06	1.46658e-05	0	0		1.97584e-05	3.85697e-05	7.15894e-05	7.89877e-05	0.000273144	0.000221768	1.26633e-05	2.83159e-05		0.00778423	0.0146969	0.0229323	0.0184673	0.077387	0.0540301	0.0129188	0.0288873
893	950.815	C61H108O6N	58:7/e58:0		5.08347e-05	3.86769e-05	2.71631e-05	2.90417e-05	5.47021e-05	5.49824e-05	2.05588e-05	4.59708e-05		0.000155802	9.18922e-05	7.68742e-05	4.55778e-05	5.25066e-05	6.89379e-05	2.6097e-05	2.60145e-05		9.00243e-05	6.7148e-05	3.89081e-05	4.35638e-05	5.0746e-05	5.08355e-05	1.83434e-05	4.10171e-05		0.0395312	0.0316784	0.0131473	0.0149272	0.013889	0.0130736	0.012671	0.0283333
894	952.83	C61H110O6N	58:6		4.73946e-05	5.11711e-05	3.10372e-05	5.92447e-05	0.000194134	0.000203624	8.46025e-05	9.55524e-05		0.000147115	0.000148658	9.58623e-05	0.00013088	1.26135e-05	1.68292e-05	1.56453e-05	2.17836e-05		7.24122e-05	7.41342e-05	4.65711e-05	8.64622e-05	0.000155736	0.00016932	7.3493e-05	8.27696e-05		0.0277171	0.0270519	0.0111402	0.0198967	0.041678	0.0423217	0.0675382	0.066978
895	954.846	C61H112O6N	58:5		0.000101461	0.000101846	8.94477e-05	5.87253e-05	9.94511e-05	0.000142346	1.78549e-05	3.99247e-05		2.9119e-05	1.73734e-05	4.70904e-05	5.84234e-05	4.35531e-06	9.73876e-06	2.4307e-05	2.80057e-05		0.000155505	0.000148475	0.000116104	7.12946e-05	8.07398e-05	0.000126845	1.87698e-05	4.19706e-05		0.0592895	0.0531149	0.0476333	0.0431828	0.0192589	0.0263713	0.0192845	0.0431215
896	956.862	C61H114O6N	58:4		4.10203e-05	3.48128e-05	1.93459e-05	2.67096e-05	0	0	0	0		0.00314396	0.000796532	0.000745002	0.00028243	0.000464729	0.000491762	0.000403432	0.000346224		7.45767e-05	6.22129e-05	3.09086e-05	4.23253e-05	0	0	0	0		0.0347967	0.0302193	0.00802563	0.0110895	0	0	0	0
897	958.877	C61H116O6N	58:3		2.59169e-05	2.92462e-05	9.31185e-05	7.30538e-05	9.86298e-05	7.95249e-05	0	0		1.81764e-05	4.06437e-05	4.87638e-05	4.92042e-05	2.12806e-05	3.73638e-05	1.92126e-05	4.29606e-05		4.4683e-05	4.83002e-05	0.000120969	7.78575e-05	9.27023e-05	9.14931e-05	0	0		0.0192822	0.0206522	0.0485252	0.0384186	0.0250183	0.0232971	0	0
898	960.893	C61H118O6N	58:2		0.00127404	0.000528045	0.00106432	0.000919821	0.00153255	0.00106781	0.00026461	0.000294737		0.00197319	0.00132273	0.000484321	0.000122071	0.000105104	9.00232e-05	0.000173076	0.000179235		0.00223048	0.00115335	0.00158681	0.00145308	0.00129685	0.000945203	0.000223086	0.000262876		0.950237	0.562061	0.443744	0.288223	0.356521	0.187227	0.187913	0.183776
899	962.908	C61H120O6N	58:1		0	0	4.94204e-05	6.73722e-05	0.000431327	0.000386037	0.000176654	0.000151517		0	0	1.29936e-05	1.80032e-05	0	0	1.88288e-06	4.21025e-06		0	0	7.31292e-05	0.000111856	0.00039859	0.000375047	0.000143466	0.000106716		0	0	0.0247988	0.0344041	0.0977602	0.046814	0.13542	0.113381
900	964.867	C63H114O5N	e60:7/58:0		0.000556223	0.000404321	0.000317804	0.000232882	0.000721857	0.000391876	0.000378093	0.000392089		5.92078e-05	1.45447e-05	5.2602e-05	4.6454e-05	0	0	0	0		0.000958902	0.000688676	0.000446216	0.000343469	0.000671734	0.000405787	0.000318261	0.0003097		0.393428	0.274162	0.147791	0.0852991	0.179172	0.0611591	0.351888	0.398943
901	966.882	C63H116O5N	e60:6		5.05914e-06	7.24072e-06	4.99676e-06	1.11731e-05	0	0	0	0		5.22751e-05	4.51021e-05	4.22541e-05	6.63547e-05	8.74372e-07	1.95515e-06	5.15419e-05	6.82294e-05		8.07606e-06	1.1223e-05	6.47019e-06	1.44678e-05	0	0	0	0		0.00346386	0.00474361	0.00392038	0.00876624	0	0	0	0
902	968.898	C63H118O5N	e60:5		4.1808e-06	9.34856e-06	1.08351e-05	2.42281e-05	0	0	1.29771e-05	2.90177e-05		3.42504e-05	3.5356e-05	8.31332e-06	1.85891e-05	6.54588e-06	1.4637e-05	0	0		8.99225e-06	2.01073e-05	1.40302e-05	3.13724e-05	0	0	1.36421e-05	3.05048e-05		0.00428103	0.00957268	0.00850109	0.019009	0	0	0.0140162	0.0313412
903	970.914	C63H120O5N	e60:4		1.03106e-05	2.30551e-05	0	0	0	0	0	0		7.12071e-05	0.000121911	7.55662e-06	1.68971e-05	1.09968e-05	1.60618e-05	1.27279e-05	1.78428e-05		1.51071e-05	3.37806e-05	0	0	0	0	0	0		0.00577963	0.0129236	0	0	0	0	0	0
904	972.929	C63H122O5N	e60:3		1.59564e-05	2.4606e-05	1.71095e-05	2.48705e-05	0	0	0	0		0.000833952	0.000395412	0.000111055	9.84815e-05	3.31509e-05	4.0655e-05	1.49922e-05	2.05934e-05		2.7307e-05	3.9253e-05	2.54625e-05	3.86397e-05	0	0	0	0		0.0105169	0.0144591	0.00880046	0.0121595	0	0	0	0
905	974.945	C63H124O5N	e60:2		7.874e-06	1.76068e-05	2.04981e-05	4.58351e-05	8.33875e-05	0.000106969	0	0		6.51952e-05	8.97231e-05	3.20413e-05	4.07496e-05	1.41742e-05	1.72991e-05	6.40949e-06	1.03245e-05		1.42382e-05	3.18375e-05	2.11199e-05	4.72255e-05	7.58438e-05	9.74685e-05	0	0		0.00697068	0.0155869	0.0103069	0.0230469	0.0228704	0.0300657	0	0
906	976.83	C63H110O6N	60:8/e60:1		5.50398e-05	0.000107849	4.01326e-05	4.14408e-05	5.44099e-05	5.12027e-05	0	0		0.000151374	9.38231e-05	4.49416e-05	3.35557e-05	2.03238e-05	2.883e-05	1.56228e-05	1.67461e-05		8.48151e-05	0.000164032	6.39388e-05	6.56091e-05	5.30282e-05	4.88014e-05	0	0		0.0292214	0.0539044	0.0154979	0.0152432	0.0127231	0.0124531	0	0
907	978.846	C63H112O6N	60:7/e60:0		8.97644e-05	8.09839e-05	9.39657e-05	5.39574e-05	6.78048e-05	6.26547e-05	5.1279e-05	7.99457e-05		0.000164328	0.000136084	3.11468e-05	4.36916e-05	1.10257e-05	2.46542e-05	1.81388e-05	2.51473e-05		0.000146126	0.000120831	0.000129465	7.83435e-05	6.13622e-05	5.64672e-05	4.26147e-05	6.17564e-05		0.056772	0.0396571	0.0488822	0.0303191	0.0194058	0.0211497	0.0511874	0.0778424
908	980.862	C63H114O6N	60:6		8.99359e-06	1.42206e-05	7.00432e-06	1.56621e-05	1.12487e-05	2.5153e-05	0	0		6.24083e-05	9.15769e-05	1.47468e-05	2.21087e-05	0	0	8.88492e-06	1.98673e-05		1.63568e-05	2.45343e-05	7.2168e-06	1.61373e-05	9.766e-06	2.18374e-05	0	0		0.00756257	0.0112401	0.00352192	0.00787526	0.00453	0.0101294	0	0
909	982.877	C63H116O6N	60:5		0	0	7.07775e-06	1.58263e-05	1.84741e-05	4.13095e-05	1.29771e-05	2.90177e-05		0.000361142	0.000625662	5.21443e-05	3.54179e-05	2.4679e-05	2.71176e-05	6.74295e-06	1.50777e-05		0	0	9.16482e-06	2.04931e-05	1.10747e-05	2.47638e-05	1.36421e-05	3.05048e-05		0	0	0.0055531	0.0124171	0.00467744	0.0104591	0.0140162	0.0313412
910	984.893	C63H118O6N	60:4		0	0	1.20176e-05	2.68722e-05	0	0	1.99587e-05	4.4629e-05		0.000103865	0.000132685	6.26124e-05	9.22253e-05	1.03377e-05	1.42077e-05	2.15909e-05	2.04905e-05		0	0	1.7589e-05	3.93301e-05	0	0	1.47984e-05	3.30903e-05		0	0	0.00405837	0.00907478	0	0	0.0192584	0.0430631
911	986.908	C63H120O6N	60:3		7.24449e-05	0.000123541	2.71593e-05	3.72053e-05	8.50734e-05	2.84971e-05	2.46611e-05	5.51438e-05		5.96869e-05	0.000101683	6.61969e-06	9.46191e-06	1.58495e-05	2.37224e-05	3.90757e-06	8.7376e-06		0.000150094	0.000267954	3.14941e-05	4.34239e-05	7.31067e-05	2.35812e-05	1.7012e-05	3.80401e-05		0.0713723	0.127605	0.0173958	0.0245797	0.0243224	0.0136621	0.0173553	0.0388077
912	988.924	C63H122O6N	60:2		7.04526e-05	0.000115505	0.000116799	0.000110543	0.00033393	0.000135043	2.92936e-05	4.14612e-05		0.000180632	0.000112408	6.76205e-05	6.07104e-05	5.13959e-05	4.39128e-05	3.16297e-05	2.34239e-05		0.000107814	0.000167908	0.000159668	0.000158246	0.000302964	0.0001486	2.65737e-05	4.08162e-05		0.0438059	0.0636852	0.0505675	0.0363831	0.0857096	0.0341059	0.027244	0.0419111
913	990.94	C63H124O6N	60:1		1.52592e-05	1.87629e-05	1.68094e-05	2.34206e-05	0.000444371	0.000420007	7.5465e-05	7.00572e-05		1.88721e-05	2.19152e-05	1.05934e-05	2.36876e-05	0	0	1.51608e-05	2.54669e-05		2.90997e-05	3.61372e-05	2.84352e-05	4.01266e-05	0.000408321	0.000404034	7.13572e-05	7.2074e-05		0.0138821	0.0176537	0.00749447	0.0110447	0.101673	0.057306	0.0585125	0.0555152
914	Total 18:0 acyl containing				0.143491	0.043281	0.219174	0.0682009	0.399595	0.14402	0.12651	0.028391		0.203737	0.0484982	0.114792	0.0101762	0.0678726	0.0266637	0.0431031	0.00863253		0.239585	0.0418181	0.318392	0.128271	0.355629	0.155199	0.113641	0.0325841		100	0	100	0	100	0	100	0
915	Total signal				58.9575	8.65574	72.3918	15.7204	117.558	29.1052	114.86	24.8263		54.2109	8.76326	52.6682	15.0825	39.8468	7.79509	37.8688	13.372		100	0	100	0	100	0	100	0

## Sheet: percent polar neutrals
Percent polar, neutrals				% polar, % FFA,					Percent polar, neutrals							Percent polar, neutrals							Percent polar, neutrals							Percent polar, neutrals
				% DAG and TAG by acyl groups					5_Undiff_CG4_5							10_Diff_CG4_5							15_MSI1_OE_5							20_Mock_OE_5
Mass	Compound Formula	Compound Name	alternate IDs	1_Undiff_CG4_1	2_Undiff_CG4_2	3_Undiff_CG4_3	4_Undiff_CG4_4	5_Undiff_CG4_5	ave	stdev	6_Diff_CG4_1	7_Diff_CG4_2	8_Diff_CG4_3	9_Diff_CG4_4	10_Diff_CG4_5	ave	stdev	11_MSI1_OE_1	12_MSI1_OE_2	13_MSI1_OE_3	14_MSI1_OE_4	15_MSI1_OE_5	ave	stdev	16_Mock_OE_1	17_Mock_OE_2	18_Mock_OE_3	19_Mock_OE_4	20_Mock_OE_5	ave	stdev
494.3	C24H48O7PN	LPC(16:1)		0.0193661	0.00926834	0.0178042	0.00819682	0.01934	0.0147951	0.00558318	0.0526234	0.0127456	0.0514845	0.0249012	0.0069593	0.0297428	0.0213756	0.17979	0.160373	0.249033	0.273706	0.0890946	0.190399	0.0735777	0.244652	0.248634	0.24137	0.187089	0.226392	0.229627	0.0252234
496.3	C24H50O7PN	LPC(16:0)		0.0968306	0.16683	0.0712166	0.0655746	0.0870302	0.0974964	0.0407025	0.333282	0.0892189	0.262103	0.124506	0.0417558	0.170173	0.122664	0.293657	0.294018	0.42144	0.594456	0.2291	0.366534	0.145276	0.406123	0.535103	0.603425	0.449013	0.439063	0.486545	0.0808543
518.3	C26H48O7PN	LPC(18:3)		0.00968306	0.00926834	0.00890208	0.00819682	0	0.00721006	0.00406736	0.00584705	0	0	0	0	0.00116941	0.00261488	0.00599299	0.00381841	0.00638545	0.00427666	0	0.0040947	0.00253609	0.00978609	0.00540508	0	0.00935444	0.00686036	0.00628119	0.00394606
520.3	C26H50O7PN	LPC(18:2)		0	0.0185367	0.0356083	0.0327873	0.01934	0.0212545	0.0141584	0.0292352	0	0.0280825	0.00830041	0	0.0131236	0.0145866	0.107874	0.0725498	0.102167	0.106917	0.063639	0.0906293	0.0209232	0.0831817	0.0972914	0.0787076	0.112253	0.0823243	0.0907517	0.0139505
522.3	C26H52O7PN	LPC(18:1)		0	0.259513	0.160237	0.139346	0.18373	0.148565	0.0946559	0.339129	0.191183	0.271464	0.190909	0.111349	0.220807	0.0870613	1.31846	1.11498	1.53251	1.53532	0.852762	1.27081	0.29145	1.21347	1.5999	1.40624	1.46865	1.25545	1.38874	0.157929
524.4	C26H54O7PN	LPC(18:0)		0.12588	0.157562	0.106825	0.0409841	0.0870302	0.103656	0.043629	0.286505	0.11471	0.168495	0.0747037	0.0626337	0.14141	0.091042	0.113867	0.106916	0.159636	0.188173	0.063639	0.126446	0.0484671	0.190829	0.167557	0.230876	0.0935444	0.18523	0.173607	0.0503934
542.3	C28H48O7PN	LPC(20:5)		0	0.0185367	0.0267062	0.0163936	0.00967002	0.0142613	0.010027	0.0233882	0	0	0.0166008	0	0.0079978	0.0112113	0.029965	0.0229105	0.0255418	0.0213833	0.0254556	0.0250512	0.00326287	0.0146791	0.0162152	0.031483	0.0187089	0.0205811	0.0203335	0.00663221
544.3	C28H50O7PN	LPC(20:4)		0	0	0	0.00819682	0	0.00163936	0.00366573	0.00584705	0	0	0	0.0069593	0.00256127	0.00352914	0.0719159	0.0916419	0.102167	0.0812566	0.0127278	0.0719419	0.0349812	0.0685026	0.0810761	0.0734604	0.0748355	0.0823243	0.0760398	0.0056959
546.3	C28H52O7PN	LPC(20:3)		0.00968306	0.0185367	0	0.0163936	0.0290101	0.0147247	0.010766	0.0292352	0.0127456	0.0234021	0.0249012	0.0069593	0.0194487	0.00924733	0.0419509	0.0420025	0.0383127	0.0427666	0.0127278	0.0355521	0.0128761	0.0244652	0.0432406	0.0367302	0	0.0411622	0.0291196	0.0178323
548.4	C28H54O7PN	LPC(20:2)		0.0387322	0	0.00890208	0.0245905	0.00967002	0.016379	0.0152994	0.0233882	0.0127456	0.00936082	0.00830041	0.0139186	0.0135427	0.00597244	0.00599299	0.0152736	0	0.00855333	0	0.00596399	0.00641314	0.0146791	0.0108102	0	0.00935444	0.0137207	0.00971289	0.0058395
550.4	C28H56O7PN	LPC(20:1)		0.12588	0.0370734	0.0890208	0.0573777	0.0870302	0.0792764	0.0338659	0.0467764	0.0509822	0.0280825	0.0332016	0.0278372	0.037376	0.0108199	0.0839019	0.0763682	0.0957818	0.11547	0.0890946	0.0921233	0.0148613	0.0880748	0.145937	0.131179	0.140317	0.116626	0.124427	0.0231468
552.4	C28H58O7PN	LPC(20:0)		0.0387322	0.027805	0.0445104	0	0.00967002	0.0241435	0.0189304	0.0116941	0.0509822	0.0234021	0.0249012	0.0069593	0.0235878	0.017104	0.011986	0.0114552	0.0191564	0.01283	0.0381834	0.0187222	0.0113118	0.0146791	0.0378355	0.0157415	0.0280633	0.0205811	0.0233801	0.00965377
568.3	C30H50O7PN	LPC(22:6)		0.0193661	0.0185367	0	0	0.00967002	0.00951456	0.00948063	0.0116941	0.0127456	0.00468041	0.00830041	0.0139186	0.0102678	0.00376137	0.0539369	0.0534578	0.0638545	0.0555966	0.0381834	0.0530058	0.00928955	0.0440374	0.0594558	0.0472245	0.065481	0.0480225	0.0528443	0.00916232
570.3	C30H52O7PN	LPC(22:5)		0.0290492	0.0463417	0.0267062	0.0409841	0.0483501	0.0382863	0.00991048	0.0233882	0	0.00936082	0.0166008	0	0.00986997	0.0102852	0.0539369	0.0572762	0.0766255	0.0641499	0.0381834	0.0580344	0.014093	0.0636096	0.0540508	0.0524717	0.065481	0.0548829	0.0580992	0.00598454
Total LysoPC				0.513202	0.787809	0.596439	0.459022	0.599541	0.591203	0.124807	1.22203	0.548059	0.879917	0.556128	0.29925	0.701077	0.356815	2.37322	2.12304	2.89261	3.10486	1.55279	2.4093	0.619323	2.48077	3.10251	2.94891	2.72214	2.59322	2.76951	0.254837
676.5	C36H70O8PN	PC(28:1)		0.145246	0.139025	0.0890208	0.0655746	0.0773602	0.103245	0.0365229	0.111094	0.0509822	0.0561649	0.0581029	0.0487151	0.0650118	0.0260383	0.023972	0.0458209	0.0383127	0.0342133	0.0254556	0.0335549	0.00909612	0.0342513	0.0378355	0.0367302	0.0374177	0.0343018	0.0361073	0.00171731
704.5	C38H74O8PN	PC(30:1)		0.455104	0.33366	0.356083	0.377054	0.406141	0.385608	0.0471559	0.304047	0.305893	0.351031	0.332016	0.347965	0.32819	0.0224023	0.0719159	0.0152736	0.0319273	0.00427666	0.0763668	0.0399521	0.0327638	0.190829	0.070266	0.131179	0.16838	0.123487	0.136828	0.0462385
706.5	C38H76O8PN	PC(30:0)		1.62675	1.71464	1.97626	1.8115	1.53753	1.73334	0.169683	1.65471	1.5677	1.67559	1.75139	1.72591	1.67506	0.0713281	1.3664	0.882053	1.03444	0.975079	0.827307	1.01706	0.21115	1.82511	1.96204	2.03066	1.5809	1.85916	1.85157	0.171971
730.5	C40H76O8PN	PC(32:2)		0.629399	0.648784	0.747774	0.704927	0.734922	0.693161	0.0522015	0.730881	0.726497	0.716103	0.771938	0.751605	0.739405	0.0223019	0.263692	0.221468	0.261804	0.235216	0.254556	0.247347	0.018337	0.376764	0.36214	0.2781	0.33676	0.349878	0.340729	0.0380093
732.5	C40H78O8PN	PC(32:1)		8.1725	8.33224	8.80415	8.27879	8.49995	8.41753	0.246392	9.41375	9.34249	9.38422	9.99369	9.50641	9.52811	0.267149	5.86714	5.49851	6.17473	5.68369	5.11657	5.66813	0.396699	7.0362	7.032	6.85805	6.74455	7.03873	6.94191	0.134504
734.6	C40H80O8PN	PC(32:0)		2.55633	2.79904	3.0089	2.62298	2.63025	2.7235	0.182967	2.46161	2.28145	2.32148	2.39882	2.05299	2.30327	0.156242	1.82786	1.45481	1.43034	1.62513	1.22187	1.512	0.227312	2.57374	2.36202	2.42944	2.45086	2.73042	2.5093	0.145373
754.5	C42H76O8PN	PC(34:4)		0.00968306	0	0.0178042	0.0163936	0.01934	0.0126442	0.00797123	0.00584705	0.0127456	0.00936082	0.00830041	0.0069593	0.00864263	0.00265122	0.017979	0.0267289	0.0191564	0.0213833	0.0127278	0.0195951	0.00510031	0.0195722	0.0216203	0.0209887	0.0187089	0.0205811	0.0202942	0.00115734
756.5	C42H78O8PN	PC(34:3)		0.251759	0.240977	0.222552	0.254101	0.251421	0.244162	0.0130991	0.181259	0.267657	0.177856	0.240712	0.229657	0.219428	0.0389513	0.167804	0.160373	0.159636	0.158237	0.190917	0.167393	0.013664	0.16147	0.183773	0.183651	0.149671	0.18523	0.172759	0.0162476
758.6	C42H80O8PN	PC(34:2)		4.98677	4.89368	5.09199	5.09842	4.98006	5.01019	0.0858864	4.98169	5.18744	4.92847	5.34546	5.20556	5.12972	0.171787	2.91859	2.8829	3.03309	2.80977	2.68556	2.86598	0.129122	3.16091	3.02684	2.93842	2.94665	3.16949	3.04846	0.112065
760.6	C42H82O8PN	PC(34:1)		28.1196	25.7845	29.1721	28.0167	28.0527	27.8291	1.24032	28.7207	29.6844	28.9062	30.5123	29.0621	29.3771	0.730577	26.6209	25.3619	26.7167	25.6728	24.4755	25.7696	0.931654	26.5154	25.8255	25.5013	24.2561	26.3438	25.6884	0.897065
762.6	C42H84O8PN	PC(34:0)		0.5713	0.648784	0.560831	0.754107	0.531851	0.613375	0.0897729	0.403446	0.267657	0.294866	0.365218	0.375802	0.341398	0.0574545	0.35958	0.324565	0.255418	0.33358	0.432745	0.341177	0.0640539	0.78778	0.464837	0.487987	0.477076	0.528248	0.549186	0.135486
778.5	C44H76O8PN	PC(36:6)		0.0290492	0.027805	0.0356083	0.00819682	0.01934	0.0239999	0.0105615	0	0	0	0	0.0069593	0.00139186	0.0031123	0.023972	0.0305473	0.0255418	0.0342133	0.0381834	0.0304916	0.00591658	0.0342513	0.0378355	0.0367302	0.0280633	0.0205811	0.0314923	0.00717804
780.5	C44H78O8PN	PC(36:5)		0.0484153	0.0463417	0.0534125	0.0573777	0.0580201	0.0527135	0.0052316	0.0409293	0.0254911	0.0234021	0.0332016	0.0139186	0.0273886	0.0102235	0.143832	0.129826	0.127709	0.11547	0.11455	0.126277	0.0120118	0.117433	0.108102	0.0787076	0.112253	0.0891847	0.101136	0.0164588
782.6	C44H80O8PN	PC(36:4)		0.261443	0.203903	0.222552	0.278692	0.261091	0.245536	0.0310476	0.163717	0.165692	0.135732	0.157708	0.132227	0.151015	0.0158756	0.395537	0.427662	0.376742	0.367793	0.34365	0.382277	0.0314964	0.327834	0.270254	0.267606	0.280633	0.329297	0.295125	0.0309173
784.6	C44H82O8PN	PC(36:3)		1.45246	1.39952	1.49555	1.541	1.50852	1.47941	0.0547965	1.35067	1.35103	1.26371	1.55218	1.37794	1.37911	0.10591	0.845012	0.897327	0.874807	0.821119	0.86549	0.860751	0.0290526	0.753529	0.756711	0.682132	0.757709	0.782081	0.746432	0.0377111
786.6	C44H84O8PN	PC(36:2)		15.8996	14.9962	15.8991	16.8281	16.7872	16.082	0.758226	14.7346	16.0339	14.4016	16.1609	15.9646	15.4591	0.82488	8.74977	8.35087	8.53735	7.82202	8.68035	8.42807	0.371598	8.54815	8.49137	8.17509	8.11965	8.84301	8.43545	0.29557
788.6	C44H86O8PN	PC(36:1)		3.87322	3.08636	3.64095	3.50004	3.32649	3.48541	0.29971	3.29189	3.3011	3.29501	3.50277	3.47269	3.37269	0.105606	4.54269	3.91769	4.18247	4.38358	3.78015	4.16132	0.316201	3.92911	3.15656	3.41066	3.10567	3.59483	3.43937	0.337703
790.6	C44H88O8PN	PC(36:0)	ePC(38:7)	0.106514	0	0.0445104	0.0409841	0.11604	0.0616097	0.048715	0.0935528	0.152947	0.107649	0.107905	0.0765523	0.107721	0.0283621	0.203762	0.148918	0.121324	0.124023	0.190917	0.157789	0.0379457	0.0587165	0.0918863	0.157415	0.149671	0.123487	0.116235	0.0411327
806.6	C46H80O8PN	PC(38:6)		0.116197	0.157562	0.133531	0.131149	0.13538	0.134764	0.0148278	0.0760116	0.0637278	0.0421237	0.0498025	0.0347965	0.0532924	0.0166138	0.275678	0.248197	0.255418	0.277983	0.330923	0.27764	0.032418	0.195722	0.183773	0.167909	0.187089	0.226392	0.192177	0.021614
808.6	C46H82O8PN	PC(38:5)		0.329224	0.352197	0.284866	0.33607	0.319111	0.324294	0.0251144	0.15787	0.165692	0.11233	0.116206	0.0974303	0.129906	0.0300581	0.353587	0.389478	0.312887	0.299366	0.458201	0.362704	0.0640565	0.318048	0.308089	0.309583	0.318051	0.343018	0.319358	0.0140157
810.6	C46H84O8PN	PC(38:4)		0.639082	0.66732	0.667656	0.762304	0.821952	0.711663	0.0772967	0.543776	0.57355	0.454	0.522926	0.528907	0.524632	0.0440725	0.311636	0.309291	0.306502	0.248046	0.292739	0.293643	0.0265227	0.269117	0.264849	0.194145	0.25257	0.246973	0.245531	0.0300899
812.6	C46H86O8PN	PC(38:3)		0.968306	1.02879	1.08605	0.983618	1.03469	1.02029	0.046507	0.730881	0.892189	0.776948	0.929646	0.953425	0.856618	0.0976306	0.245713	0.236742	0.229876	0.188173	0.2291	0.225921	0.0221328	0.220187	0.221608	0.215134	0.196443	0.212671	0.213209	0.0100539
814.6	C46H88O8PN	PC(38:2)		1.8301	1.67757	1.85163	1.74592	1.70192	1.76143	0.0769184	1.51439	1.55496	1.30583	1.64348	1.67023	1.53778	0.144359	0.797068	0.771319	0.734327	0.727033	0.776395	0.761229	0.0296199	0.748636	0.718875	0.76084	0.692228	0.836964	0.751509	0.0547199
816.6	C46H90O8PN	PC(38:1)		0.242076	0.203903	0.231454	0.213117	0.261091	0.230328	0.022804	0.146176	0.216674	0.163814	0.166008	0.139186	0.166372	0.0303478	0.209755	0.171829	0.249033	0.119747	0.203645	0.190801	0.04828	0.185936	0.129722	0.146921	0.177734	0.240113	0.176085	0.0424246
818.7	C46H92O8PN	PC(38:0)	ePC(40:7)	0.0193661	0.0185367	0.0356083	0.0327873	0.0483501	0.0309297	0.0124108	0.0175411	0.0254911	0.0514845	0.0498025	0.0347965	0.0358232	0.0148554	0.137839	0.148918	0.153251	0.149683	0.216372	0.161213	0.0313704	0.0978609	0.0756711	0.0682132	0.112253	0.0823243	0.0872645	0.0177376
830.6	C48H80O8PN	PC(40:8)		0	0	0.0445104	0.0327873	0.0290101	0.0212615	0.020233	0	0.0127456	0.0140412	0	0	0.00535736	0.00735015	0.0839019	0.064913	0.0957818	0.0641499	0.0763668	0.0770227	0.0133418	0.0929678	0.0810761	0.0892019	0.0841899	0.0960451	0.0886962	0.00614167
832.6	C48H82O8PN	PC(40:7)		0.0580983	0.05561	0.0534125	0.0409841	0.0773602	0.057093	0.0131055	0.0116941	0.0127456	0.0140412	0.0166008	0.0069593	0.0124082	0.00355525	0.191776	0.171829	0.178793	0.158237	0.216372	0.183401	0.0220548	0.16147	0.129722	0.136426	0.159025	0.205811	0.158491	0.0298448
834.6	C48H84O8PN	PC(40:6)		0.135563	0.139025	0.169139	0.15574	0.15472	0.150837	0.0136649	0.0584705	0.0382367	0.0514845	0.0415021	0.0487151	0.0476818	0.00805177	0.197769	0.194739	0.191564	0.145407	0.178189	0.181533	0.0215344	0.171257	0.156747	0.125932	0.149671	0.212671	0.163256	0.0321164
836.6	C48H86O8PN	PC(40:5)		0.0968306	0.101952	0.0979228	0.131149	0.10637	0.106845	0.0140957	0.0409293	0.0764733	0.0514845	0.0664033	0.090471	0.0651523	0.0196489	0.143832	0.164192	0.146865	0.149683	0.190917	0.159098	0.0194275	0.132112	0.135127	0.115438	0.140317	0.150928	0.134784	0.0129689
838.6	C48H88O8PN	PC(40:4)		0.203344	0.16683	0.222552	0.196724	0.241751	0.20624	0.028192	0.169564	0.11471	0.102969	0.149407	0.118308	0.130992	0.0275601	0.0419509	0.0534578	0.0766255	0.0427666	0.0509112	0.0531424	0.0140485	0.0391444	0.0486457	0.0262359	0.0561266	0.0343018	0.0408909	0.0117633
840.6	C48H90O8PN	PC(40:3)		0.183978	0.194635	0.151335	0.15574	0.1934	0.175818	0.0208108	0.105247	0.127456	0.121691	0.124506	0.111349	0.11805	0.00938385	0.023972	0.0190921	0.0191564	0.0213833	0.0127278	0.0192663	0.00416592	0.0244652	0.0216203	0.0209887	0.00935444	0.0411622	0.0235182	0.0114326
842.7	C48H92O8PN	PC(40:2)		0.271126	0.27805	0.267062	0.245905	0.251421	0.262713	0.013555	0.228035	0.178438	0.135732	0.232411	0.222698	0.199463	0.0416699	0.0958879	0.0916419	0.0893964	0.0983633	0.0890946	0.0928768	0.00409608	0.0831817	0.0864812	0.0944491	0.0748355	0.102905	0.0883706	0.010746
852.5	C50H78O8PN	PC(42:11)		0.0193661	0.00926834	0.00890208	0.0163936	0	0.010786	0.00753748	0	0	0.00468041	0.00830041	0.0069593	0.00398803	0.00386372	0	0	0.0255418	0	0.0127278	0.00765392	0.0114178	0	0.0162152	0.0104943	0.0280633	0	0.0109546	0.0118385
854.6	C50H80O8PN	PC(42:10)		0	0.0185367	0.0356083	0.0409841	0.0290101	0.0248278	0.0162075	0	0.0382367	0.00468041	0.0166008	0.0069593	0.0132954	0.0151997	0.011986	0.0343657	0.0127709	0.02566	0.0127278	0.0195021	0.0100814	0.0195722	0.00540508	0.031483	0.0187089	0.0137207	0.017778	0.00950611
856.6	C50H82O8PN	PC(42:9)		0.0387322	0.027805	0.0356083	0.0409841	0.0386801	0.0363619	0.00515134	0.00584705	0.0127456	0.0374433	0.0415021	0.0139186	0.0222913	0.0160489	0.0599299	0.0381841	0.0446982	0.0427666	0.0509112	0.047298	0.00841094	0.0440374	0.0594558	0.0262359	0.0467722	0.0274414	0.0407885	0.0140067
858.6	C50H84O8PN	PC(42:8)		0	0	0	0.0327873	0	0.00655746	0.0146629	0.00584705	0	0	0	0.0069593	0.00256127	0.00352914	0	0.0190921	0.0255418	0.01283	0	0.0114928	0.0114136	0.0195722	0.0162152	0.0209887	0.0187089	0.0274414	0.0205853	0.00420756
860.6	C50H86O8PN	PC(42:7)		0	0.00926834	0.00890208	0	0	0.00363408	0.00497786	0	0	0.00468041	0	0	0.000936082	0.00209314	0.011986	0.0152736	0.0127709	0.0213833	0.0381834	0.0199194	0.0108552	0.0146791	0.0216203	0.0104943	0.00935444	0.0137207	0.0139738	0.00480822
862.6	C50H88O8PN	PC(42:6)		0	0	0	0.0245905	0.0290101	0.0107201	0.014762	0.00584705	0	0	0.00830041	0	0.00282949	0.00397035	0.029965	0.0343657	0.0319273	0.0342133	0.0381834	0.0337309	0.00307797	0.0146791	0.0270254	0.0262359	0.0374177	0.0205811	0.0251878	0.00845134
864.6	C50H90O8PN	PC(42:5)		0	0.00926834	0.00890208	0	0.0290101	0.0094361	0.0118483	0	0.0127456	0	0.00830041	0	0.00420919	0.0059741	0.023972	0.0229105	0.0255418	0.0213833	0.0127278	0.0213071	0.0050303	0.0146791	0.0108102	0.0104943	0	0.0205811	0.0113129	0.0075189
866.7	C50H92O8PN	PC(42:4)		0.00968306	0.00926834	0	0.0409841	0.0290101	0.0177891	0.0167233	0	0	0.00936082	0.0249012	0.0139186	0.00963613	0.0104541	0.00599299	0.00381841	0	0.01283	0.0127278	0.00707384	0.00563262	0.00489304	0	0.0157415	0.00935444	0	0.0059978	0.00669654
868.7	C50H94O8PN	PC(42:3)		0.12588	0.157562	0.160237	0.163936	0.222411	0.166005	0.0350016	0.0877057	0.101964	0.0421237	0.116206	0.10439	0.0904778	0.028867	0.0659229	0.0496394	0.0638545	0.0342133	0.0509112	0.0529083	0.0127806	0.0244652	0.0324305	0.031483	0.0841899	0.0480225	0.0441182	0.0239973
870.7	C50H96O8PN	PC(42:2)		0.0677814	0.0463417	0.0356083	0.0409841	0.0386801	0.0458791	0.0128569	0.0292352	0.0254911	0.0280825	0.0581029	0.0139186	0.0309661	0.0163425	0.035958	0.0343657	0.0319273	0.0342133	0.0127278	0.0298384	0.0096724	0.0342513	0.0324305	0.0367302	0.0374177	0.0617433	0.0405146	0.0120328
878.6	C52H80O8PN	PC(44:12)		0	0	0.00890208	0.00819682	0.01934	0.00728779	0.007983	0	0	0.00468041	0	0.0069593	0.00232794	0.00328792	0.011986	0.00763682	0.00638545	0.00855333	0	0.00691232	0.00438798	0	0.0108102	0	0.00935444	0	0.00403292	0.00554623
880.6	C52H82O8PN	PC(44:11)		0	0.0185367	0	0.00819682	0	0.0053467	0.00818322	0.00584705	0	0.00468041	0	0	0.00210549	0.00291242	0.011986	0.00763682	0.00638545	0.0171067	0	0.00862298	0.00639565	0.00978609	0	0	0.00935444	0.00686036	0.00520018	0.00487669
882.6	C52H84O8PN	PC(44:10)		0	0	0	0.00819682	0.00967002	0.00357337	0.00492068	0.00584705	0	0	0	0	0.00116941	0.00261488	0	0.00381841	0	0	0	0.000763682	0.00170765	0	0	0	0	0	0	0
884.6	C52H86O8PN	PC(44:9)		0.00968306	0.00926834	0	0.0245905	0	0.00870837	0.0100645	0	0	0	0.0166008	0.0069593	0.00471202	0.00729732	0	0.00763682	0	0.00427666	0.0127278	0.00492826	0.00541223	0	0.00540508	0.00524717	0.00935444	0	0.00400134	0.00400623
886.6	C52H88O8PN	PC(44:8)		0	0	0	0.00819682	0.00967002	0.00357337	0.00492068	0	0	0	0	0	0	0	0.00599299	0	0	0	0	0.0011986	0.00268015	0	0.00540508	0	0	0	0.00108102	0.00241722
888.6	C52H90O8PN	PC(44:7)		0.00968306	0	0	0.00819682	0	0.00357598	0.00492472	0	0	0	0	0	0	0	0	0	0	0	0	0	0	0	0	0	0	0	0	0
890.7	C52H92O8PN	PC(44:6)		0.0290492	0.00926834	0.00890208	0.00819682	0.00967002	0.0130173	0.00897847	0.0116941	0.0127456	0	0	0.0069593	0.00627979	0.00613299	0.00599299	0.00381841	0.00638545	0.00427666	0	0.0040947	0.00253609	0	0.00540508	0	0.00935444	0	0.0029519	0.00427644
892.7	C52H94O8PN	PC(44:5)		0.00968306	0.00926834	0	0.0245905	0.00967002	0.0106424	0.00882557	0	0	0.00936082	0	0	0.00187216	0.00418629	0	0	0	0	0	0	0	0	0	0	0	0	0	0
894.7	C52H96O8PN	PC(44:4)		0.00968306	0	0.00890208	0	0	0.00371703	0.00509723	0	0	0	0	0	0	0	0	0.00381841	0	0	0.0127278	0.00330924	0.00551864	0	0	0.00524717	0	0	0.00104943	0.00234661
896.7	C52H98O8PN	PC(44:3)		0.0290492	0.00926834	0.0267062	0.0163936	0.01934	0.0201515	0.00798993	0.00584705	0	0	0.00830041	0.0069593	0.00422135	0.00395024	0.00599299	0	0	0	0	0.0011986	0.00268015	0.00489304	0.00540508	0	0	0	0.00205962	0.00282606
898.7	C52H100O8PN	PC(44:2)		0.00968306	0	0	0.0163936	0	0.00521534	0.00752519	0.00584705	0	0	0.00830041	0.0069593	0.00422135	0.00395024	0.011986	0.0114552	0.0127709	0.00855333	0.0127278	0.0114986	0.00173521	0.00489304	0.0216203	0.0209887	0.00935444	0.0137207	0.0141154	0.00727049
Total PC				74.6564	70.6803	77.0831	75.9517	75.6679	74.8079	2.46395	72.6145	74.9821	71.5963	77.7167	74.6177	74.3055	2.36597	57.8204	54.1107	56.7475	54.1939	52.9349	55.1615	2.03614	59.4016	57.0992	56.4281	54.6673	59.4519	57.4096	2.04442
701.5	C39H77N2O6P	SM(16:1)		0	0.0478984	0.0690084	0.0423608	0.0249871	0.0368509	0.0259097	0.045326	0.0329343	0.0604704	0.0428962	0.0359654	0.0435184	0.0107249	0.201315	0.266401	0.329998	0.309423	0.164442	0.254316	0.0703509	0.240227	0.279332	0.338965	0.193373	0.248178	0.260015	0.0538028
703.6	C39H79N2O6P	SM(16:0)		1.17598	1.413	1.49518	1.41909	1.39928	1.38051	0.12029	1.97923	1.21857	1.6448	1.97322	1.40265	1.64369	0.339121	2.88035	4.21308	4.88397	4.44243	2.49951	3.78387	1.0361	3.85627	4.32965	4.67771	3.26318	3.40359	3.90608	0.600651
705.6	C39H81N2O6P	DSM(16:0)		0	0	0	0	0	0	0	0.045326	0	0	0	0	0.00906519	0.0202704	0	0.296001	0.148499	0.309423	0.131553	0.177095	0.128359	0	0	0	0.0241717	0	0.00483433	0.0108099
729.6	C41H81N2O6P	SM(18:1)		0.0500416	0.0478984	0	0.0423608	0.0499743	0.038055	0.0215021	0	0.0329343	0	0	0	0.00658685	0.0147286	0.0464573	0.148	0.0989993	0.121559	0.0986651	0.102736	0.0374199	0	0	0.149144	0	0.0354541	0.0369197	0.0645866
731.6	C41H83N2O6P	SM(18:0)		0	0	0	0	0	0	0	0	0	0	0	0	0	0	0	0	0	0	0	0	0	0	0	0	0	0	0	0
733.6	C41H85N2O6P	DSM(18:0)		0	0	0	0	0	0	0	0	0	0	0	0	0	0	0	0	0	0	0	0	0	0	0	0	0	0	0	0
785.6	C45H89N2O6P	SM(22:1)		0	0	0	0	0	0	0	0	0	0	0	0	0	0	0	0	0	0	0	0	0	0	0	0	0	0	0	0
787.7	C45H91N2O6P	SM(22:0)		0	0	0	0	0	0	0	0	0	0	0	0	0	0	0	0	0	0	0	0	0	0	0	0	0	0	0	0
789.7	C45H93N2O6P	DSM(22:0)		0.250208	0.957968	0.529064	0.635412	0.474756	0.569482	0.258752	0.151087	0.0658685	0	0.235929	0.341671	0.158911	0.135373	0	0	0	0	0	0	0	0	0.502798	0	0	0	0.10056	0.224858
813.7	C47H93N2O6P	SM(24:1)		1.02585	0.694527	0.805097	1.14374	0.774601	0.888764	0.188128	0.966954	0.494014	0.894962	0.857924	0.557464	0.754263	0.213447	0.449087	0.907736	1.03949	0.884065	0.624879	0.781052	0.238769	0.68275	0.78213	0.840632	0.773493	0.638173	0.743436	0.081564
815.7	C47H95N2O6P	SM(24:0)		0	0	0	0	0	0	0	0	0.0329343	0.0604704	0	0	0.0186809	0.0273699	0.123886	0.256534	0.0989993	0.375728	0.131553	0.19734	0.116962	0.290801	0.363132	0.257613	0.0966867	0	0.201647	0.149027
817.7	C47H97N2O6P	DSM(24:0)		0.125104	0.0957968	0.0690084	0.0847217	0.0249871	0.0799236	0.0369236	0.166195	0.0329343	0.0241882	0.10724	0.0719308	0.0804978	0.0582359	0.0154858	0.0098667	0	0.0994573	0	0.0249619	0.0421705	0	0.0837996	0.0949101	0	0	0.0357419	0.0490991
Total SM and DSM				2.62719	3.25709	2.96736	3.36769	2.74859	2.99358	0.317942	3.35412	1.91019	2.68489	3.21721	2.40968	2.71522	0.592145	3.71658	6.09762	6.59995	6.54208	3.65061	5.32137	1.50783	5.07005	6.34084	6.35898	4.3509	4.3254	5.28923	1.01337
714.5	C40H76O7PN	ePC(32:3)		0.0580983	0.0741467	0.0801187	0.0327873	0.0483501	0.0587002	0.0192114	0.0350823	0.0509822	0.079567	0.0581029	0.0208779	0.0489225	0.0223923	0.011986	0.0152736	0.0255418	0.0299366	0.0127278	0.0190932	0.00813611	0.0244652	0.0270254	0.0157415	0.00935444	0.0137207	0.0180615	0.0074397
716.6	C40H78O7PN	ePC(32:2)		0.0774645	0.0648784	0.0534125	0.0655746	0.0483501	0.061936	0.0114046	0.0818587	0.0637278	0.0842474	0.0830041	0.10439	0.0834455	0.0144118	0.17979	0.198557	0.127709	0.201003	0.305467	0.202505	0.0646711	0.156577	0.135127	0.183651	0.065481	0.157788	0.139725	0.0449252
718.6	C40H80O7PN	ePC(32:1)		1.21038	1.19562	1.13056	1.09018	1.07337	1.14002	0.0613541	1.08755	1.15985	1.0999	1.22016	1.12741	1.13897	0.0532259	2.42117	2.4476	2.40093	2.45908	2.50738	2.44723	0.0405611	2.47588	2.35661	2.45043	2.18894	2.3531	2.36499	0.112697
720.6	C40H82O7PN	ePC(32:0)		0.716546	0.695125	0.747774	0.655746	0.763932	0.715825	0.0429347	0.45607	0.395112	0.416557	0.448222	0.347965	0.412785	0.0437537	1.7979	1.66101	1.85817	1.86035	1.65461	1.76641	0.102278	2.65203	2.56201	2.53438	2.4228	2.53147	2.54054	0.0819663
740.6	C42H78O7PN	ePC(34:4)		0	0	0.00890208	0.00819682	0.00967002	0.00535378	0.00491501	0.00584705	0.0127456	0	0.00830041	0.0069593	0.00677046	0.00460353	0.00599299	0.00381841	0.0127709	0.01283	0	0.00708246	0.00564346	0.00489304	0.00540508	0	0	0.00686036	0.0034317	0.00321475
742.6	C42H80O7PN	ePC(34:3)		0.0387322	0.05561	0.0623145	0.0409841	0.0386801	0.0472642	0.0109782	0.0409293	0.0509822	0.0468041	0.0664033	0.0556744	0.0521587	0.00963616	0.11986	0.126008	0.0957818	0.124023	0.152734	0.123681	0.0202642	0.0929678	0.0756711	0.0839547	0.0561266	0.0960451	0.0809531	0.0160108
744.6	C42H82O7PN	ePC(34:2)		0.706863	0.806345	0.827893	0.786895	0.705912	0.766782	0.0570084	0.765963	0.790225	0.739505	0.755337	0.849035	0.780013	0.0427653	1.39637	1.42427	1.18769	1.42841	1.8328	1.45391	0.234132	1.17922	1.07021	1.19636	0.851254	1.228	1.10501	0.153772
746.6	C42H84O7PN	ePC(34:1)		5.16107	5.08832	5.43027	4.97547	4.87369	5.10576	0.211837	4.23911	3.87465	4.00643	4.27471	3.70931	4.02084	0.240168	8.19242	8.35087	8.32025	8.50628	8.00578	8.27512	0.187478	8.83684	8.44813	8.45844	7.81095	8.94591	8.50006	0.444831
748.6	C42H86O7PN	ePC(34:0)		0.261443	0.342928	0.391691	0.393447	0.377131	0.353328	0.0552245	0.105247	0.165692	0.201258	0.182609	0.208779	0.172717	0.0412749	0.964872	0.893508	0.976975	1.04351	0.86549	0.94887	0.0707443	1.22326	1.18371	1.2016	1.02899	1.17998	1.16351	0.0771311
766.6	C44H80O7PN	ePC(36:5)		0.0193661	0.00926834	0.0445104	0.0327873	0.0290101	0.0269884	0.0133869	0.0526234	0.0509822	0.0421237	0.0166008	0.0208779	0.0366416	0.0168912	0.11986	0.152736	0.114938	0.136853	0.152734	0.135424	0.0177714	0.107647	0.0810761	0.0734604	0.0748355	0.0891847	0.0852407	0.013982
768.6	C44H82O7PN	ePC(36:4)		0.0387322	0.0463417	0.0267062	0.0491809	0.0386801	0.0399282	0.00872574	0.0409293	0.0637278	0.0327629	0.0332016	0.0417558	0.0424755	0.0125987	0.281671	0.343657	0.306502	0.350686	0.356378	0.327779	0.0323012	0.264224	0.205393	0.209887	0.224506	0.226392	0.226081	0.0231719
770.6	C44H84O7PN	ePC(36:3)		0.309858	0.296587	0.293769	0.33607	0.251421	0.297541	0.0307343	0.374211	0.293148	0.299546	0.315416	0.354924	0.327449	0.0355019	0.52139	0.580399	0.529993	0.56452	0.623662	0.563993	0.0412335	0.479518	0.37295	0.440762	0.327405	0.439063	0.41194	0.0608267
772.6	C44H86O7PN	ePC(36:2)		2.10122	2.11318	2.06528	2.12298	2.13707	2.10795	0.0272362	1.82428	2.02654	1.93769	2.1166	1.99732	1.98049	0.108587	2.46911	2.59652	2.20298	2.42914	2.54556	2.44866	0.151994	2.02083	2.1296	1.94145	1.98314	2.14043	2.04309	0.0885709
774.6	C44H88O7PN	ePC(36:1)		1.40404	1.40879	1.34421	1.36067	1.3538	1.3743	0.0299377	0.900446	1.07063	0.931402	1.05415	0.960384	0.983402	0.0753813	2.86465	2.81035	2.99478	2.98083	2.82557	2.89524	0.0869339	2.87711	2.73497	2.7915	2.57247	2.73728	2.74267	0.111259
776.6	C44H90O7PN	ePC(36:0)		0.0968306	0.129757	0.0801187	0.0819682	0.0870302	0.0951409	0.0204088	0.0643175	0.0637278	0.11701	0.0747037	0.0069593	0.0653437	0.0392729	0.161811	0.152736	0.191564	0.171067	0.127278	0.160891	0.0236724	0.215294	0.178368	0.20464	0.159025	0.19209	0.189883	0.0220972
792.6	C46H82O7PN	ePC(38:6)		0.0580983	0.0741467	0.0890208	0.0573777	0.0580201	0.0673327	0.0140348	0.0526234	0.0509822	0.0655258	0.0581029	0.0556744	0.0565817	0.00570428	0.287664	0.297836	0.249033	0.248046	0.292739	0.275064	0.0244812	0.205508	0.151342	0.141674	0.159025	0.205811	0.172672	0.0307346
794.6	C46H84O7PN	ePC(38:5)		0.154929	0.148293	0.160237	0.147543	0.18373	0.158947	0.0147951	0.175411	0.191183	0.173175	0.157708	0.146145	0.168725	0.0173213	0.46146	0.511667	0.459753	0.444773	0.496384	0.474807	0.0279779	0.357192	0.324305	0.288594	0.289987	0.260694	0.304154	0.0372514
796.6	C46H86O7PN	ePC(38:4)		0.309858	0.268782	0.391691	0.319676	0.299771	0.317956	0.0454265	0.263117	0.22942	0.294866	0.273914	0.29925	0.272113	0.0281113	0.251706	0.309291	0.242647	0.20528	0.254556	0.252696	0.0372718	0.195722	0.162152	0.162662	0.177734	0.212671	0.182188	0.0218798
798.6	C46H88O7PN	ePC(38:3)		0.338907	0.33366	0.267062	0.295086	0.328781	0.312699	0.0307319	0.216341	0.305893	0.22934	0.307115	0.264454	0.264629	0.0420859	0.149825	0.148918	0.166022	0.162513	0.178189	0.161093	0.0121839	0.122326	0.118912	0.131179	0.121608	0.123487	0.123502	0.00460932
800.6	C46H90O7PN	ePC(38:2)		0.455104	0.407807	0.400593	0.401644	0.435151	0.42006	0.0241041	0.245576	0.331385	0.294866	0.323716	0.29925	0.298959	0.033656	0.377559	0.355112	0.427825	0.376346	0.356378	0.378644	0.0294736	0.40123	0.32971	0.330572	0.308696	0.336158	0.341273	0.0351085
802.7	C46H92O7PN	ePC(38:1)		0.164612	0.194635	0.115727	0.188527	0.12571	0.157842	0.0358722	0.128635	0.152947	0.121691	0.107905	0.090471	0.12033	0.0233485	0.317629	0.294018	0.306502	0.29509	0.34365	0.311378	0.0204392	0.318048	0.313494	0.31483	0.299342	0.301856	0.309514	0.00835241
804.7	C46H94O7PN	ePC(38:0)	PC(38:7)	0.0677814	0.083415	0.0623145	0.00819682	0.0580201	0.0559456	0.0283702	0.0175411	0.0127456	0	0.0166008	0.0139186	0.0121612	0.00707069	0.0898949	0.0801866	0.0830109	0.0684266	0.0890946	0.0821227	0.0086766	0.122326	0.118912	0.0787076	0.0841899	0.0960451	0.100036	0.0198436
820.6	C48H86O7PN	ePC(40:6)		0.12588	0.11122	0.169139	0.122952	0.16439	0.138716	0.0262395	0.134482	0.140201	0.177856	0.141107	0.0974303	0.138215	0.0285527	0.221741	0.202376	0.166022	0.213833	0.254556	0.211705	0.0320758	0.146791	0.135127	0.131179	0.130962	0.164649	0.141742	0.0143331
822.6	C48H88O7PN	ePC(40:5)		0.0968306	0.0463417	0.0445104	0.0491809	0.0483501	0.0570427	0.022316	0.0701646	0.0127456	0.0327629	0.0332016	0.0626337	0.0423017	0.023649	0.161811	0.194739	0.191564	0.175343	0.216372	0.187966	0.0206711	0.137005	0.124317	0.104943	0.121608	0.137207	0.125016	0.0132983
824.6	C48H90O7PN	ePC(40:4)		0.0774645	0.101952	0.0712166	0.0655746	0.0773602	0.0787135	0.0138946	0.0584705	0.0382367	0.0514845	0.0581029	0.0556744	0.0523938	0.00838948	0.0539369	0.0496394	0.0446982	0.0342133	0.0509112	0.0466798	0.00772447	0.0391444	0.0270254	0.0367302	0.0374177	0.0343018	0.0349239	0.0047452
826.7	C48H92O7PN	ePC(40:3)		0.0774645	0.0741467	0.0979228	0.0655746	0.0483501	0.0726917	0.0180601	0.0350823	0.0254911	0.0421237	0.0249012	0.0487151	0.0352627	0.0103793	0.035958	0.0343657	0.0383127	0.0342133	0.0381834	0.0362066	0.00198541	0.0391444	0.0216203	0.031483	0.0187089	0.0343018	0.0290517	0.00862462
828.7	C48H94O7PN	ePC(40:2)		0.0968306	0.120488	0.0979228	0.0409841	0.0676902	0.0847832	0.030835	0.0467764	0.0382367	0.0374433	0.0581029	0.0487151	0.0458549	0.00848286	0.0659229	0.0725498	0.07024	0.0769799	0.0890946	0.0749574	0.00885469	0.0782887	0.0810761	0.0787076	0.0748355	0.0823243	0.0790464	0.00288468
Total ePC				14.2244	14.2918	14.5549	13.7952	13.7314	14.1196	0.348565	11.5187	11.6622	11.5559	12.268	11.295	11.66	0.365287	23.984	24.308	23.7922	24.6336	24.6283	24.2692	0.378188	24.7735	23.4742	23.6175	21.5994	24.3268	23.5583	1.21606
452.3	C21H42O7PN	LPE(16:1)		1.68485	0.33366	0	0.0245905	0.0290101	0.414422	0.723321	0.0935528	0.0764733	0.191897	0.0166008	0.0347965	0.0826641	0.068455	0.0839019	0.0572762	0.07024	0.0684266	0.0381834	0.0636056	0.0170701	0.0831817	0.0594558	0.0944491	0.0841899	0.0548829	0.0752319	0.0171443
454.3	C21H44O7PN	LPE(16:0)		0	0.0463417	0.0267062	0	0.0773602	0.0300816	0.0328666	0.111094	0.152947	0.0936082	0	0.0347965	0.0784891	0.0610434	0.029965	0.0343657	0.0766255	0.0470433	0.101822	0.0579644	0.0305446	0.0244652	0.0432406	0.0209887	0.0467722	0.075464	0.0421861	0.0217539
476.3	C23H42O7PN	LPE(18:3)		0.193661	0.27805	0.0267062	0.00819682	0	0.101323	0.126753	0.204647	0.0254911	0.280825	0	0.0208779	0.106368	0.127728	0.017979	0	0.0127709	0.0171067	0.0381834	0.017208	0.0137511	0.0440374	0.0108102	0.0104943	0.00935444	0.0411622	0.0231717	0.0177727
478.3	C23H44O7PN	LPE(18:2)		0.00968306	0.139025	0	0	0.01934	0.0336096	0.0594721	0.111094	0.0382367	0.0468041	0.00830041	0.0069593	0.0422789	0.0423507	0.0419509	0.0305473	0.0446982	0.0470433	0.0254556	0.0379391	0.00942262	0.0146791	0.0378355	0.0419774	0.0748355	0.0274414	0.0393538	0.022466
480.3	C23H46O7PN	LPE(18:1)		0.183978	0.593174	0.169139	0.18033	0.473831	0.32009	0.199409	0.391752	0.446095	0.744185	0.332016	0.39668	0.462146	0.162772	0.473446	0.420025	0.478909	0.46188	0.432745	0.453401	0.0258117	0.264224	0.491862	0.425021	0.813836	0.37732	0.474453	0.207098
500.3	C25H42O7PN	LPE(20:5)		0.00968306	0.0463417	0	0.00819682	0	0.0128443	0.0192589	0.0233882	0	0.00936082	0.00830041	0	0.00820989	0.00957234	0.0539369	0.0152736	0.0255418	0.02566	0.0254556	0.0291736	0.0145412	0.00978609	0.0324305	0.0209887	0.065481	0.0343018	0.0325976	0.020853
502.3	C25H44O7PN	LPE(20:4)		0.0484153	0.148293	0	0.0163936	0	0.0426205	0.0622921	0.105247	0.0127456	0.0608453	0	0	0.0357676	0.0462194	0.143832	0.152736	0.159636	0.136853	0.11455	0.141522	0.0173818	0.0880748	0.156747	0.146921	0.308696	0.109766	0.162041	0.0865565
504.3	C25H46O7PN	LPE(20:3)		0	0.083415	0.0356083	0.0327873	0.13538	0.0574382	0.0527568	0.0292352	0.101964	0.154454	0.0581029	0.090471	0.0868454	0.0473225	0.0539369	0.0420025	0.0319273	0.0299366	0	0.0315607	0.0200535	0.0293583	0.0270254	0.0262359	0.0841899	0.0274414	0.0388502	0.0253717
506.3	C25H48O7PN	LPE(20:2)		0.0677814	0.732199	0.0267062	0.0409841	0.11604	0.196742	0.30126	0.245576	0.178438	0.397835	0.0747037	0.0835116	0.196013	0.133107	0.023972	0.0229105	0.0191564	0.02566	0.0254556	0.0234309	0.00264118	0.0195722	0.0324305	0.0262359	0.0280633	0.0205811	0.0253766	0.00534794
508.3	C25H50O7PN	LPE(20:1)		0.0580983	0.342928	0.0267062	0.0409841	0.0967002	0.113083	0.13113	0.181259	0.178438	0.196577	0.0996049	0.132227	0.157621	0.0403745	0.203762	0.183284	0.197949	0.20528	0.165461	0.191147	0.0167833	0.132112	0.172962	0.188898	0.355469	0.144068	0.198702	0.0904897
510.3	C25H52O7PN	LPE(20:0)		0.0387322	0.0370734	0	0	0	0.0151611	0.0207685	0.0409293	0	0	0.00830041	0	0.00984595	0.017744	0	0	0.00638545	0.00427666	0	0.00213242	0.00301362	0	0	0	0	0.0137207	0.00274414	0.00613609
526.3	C27H44O7PN	LPE(22:6)		0.271126	0.324392	0.0623145	0.0409841	0	0.139763	0.147168	0.175411	0.0509822	0.248062	0	0.0278372	0.100459	0.106323	0.215748	0.183284	0.178793	0.17962	0.178189	0.187127	0.0161216	0.137005	0.172962	0.157415	0.430304	0.219532	0.223444	0.119568
528.3	C27H46O7PN	LPE(22:5)		0	0	0.00890208	0.00819682	0	0.00341978	0.00468936	0.0409293	0	0.0374433	0	0	0.0156745	0.0214986	0.155818	0.164192	0.14048	0.158237	0.11455	0.146655	0.0199655	0.0831817	0.135127	0.120685	0.364823	0.0823243	0.157228	0.118335
Total LysoPE				2.56601	3.10489	0.382789	0.401644	0.947662	1.4806	1.27179	1.75411	1.26181	2.4619	0.60593	0.828157	1.38238	0.746344	1.49825	1.3059	1.44311	1.40702	1.26005	1.38287	0.0981502	0.929678	1.37289	1.28031	2.66601	1.228	1.49538	0.675121
634.4	C33H64O8PN	PE(28:1)		0.00968306	0.00926834	0.00890208	0.00819682	0.00967002	0.00914406	0.000620165	0.0116941	0.0127456	0.00468041	0	0.0069593	0.00721587	0.00522482	0	0.00381841	0	0	0	0.000763682	0.00170765	0.00489304	0	0.00524717	0	0.00686036	0.00340012	0.00319121
636.5	C33H66O8PN	PE(28:0)		0.0290492	0.027805	0.00890208	0.00819682	0.01934	0.0186586	0.00995896	0.0175411	0	0.0140412	0.00830041	0.0069593	0.00936842	0.00677016	0.00599299	0.00763682	0.00638545	0.00427666	0	0.00485839	0.0029699	0.00489304	0.00540508	0.00524717	0	0	0.00310906	0.00284422
662.5	C35H68O8PN	PE(30:1)		0	0	0	0	0.00967002	0.001934	0.00432457	0	0	0	0	0.0069593	0.00139186	0.0031123	0	0	0	0.00427666	0	0.000855333	0.00191258	0.00489304	0	0	0	0	0.000978609	0.00218824
664.5	C35H70O8PN	PE(30:0)		0	0	0	0.00819682	0	0.00163936	0.00366573	0.0116941	0	0	0	0.0069593	0.00373068	0.00537573	0.00599299	0.0114552	0.00638545	0.00427666	0.0127278	0.00816763	0.00369622	0.00489304	0.0108102	0.0104943	0.00935444	0.00686036	0.00848247	0.00253679
688.5	C37H70O8PN	PE(32:2)		0.00968306	0	0	0.00819682	0	0.00357598	0.00492472	0.0350823	0.0127456	0.00936082	0.0166008	0.0208779	0.0189335	0.00999916	0.00599299	0.00763682	0.0127709	0.00427666	0	0.00613548	0.00467447	0.00489304	0.0108102	0.0104943	0.00935444	0	0.00711039	0.00462735
690.5	C37H72O8PN	PE(32:1)		0.0290492	0.101952	0.0445104	0.0737714	0.0483501	0.0595266	0.0286447	0.1988	0.127456	0.149773	0.124506	0.173983	0.154903	0.0316014	0.161811	0.175647	0.146865	0.16679	0.190917	0.168406	0.0163499	0.127219	0.156747	0.157415	0.271279	0.144068	0.171346	0.0571949
692.5	C37H74O8PN	PE(32:0)		0.0193661	0	0.0178042	0.0163936	0.00967002	0.0126468	0.00797792	0.0233882	0.0254911	0.0421237	0.0166008	0.0139186	0.0243045	0.0110339	0.023972	0.0267289	0.0127709	0.0171067	0.0254556	0.0212068	0.00600348	0.00489304	0.0216203	0.0157415	0.0280633	0.0137207	0.0168078	0.0086959
712.5	C39H70O8PN	PE(34:4)		0	0	0	0	0	0	0	0	0	0.00468041	0	0	0.000936082	0.00209314	0	0	0	0	0	0	0	0	0	0	0	0	0	0
714.5	C39H72O8PN	PE(34:3)		0	0.00926834	0	0	0	0.00185367	0.00414493	0.0116941	0	0.0140412	0	0	0.00514707	0.0070966	0.011986	0.00763682	0.00638545	0.00427666	0.0127278	0.00860254	0.00364097	0.00489304	0.00540508	0.00524717	0.00935444	0	0.00497995	0.00332399
716.5	C39H74O8PN	PE(34:2)		0.154929	0.240977	0.133531	0.254101	0.17406	0.19152	0.0533124	0.526234	0.305893	0.556969	0.273914	0.417558	0.416114	0.126825	0.215748	0.297836	0.21072	0.24377	0.381834	0.269981	0.0714617	0.16147	0.237823	0.230876	0.308696	0.19895	0.227563	0.0545109
718.5	C39H76O8PN	PE(34:1)		0.338907	0.593174	0.47181	0.5164	0.425481	0.469154	0.095514	0.947222	0.841207	1.06713	0.730436	1.02302	0.921803	0.137048	1.43233	1.80993	1.41757	1.50539	2.0619	1.64542	0.281716	1.07647	1.51883	1.74731	2.45086	1.33091	1.62488	0.523368
720.5	C39H78O8PN	PE(34:0)		0	0	0	0.0163936	0.01934	0.00714674	0.00984136	0	0.0127456	0.0608453	0.00830041	0.0139186	0.019162	0.0239339	0.00599299	0	0	0	0	0.0011986	0.00268015	0.00978609	0	0	0	0	0.00195722	0.00437647
736.5	C41H70O8PN	PE(36:6)		0	0	0	0	0	0	0	0	0	0.00468041	0	0	0.000936082	0.00209314	0.00599299	0.00763682	0	0.00427666	0.0127278	0.00612685	0.00465918	0.00489304	0.00540508	0.00524717	0.00935444	0	0.00497995	0.00332399
738.5	C41H72O8PN	PE(36:5)		0	0	0	0	0	0	0	0	0	0.00468041	0	0	0.000936082	0.00209314	0.029965	0.0305473	0.0319273	0.02566	0.0381834	0.0312566	0.00452558	0.0146791	0.0162152	0.0262359	0.0374177	0.0137207	0.0216537	0.0101323
740.5	C41H74O8PN	PE(36:4)		0.0193661	0.027805	0.0178042	0.0245905	0.01934	0.0217812	0.00423636	0.0701646	0.0254911	0.0468041	0.0166008	0.0417558	0.0401633	0.0207194	0.113867	0.152736	0.108553	0.111193	0.165461	0.130362	0.0266822	0.0929678	0.102696	0.115438	0.187089	0.109766	0.121591	0.0375631
742.5	C41H76O8PN	PE(36:3)		0.12588	0.194635	0.0890208	0.139346	0.16439	0.142654	0.0398226	0.304047	0.22942	0.407196	0.190909	0.278372	0.281989	0.0825157	0.11986	0.129826	0.102167	0.106917	0.178189	0.127392	0.0304078	0.0831817	0.0972914	0.0944491	0.149671	0.0960451	0.104128	0.0260704
744.5	C41H78O8PN	PE(36:2)		0.668131	1.38098	0.632047	0.942634	0.831622	0.891083	0.301248	1.50854	1.1471	1.76452	1.12056	1.62848	1.43384	0.288607	1.13268	1.41663	1.02167	1.22313	1.76916	1.31265	0.293381	0.709491	1.09183	1.05468	1.55284	0.912428	1.06425	0.311638
746.6	C41H80O8PN	PE(36:1)		0.174295	0.463417	0.302671	0.418038	0.348121	0.341308	0.112061	0.573011	0.497077	0.68802	0.431621	0.640256	0.565997	0.103995	1.14466	1.39372	1.0089	1.14615	1.6928	1.27725	0.270658	0.792673	1.07021	1.17012	1.60896	0.95359	1.11911	0.307777
748.6	C41H82O8PN	PE(36:0)	ePE(38:7)	0	0	0	0	0	0	0	0	0	0.00468041	0	0	0.000936082	0.00209314	0	0.00763682	0	0.00855333	0	0.00323803	0.00444568	0	0	0	0	0	0	0
764.5	C43H74O8PN	PE(38:6)		0	0	0	0.0163936	0.00967002	0.00521273	0.00752326	0	0	0.00468041	0.00830041	0	0.00259616	0.00377832	0.11986	0.1451	0.127709	0.10264	0.165461	0.132154	0.0240777	0.0831817	0.0972914	0.104943	0.149671	0.0823243	0.103482	0.0275392
766.5	C43H76O8PN	PE(38:5)		0.00968306	0.0463417	0.0178042	0.0573777	0.0290101	0.0320433	0.0197371	0.0467764	0.0382367	0.0655258	0.0166008	0.0347965	0.0403872	0.0178497	0.305643	0.362749	0.236262	0.29509	0.420017	0.323952	0.0699849	0.190829	0.254039	0.24137	0.411595	0.233252	0.266217	0.0846619
768.5	C43H78O8PN	PE(38:4)		0.164612	0.44488	0.204748	0.319676	0.222411	0.271265	0.112552	0.420988	0.293148	0.444639	0.273914	0.417558	0.370049	0.0799552	0.52139	0.64913	0.472524	0.483263	0.776395	0.58054	0.130089	0.332727	0.432406	0.414527	0.720292	0.37732	0.455454	0.152899
770.6	C43H80O8PN	PE(38:3)		0.271126	0.66732	0.25816	0.434431	0.338451	0.393898	0.168059	0.496999	0.446095	0.67866	0.448222	0.605459	0.535087	0.103055	0.0599299	0.0916419	0.0574691	0.0598733	0.101822	0.0741473	0.0209524	0.0538235	0.0648609	0.0734604	0.0935444	0.0548829	0.0681144	0.0163183
772.6	C43H82O8PN	PE(38:2)		0.116197	0.0185367	0.0712166	0.106559	0.0870302	0.0799078	0.0384702	0.163717	0.127456	0.196577	0.116206	0.146145	0.15002	0.0317126	0.107874	0.133644	0.0830109	0.10264	0.178189	0.121072	0.0366845	0.0636096	0.0918863	0.104943	0.121608	0.075464	0.0915022	0.0230346
774.6	C43H84O8PN	PE(38:1)		0.00968306	0	0	0.0163936	0.0290101	0.0110174	0.0122187	0.0175411	0	0	0.0166008	0.0278372	0.0123958	0.012144	0.035958	0.0458209	0.0383127	0.0299366	0.063639	0.0427334	0.0129979	0.0146791	0.0270254	0.031483	0.0374177	0	0.0221211	0.0149199
776.6	C43H86O8PN	PE(38:0)	ePE(40:7)	0	0	0	0	0	0	0	0	0	0.00936082	0	0	0.00187216	0.00418629	0.023972	0.0420025	0.0255418	0.0299366	0.0509112	0.0344728	0.0115923	0.00978609	0.0162152	0.0157415	0.00935444	0.0137207	0.0129636	0.00323982
788.5	C45H74O8PN	PE(40:8)		0.00968306	0.0185367	0	0	0	0.00564395	0.00833815	0.0116941	0	0	0	0.0069593	0.00373068	0.00537573	0.00599299	0.00763682	0	0.00855333	0	0.00443663	0.00415265	0.00489304	0.00540508	0.00524717	0	0.00686036	0.00448113	0.00261493
790.5	C45H76O8PN	PE(40:7)		0.00968306	0.00926834	0.00890208	0.0245905	0.00967002	0.0124228	0.00680959	0	0	0.00468041	0.00830041	0	0.00259616	0.00377832	0.11986	0.1451	0.127709	0.11547	0.241828	0.149993	0.0525691	0.0782887	0.118912	0.120685	0.187089	0.102905	0.121576	0.04038
792.5	C45H78O8PN	PE(40:6)		0	0.00926834	0	0.00819682	0.00967002	0.00542704	0.00498336	0.00584705	0	0	0	0.0139186	0.00395313	0.00611922	0.281671	0.332202	0.249033	0.2566	0.420017	0.307904	0.0706149	0.185936	0.254039	0.262359	0.430304	0.212671	0.269062	0.0953409
794.6	C45H80O8PN	PE(40:5)		0.0580983	0.0648784	0.0267062	0.0491809	0	0.0397728	0.0264917	0.0584705	0	0	0.0166008	0.0139186	0.017798	0.0240014	0.167804	0.160373	0.127709	0.119747	0.203645	0.155855	0.0337011	0.0929678	0.135127	0.141674	0.205798	0.123487	0.13981	0.0413534
796.6	C45H82O8PN	PE(40:4)		0.0193661	0.0370734	0.0267062	0.0573777	0.0483501	0.0377747	0.0154758	0.0292352	0.0509822	0.0748866	0.0415021	0.0556744	0.0504561	0.0169916	0.029965	0.0496394	0.0319273	0.0342133	0.0763668	0.0444223	0.0194745	0.0342513	0.0216203	0.031483	0.0467722	0.0137207	0.0295695	0.0126084
798.6	C45H84O8PN	PE(40:3)		0.0193661	0.0741467	0.0445104	0.0491809	0.0386801	0.0451768	0.0197745	0.0116941	0.0382367	0.0936082	0.0415021	0.0487151	0.0467512	0.0297005	0.011986	0.0114552	0.00638545	0.00855333	0.0127278	0.0102216	0.00266529	0	0.00540508	0.0104943	0.00935444	0.00686036	0.00642284	0.00411253
800.6	C45H86O8PN	PE(40:2)		0	0.0185367	0	0.0491809	0.00967002	0.0154775	0.02036	0.0292352	0	0.0374433	0.0166008	0.069593	0.0305745	0.0259879	0.035958	0.0534578	0.0383127	0.0342133	0.0763668	0.0476617	0.0177681	0.0146791	0.0270254	0.0419774	0.0561266	0.0205811	0.0320779	0.0168579
812.5	C47H74O8PN	PE(42:10)		0.00968306	0	0	0	0	0.00193661	0.00433039	0.00584705	0	0.00936082	0	0.0069593	0.00443344	0.0042417	0	0.00381841	0	0	0.0127278	0.00330924	0.00551864	0	0	0	0.00935444	0.00686036	0.00324296	0.00452731
814.5	C47H76O8PN	PE(42:9)		0	0	0	0	0.00967002	0.001934	0.00432457	0.00584705	0	0.0187216	0.00830041	0.0069593	0.00796568	0.00679625	0	0.00381841	0	0	0	0.000763682	0.00170765	0	0	0	0	0.00686036	0.00137207	0.00306805
816.5	C47H78O8PN	PE(42:8)		0.00968306	0	0	0	0	0.00193661	0.00433039	0	0	0	0	0	0	0	0.00599299	0.00381841	0.00638545	0	0	0.00323937	0.00311459	0	0	0	0.00935444	0.00686036	0.00324296	0.00452731
818.6	C47H80O8PN	PE(42:7)		0	0.00926834	0	0	0	0.00185367	0.00414493	0.0818587	0.0127456	0.0982886	0	0	0.0385786	0.0476509	0.011986	0.0152736	0.0127709	0.0299366	0.0254556	0.0190846	0.00811068	0.00978609	0.00540508	0.0157415	0.0187089	0.0137207	0.0126725	0.00519861
820.6	C47H82O8PN	PE(42:6)		0	0.00926834	0	0	0	0.00185367	0.00414493	0	0	0	0	0	0	0	0.011986	0.0190921	0.0191564	0.01283	0.0254556	0.017704	0.00549033	0.00489304	0.00540508	0.0104943	0.00935444	0.00686036	0.00740145	0.00244696
822.6	C47H84O8PN	PE(42:5)		0.00968306	0	0	0	0	0.00193661	0.00433039	0.0175411	0	0.00468041	0	0	0.00444431	0.00759669	0.023972	0.0267289	0.0127709	0.0213833	0.0254556	0.0220621	0.00556168	0.0146791	0.0108102	0.0209887	0.0280633	0.0205811	0.0190245	0.00660187
824.6	C47H86O8PN	PE(42:4)		0	0.0185367	0.00890208	0	0	0.00548775	0.00825043	0	0	0.0468041	0.00830041	0.0069593	0.0124128	0.0196059	0.017979	0.0114552	0.00638545	0.0171067	0	0.0105853	0.00754385	0.00978609	0.00540508	0.00524717	0	0.0137207	0.00683181	0.00518182
826.6	C47H88O8PN	PE(42:3)		0	0	0	0	0.00967002	0.001934	0.00432457	0.0350823	0	0	0	0.0069593	0.00840832	0.0152127	0	0	0	0	0	0	0	0	0	0.00524717	0	0	0.00104943	0.00234661
828.6	C47H90O8PN	PE(42:2)		0.00968306	0	0.00890208	0.00819682	0	0.00535639	0.00491787	0	0	0.0234021	0	0.0069593	0.00607227	0.0101455	0.00599299	0.00763682	0.0127709	0.00855333	0.0127278	0.00953637	0.00307317	0.00489304	0.00540508	0.00524717	0	0.00686036	0.00448113	0.00261493
836.5	C49H74O8PN	PE(44:12)		0	0	0	0	0	0	0	0	0	0	0	0	0	0	0	0	0	0	0	0	0	0	0.00540508	0	0	0	0.00108102	0.00241722
838.5	C49H76O8PN	PE(44:11)		0	0.0185367	0	0	0	0.00370734	0.00828985	0	0	0	0	0	0	0	0	0	0	0	0	0	0	0	0	0	0	0	0	0
840.5	C49H78O8PN	PE(44:10)		0	0.0185367	0	0	0	0.00370734	0.00828985	0	0	0	0	0	0	0	0	0	0	0	0	0	0	0	0	0	0	0	0	0
842.6	C49H80O8PN	PE(44:9)		0	0	0	0	0	0	0	0	0	0.0140412	0	0	0.00280825	0.00627943	0	0	0	0	0	0	0	0	0	0	0	0	0	0
844.6	C49H82O8PN	PE(44:8)		0.00968306	0	0	0	0	0.00193661	0.00433039	0.00584705	0	0	0	0	0.00116941	0.00261488	0	0	0	0	0	0	0	0	0	0	0	0	0	0
846.6	C49H84O8PN	PE(44:7)		0	0.0185367	0	0	0	0.00370734	0.00828985	0.0175411	0	0	0	0	0.00350823	0.00784464	0.00599299	0.00381841	0	0	0.0127278	0.00450784	0.00526521	0	0	0	0	0	0	0
848.6	C49H86O8PN	PE(44:6)		0	0.00926834	0	0	0	0.00185367	0.00414493	0	0	0	0	0	0	0	0	0.00381841	0	0.00427666	0	0.00161901	0.00222284	0.00489304	0	0	0	0	0.000978609	0.00218824
850.6	C49H88O8PN	PE(44:5)		0	0	0	0	0	0	0	0.00584705	0	0.0140412	0	0	0.00397766	0.00616919	0.017979	0.00763682	0.0127709	0	0	0.00767734	0.00790495	0.00489304	0.00540508	0.0104943	0.00935444	0	0.00602938	0.0041541
852.6	C49H90O8PN	PE(44:4)		0	0	0	0	0	0	0	0	0	0.0234021	0	0	0.00468041	0.0104657	0.011986	0.0114552	0.0127709	0.00855333	0.0127278	0.0114986	0.00173521	0.00489304	0.00540508	0.0157415	0.0187089	0.0137207	0.0116938	0.00623502
854.7	C49H92O8PN	PE(44:3)		0	0.027805	0	0.00819682	0.00967002	0.00913437	0.0113648	0	0	0.00936082	0	0	0.00187216	0.00418629	0.00599299	0	0	0	0.0254556	0.00628972	0.0110238	0	0	0	0	0	0	0
856.7	C49H94O8PN	PE(44:2)		0.0193661	0	0	0	0	0.00387322	0.00866079	0	0	0	0	0	0	0	0	0	0	0	0	0	0	0	0	0	0	0	0	0
Total PE				2.33362	4.58783	2.40356	3.63939	2.93969	3.18082	0.94472	5.70672	4.24427	6.71639	3.9593	5.75534	5.2764	1.1498	6.36456	7.83538	5.81076	6.36367	9.48221	7.17132	1.49461	4.32545	5.95099	6.34383	9.21412	5.20701	6.20828	1.84846
659.5	C36H71O6PN2	PE-Cer(16:1)		0	0.0185367	0	0	0	0.00370734	0.00828985	0	0	0	0	0	0	0	0	0	0	0	0	0	0	0	0	0	0	0	0	0
661.5	C36H73O6PN2	PE-Cer(16:0)		0	0	0	0	0	0	0	0.00584705	0	0	0	0	0.00116941	0.00261488	0	0	0	0	0	0	0	0	0	0	0	0	0	0
687.5	C38H75O6PN2	PE-Cer(18:1)		0.00968306	0.0370734	0	0	0	0.00935128	0.0160543	0	0	0.00468041	0	0	0.000936082	0.00209314	0	0	0	0	0	0	0	0	0	0	0	0	0	0
689.5	C38H77O6PN2	PE-Cer(18:0)		0.0387322	0	0.00890208	0.00819682	0.00967002	0.0131002	0.0148497	0.00584705	0.0127456	0.0468041	0	0	0.0130793	0.0195698	0	0	0	0	0	0	0	0	0	0	0	0	0	0
773.6	C44H89O6PN2	PE-Cer(24:0)		0	0.083415	0.00890208	0.00819682	0	0.0201028	0.0356507	0	0.0127456	0.0608453	0	0.0278372	0.0202856	0.0254066	0	0	0.00638545	0.00427666	0	0.00213242	0.00301362	0.00489304	0	0	0	0	0.000978609	0.00218824
Total PE-Cer				0.0484153	0.139025	0.0178042	0.0163936	0.00967002	0.0462616	0.0539689	0.0116941	0.0254911	0.11233	0	0.0278372	0.0354705	0.0444092	0	0	0.00638545	0.00427666	0	0.00213242	0.00301362	0.00489304	0	0	0	0	0.000978609	0.00218824
672.5	C37H70O7PN	ePE(32:3)		0	0	0	0	0	0	0	0	0	0.00936082	0	0	0.00187216	0.00418629	0	0	0	0	0	0	0	0	0	0	0	0	0	0
674.5	C37H72O7PN	ePE(32:2)		0	0.00926834	0	0	0	0.00185367	0.00414493	0.00584705	0	0.00468041	0	0	0.00210549	0.00291242	0	0	0	0.00427666	0.0254556	0.00594645	0.011062	0	0	0	0	0	0	0
676.5	C37H74O7PN	ePE(32:1)		0	0	0	0	0	0	0	0	0	0	0	0.0069593	0.00139186	0.0031123	0.00599299	0.00763682	0	0.01283	0.0127278	0.00783752	0.00533172	0.00489304	0.00540508	0.00524717	0.00935444	0	0.00497995	0.00332399
678.5	C37H76O7PN	ePE(32:0)		0	0	0	0	0	0	0	0.0116941	0	0.00468041	0	0	0.0032749	0.00512429	0.011986	0.0114552	0	0.00855333	0	0.00639891	0.00598572	0.00489304	0	0.0104943	0.00935444	0.00686036	0.00632044	0.00415041
698.5	C39H72O7PN	ePE(34:4)		0	0.00926834	0	0	0	0.00185367	0.00414493	0.00584705	0	0.00468041	0	0	0.00210549	0.00291242	0	0	0	0	0	0	0	0	0	0	0	0	0	0
700.5	C39H74O7PN	ePE(34:3)		0	0	0	0	0	0	0	0	0	0	0	0.0069593	0.00139186	0.0031123	0.00599299	0	0.00638545	0.00427666	0.0127278	0.00587658	0.0045909	0.00978609	0.00540508	0.0104943	0.0187089	0.00686036	0.0102509	0.00516697
702.5	C39H76O7PN	ePE(34:2)		0.0290492	0.027805	0.0178042	0.0327873	0	0.0214891	0.0132293	0.0350823	0.0254911	0.0140412	0.00830041	0.0417558	0.0249342	0.0139786	0.035958	0.0458209	0.0255418	0.0299366	0.0890946	0.0452704	0.0256511	0.0195722	0.0270254	0.0262359	0.0187089	0.0205811	0.0224247	0.00390623
704.6	C39H78O7PN	ePE(34:1)		0.0290492	0.0463417	0.00890208	0.0573777	0.0290101	0.0341361	0.0185611	0.0526234	0.0764733	0.0889278	0.0415021	0.0626337	0.0644321	0.0187983	0.11986	0.126008	0.0957818	0.1283	0.178189	0.129628	0.0300584	0.0538235	0.0810761	0.0944491	0.121608	0.0823243	0.0866561	0.024547
706.6	C39H80O7PN	ePE(34:0)		0	0.00926834	0	0	0	0.00185367	0.00414493	0	0	0	0	0.0139186	0.00278372	0.00622459	0.017979	0.0114552	0	0.01283	0.0127278	0.0109984	0.00663791	0.00978609	0	0.0157415	0	0.0137207	0.00784967	0.00747888
724.5	C41H74O7PN	ePE(36:5)		0	0.00926834	0	0	0	0.00185367	0.00414493	0	0	0	0	0	0	0	0.023972	0.0305473	0.0191564	0.02566	0.0381834	0.0275038	0.00722616	0.00978609	0.00540508	0.0209887	0.00935444	0.0137207	0.011851	0.00589576
726.5	C41H76O7PN	ePE(36:4)		0	0.0370734	0	0	0	0.00741467	0.0165797	0	0	0.0421237	0	0.0139186	0.0112085	0.0183029	0.011986	0.0305473	0.0191564	0.02566	0.0509112	0.0276522	0.0147558	0.00489304	0	0.0262359	0.0374177	0	0.0137093	0.0171218
728.6	C41H78O7PN	ePE(36:3)		0.0290492	0.0370734	0.0267062	0.0409841	0.01934	0.0306306	0.00857441	0.0409293	0.0637278	0.0280825	0.0498025	0.090471	0.0546026	0.023891	0.023972	0.0229105	0.0127709	0.0213833	0.063639	0.0289351	0.0198972	0.0146791	0.0162152	0.0104943	0.00935444	0.00686036	0.0115207	0.00385614
730.6	C41H80O7PN	ePE(36:2)		0.106514	0.176098	0.0534125	0.0655746	0.0676902	0.0938578	0.0501104	0.146176	0.0892189	0.205938	0.0747037	0.125267	0.128261	0.0518563	0.107874	0.118371	0.0766255	0.10264	0.178189	0.11674	0.0376339	0.0538235	0.0648609	0.0892019	0.0935444	0.0686036	0.0740069	0.0168287
732.6	C41H82O7PN	ePE(36:1)		0.0387322	0.0648784	0.0356083	0.0819682	0.0580201	0.0558414	0.0191776	0.0526234	0.0637278	0.11233	0.0498025	0.090471	0.0737909	0.0268712	0.203762	0.229105	0.204335	0.226663	0.34365	0.241503	0.0583394	0.122326	0.135127	0.152168	0.25257	0.157788	0.163996	0.0514625
734.6	C41H84O7PN	ePE(36:0)		0	0.00926834	0	0	0	0.00185367	0.00414493	0	0	0	0	0	0	0	0.00599299	0	0	0	0	0.0011986	0.00268015	0	0	0	0	0	0	0
750.5	C43H76O7PN	ePE(38:6)		0	0	0	0	0	0	0	0.0116941	0	0	0	0	0.00233882	0.00522976	0.0839019	0.0916419	0.0638545	0.0769799	0.127278	0.0887312	0.0238463	0.0342513	0.0486457	0.0472245	0.0748355	0.0274414	0.0464797	0.0181747
752.6	C43H78O7PN	ePE(38:5)		0.00968306	0.0185367	0.00890208	0.0163936	0.00967002	0.0126371	0.00448322	0.0409293	0.0127456	0.0327629	0.0166008	0.0417558	0.0289589	0.013575	0.0719159	0.0916419	0.0638545	0.0855333	0.140006	0.0905903	0.0297157	0.0293583	0.0378355	0.0524717	0.0561266	0.0548829	0.046135	0.0119043
754.6	C43H80O7PN	ePE(38:4)		0.0290492	0.0185367	0.0178042	0.0327873	0.0290101	0.0254375	0.00681388	0.00584705	0.0382367	0.0702062	0.0249012	0.069593	0.0417568	0.0281524	0.0539369	0.064913	0.0383127	0.0470433	0.063639	0.053569	0.0112424	0.0244652	0.0324305	0.0262359	0.0467722	0.0205811	0.030097	0.0102553
756.6	C43H82O7PN	ePE(38:3)		0.0580983	0.083415	0.0534125	0.0655746	0.0483501	0.0617701	0.0136602	0.116941	0.0892189	0.126371	0.0498025	0.10439	0.0973446	0.0300103	0.023972	0.0229105	0.0127709	0.01283	0.0127278	0.0170422	0.00585361	0.0146791	0.0108102	0.0157415	0.0187089	0.0137207	0.0147321	0.00288275
758.6	C43H84O7PN	ePE(38:2)		0.0193661	0.083415	0.0356083	0.0491809	0.0290101	0.0433161	0.0248998	0.0701646	0.0509822	0.0889278	0.0415021	0.0417558	0.0586665	0.0205401	0.035958	0.0458209	0.0383127	0.0470433	0.0509112	0.0436092	0.00625695	0.00978609	0.0162152	0.0262359	0.0280633	0.0274414	0.0215484	0.00815382
760.6	C43H86O7PN	ePE(38:1)		0.0193661	0.027805	0.00890208	0.0163936	0.01934	0.0183614	0.00679154	0.0233882	0.0127456	0.0234021	0.0166008	0.0347965	0.0221866	0.00840038	0.0539369	0.0496394	0.0446982	0.05132	0.0890946	0.0577378	0.0178501	0.0195722	0.0216203	0.031483	0.0374177	0.0205811	0.0261349	0.00790887
762.6	C43H88O7PN	ePE(38:0)	PE(38:7)	0	0.0926834	0.00890208	0	0	0.0203171	0.0406372	0.00584705	0	0.00468041	0.00830041	0	0.00376557	0.00367741	0.011986	0.0114552	0.00638545	0.00855333	0.0254556	0.0127671	0.00744665	0	0.0108102	0.0104943	0.0187089	0.00686036	0.00937475	0.00679426
778.6	C45H80O7PN	ePE(40:6)		0	0.0185367	0	0.0163936	0.00967002	0.00892007	0.00877541	0.0233882	0.0127456	0.00936082	0	0.0069593	0.0104908	0.00859116	0.0539369	0.064913	0.0510836	0.0555966	0.0763668	0.0603794	0.0103313	0.0293583	0.0324305	0.0209887	0.0374177	0.0274414	0.0295273	0.00608224
780.6	C45H82O7PN	ePE(40:5)		0.00968306	0.0185367	0	0.00819682	0	0.00728331	0.00773506	0.00584705	0	0.00936082	0	0	0.00304157	0.00434618	0.0419509	0.0496394	0.0255418	0.0299366	0.063639	0.0421415	0.0153534	0.0146791	0.0270254	0.0262359	0.0280633	0.0205811	0.023317	0.00563243
782.6	C45H84O7PN	ePE(40:4)		0.0290492	0.0370734	0	0.0163936	0.01934	0.0203712	0.0140191	0.00584705	0	0	0.0166008	0.0347965	0.0114489	0.014707	0.011986	0.0190921	0.00638545	0.00855333	0.0254556	0.0142945	0.00788083	0	0.00540508	0.00524717	0.0187089	0.00686036	0.0072443	0.006918
784.6	C45H86O7PN	ePE(40:3)		0.0193661	0	0	0.00819682	0.00967002	0.00744659	0.00803873	0.00584705	0	0.00468041	0.0166008	0.0208779	0.00960124	0.00875571	0.00599299	0.00763682	0.00638545	0.00855333	0	0.00571372	0.00335177	0.00489304	0.0108102	0.0157415	0.0187089	0	0.0100307	0.00767369
786.6	C45H88O7PN	ePE(40:2)		0	0.00926834	0	0.00819682	0	0.00349303	0.00479801	0.0116941	0	0.0514845	0.00830041	0.0069593	0.0156877	0.0204586	0.00599299	0.0114552	0.0127709	0.00855333	0.0127278	0.0103001	0.00295531	0	0.00540508	0.00524717	0.0187089	0.0137207	0.00861637	0.00748029
Total ePE				0.426054	0.843419	0.275964	0.5164	0.348121	0.481992	0.22097	0.678258	0.535313	0.936082	0.423321	0.814239	0.677443	0.20639	1.03079	1.16462	0.830109	1.04351	1.6928	1.15236	0.325075	0.489304	0.599963	0.745098	0.982216	0.617433	0.686803	0.188432
848.5	C43H75O13P	PI(34:4)		0	0	0	0	0	0	0	0	0	0	0	0	0	0	0	0	0	0	0	0	0	0	0	0	0	0	0	0
850.5	C43H77O13P	PI(34:3)		0	0	0	0	0	0	0	0	0	0.00468041	0.00830041	0	0.00259616	0.00377832	0	0.00381841	0	0.00427666	0.0127278	0.00416457	0.00519972	0	0	0	0	0.00686036	0.00137207	0.00306805
852.5	C43H79O13P	PI(34:2)		0	0	0.0267062	0	0	0.00534125	0.0119434	0.0116941	0	0.00936082	0.00830041	0	0.00587107	0.00549833	0.0479439	0.0229105	0.0255418	0.0171067	0.0127278	0.0252461	0.0136354	0.0440374	0.0324305	0.031483	0.0561266	0.0480225	0.04242	0.0105034
854.5	C43H81O13P	PI(34:1)		0.00968306	0	0	0.0163936	0.0386801	0.0129514	0.0159685	0.00584705	0	0	0.0166008	0.0556744	0.0156245	0.0233923	0.323622	0.164192	0.14048	0.277983	0.356378	0.252531	0.0959755	0.195722	0.108102	0.188898	0.261924	0.137207	0.178371	0.0592141
872.5	C45H75O13P	PI(36:6)		0	0.00926834	0	0	0.01934	0.00572168	0.00860598	0	0	0	0.00830041	0	0.00166008	0.00371206	0.011986	0.0114552	0.0191564	0.00427666	0.0254556	0.014466	0.00809025	0.00489304	0.0216203	0.00524717	0.0187089	0	0.0100939	0.00948027
874.5	C45H77O13P	PI(36:5)		0	0	0	0	0	0	0	0	0	0	0	0	0	0	0	0	0	0	0	0	0	0.00489304	0	0	0	0	0.000978609	0.00218824
876.5	C45H79O13P	PI(36:4)		0	0.00926834	0	0	0	0.00185367	0.00414493	0.00584705	0	0	0	0.0069593	0.00256127	0.00352914	0.00599299	0.0114552	0	0.0213833	0.0127278	0.0103119	0.00797979	0.0195722	0.00540508	0.0104943	0.0187089	0	0.0108361	0.00844591
878.5	C45H81O13P	PI(36:3)		0.00968306	0	0.0267062	0	0	0.00727786	0.011642	0.0467764	0.11471	0.0468041	0	0.0626337	0.0541849	0.0411705	0.029965	0.0190921	0	0.0171067	0.0381834	0.0208694	0.0144512	0.0146791	0.00540508	0.0104943	0	0	0.00611571	0.00647714
880.6	C45H83O13P	PI(36:2)		0.0193661	0.00926834	0.0267062	0.0245905	0.01934	0.0198542	0.00674436	0.128635	0.127456	0.0327629	0	0.132227	0.0842161	0.0630228	0.191776	0.148918	0.07024	0.16679	0.394562	0.194457	0.120746	0.156577	0.0972914	0.152168	0.215152	0.123487	0.148935	0.0440688
882.6	C45H85O13P	PI(36:1)		0	0.0185367	0	0	0	0.00370734	0.00828985	0.0233882	0.0637278	0.0514845	0	0.0626337	0.0402468	0.0277616	0.719159	0.507849	0.274575	0.60301	0.75094	0.571106	0.19184	0.523556	0.297279	0.409279	0.430304	0.452784	0.42264	0.0822271
900.5	C47H79O13P	PI(38:6)		0.203344	0.16683	0.204748	0.196724	0.251421	0.204613	0.0303413	0.0116941	0.0382367	0.0561649	0.0747037	0.0208779	0.0403355	0.0256665	0.011986	0.0534578	0.0127709	0.02566	0.0509112	0.0309572	0.0201441	0.00489304	0.0108102	0.0157415	0.112253	0.0137207	0.0314837	0.0453363
902.5	C47H81O13P	PI(38:5)		0	0	0	0	0	0	0	0.0116941	0.0127456	0	0	0.0069593	0.00627979	0.00613299	0.0479439	0.0190921	0.00638545	0.0299366	0.0254556	0.0257627	0.0152438	0.0489304	0.0162152	0.0209887	0	0.0274414	0.0227152	0.017824
904.6	C47H83O13P	PI(38:4)		0.106514	0.0648784	0.0356083	0.0327873	0.0773602	0.0634296	0.0306813	0.222188	0.242166	0.107649	0.00830041	0.222698	0.1606	0.100376	0.275678	0.290199	0.0766255	0.265153	0.318195	0.24517	0.0963036	0.181043	0.102696	0.131179	0.140317	0.0686036	0.124768	0.0421049
906.6	C47H85O13P	PI(38:3)		0.242076	0.315123	0.169139	0.163936	0.251421	0.228339	0.0630581	0.649022	0.866698	0.510165	0.0415021	0.835116	0.580501	0.334253	0.113867	0.0992787	0.0383127	0.111193	0.178189	0.108168	0.0497578	0.0440374	0.0270254	0.0577189	0	0.0274414	0.0312446	0.0216393
908.6	C47H87O13P	PI(38:2)		0.0484153	0	0	0.0163936	0.0386801	0.0206978	0.0221751	0.0760116	0.127456	0.0514845	0	0.132227	0.0774357	0.0551721	0.0659229	0.0878235	0.0319273	0.0898099	0.140006	0.0830979	0.0394313	0.0440374	0.0432406	0.0524717	0.0374177	0.0548829	0.0464101	0.00716012
910.6	C47H89O13P	PI(38:1)		0	0	0	0	0.00967002	0.001934	0.00432457	0	0	0.00468041	0	0	0.000936082	0.00209314	0.0479439	0.0267289	0.00638545	0.0299366	0.0254556	0.0272901	0.014784	0.0244652	0.0108102	0.0157415	0.0374177	0	0.0176869	0.0141346
912.6	C47H91O13P	PI(38:0)		0.00968306	0.0185367	0	0.00819682	0.01934	0.0111513	0.00801304	0	0	0	0	0	0	0	0	0.00763682	0	0	0	0.00152736	0.00341529	0.00489304	0	0	0	0.0137207	0.00372275	0.00597716
924.5	C49H79O13P	PI(40:8)		0	0	0	0	0	0	0	0	0	0	0	0	0	0	0.00599299	0	0	0	0	0.0011986	0.00268015	0	0	0	0	0.00686036	0.00137207	0.00306805
926.5	C49H81O13P	PI(40:7)		0.00968306	0	0	0	0	0.00193661	0.00433039	0	0.0127456	0	0	0	0.00254911	0.00569999	0	0	0	0	0	0	0	0	0	0	0	0	0	0
928.6	C49H83O13P	PI(40:6)		0	0	0	0	0	0	0	0	0	0	0	0	0	0	0.023972	0.0114552	0.00638545	0.0171067	0.0381834	0.0194205	0.012364	0	0	0.00524717	0.00935444	0	0.00292032	0.00425432
930.6	C49H85O13P	PI(40:5)		0.0193661	0.027805	0.0356083	0.00819682	0.00967002	0.0201293	0.0117354	0.0116941	0	0.00468041	0	0.0069593	0.00466676	0.00495471	0.00599299	0.0152736	0.00638545	0.0171067	0.0127278	0.0114973	0.00509088	0.0195722	0.00540508	0.00524717	0.00935444	0.0205811	0.012032	0.00753426
932.6	C49H87O13P	PI(40:4)		0.00968306	0.0185367	0.0178042	0.0163936	0.01934	0.0163515	0.00388222	0.00584705	0.0127456	0.00468041	0	0	0.0046546	0.00524921	0.00599299	0.00381841	0	0.00427666	0	0.00281761	0.00269682	0	0	0	0	0.00686036	0.00137207	0.00306805
934.6	C49H89O13P	PI(40:3)		0	0.00926834	0	0	0	0.00185367	0.00414493	0	0	0	0	0	0	0	0	0	0	0	0	0	0	0	0	0	0	0	0	0
936.6	C49H91O13P	PI(40:2)		0.22271	0.11122	0.240356	0.18033	0.309441	0.212811	0.0734332	0.0175411	0.11471	0.0468041	0.0332016	0.0835116	0.0591537	0.0394887	0.00599299	0.0305473	0.0127709	0.00427666	0.0254556	0.0158087	0.0117138	0.00978609	0.0432406	0.0472245	0.50514	0.0274414	0.126566	0.212143
938.6	C49H93O13P	PI(40:1)		0	0	0	0	0	0	0	0	0	0	0	0	0	0	0	0	0	0	0	0	0	0	0	0	0	0	0	0
940.7	C49H95O13P	PI(40:0)		0.0290492	0.0370734	0.0267062	0.0163936	0.280431	0.0779306	0.113441	0	0.0382367	0	0	0.0139186	0.0104311	0.0166714	0.00599299	0	0.00638545	0	0	0.00247569	0.00339282	0	0	0	0	0	0	0
948.5	C51H79O13P	PI(42:10)		0	0	0	0	0	0	0	0	0	0	0	0	0	0	0	0	0	0	0	0	0	0	0	0	0	0	0	0
950.5	C51H81O13P	PI(42:9)		0	0	0	0.00819682	0	0.00163936	0.00366573	0	0	0	0	0	0	0	0	0	0	0	0	0	0	0	0	0	0	0	0	0
952.6	C51H83O13P	PI(42:8)		0.00968306	0	0	0	0.01934	0.00580462	0.00865059	0	0	0	0	0	0	0	0	0.00381841	0	0	0	0.000763682	0.00170765	0	0.00540508	0	0.00935444	0	0.0029519	0.00427644
954.6	C51H85O13P	PI(42:7)		0.0290492	0.00926834	0	0.00819682	0	0.00930287	0.0118767	0	0.0127456	0	0.00830041	0.0208779	0.00838478	0.00888413	0	0	0	0	0	0	0	0	0	0	0	0	0	0
956.6	C51H87O13P	PI(42:6)		0	0	0	0.00819682	0	0.00163936	0.00366573	0	0	0	0	0	0	0	0	0	0	0	0	0	0	0	0	0.00524717	0	0	0.00104943	0.00234661
958.6	C51H89O13P	PI(42:5)		0	0	0.00890208	0	0.00967002	0.00371442	0.00509342	0	0	0	0	0	0	0	0	0	0	0.00427666	0	0.000855333	0.00191258	0	0	0	0	0	0	0
960.6	C51H91O13P	PI(42:4)		0	0	0	0	0	0	0	0	0	0	0	0	0	0	0	0	0	0	0	0	0	0	0	0	0	0	0	0
962.6	C51H93O13P	PI(42:3)		0	0.00926834	0	0	0.0290101	0.00765568	0.012594	0	0	0	0	0	0	0	0	0	0	0	0	0	0	0	0	0	0	0	0	0
964.7	C51H95O13P	PI(42:2)		0	0	0	0	0.00967002	0.001934	0.00432457	0	0	0	0	0	0	0	0	0	0	0	0	0	0	0	0	0	0	0	0	0
972.5	C53H79O13P	PI(44:12)		0	0	0.00890208	0	0	0.00178042	0.00398113	0	0	0	0	0.0069593	0.00139186	0.0031123	0	0	0	0	0	0	0	0	0	0	0	0	0	0
974.5	C53H81O13P	PI(44:11)		0	0	0	0	0	0	0	0	0	0	0	0	0	0	0	0	0	0	0	0	0	0	0	0	0	0	0	0
976.6	C53H83O13P	PI(44:10)		0	0	0	0	0	0	0	0	0	0	0	0	0	0	0	0	0	0	0	0	0	0	0	0	0	0	0	0
978.6	C53H85O13P	PI(44:9)		0	0	0	0	0	0	0	0	0	0	0	0	0	0	0	0	0	0	0	0	0	0	0	0	0	0	0	0
980.6	C53H87O13P	PI(44:8)		0.00968306	0	0	0	0	0.00193661	0.00433039	0	0	0	0	0	0	0	0	0	0	0	0	0	0	0	0	0	0	0	0	0
982.6	C53H89O13P	PI(44:7)		0	0.0185367	0.0267062	0.0409841	0.0773602	0.0327174	0.0290214	0.00584705	0	0.00468041	0.00830041	0.0208779	0.00794116	0.00783531	0	0.00763682	0	0	0	0.00152736	0.00341529	0	0.00540508	0	0	0.00686036	0.00245309	0.00339821
984.6	C53H91O13P	PI(44:6)		0.00968306	0	0	0	0	0.00193661	0.00433039	0	0	0	0	0	0	0	0	0	0	0	0	0	0	0	0	0	0	0	0	0
986.6	C53H93O13P	PI(44:5)		0	0	0	0	0	0	0	0	0	0	0	0	0	0	0	0	0	0	0	0	0	0	0	0	0	0	0	0
988.7	C53H95O13P	PI(44:4)		0	0	0	0.00819682	0	0.00163936	0.00366573	0.00584705	0	0	0	0	0.00116941	0.00261488	0	0	0	0	0	0	0	0	0	0	0	0	0	0
990.7	C53H97O13P	PI(44:3)		0	0	0	0	0	0	0	0	0	0	0	0	0	0	0	0	0	0	0	0	0	0	0	0	0	0	0	0
992.7	C53H99O13P	PI(44:2)		0	0	0	0	0	0	0	0	0	0	0	0	0	0	0	0	0	0	0	0	0	0	0	0	0	0	0	0
Total PI				0.997355	0.852687	0.854599	0.754107	1.48918	0.989586	0.292434	1.23957	1.78438	0.936082	0.215811	1.69111	1.17339	0.636199	1.94772	1.54646	0.734327	1.71067	2.41828	1.67149	0.618353	1.34559	0.837787	1.16487	1.86153	1.04277	1.25051	0.388335
734.5	C38H72O10PN	PS(32:1)		0.00968306	0.0185367	0	0	0.00967002	0.00757795	0.00780629	0.0584705	0.0382367	0.0561649	0.0166008	0.0626337	0.0464213	0.0190998	0.00599299	0.0114552	0.00638545	0.01283	0.0127278	0.00987829	0.00341374	0.0244652	0.0216203	0.0104943	0.0374177	0.0205811	0.0229157	0.0096712
736.5	C38H74O10PN	PS(32:0)		0.00968306	0	0.00890208	0	0	0.00371703	0.00509723	0.00584705	0	0	0	0	0.00116941	0.00261488	0	0	0.00638545	0	0	0.00127709	0.00285566	0	0	0	0	0	0	0
756.5	C40H70O10PN	PS(34:4)		0	0.00926834	0	0	0	0.00185367	0.00414493	0	0	0.00468041	0	0	0.000936082	0.00209314	0	0	0	0	0	0	0	0	0	0	0	0	0	0
758.5	C40H72O10PN	PS(34:3)		0	0	0	0	0	0	0	0	0	0	0	0	0	0	0.017979	0	0	0	0	0.0035958	0.00804044	0.00489304	0	0	0.00935444	0	0.0028495	0.0042086
760.5	C40H74O10PN	PS(34:2)		0.0290492	0.027805	0	0.0245905	0.0386801	0.0240249	0.0144207	0.0877057	0.0892189	0.0374433	0.0166008	0.069593	0.0601124	0.0320375	0	0.00381841	0.0127709	0.00427666	0	0.0041732	0.00521748	0.00489304	0.0270254	0	0	0	0.00638369	0.011732
762.5	C40H76O10PN	PS(34:1)		0.0580983	0.0926834	0.0623145	0.106559	0.13538	0.091007	0.0320932	0.2982	0.497077	0.318268	0.20751	0.382762	0.340763	0.107554	0.131846	0.183284	0.159636	0.119747	0.381834	0.195269	0.107175	0.17615	0.205393	0.199393	0.318051	0.226392	0.225076	0.0549702
764.5	C40H78O10PN	PS(34:0)		0	0	0	0	0	0	0	0	0	0	0	0	0	0	0	0	0	0	0	0	0	0	0	0	0	0	0	0
780.5	C42H70O10PN	PS(36:6)		0	0	0	0	0	0	0	0	0	0	0	0	0	0	0	0	0	0	0	0	0	0	0	0	0	0	0	0
782.5	C42H72O10PN	PS(36:5)		0	0	0	0	0	0	0	0	0.0127456	0	0	0	0.00254911	0.00569999	0	0	0	0	0	0	0	0	0	0	0	0	0	0
784.5	C42H74O10PN	PS(36:4)		0.00968306	0	0	0	0	0.00193661	0.00433039	0	0	0	0	0	0	0	0	0.0114552	0	0	0.0127278	0.00483661	0.00663806	0.00489304	0	0	0	0	0.000978609	0.00218824
786.5	C42H76O10PN	PS(36:3)		0	0	0.00890208	0	0	0.00178042	0.00398113	0.0175411	0.0254911	0	0.00830041	0.0347965	0.0172258	0.0137253	0	0.00763682	0.0255418	0	0.0127278	0.00918129	0.010621	0.00489304	0.00540508	0.00524717	0	0	0.00310906	0.00284422
788.5	C42H78O10PN	PS(36:2)		0.0871475	0.157562	0.0445104	0.147543	0.21274	0.129901	0.0653034	0.280658	0.331385	0.322948	0.149407	0.306209	0.278122	0.0745136	0.107874	0.118371	0.0510836	0.0555966	0.203645	0.107314	0.0617226	0.0929678	0.129722	0.0839547	0.187089	0.0617433	0.111095	0.0490479
790.6	C42H80O10PN	PS(36:1)		0.367956	0.407807	0.169139	0.229511	0.21274	0.277431	0.104164	0.415141	0.701006	0.45868	0.249012	0.570663	0.4789	0.169613	0.46146	0.496394	0.376742	0.325026	0.712756	0.474476	0.149428	0.406123	0.356735	0.398785	0.542557	0.37732	0.416304	0.0731756
792.6	C42H82O10PN	PS(36:0)	ePS(38:7)	0	0	0	0	0	0	0	0.00584705	0	0	0	0	0.00116941	0.00261488	0	0	0	0	0	0	0	0	0	0	0	0	0	0
806.5	C44H72O10PN	PS(38:7)		0.319541	0.0648784	0.0890208	0.131149	0.13538	0.147994	0.100321	0.00584705	0.0892189	0.00468041	0.0166008	0.0278372	0.0288369	0.0350313	0.0599299	0.0229105	0.0127709	0.01283	0	0.0216883	0.0228708	0.00489304	0.00540508	0.0104943	0.0187089	0.0274414	0.0133886	0.00961867
808.5	C44H74O10PN	PS(38:6)		0.00968306	0	0	0	0	0.00193661	0.00433039	0	0	0.00468041	0	0	0.000936082	0.00209314	0	0.00763682	0	0.00427666	0	0.0023827	0.0034722	0.00489304	0	0	0	0.00686036	0.00235068	0.0032931
810.5	C44H76O10PN	PS(38:5)		0.00968306	0	0	0	0	0.00193661	0.00433039	0	0	0.00468041	0	0	0.000936082	0.00209314	0.00599299	0.00381841	0.00638545	0	0.0254556	0.00833049	0.00990293	0	0.00540508	0.00524717	0.0187089	0.0137207	0.00861637	0.00748029
812.5	C44H78O10PN	PS(38:4)		0.00968306	0	0.00890208	0.00819682	0.01934	0.0092244	0.00686997	0.0116941	0.0509822	0.0421237	0	0.0139186	0.0237437	0.0217097	0.00599299	0.0420025	0.0255418	0.0171067	0.0381834	0.0257655	0.0148646	0.0244652	0.0162152	0.0157415	0.065481	0	0.0243806	0.024622
814.6	C44H80O10PN	PS(38:3)		0.0193661	0.083415	0.0267062	0.0409841	0.0967002	0.0534343	0.034644	0.105247	0.0509822	0.126371	0.0664033	0.111349	0.0920705	0.0318938	0	0.0343657	0.0127709	0.00427666	0.063639	0.0230104	0.0262912	0.00489304	0	0.0157415	0	0.00686036	0.00549898	0.00647317
816.6	C44H82O10PN	PS(38:2)		0.0290492	0	0.0356083	0.0409841	0.0580201	0.0327323	0.021218	0.0350823	0.242166	0.0608453	0.0249012	0.0974303	0.0920849	0.0884472	0	0.0381841	0.0255418	0.0213833	0.0890946	0.0348408	0.033302	0.00489304	0.0324305	0.0209887	0	0.0274414	0.0171507	0.0141288
818.6	C44H84O10PN	PS(38:1)		0.0290492	0.0185367	0.0534125	0.0409841	0.0967002	0.0477365	0.0303196	0.0467764	0.0382367	0.0234021	0.0249012	0.0556744	0.0377982	0.0139099	0.0659229	0.0534578	0.0510836	0.05132	0.0509112	0.0545391	0.00644642	0.0489304	0.0432406	0.0262359	0.0841899	0.0686036	0.0542401	0.022565
820.6	C44H86O10PN	PS(38:0)	ePS(40:7)	0	0	0	0	0	0	0	0.00584705	0	0.00468041	0	0.0069593	0.00349735	0.00329275	0	0	0	0	0	0	0	0	0	0	0	0	0	0
832.5	C46H74O10PN	PS(40:8)		0	0	0	0	0	0	0	0	0	0	0	0	0	0	0	0	0	0	0.0127278	0.00254556	0.00569204	0	0	0	0	0.00686036	0.00137207	0.00306805
834.5	C46H76O10PN	PS(40:7)		0	0.0463417	0	0	0.0386801	0.0170044	0.0234412	0	0.0127456	0	0.0166008	0.0069593	0.00726114	0.00746405	0.035958	0.0267289	0.0446982	0.0684266	0.165461	0.0682546	0.0565056	0.00489304	0.0432406	0.0524717	0.0561266	0	0.0313464	0.0268523
836.5	C46H78O10PN	PS(40:6)		0	0	0	0	0	0	0	0	0.0127456	0	0	0	0.00254911	0.00569999	0	0.0229105	0.0255418	0.0299366	0.0381834	0.0233145	0.0142621	0.00978609	0.0108102	0	0.0841899	0.0137207	0.0237014	0.0342054
838.6	C46H80O10PN	PS(40:5)		0	0	0	0	0.00967002	0.001934	0.00432457	0.00584705	0	0	0	0	0.00116941	0.00261488	0.023972	0.0458209	0.0191564	0.0299366	0.0381834	0.0314139	0.0107378	0.00978609	0.0324305	0.0262359	0.00935444	0.0343018	0.0224217	0.0121065
840.6	C46H82O10PN	PS(40:4)		0.00968306	0	0	0	0	0.00193661	0.00433039	0.00584705	0	0.00468041	0	0	0.00210549	0.00291242	0.00599299	0	0	0	0	0.0011986	0.00268015	0.00489304	0	0	0.00935444	0	0.0028495	0.0042086
842.6	C46H84O10PN	PS(40:3)		0	0.0185367	0	0	0.01934	0.00757534	0.0103769	0.0116941	0	0.00468041	0	0.0417558	0.0116261	0.0175099	0	0.00381841	0	0	0	0.000763682	0.00170765	0	0	0	0	0	0	0
844.6	C46H86O10PN	PS(40:2)		0.0871475	0.00926834	0.0267062	0.00819682	0	0.0262638	0.035398	0.00584705	0.0892189	0.00468041	0	0.0278372	0.0255167	0.0372005	0.00599299	0.0305473	0.0255418	0.0171067	0	0.0158378	0.0128443	0.0195722	0.0108102	0.0157415	0	0	0.00922477	0.00897556
846.6	C46H88O10PN	PS(40:1)		0	0	0.0178042	0.0245905	0.0483501	0.0181489	0.0200779	0.0116941	0.0382367	0.0421237	0.0249012	0.0139186	0.0261749	0.0137966	0.011986	0.0610946	0.0383127	0.0171067	0.063639	0.0384278	0.0239956	0.0391444	0.0216203	0.00524717	0.0467722	0	0.0225568	0.020438
854.5	C48H72O10PN	PS(42:11)		0	0	0	0.00819682	0	0.00163936	0.00366573	0	0	0	0	0	0	0	0	0	0	0	0	0	0	0	0	0.00524717	0	0	0.00104943	0.00234661
856.5	C48H74O10PN	PS(42:10)		0	0	0	0	0.00967002	0.001934	0.00432457	0.00584705	0	0	0	0	0.00116941	0.00261488	0	0	0	0	0	0	0	0	0	0	0	0	0	0
858.5	C48H76O10PN	PS(42:9)		0	0	0	0	0	0	0	0	0	0	0	0	0	0	0	0	0	0	0	0	0	0	0	0	0	0	0	0
860.5	C48H78O10PN	PS(42:8)		0.0193661	0	0	0	0	0.00387322	0.00866079	0.00584705	0	0.00936082	0	0	0.00304157	0.00434618	0	0.00381841	0	0	0	0.000763682	0.00170765	0.00489304	0	0	0	0	0.000978609	0.00218824
862.6	C48H80O10PN	PS(42:7)		0.00968306	0.120488	0.0178042	0	0.00967002	0.0315291	0.050128	0.0233882	0.0382367	0.0140412	0.0415021	0	0.0234336	0.017197	0	0.00763682	0	0	0	0.00152736	0.00341529	0	0	0	0	0	0	0
864.6	C48H82O10PN	PS(42:6)		0	0	0	0	0	0	0	0	0	0.00468041	0	0	0.000936082	0.00209314	0.00599299	0.00381841	0	0	0	0.00196228	0.00279479	0	0.00540508	0	0	0.00686036	0.00245309	0.00339821
866.6	C48H84O10PN	PS(42:5)		0	0	0	0	0	0	0	0	0	0.00468041	0	0	0.000936082	0.00209314	0	0	0	0	0.0127278	0.00254556	0.00569204	0	0.00540508	0	0	0	0.00108102	0.00241722
880.5	C50H74O10PN	PS(44:12)		0	0	0	0	0	0	0	0	0	0	0	0	0	0	0	0	0	0	0	0	0	0	0	0	0	0	0	0
882.5	C50H76O10PN	PS(44:11)		0	0.0185367	0	0	0	0.00370734	0.00828985	0	0	0	0	0.0069593	0.00139186	0.0031123	0	0	0	0	0	0	0	0	0	0	0	0	0	0
884.5	C50H78O10PN	PS(44:10)		0	0	0	0	0	0	0	0	0	0	0	0	0	0	0	0	0	0	0	0	0	0	0	0	0	0	0	0
886.6	C50H80O10PN	PS(44:9)		0	0	0	0	0	0	0	0.00584705	0	0.00936082	0	0	0.00304157	0.00434618	0	0	0	0	0	0	0	0	0	0	0	0	0	0
888.6	C50H82O10PN	PS(44:8)		0	0	0	0	0	0	0	0	0	0	0	0	0	0	0	0	0	0	0	0	0	0	0	0	0	0	0	0
890.6	C50H84O10PN	PS(44:7)		0	0	0	0	0	0	0	0	0	0	0	0	0	0	0.011986	0	0	0	0.0127278	0.00494276	0.00677323	0	0.00540508	0	0	0	0.00108102	0.00241722
892.6	C50H86O10PN	PS(44:6)		0.0193661	0	0	0	0	0.00387322	0.00866079	0	0	0	0	0	0	0	0	0	0	0	0	0	0	0	0	0	0	0	0	0
894.6	C50H88O10PN	PS(44:5)		0	0	0	0	0	0	0	0	0	0	0	0	0	0	0	0	0	0	0	0	0	0	0	0	0	0	0	0
896.6	C50H90O10PN	PS(44:4)		0	0	0.00890208	0	0	0.00178042	0.00398113	0	0	0	0	0	0	0	0	0	0	0	0	0	0	0	0	0	0.00935444	0	0.00187089	0.00418343
898.6	C50H92O10PN	PS(44:3)		0	0	0	0	0	0	0	0	0	0	0	0	0	0	0	0	0	0	0	0	0	0	0	0	0	0	0	0
900.7	C50H94O10PN	PS(44:2)		0	0	0	0	0	0	0	0	0	0	0	0	0	0	0	0	0	0	0	0	0	0	0	0	0	0	0	0
Total PS				1.1426	1.09366	0.578635	0.811485	1.15073	0.955423	0.252477	1.46176	2.35793	1.56794	0.863243	1.83726	1.61763	0.545926	0.964872	1.24098	0.925891	0.791183	1.94735	1.17406	0.462169	0.905213	0.983724	0.897266	1.49671	0.898707	1.03632	0.259898
746.5	C40H76O9PN	ePS(34:2)		0.00968306	0.00926834	0	0	0.00967002	0.00572428	0.00522819	0.00584705	0	0.0140412	0	0	0.00397766	0.00616919	0	0	0	0.00427666	0	0.000855333	0.00191258	0	0	0.00524717	0	0.00686036	0.00242151	0.00336448
748.5	C40H78O9PN	ePS(34:1)		0.00968306	0	0.00890208	0	0	0.00371703	0.00509723	0	0	0.0140412	0	0.0069593	0.00420011	0.00627263	0.00599299	0.0114552	0.0127709	0	0	0.00604383	0.00607444	0	0.0108102	0.00524717	0.00935444	0.00686036	0.00645442	0.0042031
772.5	C42H78O9PN	ePS(36:3)		0	0.00926834	0	0	0.00967002	0.00378767	0.00518843	0.00584705	0.0127456	0.0140412	0	0	0.00652677	0.00672309	0	0	0	0	0	0	0	0	0	0.00524717	0	0	0.00104943	0.00234661
774.6	C42H80O9PN	ePS(36:2)		0	0	0	0.00819682	0.01934	0.00550737	0.00850837	0	0	0.00936082	0	0.0208779	0.00604775	0.00922816	0.00599299	0.00381841	0	0.00855333	0	0.00367295	0.00374843	0.00978609	0.0108102	0.00524717	0.00935444	0	0.00703957	0.00446899
776.6	C42H82O9PN	ePS(36:1)		0.0193661	0.00926834	0	0	0	0.00572689	0.00861629	0.0116941	0	0	0	0.0069593	0.00373068	0.00537573	0.0419509	0.0534578	0.0383127	0.03849	0.0509112	0.0446245	0.00710928	0.00978609	0.0162152	0.0209887	0.065481	0.0274414	0.0279825	0.021937
778.6	C42H84O9PN	ePS(36:0)		0	0	0	0	0	0	0	0.00584705	0	0.00468041	0	0	0.00210549	0.00291242	0	0	0	0	0	0	0	0	0	0.00524717	0	0	0.00104943	0.00234661
794.5	C44H76O9PN	ePS(38:6)		0	0	0	0	0	0	0	0	0	0.00468041	0	0	0.000936082	0.00209314	0	0.00381841	0	0	0.0127278	0.00330924	0.00551864	0	0	0	0	0	0	0
796.5	C44H78O9PN	ePS(38:5)		0	0.00926834	0	0	0	0.00185367	0.00414493	0.0116941	0	0	0	0	0.00233882	0.00522976	0	0	0	0	0	0	0	0.00489304	0	0	0	0	0.000978609	0.00218824
798.6	C44H80O9PN	ePS(38:4)		0	0.00926834	0	0	0	0.00185367	0.00414493	0.00584705	0	0.00936082	0.00830041	0	0.00470166	0.00447722	0	0.00381841	0	0	0.0127278	0.00330924	0.00551864	0	0	0.00524717	0	0	0.00104943	0.00234661
800.6	C44H82O9PN	ePS(38:3)		0.0387322	0.0185367	0	0.00819682	0.0290101	0.0188952	0.0155518	0.0116941	0	0	0	0	0.00233882	0.00522976	0	0	0	0	0	0	0	0.00489304	0	0	0.0187089	0	0.00472038	0.00810175
802.6	C44H84O9PN	ePS(38:2)		0.00968306	0.00926834	0.0178042	0.00819682	0	0.00899047	0.00631855	0.0292352	0	0	0.00830041	0.0208779	0.0116827	0.0130101	0.011986	0.0152736	0.00638545	0	0.0254556	0.0118201	0.00958033	0.00489304	0.00540508	0	0.0280633	0	0.00767229	0.0116875
804.6	C44H86O9PN	ePS(38:1)		0.00968306	0	0	0	0	0.00193661	0.00433039	0	0	0.0140412	0	0	0.00280825	0.00627943	0	0.0114552	0.0127709	0.0171067	0	0.00826656	0.00783065	0.00489304	0.0108102	0	0	0.00686036	0.00451271	0.00463797
824.6	C46H82O9PN	ePS(40:5)		0	0	0	0	0	0	0	0	0	0	0	0	0	0	0	0.00381841	0	0	0	0.000763682	0.00170765	0	0	0	0	0	0	0
826.6	C46H84O9PN	ePS(40:4)		0	0	0	0	0	0	0	0	0	0	0	0	0	0	0	0	0	0	0	0	0	0	0	0	0.00935444	0	0.00187089	0.00418343
828.6	C46H86O9PN	ePS(40:3)		0.0387322	0	0.00890208	0.00819682	0.00967002	0.0131002	0.0148497	0.00584705	0.0254911	0.0140412	0.00830041	0.0069593	0.0121278	0.0081094	0.017979	0.00381841	0	0	0.0127278	0.00690504	0.00808429	0.0146791	0.00540508	0.0104943	0.065481	0.0617433	0.0315606	0.0294723
830.6	C46H88O9PN	ePS(40:2)		0	0	0	0	0	0	0	0	0	0	0	0	0	0	0	0.00381841	0	0	0	0.000763682	0.00170765	0.00489304	0	0	0.00935444	0	0.0028495	0.0042086
Total ePS				0.135563	0.0741467	0.0356083	0.0327873	0.0773602	0.0710931	0.0416277	0.0935528	0.0382367	0.0982886	0.0249012	0.0626337	0.0635226	0.0325663	0.0839019	0.114552	0.07024	0.0684266	0.11455	0.0903342	0.0229021	0.0587165	0.0594558	0.0629661	0.215152	0.109766	0.101211	0.067208
658.4	C35H61O8P	PA(32:4)		0	0	0	0	0	0	0	0	0	0	0	0	0	0	0	0	0	0	0	0	0	0	0	0	0	0	0	0
660.4	C35H63O8P	PA(32:3)		0	0	0	0	0	0	0	0	0	0	0	0	0	0	0	0	0	0	0	0	0	0	0	0	0	0	0	0
662.4	C35H65O8P	PA(32:2)		0	0	0	0	0.00967002	0.001934	0.00432457	0	0	0.00468041	0	0	0.000936082	0.00209314	0	0	0	0	0	0	0	0	0	0	0	0	0	0
664.5	C35H67O8P	PA(32:1)		0.00968306	0.00926834	0	0.0163936	0.01934	0.010937	0.00748934	0.0116941	0.0637278	0.0514845	0.00830041	0.0208779	0.0312169	0.0249045	0.00599299	0.00763682	0.00638545	0	0.0127278	0.00654861	0.00454385	0.0244652	0	0.00524717	0.0187089	0.00686036	0.0110563	0.0101483
666.5	C35H69O8P	PA(32:0)		0	0	0.00890208	0.00819682	0.00967002	0.00535378	0.00491501	0.00584705	0.0127456	0.00936082	0	0.0069593	0.00698255	0.00471472	0.029965	0.00381841	0.00638545	0.02566	0.0381834	0.0208024	0.0150495	0.0195722	0.00540508	0.0157415	0.00935444	0.00686036	0.0113867	0.00604905
686.4	C37H65O8P	PA(34:4)		0	0	0	0	0	0	0	0	0	0	0	0	0	0	0	0	0	0	0	0	0	0	0	0	0	0	0	0
688.5	C37H67O8P	PA(34:3)		0	0	0	0.00819682	0	0.00163936	0.00366573	0	0	0	0	0	0	0	0	0	0	0	0	0	0	0	0	0	0	0	0	0
690.5	C37H69O8P	PA(34:2)		0	0	0	0	0	0	0	0.00584705	0.0254911	0.0140412	0	0.0139186	0.0118596	0.0096387	0.011986	0	0	0	0	0.0023972	0.0053603	0	0	0.00524717	0	0	0.00104943	0.00234661
692.5	C37H71O8P	PA(34:1)		0.0677814	0.0648784	0.0267062	0.0491809	0.0386801	0.0494454	0.017374	0.128635	0.254911	0.163814	0.0498025	0.111349	0.141702	0.0755693	0.0419509	0.0381841	0.0510836	0.0641499	0.11455	0.0619838	0.0310422	0.0685026	0.0756711	0.0996963	0.112253	0.102905	0.0918057	0.0187545
710.4	C39H65O8P	PA(36:6)		0	0.00926834	0	0	0	0.00185367	0.00414493	0	0	0	0	0	0	0	0	0	0	0	0	0	0	0	0	0	0	0	0	0
712.5	C39H67O8P	PA(36:5)		0	0	0	0	0	0	0	0	0	0	0	0	0	0	0	0	0	0	0	0	0	0	0	0	0	0	0	0
714.5	C39H69O8P	PA(36:4)		0.00968306	0	0	0	0	0.00193661	0.00433039	0	0	0	0	0	0	0	0	0	0	0	0	0	0	0	0	0	0	0	0	0
716.5	C39H71O8P	PA(36:3)		0	0.00926834	0	0.00819682	0	0.00349303	0.00479801	0.00584705	0	0	0	0	0.00116941	0.00261488	0	0	0	0	0	0	0	0	0	0	0	0	0	0
718.5	C39H73O8P	PA(36:2)		0.0774645	0.0741467	0.0445104	0.0327873	0	0.0457818	0.0319171	0.0818587	0.152947	0.0982886	0.0498025	0.0974303	0.0960653	0.0373643	0.017979	0.0152736	0.0191564	0.0171067	0.0763668	0.0291765	0.0264182	0.0391444	0.0162152	0.0157415	0.0374177	0.0343018	0.0285641	0.0116207
738.5	C41H69O8P	PA(38:6)		0	0	0	0	0	0	0	0	0	0.00468041	0	0	0.000936082	0.00209314	0	0	0	0	0	0	0	0	0	0	0	0	0	0
740.5	C41H71O8P	PA(38:5)		0	0	0	0	0	0	0	0	0	0	0	0	0	0	0	0	0	0	0	0	0	0	0	0	0	0	0	0
742.5	C41H73O8P	PA(38:4)		0	0	0	0	0	0	0	0.00584705	0	0	0	0.0069593	0.00256127	0.00352914	0.00599299	0	0	0	0.0127278	0.00374416	0.00565286	0	0	0	0	0	0	0
744.5	C41H75O8P	PA(38:3)		0	0	0	0	0	0	0	0.0116941	0.0127456	0	0	0	0.00488793	0.00670339	0.00599299	0.00381841	0.00638545	0	0	0.00323937	0.00311459	0	0	0	0	0	0	0
746.5	C41H77O8P	PA(38:2)		0.00968306	0.00926834	0	0	0.00967002	0.00572428	0.00522819	0.00584705	0	0.0187216	0	0.0208779	0.00908932	0.0100933	0.00599299	0.00763682	0	0.00427666	0.0127278	0.00612685	0.00465918	0.00978609	0	0	0.0187089	0.00686036	0.00707106	0.00779189
764.5	C43H71O8P	PA(40:7)		0	0	0	0	0	0	0	0	0	0	0	0	0	0	0	0	0	0	0	0	0	0	0	0	0	0	0	0
766.5	C43H73O8P	PA(40:6)		0	0	0	0	0	0	0	0	0	0	0	0	0	0	0	0	0	0	0	0	0	0	0	0	0	0	0	0
768.5	C43H75O8P	PA(40:5)		0	0	0	0	0	0	0	0.00584705	0	0	0	0	0.00116941	0.00261488	0	0	0	0	0	0	0	0	0	0	0	0	0	0
Total PA				0.174295	0.176098	0.0801187	0.122952	0.0870302	0.128099	0.0459708	0.268964	0.522568	0.365072	0.107905	0.278372	0.308576	0.151438	0.125853	0.0763682	0.0893964	0.111193	0.267284	0.134019	0.0769122	0.16147	0.0972914	0.141674	0.196443	0.157788	0.150933	0.036029
710.5	C36H69O10P	PG(30:1)		0.0968306	0.05561	0.106825	0.0819682	0.0870302	0.0856528	0.0193083	0.0233882	0	0.0187216	0.00830041	0.0278372	0.0156495	0.0113664	0.011986	0.0152736	0.0255418	0.00427666	0.0127278	0.0139612	0.00766561	0.00978609	0.0270254	0	0	0.0274414	0.0128506	0.0137248
712.5	C36H71O10P	PG(30:0)		0	0.00926834	0	0	0.00967002	0.00378767	0.00518843	0	0.0127456	0	0	0	0.00254911	0.00569999	0	0	0	0	0	0	0	0	0	0	0	0	0	0
736.5	C38H71O10P	PG(32:2)		0	0	0	0	0	0	0	0	0	0	0	0	0	0	0	0	0	0	0	0	0	0	0	0	0	0	0	0
738.5	C38H73O10P	PG(32:1)		0.0387322	0.0185367	0.0267062	0.00819682	0.0580201	0.0300384	0.0192289	0	0	0.0280825	0.00830041	0.0069593	0.00866844	0.0115135	0.011986	0.00763682	0	0.00855333	0	0.00563523	0.00539364	0.00489304	0.0162152	0.00524717	0	0	0.00527109	0.00662356
740.5	C38H75O10P	PG(32:0)		0.00968306	0.00926834	0.00890208	0	0	0.00557069	0.00509283	0.00584705	0.0254911	0.00936082	0	0.0069593	0.00953166	0.00956268	0.00599299	0.0114552	0	0	0	0.00348965	0.00515389	0	0.00540508	0	0	0	0.00108102	0.00241722
760.5	C40H71O10P	PG(34:4)		0.00968306	0.0185367	0	0.00819682	0.00967002	0.00921731	0.00658165	0	0	0	0	0	0	0	0	0	0.00638545	0	0	0.00127709	0.00285566	0	0	0	0	0	0	0
762.5	C40H73O10P	PG(34:3)		0	0	0	0.00819682	0.00967002	0.00357337	0.00492068	0.00584705	0	0	0	0.0069593	0.00256127	0.00352914	0	0	0	0	0	0	0	0	0.00540508	0	0	0	0.00108102	0.00241722
764.5	C40H75O10P	PG(34:2)		0	0	0	0.00819682	0	0.00163936	0.00366573	0	0	0	0	0	0	0	0.00599299	0.00381841	0	0	0	0.00196228	0.00279479	0	0	0	0	0	0	0
766.5	C40H77O10P	PG(34:1)		0	0	0.0178042	0.0163936	0.0290101	0.0126416	0.0125327	0.0292352	0.0637278	0.0140412	0.00830041	0.0278372	0.0286284	0.0215579	0.017979	0.0229105	0.0191564	0.00855333	0.0254556	0.0188109	0.00646118	0.00978609	0.0216203	0.00524717	0.0280633	0.00686036	0.0143154	0.0100086
768.5	C40H79O10P	PG(34:0)		0	0	0	0	0	0	0	0	0	0.00936082	0	0.0069593	0.00326403	0.00454938	0.00599299	0	0	0	0	0.0011986	0.00268015	0.00489304	0	0	0	0.00686036	0.00235068	0.0032931
788.5	C42H75O10P	PG(36:4)		0	0	0	0	0	0	0	0	0	0	0	0	0	0	0	0	0	0	0	0	0	0	0	0	0	0	0	0
790.5	C42H77O10P	PG(36:3)		0	0	0	0	0	0	0	0.00584705	0	0	0	0	0.00116941	0.00261488	0	0	0	0	0	0	0	0	0	0	0	0	0	0
792.5	C42H79O10P	PG(36:2)		0	0	0	0	0	0	0	0	0	0.00468041	0.00830041	0	0.00259616	0.00377832	0.00599299	0.00381841	0	0	0	0.00196228	0.00279479	0	0.00540508	0	0	0	0.00108102	0.00241722
794.6	C42H81O10P	PG(36:1)		0	0	0	0	0	0	0	0.00584705	0.0254911	0.00468041	0.00830041	0	0.0088638	0.00977182	0.023972	0.0114552	0.00638545	0.00427666	0.0127278	0.0117634	0.00766563	0.0244652	0	0	0	0	0.00489304	0.0109412
812.5	C44H75O10P	PG(38:6)		0	0	0.00890208	0	0	0.00178042	0.00398113	0	0	0	0	0	0	0	0	0	0	0	0	0	0	0	0	0	0	0	0	0
814.5	C44H77O10P	PG(38:5)		0	0	0	0	0	0	0	0	0	0	0	0	0	0	0	0	0	0	0	0	0	0	0	0	0	0	0	0
Total PG				0.154929	0.11122	0.169139	0.131149	0.20307	0.153902	0.0353207	0.0760116	0.127456	0.0889278	0.0415021	0.0835116	0.0834817	0.0307468	0.0898949	0.0763682	0.0574691	0.02566	0.0509112	0.0600607	0.0246468	0.0538235	0.0810761	0.0104943	0.0280633	0.0411622	0.0429239	0.0266928
Total Routine Polar Lipids				100	100	100	100	100	100	0	100	100	100	100	100	100	0	100	100	100	100	100	100	0	100	100	100	100	100	100	0
249.185	C16H25O2	16:3		0	0	0	0.121195	0	0.0242389	0.0541999	0	0	0	0	0.129569	0.0259137	0.0579449	0	0	0	0	0	0	0	0	0	0	0	0	0	0
251.2	C16H27O2	16:2		0.179132	0.170833	0.180855	0.15198	0.306777	0.197915	0.0619237	0.137267	0	0.160486	0.18117	0.145765	0.124938	0.0718	0.215424	0	0.196842	0.306444	0.208739	0.18549	0.112474	0	0.342776	0.300676	0.200589	0	0.168808	0.162524
253.216	C16H29O2	16:1		1.4725	1.48995	1.20042	1.29572	0.982979	1.28831	0.209519	1.83471	1.14335	1.78068	0.99396	1.01018	1.35257	0.419923	0.995091	0.781422	1.53341	1.61237	1.46986	1.27843	0.367584	1.74104	1.55287	1.69793	0.691053	1.44373	1.42532	0.427128
255.232	C16H31O2	16:0		27.3789	27.9555	34.8143	33.323	42.4623	33.1868	6.11963	21.5277	27.7181	22.8713	33.6286	34.9665	28.1424	6.09069	31.2715	41.6267	29.1745	23.9079	25.2649	30.2491	7.01252	22.4107	31.4738	24.8792	40.968	27.8423	29.5148	7.24165
277.216	C18H29O2	18:3		0	0	0	0	0	0	0	0	0	0	0	0	0	0	0	0	0	0	0	0	0	0	0	0	0.21602	0	0.0432039	0.0966069
279.232	C18H31O2	18:2		2.00868	0.493272	0.467387	0.438557	0.563056	0.794191	0.680485	1.81133	0.464648	1.81804	0.283823	0.40003	0.955575	0.786934	0.230729	0	1.64031	0.387673	1.81119	0.81398	0.845833	2.18719	0.362982	1.79475	0.177514	0	0.904487	1.00967
281.247	C18H33O2	18:1		14.48	12.6721	11.4385	12.5326	5.88465	11.4016	3.2714	20.5123	12.0553	19.697	11.627	8.96661	14.5716	5.19564	9.24597	5.56403	17.4517	18.7232	17.798	13.7566	5.96067	20.3554	13.7543	19.0282	5.83737	13.1467	14.4244	5.74869
283.263	C18H35O2	18:0		35.106	36.4571	41.2038	43.5002	49.1165	41.0767	5.64617	29.1007	37.9946	30.5296	45.6619	46.7371	38.0048	8.21653	43.6786	50.5536	39.4606	32.3739	34.623	40.1379	7.28313	30.333	41.9129	34.1932	50.7274	36.5661	38.7465	7.9032
303.232	C20H31O2	20:4		19.3747	20.7613	10.6948	8.63674	0.683786	12.0303	8.24944	25.0759	20.6239	23.143	7.5007	7.64422	16.7976	8.56815	14.1687	1.34833	10.4091	22.6885	18.6469	13.4523	8.19407	22.8154	10.4489	17.9957	0.833081	21.0012	14.6188	9.0382
327.232	C22H31O2	22:6		0	0	0	0	0	0	0	0	0	0	0.122815	0	0.0245631	0.0549247	0.194035	0.125919	0.133518	0	0.177387	0.126172	0.0761608	0.157295	0.151476	0.11029	0.349001	0	0.153612	0.126163
Total FFA				100	100	100	100	100	100	0	100	100	100	100	100	100	0	100	100	100	100	100	100	0	100	100	100	100	100	100	0
640.601	C43H78NO2	C16:1 CE		22.599	24.2708	26.0803	28.4736	28.6721	26.0191	2.63726	26.0529	23.949	30.7894	26.2821	26.6016	26.735	2.49441	10.5413	11.5373	13.1026	12.0326	14.8414	12.4111	1.6422	16.6178	14.4512	22.7388	22.983	15.5573	18.4696	4.08213
642.617	C43H80NO2	C16:0 CE		24.1695	41.5319	27.7105	33.0907	25.5706	30.4146	7.08048	33.066	34.2861	38.7807	38.3016	25.5313	33.9932	5.33926	23.7087	23.3426	28.933	29.0572	29.0879	26.8259	3.01603	40.6297	38.4835	31.2771	34.2665	45.1503	37.9614	5.41768
668.632	C45H82NO2	C18:1 CE		42.9768	31.3869	37.671	33.837	38.3533	36.845	4.45522	32.3146	37.95	25.5456	30.3827	41.7791	33.5944	6.37764	56.3348	56.9322	49.4591	49.5521	47.5201	51.9597	4.34816	31.493	39.3662	41.4375	35.2887	32.6047	36.038	4.27892
670.648	C45H84NO2	C18:0 CE		10.2547	2.81049	8.53816	4.59873	7.40402	6.72123	3.00217	8.56649	3.81479	4.88424	5.03363	6.08796	5.67742	1.80473	9.41514	8.18792	8.50523	9.35813	8.55053	8.80339	0.550822	11.2595	7.69919	4.54668	7.46173	6.68758	7.53093	2.42653
Total Cholesterol esters				100	100	100	100	100	100	0	100	100	100	100	100	100	0	100	100	100	100	100	100	0	100	100	100	100	100	100	0
556.492	C33H66O5N	30:1		1.72681	1.02723	1.22597	0	0	0.796	0.770061	2.26813	4.66684	2.35398	0.55744	2.04076	2.37743	1.47306	1.79816	1.36886	1.34439	1.87184	1.99218	1.67509	0.298974	1.61209	1.83326	3.01208	1.27104	2.46979	2.03965	0.697638
584.524	C35H70O5N	32:1		4.06513	2.54555	3.60466	3.03459	3.33101	3.31619	0.573919	8.96505	14.4966	16.2081	13.6592	20.7266	14.8111	4.25872	30.4512	16.1396	21.5208	26.5996	20.9205	23.1263	5.5221	31.1226	32.1569	30.8142	31.6649	31.2316	31.398	0.522352
586.539	C35H72O5N	32:0		0.919426	0.398103	1.01285	0	0	0.466075	0.485684	0.722891	0.221009	0	0	0	0.18878	0.313539	0	0	0	0	0	0	0	0	0.375643	0	0	0.490085	0.173146	0.240517
606.508	C37H68O5N	34:4		52.6629	41.2896	66.0081	75.2259	79.7284	62.983	15.9417	29.3665	31.0188	20.9793	51.3544	31.897	32.9232	11.1769	33.994	57.414	44.3403	29.7277	47.7198	42.6392	11.0504	28.8127	28.2044	23.0899	32.9852	28.8723	28.3929	3.5232
608.524	C37H70O5N	34:3		4.84069	6.94637	1.69603	0.399432	0	2.7765	3.00731	5.89998	3.48436	5.61183	0	0.230524	3.04534	2.83398	1.91297	0	0.161763	1.8261	0.135524	0.807272	0.972137	3.03096	1.63598	2.03438	0	3.10953	1.96217	1.26693
610.539	C37H72O5N	34:2		5.80363	3.76395	6.47687	5.57095	6.55576	5.63423	1.12804	14.2483	17.403	18.1572	19.3537	24.0935	18.6511	3.58119	11.0128	9.49842	12.9679	19.5621	9.2367	12.4556	4.24126	17.1383	21.9524	20.7374	22.08	16.1856	19.6187	2.77009
612.555	C37H74O5N	34:1		1.79852	1.73629	0.943482	0.758676	1.73502	1.3944	0.500923	4.06105	4.98773	3.62382	4.07591	5.84078	4.51786	0.890816	2.40437	2.42626	2.25095	2.87648	1.2553	2.24267	0.599279	4.26162	3.83899	5.34915	3.58995	4.3915	4.28624	0.675704
630.508	C39H68O5N	36:6		1.1739	0.995348	0.704091	0.23749	0.0571499	0.633596	0.478788	0.622148	0.0616157	0.458597	0.0898504	0.295804	0.305603	0.239678	0.440736	0.0592086	0.146294	0.441605	0.288307	0.27523	0.172144	0.206638	0.624071	0.248089	0	0	0.21576	0.255417
632.524	C39H70O5N	36:5		1.68286	1.88399	0.0706119	0.389953	0.0494833	0.81538	0.89676	1.44787	0.396792	1.53948	0.0630564	0.0896026	0.707361	0.730409	0.323801	0.0371456	0.121019	0.105318	0	0.117457	0.125483	0.743988	0	0.15423	0	0.537396	0.287123	0.336861
634.539	C39H72O5N	36:4		6.79674	11.7131	3.99837	3.48507	0.216704	5.24199	4.30636	8.0397	4.71775	8.56616	1.43076	2.00367	4.95161	3.30691	2.05894	0.131037	1.14607	2.29801	1.47998	1.42281	0.854278	2.45853	1.24343	2.79855	0	1.9958	1.69926	1.11446
[truncated: 523 more rows]

## Sheet: percent of totals
Percent total signal				% total signal					% total signal							% total signal							% total signal							% total signal
									5_Undiff_CG4_5							10_Diff_CG4_5							15_MSI1_OE_5							20_Mock_OE_5
[truncated: 916 more rows]

## Sheet: signal-per-million cells
	Signal per million cells				1	1.2	1	1.1	1.1	nmol per million cells		1.1	1.6	1.4	1.5	1.3	nmol per million cells		2.7	1.8	3.3	3.45	3.45	nmol per million cells		2.3	3.1	3.6	4	2.8	nmol per million cells
[truncated: 918 more rows]

[truncated: 7 more sheets: signal-per-sample sent, nmol-analyzed, summary-IS-corrected, imported summary from web, FFA and chol ester, DAG, TAG]
